# Supplementary material for: Transcriptome Analysis of Microglia Reveals That the TLR2/IRF7 Signaling Axis Mediates Neuroinflammation After Subarachnoid Hemorrhage
Source: Front Aging Neurosci. 2021 Jun 30;13:645649. doi: 10.3389/fnagi.2021.645649 (PMC8278202; doi:10.3389/fnagi.2021.645649)
Supplement: Supplementary file 1 [file Data_Sheet_1.CSV]

Category	GO	Description	PARENT_GO	LogP	Z-score	#GeneInGOAndHitList	Hits	Log(q-value)
BP	GO:0031347	regulation of defense response	19_GO:0050896 response to stimulus	-15.76663263	9.549160599	97	Acp5|Adam8|Adora2a|Adora2b|Fabp4|Cd5l|Apod|Arg1|Arg2|Bst1|Cd24a|Cd44|Cfh|Ccr1|Ccr2|Ccr7|Cst7|Ctla2a|Dnase1l3|Fanca|Fcnb|Fgl2|Fgr|Gja1|Cxcl1|Hmgb3|Ifi204|Ifng|Igf2|Il1b|Il1r2|Il2ra|Acod1|Lag3|Lpl|Ltf|Smad3|Mef2c|Mif|Cd200|Nfkb1|Nos2|Osm|Prkca|Pla2g2d|Psmb4|S100a8|S100a9|Sphk1|Tap1|Tgm2|Cd40|Pglyrp1|Plscr1|Nr1h3|Ets1|Mgll|Tlr2|Usp18|Sh2d1b1|Klrk1|Pbk|Mfhas1|Tslp|Irf7|Mefv|Calcrl|Htra1|Ikbke|Clec4e|…	-11.41949784
BP	GO:0006954	inflammatory response	19_GO:0050896 response to stimulus	-13.57317988	8.669998297	98	Acp5|Adam8|Adora2a|Adora2b|Adra2a|Fabp4|Cd5l|Apod|Bst1|Cd24a|Cd44|Cfh|Chil3|Ccr1|Ccr2|Ccr7|Csf1r|Cst7|Ctla2a|Dnase1l3|Ecm1|Epha2|Fanca|Fn1|Gja1|Lilrb4a|Cxcl1|Cxcl10|Ifng|Il1b|Il1r2|Il1rn|Il2ra|Acod1|Itgb2l|Kit|Lpl|Smad3|Mif|Cd200|Naip6|Nfkb1|Nos2|Orm1|Osm|Prkca|Pla2g2d|Psmb4|Pstpip1|Ptger2|S100a8|S100a9|Saa3|Ccl6|Ccl7|Ccl9|Cxcl2|Sphk1|Serpina3n|Sdc1|Tgm2|Thbs1|Timp1|Cd40|Pglyrp1|Plscr1|Nr1h3|Ets1…	-9.988348309
BP	GO:0050727	regulation of inflammatory response	19_GO:0050896 response to stimulus	-9.949163699	7.513395702	57	Acp5|Adam8|Adora2a|Adora2b|Fabp4|Cd5l|Apod|Bst1|Cd24a|Cd44|Cfh|Ccr2|Ccr7|Cst7|Ctla2a|Dnase1l3|Fanca|Ifng|Il1b|Il1r2|Il2ra|Acod1|Lpl|Smad3|Mif|Cd200|Nfkb1|Nos2|Osm|Prkca|Pla2g2d|Psmb4|S100a8|S100a9|Sphk1|Tgm2|Pglyrp1|Nr1h3|Ets1|Mgll|Tlr2|Usp18|Pbk|Mfhas1|Tslp|Mefv|Calcrl|Zbp1|Il33|Cdk19|Ffar4|Tlr3|Pde2a|Metrnl|Cd200r4|Tarm1|Gpr31b	-7.049186948
BP	GO:0032103	positive regulation of response to external stimulus	19_GO:0048518 positive regulation of biological process	-7.173904855	6.180439922	46	Adam8|Adora2b|Fabp4|Arg1|Cd24a|Cxcr4|Ccr1|Ccr2|Ccr7|Csf1r|F7|Fn1|Cxcl1|Cxcl10|Ifng|Il1b|Acod1|Lpl|Smad3|Mif|Osm|Pdgfb|Pgf|Prkca|S100a8|S100a9|Sell|Stx3|Tgm2|Thbs1|Ets1|Tlr2|Pla2g7|Tnfsf14|Tslp|Cxcl14|Zbp1|Smoc2|P2ry12|Il33|Cdk19|Il23a|Tlr3|Pde2a|Tarm1|Scimp	-4.724397163
BP	GO:0050729	positive regulation of inflammatory response	19_GO:0048518 positive regulation of biological process	-5.04255869	5.211603139	24	Adam8|Adora2b|Fabp4|Cd24a|Ccr2|Ccr7|Ifng|Il1b|Lpl|Mif|Osm|Prkca|S100a8|S100a9|Tgm2|Ets1|Tlr2|Tslp|Zbp1|Il33|Cdk19|Tlr3|Pde2a|Tarm1	-3.018380084
BP	GO:1903047	mitotic cell cycle process	19_GO:0009987 cellular process	-15.42733295	9.417024008	97	Birc5|Rhob|Bub1|Bub1b|Calm3|Ccna2|Ccnb2|Ccne1|Ccnf|Cdc25b|Cdk1|Cdc7|Cdkn1a|Cdkn1c|Cdkn2c|Cdkn2d|Cenpa|E2f1|Ect2|Eif4ebp1|Eya1|Gja1|Pdpn|Hspa2|Igf2|Il1b|Klf4|Lmnb1|Mcm2|Mcm4|Mcm6|Nek2|Orc1|Pdgfb|Abcb1a|Plk1|Pole|Psme2|Kif20a|Rad51|Ran|Rock2|Slfn1|Sox4|Sphk1|Aurkb|Aurka|Tacc3|Ttk|Spry1|Racgap1|Tjp3|Knstrn|Ppp1r10|Cdca8|Cks1b|Spag5|Mad2l1|Gpr132|Cenpk|Cables1|Rgcc|Spc25|Nuf2|Ndc80|Cdt1|Cdca5|Ube2c|A…	-11.38122816
BP	GO:0010564	regulation of cell cycle process	19_GO:0050789 regulation of biological process	-7.488428447	6.121441754	69	Birc5|Bub1|Bub1b|Ccnf|Cdc25b|Cdk1|Cdc7|Cdk5r1|Cdkn1a|Cdkn1c|Cdkn2d|E2f1|Ect2|Pdpn|Hmga2|Hspa2|Igf2|Il1b|Klf4|Lmnb1|Mif|Nek2|Orc1|Osm|Pdgfb|Plk1|Psme2|Kif20a|Rock2|Slfn1|Sox4|Sphk1|Plk4|Aurkb|Aurka|Tacc3|Ttk|Nubp1|Racgap1|Tjp3|Bin1|Knstrn|Ppp1r10|Spag5|Mad2l1|Gpr132|Piwil2|Rpl23|Rgcc|Ndc80|Cdt1|Cdca5|Ube2c|Tcim|Spdl1|Sfpq|Tpx2|Gpsm2|Cul9|Gpnmb|Cdc20|Nusap1|Mepce|Prc1|Setd2|Zc3h12d|Ccnb1|Atp2b4|Brs…	-4.986391704
BP	GO:0044772	mitotic cell cycle phase transition	19_GO:0009987 cellular process	-6.805724054	5.927608886	49	Birc5|Bub1|Bub1b|Calm3|Ccna2|Ccnb2|Ccne1|Ccnf|Cdc25b|Cdk1|Cdc7|Cdkn1a|Cdkn1c|Cdkn2c|Cdkn2d|E2f1|Eif4ebp1|Pdpn|Hspa2|Klf4|Lmnb1|Orc1|Abcb1a|Plk1|Pole|Psme2|Slfn1|Sox4|Aurkb|Tacc3|Ttk|Tjp3|Cks1b|Mad2l1|Gpr132|Cables1|Rgcc|Ndc80|Cdt1|Cdca5|Ube2c|Spdl1|Clasp2|Gpnmb|Tcf19|Mepce|Zc3h12d|Ccnb1|Brsk1	-4.427072219
BP	GO:0045787	positive regulation of cell cycle	19_GO:0048518 positive regulation of biological process	-6.683616725	5.879989158	47	Abl1|Birc5|Cdc25b|Cdk1|Cdc7|Cdk5r1|Cdkn1a|Ect2|Eif4ebp1|Hes1|Hspa2|Igf2|Il1b|Lmnb1|Lrp6|Mif|Cited2|Orc1|Pdgfb|Pim1|Prkca|Prox1|Rock2|Sox4|Sphk1|Plk4|Aurkb|Aurka|Racgap1|Ppp1r10|Usp2|Cks1b|Spag5|Mad2l1|Piwil2|Smoc2|Rpl23|Rgcc|Ndc80|Cdt1|Cdca5|Ube2c|Sfpq|Gpsm2|Nusap1|Mepce|Ccnb1	-4.321896729
BP	GO:0044770	cell cycle phase transition	19_GO:0009987 cellular process	-6.637885813	5.797105015	52	Birc5|Bub1|Bub1b|Calm3|Ccna2|Ccnb2|Ccne1|Ccnf|Cdc25b|Cdk1|Cdc7|Cdkn1a|Cdkn1c|Cdkn2c|Cdkn2d|E2f1|Eif4ebp1|Pdpn|Hspa2|Klf4|Lmnb1|Orc1|Abcb1a|Plk1|Pole|Psme2|Slfn1|Sox4|Aurkb|Tacc3|Timeless|Ttk|Tjp3|Cks1b|Mad2l1|Gpr132|Cables1|Rgcc|Ndc80|Cdt1|Cdca5|Ube2c|Tcim|Spdl1|Clasp2|Gpnmb|Tcf19|Mepce|Zc3h12d|Ccnb1|Atp2b4|Brsk1	-4.286386225
BP	GO:0007346	regulation of mitotic cell cycle	19_GO:0050789 regulation of biological process	-6.166672078	5.469533406	58	Abl1|Birc5|Bub1|Bub1b|Cdc25b|Cdk1|Cdc7|Cdkn1a|Cdkn1c|E2f1|Eif4ebp1|Pdpn|Hes1|Hspa2|Igf2|Il1b|Klf4|Lmnb1|Smad3|Nek2|Orc1|Pdgfb|Prkca|Plk1|Psme2|Slfn1|Sox4|Sphk1|Aurkb|Tacc3|Ttk|Tjp3|Ppp1r10|Usp2|Cks1b|Asah2|Mad2l1|Gpr132|Smoc2|Rgcc|Ndc80|Cdt1|Cdca5|Ube2c|Spdl1|Tpx2|Gpsm2|Cul9|Gpnmb|Prcc|Nusap1|Ttc28|Mepce|Zc3h12d|Eme1|Ccnb1|Heca|Brsk1	-3.872615738
BP	GO:0045931	positive regulation of mitotic cell cycle	19_GO:0048518 positive regulation of biological process	-5.592029257	5.530315115	27	Abl1|Birc5|Cdc25b|Cdk1|Cdc7|Eif4ebp1|Hes1|Hspa2|Igf2|Il1b|Lmnb1|Pdgfb|Prkca|Sphk1|Aurkb|Ppp1r10|Usp2|Mad2l1|Smoc2|Rgcc|Ndc80|Cdt1|Cdca5|Ube2c|Nusap1|Mepce|Ccnb1	-3.429585905
BP	GO:1901987	regulation of cell cycle phase transition	19_GO:0050789 regulation of biological process	-4.841975094	4.830194535	37	Birc5|Bub1|Bub1b|Cdc25b|Cdk1|Cdc7|Cdkn1a|Cdkn1c|Cdkn2d|E2f1|Pdpn|Hspa2|Klf4|Lmnb1|Orc1|Plk1|Psme2|Slfn1|Sox4|Aurkb|Ttk|Tjp3|Mad2l1|Gpr132|Rgcc|Ndc80|Cdt1|Cdca5|Ube2c|Tcim|Spdl1|Gpnmb|Mepce|Zc3h12d|Ccnb1|Atp2b4|Brsk1	-2.852775158
BP	GO:0090068	positive regulation of cell cycle process	19_GO:0048518 positive regulation of biological process	-4.79051195	4.847161533	33	Birc5|Cdc25b|Cdk1|Cdc7|Cdk5r1|Cdkn1a|Ect2|Hspa2|Igf2|Il1b|Lmnb1|Orc1|Pdgfb|Rock2|Sox4|Sphk1|Plk4|Aurkb|Racgap1|Spag5|Mad2l1|Piwil2|Rpl23|Rgcc|Ndc80|Cdt1|Cdca5|Ube2c|Sfpq|Gpsm2|Nusap1|Mepce|Ccnb1	-2.812593025
BP	GO:1901990	regulation of mitotic cell cycle phase transition	19_GO:0050789 regulation of biological process	-4.765147491	4.815160731	34	Birc5|Bub1|Bub1b|Cdc25b|Cdk1|Cdc7|Cdkn1a|Cdkn1c|E2f1|Pdpn|Hspa2|Klf4|Lmnb1|Orc1|Plk1|Psme2|Slfn1|Sox4|Aurkb|Ttk|Tjp3|Mad2l1|Gpr132|Rgcc|Ndc80|Cdt1|Cdca5|Ube2c|Spdl1|Gpnmb|Mepce|Zc3h12d|Ccnb1|Brsk1	-2.80002975
BP	GO:0045840	positive regulation of mitotic nuclear division	19_GO:0071840 cellular component organization or biogenesis	-2.876738006	3.789885164	11	Birc5|Igf2|Il1b|Pdgfb|Sphk1|Aurkb|Rgcc|Cdt1|Cdca5|Ube2c|Nusap1	-1.352424869
BP	GO:0044843	cell cycle G1/S phase transition	19_GO:0009987 cellular process	-2.760921896	3.368059902	23	Ccna2|Ccne1|Cdkn1a|Cdkn2c|Cdkn2d|E2f1|Eif4ebp1|Pdpn|Klf4|Pole|Psme2|Slfn1|Sox4|Tjp3|Gpr132|Cables1|Rgcc|Tcim|Gpnmb|Tcf19|Mepce|Zc3h12d|Atp2b4	-1.270470075
BP	GO:0051785	positive regulation of nuclear division	19_GO:0071840 cellular component organization or biogenesis	-2.575338672	3.424273034	12	Birc5|Igf2|Il1b|Pdgfb|Sphk1|Aurkb|Piwil2|Rgcc|Cdt1|Cdca5|Ube2c|Nusap1	-1.143603724
BP	GO:0000082	G1/S transition of mitotic cell cycle	19_GO:0009987 cellular process	-2.250336659	2.915531889	20	Ccne1|Cdkn1a|Cdkn2c|Cdkn2d|E2f1|Eif4ebp1|Pdpn|Klf4|Pole|Psme2|Slfn1|Sox4|Tjp3|Gpr132|Cables1|Rgcc|Gpnmb|Tcf19|Mepce|Zc3h12d	-0.920235215
BP	GO:0042110	T cell activation	19_GO:0002376 immune system process	-14.29552561	9.180702647	79	Abl1|Adam8|Adora2a|Arg1|Arg2|Bax|Bcl2a1d|Cd2|Cd24a|Cd44|Cxcr4|Ccr2|Ccr7|Ctla2a|Efnb1|Egr1|Fanca|Fas|Fgl2|Flt3|Gja1|Lilrb4a|H2-Aa|H2-Ab1|Hes1|Hsp90aa1|Ifng|Igf2|Il1b|Il2ra|Il2rg|Itgax|Kit|Mafb|Lag3|Lck|Lgals1|Lgals3|Smad3|Smad7|Clec4d|Cd244a|Pla2g2d|Psen2|Slfn1|Sos1|Sox4|Zeb1|Tgfbr2|Cd27|Tnfsf9|Gadd45g|Tnfsf14|Clec4e|Zc3h8|Rsad2|Pdcd1lg2|Hs1bp3|Cd274|Prelid1|Vsir|Stx11|Il23a|Gpnmb|Gpr18|Cd209e|Hsh…	-10.43224679
BP	GO:0030155	regulation of cell adhesion	19_GO:0022610 biological adhesion	-14.17732159	8.913064215	98	Abl1|Macf1|Adam8|Adora2a|Angpt2|Apod|Arg1|Arg2|Ass1|Bst1|Cd24a|Cd44|Cd63|Cxcr4|Ccr2|Ccr7|Efna1|Efnb1|Dmtn|Epha2|Erbb3|Fgl2|Fn1|Fzd4|Gcnt2|Pdpn|Adgrg1|H2-Aa|H2-Ab1|Hes1|Hsp90aa1|Ifng|Igf2|Il1b|Il1rn|Il2ra|Il2rg|Itga5|Itgb1bp1|Jup|Klf4|Lag3|Lck|Lgals1|Lgals3|Smad3|Smad7|Cited2|Ninj1|Cd244a|Pde3b|Pik3r1|Prkca|Pla2g2d|S100a10|Slfn1|Sox4|Spp1|Stx3|Tgfbr2|Tgm2|Thbs1|Tjp1|Tnfrsf18|Cd27|Tnfsf9|Coro1c|Ets…	-10.43224679
BP	GO:0002521	leukocyte differentiation	19_GO:0002376 immune system process	-12.54462947	8.398653414	82	Abl1|Adam8|Bax|Bcl2a1d|Anxa2|Cd24a|Cd44|Ccr1|Ccr2|Ccr7|Csf1r|Csf3|Ctla2a|Egr1|Epha2|Fanca|Fas|Fgl2|Flt3|H2-Aa|H2-Ab1|Hells|Hmgb3|Hsp90aa1|Ifng|Il1b|Il2ra|Il2rg|Il3ra|Kit|Mafb|Lag3|Lck|Lgals1|Smad7|Mef2c|Mertk|Clec4d|Cited2|Nme1|Nme2|Pik3r1|Pirb|Prkca|Pla2g2d|Psen2|Sos1|Sox4|Zeb1|Tgfbr2|Cd27|Pglyrp1|Tnfsf9|Gadd45g|Tlr2|Clec4e|Tob2|Zc3h8|Rsad2|Hs1bp3|Prelid1|Ubash3b|Vsir|Ocstamp|Dcstamp|Hdac9|Fam20…	-9.200929043
BP	GO:0050863	regulation of T cell activation	19_GO:0002376 immune system process	-11.99320763	8.55565445	55	Abl1|Adam8|Adora2a|Arg1|Arg2|Cd24a|Cd44|Ccr2|Ccr7|Ctla2a|Efnb1|Fanca|Fgl2|H2-Aa|H2-Ab1|Hes1|Hsp90aa1|Ifng|Igf2|Il1b|Il2ra|Il2rg|Lag3|Lck|Lgals1|Lgals3|Smad7|Cd244a|Pla2g2d|Slfn1|Sos1|Sox4|Zeb1|Tgfbr2|Cd27|Tnfsf9|Tnfsf14|Zc3h8|Pdcd1lg2|Cd274|Prelid1|Vsir|Il23a|Gpnmb|Cd209e|Gsn|Ankle1|Zc3h12d|Tarm1|Rasal3|Sirpb1a|Gm5150|Sirpb1b|Gm9733|Sirpb1c	-8.725254091
BP	GO:0007159	leukocyte cell-cell adhesion	19_GO:0022610 biological adhesion	-11.90397075	8.472029223	57	Adam8|Adora2a|Arg1|Arg2|Ass1|Cd24a|Cd44|Ccr2|Ccr7|Efnb1|Fgl2|H2-Aa|H2-Ab1|Hes1|Hsp90aa1|Ifng|Igf2|Il1b|Il2ra|Il2rg|Itga5|Itgb7|Klf4|Lag3|Lck|Lgals1|Lgals3|Smad7|Cd244a|Pla2g2d|S100a8|S100a9|Sell|Selplg|Slfn1|Sox4|Tgfbr2|Cd27|Tnfsf9|Ets1|Tnfsf14|Zc3h8|Pdcd1lg2|Cd274|Vsir|Il23a|Gpnmb|Olr1|Cd209e|Zc3h12d|Tarm1|Rasal3|Sirpb1a|Gm5150|Sirpb1b|Gm9733|Sirpb1c	-8.670779317
BP	GO:0050865	regulation of cell activation	19_GO:0050789 regulation of biological process	-11.18195593	7.715173267	92	Abl1|Adam8|Adora2a|Adora2b|Arg1|Arg2|Bst1|Capn3|Cd24a|Cd38|Cd44|Cdkn1a|Ccr2|Ccr7|Cst7|Ctla2a|Efnb1|Dmtn|Fanca|Fas|Fgl2|Fgr|Flt3|Pdpn|H2-Aa|H2-Ab1|Hes1|Hmgb3|Hsp90aa1|Ifng|Igf2|Il1b|Il2ra|Il2rg|Lag3|Lck|Lgals1|Lgals3|Smad7|Mef2c|Mertk|Mif|Cd200|Clec4d|Cd244a|Pdgfb|Prkca|Pla2g2d|Slfn1|Sos1|Sox4|Sphk1|Zeb1|Tgfbr2|Thbs1|Cd40|Cd27|Pglyrp1|Tnfsf9|Plscr1|Nr1h3|Klrk1|Trp53bp1|Tnfsf14|Mfhas1|Tslp|Zc3h8|Pd…	-7.98094918
BP	GO:1903706	regulation of hemopoiesis	19_GO:0002376 immune system process	-10.91303732	7.896790326	63	Abl1|Adam8|Cd24a|Cd44|Ccr1|Ccr2|Ccr7|Csf1r|Csf3|Ctla2a|Fanca|Fas|Fgl2|Flt3|Cxcl1|H2-Aa|Hes1|Hmgb3|Hsp90aa1|Ifng|Il1b|Il2ra|Il2rg|Eif6|Mafb|Lag3|Lck|Smad7|Mef2c|Nme1|Nme2|Pik3r1|Pim1|Prkca|Scin|Sos1|Sox4|Zeb1|Tgfbr2|Cd27|Pglyrp1|Tnfsf9|Ets1|Tob2|Zc3h8|Prelid1|Nudt21|Tcim|Ubash3b|Vsir|Ocstamp|Dcstamp|Il23a|Clec2d|Slc9b2|Pilrb1|Fnip1|Gpr55|Gpr171|Ankle1|Inpp4b|N4bp2l2|Isg15	-7.811105264
BP	GO:0098609	cell-cell adhesion	19_GO:0022610 biological adhesion	-10.90296754	7.57810294	94	Abl1|Adam8|Adora2a|Aqp4|Arg1|Arg2|Arvcf|Ass1|Ctnnd1|Cd2|Cd24a|Cd44|Cdh15|Cdk5r1|Cfh|Ccr2|Ccr7|Efnb1|Emb|Dmtn|Fgl2|Fn1|Gcnt2|Pdpn|H2-Aa|H2-Ab1|Hes1|Hsp90aa1|Ifng|Igf2|Il1b|Il1rn|Il2ra|Il2rg|Itga5|Itgax|Itgb7|Jup|Kit|Klf4|Lag3|Rpsa|Lck|Lgals1|Lgals3|Lrp6|Cd93|Smad7|Cd200|Cited2|Cd244a|Pik3r1|Prkca|Pla2g2d|Ptprm|S100a8|S100a9|Sell|Selplg|Slfn1|Sox4|Tgfbr2|Tjp1|Cd27|Tnfsf9|Cdh23|Ets1|Slc7a11|Tjp3|Tnf…	-7.811105264
BP	GO:0002694	regulation of leukocyte activation	19_GO:0002376 immune system process	-10.37395442	7.401941299	86	Abl1|Adam8|Adora2a|Adora2b|Arg1|Arg2|Bst1|Cd24a|Cd38|Cd44|Cdkn1a|Ccr2|Ccr7|Cst7|Ctla2a|Efnb1|Fanca|Fas|Fgl2|Fgr|Flt3|H2-Aa|H2-Ab1|Hes1|Hmgb3|Hsp90aa1|Ifng|Igf2|Il1b|Il2ra|Il2rg|Lag3|Lck|Lgals1|Lgals3|Smad7|Mef2c|Mertk|Mif|Cd200|Clec4d|Cd244a|Pla2g2d|Slfn1|Sos1|Sox4|Sphk1|Zeb1|Tgfbr2|Thbs1|Cd40|Cd27|Pglyrp1|Tnfsf9|Plscr1|Nr1h3|Klrk1|Trp53bp1|Tnfsf14|Mfhas1|Tslp|Zc3h8|Pdcd1lg2|Cd274|Prelid1|Tnfsf13…	-7.369242323
BP	GO:1903037	regulation of leukocyte cell-cell adhesion	19_GO:0022610 biological adhesion	-10.18317597	7.754359951	50	Adam8|Adora2a|Arg1|Arg2|Ass1|Cd24a|Cd44|Ccr2|Ccr7|Efnb1|Fgl2|H2-Aa|H2-Ab1|Hes1|Hsp90aa1|Ifng|Igf2|Il1b|Il2ra|Il2rg|Klf4|Lag3|Lck|Lgals1|Lgals3|Smad7|Cd244a|Pla2g2d|Slfn1|Sox4|Tgfbr2|Cd27|Tnfsf9|Ets1|Tnfsf14|Zc3h8|Pdcd1lg2|Cd274|Vsir|Il23a|Gpnmb|Cd209e|Zc3h12d|Tarm1|Rasal3|Sirpb1a|Gm5150|Sirpb1b|Gm9733|Sirpb1c	-7.216252425
BP	GO:0022407	regulation of cell-cell adhesion	19_GO:0022610 biological adhesion	-9.956475646	7.459789126	61	Abl1|Adam8|Adora2a|Arg1|Arg2|Ass1|Cd24a|Cd44|Ccr2|Ccr7|Efnb1|Dmtn|Fgl2|Gcnt2|Pdpn|H2-Aa|H2-Ab1|Hes1|Hsp90aa1|Ifng|Igf2|Il1b|Il1rn|Il2ra|Il2rg|Klf4|Lag3|Lck|Lgals1|Lgals3|Smad7|Cited2|Cd244a|Pik3r1|Prkca|Pla2g2d|Slfn1|Sox4|Tgfbr2|Tjp1|Cd27|Tnfsf9|Ets1|Tnfsf14|Zc3h8|Pdcd1lg2|Cd274|Rgcc|Ubash3b|Vsir|Il23a|Gpnmb|Cd209e|Zc3h12d|Tarm1|Rasal3|Sirpb1a|Gm5150|Sirpb1b|Gm9733|Sirpb1c	-7.049186948
BP	GO:0045785	positive regulation of cell adhesion	19_GO:0022610 biological adhesion	-9.585110233	7.275145299	61	Abl1|Adam8|Cd24a|Cd44|Cd63|Ccr2|Ccr7|Efnb1|Dmtn|Fn1|Gcnt2|Pdpn|Adgrg1|H2-Aa|H2-Ab1|Hes1|Hsp90aa1|Ifng|Igf2|Il1b|Il2ra|Il2rg|Itga5|Itgb1bp1|Jup|Lck|Lgals1|Smad3|Smad7|Cited2|Ninj1|Cd244a|Prkca|S100a10|Sox4|Spp1|Stx3|Tgfbr2|Tgm2|Thbs1|Tjp1|Tnfrsf18|Cd27|Tnfsf9|Ets1|Tnfsf14|Net1|Pdcd1lg2|Cd274|Smoc2|P2ry12|Vsir|Il23a|Cd209e|Prex1|Rasal3|Sirpb1a|Gm5150|Sirpb1b|Gm9733|Sirpb1c	-6.729337144
BP	GO:1902105	regulation of leukocyte differentiation	19_GO:0002376 immune system process	-9.529362069	7.432303833	49	Abl1|Adam8|Cd24a|Cd44|Ccr1|Ccr2|Ccr7|Csf1r|Ctla2a|Fanca|Fas|Fgl2|Flt3|H2-Aa|Hmgb3|Hsp90aa1|Ifng|Il1b|Il2ra|Il2rg|Mafb|Lag3|Lck|Smad7|Nme1|Nme2|Pik3r1|Prkca|Sos1|Sox4|Zeb1|Tgfbr2|Cd27|Pglyrp1|Tnfsf9|Tob2|Zc3h8|Prelid1|Ubash3b|Vsir|Ocstamp|Dcstamp|Il23a|Clec2d|Slc9b2|Pilrb1|Gpr55|Ankle1|Inpp4b	-6.687377264
BP	GO:0051249	regulation of lymphocyte activation	19_GO:0002376 immune system process	-9.010966654	6.86507993	73	Abl1|Adam8|Adora2a|Arg1|Arg2|Bst1|Cd24a|Cd38|Cd44|Cdkn1a|Ccr2|Ccr7|Ctla2a|Efnb1|Fanca|Fas|Fgl2|Fgr|Flt3|H2-Aa|H2-Ab1|Hes1|Hmgb3|Hsp90aa1|Ifng|Igf2|Il1b|Il2ra|Il2rg|Lag3|Lck|Lgals1|Lgals3|Smad7|Mef2c|Mertk|Mif|Cd244a|Pla2g2d|Slfn1|Sos1|Sox4|Zeb1|Tgfbr2|Cd40|Cd27|Pglyrp1|Tnfsf9|Trp53bp1|Tnfsf14|Zc3h8|Pdcd1lg2|Cd274|Prelid1|Tnfsf13|Vsir|Shld2|Il23a|Gpnmb|Cd209e|Gsn|Kmt5c|Ankle1|Zc3h12d|Bank1|Tarm1|R…	-6.232033596
BP	GO:0070661	leukocyte proliferation	19_GO:0008283 cell proliferation	-8.484918219	6.856587031	50	Abl1|Arg1|Arg2|Bax|Bst1|Cd24a|Cd38|Cd44|Cdkn1a|Cxcr4|Ccr2|Ccr7|Csf1r|Efnb1|Flt3|Gja1|Lilrb4a|H2-Aa|H2-Ab1|Hells|Hes1|Ifng|Igf2|Il1b|Il2ra|Itgax|Lgals3|Mef2c|Mif|Cd244a|Pla2g2d|Slfn1|Sos1|Tgfbr2|Cd40|Cd27|Tnfsf9|Pdcd1lg2|Cd274|Vsir|Ocstamp|Il33|Il23a|Gpnmb|Cd209e|Plcl2|Zc3h12d|Tarm1|Rasal3|Gm13283	-5.800541268
BP	GO:0030098	lymphocyte differentiation	19_GO:0002376 immune system process	-8.385486208	6.720486519	56	Abl1|Adam8|Bax|Bcl2a1d|Cd24a|Cd44|Ccr2|Ccr7|Ctla2a|Egr1|Fanca|Fas|Fgl2|Flt3|H2-Aa|H2-Ab1|Hells|Hmgb3|Hsp90aa1|Ifng|Il1b|Il2ra|Il2rg|Kit|Mafb|Lag3|Lck|Lgals1|Smad7|Mertk|Clec4d|Pik3r1|Pla2g2d|Sos1|Sox4|Zeb1|Tgfbr2|Cd27|Pglyrp1|Tnfsf9|Gadd45g|Clec4e|Zc3h8|Rsad2|Hs1bp3|Prelid1|Vsir|Hdac9|Il23a|Gpr18|Dock10|Fnip1|Plcl2|Ankle1|Prex1|Gm13283	-5.73732143
BP	GO:0046651	lymphocyte proliferation	19_GO:0008283 cell proliferation	-8.289972083	6.797754631	47	Abl1|Arg1|Arg2|Bax|Bst1|Cd24a|Cd38|Cd44|Cdkn1a|Cxcr4|Ccr2|Ccr7|Efnb1|Flt3|Gja1|Lilrb4a|H2-Aa|H2-Ab1|Hells|Hes1|Ifng|Igf2|Il1b|Il2ra|Itgax|Lgals3|Mef2c|Mif|Cd244a|Pla2g2d|Slfn1|Sos1|Tgfbr2|Cd40|Cd27|Tnfsf9|Pdcd1lg2|Cd274|Vsir|Il23a|Gpnmb|Cd209e|Plcl2|Zc3h12d|Tarm1|Rasal3|Gm13283	-5.650407476
BP	GO:0032943	mononuclear cell proliferation	19_GO:0008283 cell proliferation	-8.157571535	6.724231204	47	Abl1|Arg1|Arg2|Bax|Bst1|Cd24a|Cd38|Cd44|Cdkn1a|Cxcr4|Ccr2|Ccr7|Efnb1|Flt3|Gja1|Lilrb4a|H2-Aa|H2-Ab1|Hells|Hes1|Ifng|Igf2|Il1b|Il2ra|Itgax|Lgals3|Mef2c|Mif|Cd244a|Pla2g2d|Slfn1|Sos1|Tgfbr2|Cd40|Cd27|Tnfsf9|Pdcd1lg2|Cd274|Vsir|Il23a|Gpnmb|Cd209e|Plcl2|Zc3h12d|Tarm1|Rasal3|Gm13283	-5.53242971
BP	GO:0042098	T cell proliferation	19_GO:0008283 cell proliferation	-7.967731915	6.838867631	36	Abl1|Arg1|Arg2|Bax|Cd24a|Cd44|Cxcr4|Ccr2|Ccr7|Efnb1|Gja1|Lilrb4a|H2-Aa|H2-Ab1|Hes1|Ifng|Igf2|Il1b|Il2ra|Itgax|Lgals3|Cd244a|Pla2g2d|Slfn1|Sos1|Tgfbr2|Tnfsf9|Pdcd1lg2|Cd274|Vsir|Il23a|Gpnmb|Cd209e|Zc3h12d|Tarm1|Rasal3	-5.376471988
BP	GO:0022409	positive regulation of cell-cell adhesion	19_GO:0022610 biological adhesion	-7.88845551	6.679160305	41	Adam8|Cd24a|Cd44|Ccr2|Ccr7|Efnb1|Dmtn|Gcnt2|Pdpn|H2-Aa|H2-Ab1|Hes1|Hsp90aa1|Ifng|Igf2|Il1b|Il2ra|Il2rg|Lck|Lgals1|Smad7|Cited2|Cd244a|Sox4|Tgfbr2|Tjp1|Cd27|Tnfsf9|Ets1|Tnfsf14|Pdcd1lg2|Cd274|Vsir|Il23a|Cd209e|Rasal3|Sirpb1a|Gm5150|Sirpb1b|Gm9733|Sirpb1c	-5.304748721
BP	GO:0070663	regulation of leukocyte proliferation	19_GO:0008283 cell proliferation	-7.587612849	6.542913999	39	Arg1|Arg2|Bst1|Cd24a|Cd38|Cd44|Cdkn1a|Ccr2|Ccr7|Csf1r|Efnb1|H2-Aa|H2-Ab1|Hes1|Ifng|Igf2|Il1b|Il2ra|Lgals3|Mef2c|Mif|Cd244a|Pla2g2d|Slfn1|Sos1|Tgfbr2|Cd40|Tnfsf9|Pdcd1lg2|Cd274|Vsir|Ocstamp|Il33|Il23a|Gpnmb|Cd209e|Zc3h12d|Tarm1|Rasal3	-5.072986979
BP	GO:0030217	T cell differentiation	19_GO:0002376 immune system process	-7.44057668	6.399048671	42	Abl1|Adam8|Bcl2a1d|Cd44|Ccr2|Ccr7|Ctla2a|Egr1|Fanca|Fas|Fgl2|Flt3|H2-Aa|Hsp90aa1|Ifng|Il1b|Il2ra|Il2rg|Kit|Mafb|Lag3|Lck|Smad7|Clec4d|Pla2g2d|Sos1|Sox4|Zeb1|Tgfbr2|Cd27|Tnfsf9|Gadd45g|Clec4e|Zc3h8|Rsad2|Hs1bp3|Prelid1|Vsir|Il23a|Gpr18|Ankle1|Prex1	-4.950774394
BP	GO:0045619	regulation of lymphocyte differentiation	19_GO:0002376 immune system process	-7.423932086	6.585193904	33	Abl1|Adam8|Cd24a|Cd44|Ccr2|Ccr7|Ctla2a|Fanca|Fas|Fgl2|Flt3|H2-Aa|Hmgb3|Hsp90aa1|Ifng|Il1b|Il2ra|Il2rg|Lag3|Lck|Smad7|Sos1|Sox4|Zeb1|Tgfbr2|Cd27|Pglyrp1|Tnfsf9|Zc3h8|Prelid1|Vsir|Il23a|Ankle1	-4.940120163
BP	GO:0050870	positive regulation of T cell activation	19_GO:0022610 biological adhesion	-7.15177777	6.414348612	33	Adam8|Cd24a|Ccr2|Ccr7|Efnb1|H2-Aa|H2-Ab1|Hes1|Hsp90aa1|Ifng|Igf2|Il1b|Il2ra|Il2rg|Lck|Lgals1|Cd244a|Sox4|Tgfbr2|Cd27|Tnfsf9|Tnfsf14|Pdcd1lg2|Cd274|Vsir|Il23a|Cd209e|Rasal3|Sirpb1a|Gm5150|Sirpb1b|Gm9733|Sirpb1c	-4.707732974
BP	GO:0050670	regulation of lymphocyte proliferation	19_GO:0008283 cell proliferation	-7.088539952	6.303993756	36	Arg1|Arg2|Bst1|Cd24a|Cd38|Cd44|Cdkn1a|Ccr2|Ccr7|Efnb1|H2-Aa|H2-Ab1|Hes1|Ifng|Igf2|Il1b|Il2ra|Lgals3|Mef2c|Mif|Cd244a|Pla2g2d|Slfn1|Sos1|Tgfbr2|Cd40|Tnfsf9|Pdcd1lg2|Cd274|Vsir|Il23a|Gpnmb|Cd209e|Zc3h12d|Tarm1|Rasal3	-4.658577603
BP	GO:1903039	positive regulation of leukocyte cell-cell adhesion	19_GO:0022610 biological adhesion	-7.086634294	6.325048032	35	Adam8|Cd24a|Cd44|Ccr2|Ccr7|Efnb1|H2-Aa|H2-Ab1|Hes1|Hsp90aa1|Ifng|Igf2|Il1b|Il2ra|Il2rg|Lck|Lgals1|Cd244a|Sox4|Tgfbr2|Cd27|Tnfsf9|Ets1|Tnfsf14|Pdcd1lg2|Cd274|Vsir|Il23a|Cd209e|Rasal3|Sirpb1a|Gm5150|Sirpb1b|Gm9733|Sirpb1c	-4.658577603
BP	GO:0032944	regulation of mononuclear cell proliferation	19_GO:0008283 cell proliferation	-6.944210581	6.214612533	36	Arg1|Arg2|Bst1|Cd24a|Cd38|Cd44|Cdkn1a|Ccr2|Ccr7|Efnb1|H2-Aa|H2-Ab1|Hes1|Ifng|Igf2|Il1b|Il2ra|Lgals3|Mef2c|Mif|Cd244a|Pla2g2d|Slfn1|Sos1|Tgfbr2|Cd40|Tnfsf9|Pdcd1lg2|Cd274|Vsir|Il23a|Gpnmb|Cd209e|Zc3h12d|Tarm1|Rasal3	-4.53659505
BP	GO:0042129	regulation of T cell proliferation	19_GO:0008283 cell proliferation	-6.937255387	6.359402314	30	Arg1|Arg2|Cd24a|Cd44|Ccr2|Ccr7|Efnb1|H2-Aa|H2-Ab1|Hes1|Ifng|Igf2|Il1b|Il2ra|Lgals3|Cd244a|Pla2g2d|Slfn1|Sos1|Tgfbr2|Tnfsf9|Pdcd1lg2|Cd274|Vsir|Il23a|Gpnmb|Cd209e|Zc3h12d|Tarm1|Rasal3	-4.534603276
BP	GO:0045580	regulation of T cell differentiation	19_GO:0002376 immune system process	-6.595204038	6.193320094	28	Abl1|Adam8|Cd44|Ccr2|Ccr7|Ctla2a|Fanca|Fgl2|H2-Aa|Hsp90aa1|Ifng|Il1b|Il2ra|Il2rg|Lag3|Lck|Smad7|Sos1|Sox4|Zeb1|Tgfbr2|Cd27|Tnfsf9|Zc3h8|Prelid1|Vsir|Il23a|Ankle1	-4.252390629
BP	GO:0070665	positive regulation of leukocyte proliferation	19_GO:0008283 cell proliferation	-5.552067947	5.55763619	25	Bst1|Cd24a|Cd38|Cdkn1a|Ccr2|Ccr7|Csf1r|Efnb1|Hes1|Ifng|Igf2|Il1b|Il2ra|Mef2c|Mif|Cd244a|Tgfbr2|Cd40|Tnfsf9|Pdcd1lg2|Cd274|Ocstamp|Il23a|Cd209e|Rasal3	-3.398057763
BP	GO:0050867	positive regulation of cell activation	19_GO:0048518 positive regulation of biological process	-5.335540941	4.990284311	55	Adam8|Adora2b|Bst1|Capn3|Cd24a|Cd38|Cdkn1a|Ccr2|Ccr7|Efnb1|Dmtn|Fgr|Pdpn|H2-Aa|H2-Ab1|Hes1|Hsp90aa1|Ifng|Igf2|Il1b|Il2ra|Il2rg|Lck|Lgals1|Mef2c|Mif|Clec4d|Cd244a|Pdgfb|Sox4|Tgfbr2|Thbs1|Cd40|Cd27|Tnfsf9|Klrk1|Trp53bp1|Tnfsf14|Tslp|Pdcd1lg2|Cd274|Tnfsf13|Vsir|Shld2|Il33|Il23a|Cd209e|Kmt5c|Rasal3|Sirpb1a|Gm5150|Tnfsfm13|Sirpb1b|Gm9733|Sirpb1c	-3.223934605
BP	GO:0050671	positive regulation of lymphocyte proliferation	19_GO:0008283 cell proliferation	-5.258585508	5.403561707	23	Bst1|Cd24a|Cd38|Cdkn1a|Ccr2|Ccr7|Efnb1|Hes1|Ifng|Igf2|Il1b|Il2ra|Mef2c|Mif|Cd244a|Tgfbr2|Cd40|Tnfsf9|Pdcd1lg2|Cd274|Il23a|Cd209e|Rasal3	-3.16672323
BP	GO:0032946	positive regulation of mononuclear cell proliferation	19_GO:0008283 cell proliferation	-5.151018339	5.322692913	23	Bst1|Cd24a|Cd38|Cdkn1a|Ccr2|Ccr7|Efnb1|Hes1|Ifng|Igf2|Il1b|Il2ra|Mef2c|Mif|Cd244a|Tgfbr2|Cd40|Tnfsf9|Pdcd1lg2|Cd274|Il23a|Cd209e|Rasal3	-3.098349782
BP	GO:0002696	positive regulation of leukocyte activation	19_GO:0002376 immune system process	-4.514552561	4.486345383	51	Adam8|Adora2b|Bst1|Cd24a|Cd38|Cdkn1a|Ccr2|Ccr7|Efnb1|Fgr|H2-Aa|H2-Ab1|Hes1|Hsp90aa1|Ifng|Igf2|Il1b|Il2ra|Il2rg|Lck|Lgals1|Mef2c|Mif|Clec4d|Cd244a|Sox4|Tgfbr2|Thbs1|Cd40|Cd27|Tnfsf9|Klrk1|Trp53bp1|Tnfsf14|Tslp|Pdcd1lg2|Cd274|Tnfsf13|Vsir|Shld2|Il33|Il23a|Cd209e|Kmt5c|Rasal3|Sirpb1a|Gm5150|Tnfsfm13|Sirpb1b|Gm9733|Sirpb1c	-2.601986682
BP	GO:1903708	positive regulation of hemopoiesis	19_GO:0002376 immune system process	-4.258985355	4.519331562	29	Adam8|Ccr1|Ccr2|Ccr7|Csf1r|Csf3|Cxcl1|H2-Aa|Hsp90aa1|Ifng|Il1b|Il2ra|Il2rg|Lck|Prkca|Scin|Sox4|Tgfbr2|Cd27|Tnfsf9|Ets1|Nudt21|Vsir|Ocstamp|Dcstamp|Il23a|Slc9b2|N4bp2l2|Isg15	-2.404847799
BP	GO:0042102	positive regulation of T cell proliferation	19_GO:0022610 biological adhesion	-4.160372971	4.737568431	17	Cd24a|Ccr2|Ccr7|Efnb1|Hes1|Ifng|Igf2|Il1b|Il2ra|Cd244a|Tgfbr2|Tnfsf9|Pdcd1lg2|Cd274|Il23a|Cd209e|Rasal3	-2.330434086
BP	GO:0051251	positive regulation of lymphocyte activation	19_GO:0002376 immune system process	-3.914240687	4.112840329	44	Adam8|Bst1|Cd24a|Cd38|Cdkn1a|Ccr2|Ccr7|Efnb1|H2-Aa|H2-Ab1|Hes1|Hsp90aa1|Ifng|Igf2|Il1b|Il2ra|Il2rg|Lck|Lgals1|Mef2c|Mif|Cd244a|Sox4|Tgfbr2|Cd40|Cd27|Tnfsf9|Trp53bp1|Tnfsf14|Pdcd1lg2|Cd274|Tnfsf13|Vsir|Shld2|Il23a|Cd209e|Kmt5c|Rasal3|Sirpb1a|Gm5150|Tnfsfm13|Sirpb1b|Gm9733|Sirpb1c	-2.151437129
BP	GO:0045582	positive regulation of T cell differentiation	19_GO:0022610 biological adhesion	-3.533211162	4.219599623	16	Adam8|Ccr2|Ccr7|H2-Aa|Hsp90aa1|Ifng|Il1b|Il2ra|Il2rg|Lck|Sox4|Tgfbr2|Cd27|Tnfsf9|Vsir|Il23a	-1.867317617
BP	GO:1902107	positive regulation of leukocyte differentiation	19_GO:0002376 immune system process	-3.037745318	3.632052245	22	Adam8|Ccr1|Ccr2|Ccr7|Csf1r|H2-Aa|Hsp90aa1|Ifng|Il1b|Il2ra|Il2rg|Lck|Prkca|Sox4|Tgfbr2|Cd27|Tnfsf9|Vsir|Ocstamp|Dcstamp|Il23a|Slc9b2	-1.478778906
BP	GO:0045621	positive regulation of lymphocyte differentiation	19_GO:0002376 immune system process	-2.865659817	3.593658608	16	Adam8|Ccr2|Ccr7|H2-Aa|Hsp90aa1|Ifng|Il1b|Il2ra|Il2rg|Lck|Sox4|Tgfbr2|Cd27|Tnfsf9|Vsir|Il23a	-1.34847173
BP	GO:0051301	cell division	19_GO:0009987 cellular process	-13.55733184	8.806840963	84	Birc5|Rhob|Bub1|Bub1b|Aspm|Ccna2|Ccnb2|Ccne1|Ccnf|Cdc25b|Cdk1|Cdc7|Cenpa|Ect2|Epb41l2|Evi5|Cdca3|Hells|Hmga2|Igf2|Il1b|Itgb1bp1|Kit|Lrp6|Nek2|Numb|Pdgfb|Pgf|Plk1|Ppp1ca|Pstpip1|Kif20a|Ran|Rock2|Plk4|Aurkb|Aurka|Tacc3|Timeless|Nek3|Racgap1|Knstrn|Cdca8|Cks1b|Spag5|Mad2l1|Cables1|Cenpw|Spc25|Ska1|Nuf2|Pmf1|Ndc80|Cdt1|Spc24|Cdca5|Spire1|Ube2c|Anln|Spdl1|Oip5|Syce2|Ist1|Sapcd2|Tpx2|Sgo1|Tppp|Kif2c|Ce…	-9.988348309
CC	GO:0000776	kinetochore		-10.99864628	8.777001569	32	Birc5|Bub1|Bub1b|Cenpa|Nek2|Plk1|Psen2|Aurkb|Ttk|Trp53bp1|Knstrn|Spag5|Mad2l1|Cenpk|Cenpw|Spc25|Ska1|Cenpm|Nuf2|Pmf1|Ndc80|Cdt1|Spc24|Spdl1|Cenpn|Sgo1|Kif2c|Clasp2|Kansl1|Cenpi|Mis18bp1|Ccnb1	-7.841626346
CC	GO:0000775	chromosome, centromeric region		-9.872051766	7.887188073	38	Birc5|Bub1|Bub1b|Cenpa|Dnmt3a|Hells|Nek2|Plk1|Psen2|Aurkb|Aurka|Ttk|Trp53bp1|Knstrn|Cdca8|Spag5|Mad2l1|Cenpk|Cenpw|Spc25|Ska1|Cenpm|Nuf2|Pmf1|Ndc80|Cdt1|Spc24|Spdl1|Oip5|Cenpn|Sgo1|Kif2c|Clasp2|Kansl1|Cenpi|Mis18bp1|Kmt5c|Ccnb1	-7.002038238
BP	GO:0000280	nuclear division	19_GO:0071840 cellular component organization or biogenesis	-8.925237492	6.978006769	58	Birc5|Bub1|Bub1b|Aspm|Ccne1|Cdc25b|Cdkn1c|Ddx4|Fanca|Hspa2|Igf2|Il1b|Nek2|Osm|Pdgfb|Plk1|Psmc3ip|Rad51|Ran|Sphk1|Aurkb|Aurka|Tacc3|Ttk|Psmd13|Racgap1|Knstrn|Cdca8|Spag5|Mad2l1|Piwil2|Cenpk|Fignl1|Rgcc|Nuf2|Ndc80|Cdt1|Cdca5|Spire1|Ube2c|Spdl1|Syce2|Tpx2|Sgo1|Kif2c|Ncapg2|Clasp2|Cul9|Tex15|Cdc20|Nusap1|Kif22|Chtf18|Tasor|Prc1|Ofd1|Eme1|Ccnb1	-6.157886306
CC	GO:0098687	chromosomal region		-8.746890072	7.049028545	47	Birc5|Bub1|Bub1b|Cenpa|Dnmt3a|Hells|Nek2|Orc1|Plk1|Ppp1ca|Psen2|Rad51|Aurkb|Aurka|Tep1|Ttk|Wrn|Trp53bp1|Knstrn|Ppp1r10|Cdca8|Spag5|Mad2l1|Piwil2|Cenpk|Cenpw|Spc25|Ska1|Cenpm|Nuf2|Pmf1|Ndc80|Cdt1|Spc24|Spdl1|Oip5|Cenpn|Sgo1|Kif2c|Clasp2|Kansl1|Cenpi|Mis18bp1|Kmt5c|Ccnb1|Lrif1|Dna2	-6.001815281
CC	GO:0000779	condensed chromosome, centromeric region		-8.664735927	8.257868654	18	Birc5|Bub1|Bub1b|Cenpa|Plk1|Aurkb|Aurka|Cenpk|Spc25|Ska1|Nuf2|Pmf1|Ndc80|Spdl1|Sgo1|Mis18bp1|Kmt5c|Ccnb1	-5.951069599
CC	GO:0000780	condensed nuclear chromosome, centromeric region		-8.401093028	8.586757534	14	Bub1|Bub1b|Cenpa|Plk1|Aurkb|Aurka|Cenpk|Nuf2|Pmf1|Ndc80|Sgo1|Mis18bp1|Kmt5c|Ccnb1	-5.744154325
BP	GO:0048285	organelle fission	19_GO:0071840 cellular component organization or biogenesis	-8.155288623	6.542631091	61	Birc5|Bub1|Bub1b|Aspm|Ccne1|Cdc25b|Cdkn1c|Ddx4|Fanca|Lpin1|Hspa2|Igf2|Il1b|Nek2|Osm|Pdgfb|Plk1|Psmc3ip|Rad51|Ran|Sphk1|Aurkb|Aurka|Tacc3|Ttk|Psmd13|Racgap1|Knstrn|Cdca8|Spag5|Mad2l1|Mtch2|Piwil2|Cenpk|Fignl1|Rgcc|Nuf2|Ndc80|Cdt1|Cdca5|Spire1|Ube2c|Spdl1|Inf2|Syce2|Tpx2|Sgo1|Kif2c|Ncapg2|Clasp2|Cul9|Tex15|Cdc20|Nusap1|Kif22|Chtf18|Tasor|Prc1|Ofd1|Eme1|Ccnb1	-5.53242971
CC	GO:0000777	condensed chromosome kinetochore		-8.028978041	8.269605156	14	Birc5|Bub1|Bub1b|Cenpa|Plk1|Cenpk|Spc25|Ska1|Nuf2|Pmf1|Ndc80|Spdl1|Mis18bp1|Ccnb1	-5.430031285
CC	GO:0000778	condensed nuclear chromosome kinetochore		-7.868822664	8.961671484	10	Bub1|Bub1b|Cenpa|Plk1|Cenpk|Nuf2|Pmf1|Ndc80|Mis18bp1|Ccnb1	-5.292539893
BP	GO:0000070	mitotic sister chromatid segregation	19_GO:0071840 cellular component organization or biogenesis	-7.719196397	6.898931408	29	Birc5|Bub1|Bub1b|Nek2|Plk1|Ran|Aurkb|Tacc3|Ttk|Racgap1|Knstrn|Cdca8|Spag5|Mad2l1|Cenpk|Nuf2|Ndc80|Cdt1|Cdca5|Ube2c|Spdl1|Sgo1|Kif2c|Ncapg2|Cdc20|Nusap1|Kif22|Prc1|Ccnb1	-5.171402164
BP	GO:0140014	mitotic nuclear division	19_GO:0071840 cellular component organization or biogenesis	-7.652042467	6.54127722	41	Birc5|Bub1|Bub1b|Cdkn1c|Igf2|Il1b|Nek2|Pdgfb|Plk1|Ran|Sphk1|Aurkb|Aurka|Tacc3|Ttk|Racgap1|Knstrn|Cdca8|Spag5|Mad2l1|Cenpk|Rgcc|Nuf2|Ndc80|Cdt1|Cdca5|Ube2c|Spdl1|Tpx2|Sgo1|Kif2c|Ncapg2|Clasp2|Cul9|Cdc20|Nusap1|Kif22|Tasor|Prc1|Ofd1|Ccnb1	-5.130982487
BP	GO:0051983	regulation of chromosome segregation	19_GO:0050789 regulation of biological process	-7.466273491	6.996825572	23	Birc5|Bub1|Bub1b|Ect2|Nek2|Plk1|Aurkb|Tacc3|Ttk|Racgap1|Knstrn|Spag5|Mad2l1|Rad18|Ndc80|Cdt1|Cdca5|Ube2c|Spdl1|Sfpq|Kif2c|Chtf18|Ccnb1	-4.970397057
BP	GO:0007059	chromosome segregation	19_GO:0009987 cellular process	-7.061213539	6.128922624	45	Birc5|Bub1|Bub1b|Ccne1|Ect2|Nek2|Plk1|Ran|Aurkb|Tacc3|Ttk|Racgap1|Knstrn|Cdca8|Spag5|Mad2l1|Rad18|Cenpk|Cenpw|Spc25|Ska1|Nuf2|Pmf1|Ndc80|Cdt1|Cdca5|Ciao2a|Ube2c|Spdl1|Oip5|Sfpq|Syce2|Cenpn|Sgo1|Kif2c|Ncapg2|Tex15|Cdc20|Nusap1|Cdca2|Kif22|Chtf18|Prc1|Eme1|Ccnb1	-4.638358042
BP	GO:0008608	attachment of spindle microtubules to kinetochore	19_GO:0009987 cellular process	-6.914027072	7.608347533	12	Ect2|Nek2|Aurkb|Racgap1|Knstrn|Spag5|Nuf2|Ndc80|Cdt1|Sgo1|Kif2c|Ccnb1	-4.516282296
BP	GO:0045786	negative regulation of cell cycle	19_GO:0048519 negative regulation of biological process	-6.597894475	5.744911011	55	Abl1|Birc5|Rhob|Bub1|Bub1b|Ccnf|Cdk1|Cdk5r1|Cdkn1a|Cdkn1c|Cdkn2c|Cdkn2d|Ddit3|E2f1|Hpgd|Ifng|Klf4|Smad3|Mif|Nek2|Orc1|Osm|Plk1|Prox1|Slfn1|Sox4|Aurkb|Aurka|Thbs1|Timeless|Ttk|Ets1|Nubp1|Trp53bp1|Bin1|Ppp1r10|Mad2l1|Gpr132|Gmnn|Rpl23|Rgcc|Ndc80|Cdt1|Etaa1|Spdl1|Cdkn3|Gpnmb|Prcc|Hexim1|Zc3h12d|Eme1|Ccnb1|Dna2|Heca|Brsk1	-4.252390629
BP	GO:0000819	sister chromatid segregation	19_GO:0071840 cellular component organization or biogenesis	-6.4993348	6.071582531	30	Birc5|Bub1|Bub1b|Nek2|Plk1|Ran|Aurkb|Tacc3|Ttk|Racgap1|Knstrn|Cdca8|Spag5|Mad2l1|Cenpk|Nuf2|Ndc80|Cdt1|Cdca5|Ube2c|Spdl1|Sfpq|Sgo1|Kif2c|Ncapg2|Cdc20|Nusap1|Kif22|Prc1|Ccnb1	-4.169233356
BP	GO:0031577	spindle checkpoint	19_GO:0048519 negative regulation of biological process	-5.711128615	6.489952183	12	Birc5|Bub1|Bub1b|Plk1|Aurkb|Aurka|Ttk|Mad2l1|Ndc80|Cdt1|Spdl1|Ccnb1	-3.520651223
BP	GO:0051988	regulation of attachment of spindle microtubules to kinetochore	19_GO:0050789 regulation of biological process	-5.523078886	7.352981374	7	Ect2|Nek2|Aurkb|Racgap1|Knstrn|Spag5|Ccnb1	-3.37460119
BP	GO:0007094	mitotic spindle assembly checkpoint	19_GO:0048519 negative regulation of biological process	-5.369638333	6.29811277	11	Birc5|Bub1|Bub1b|Plk1|Aurkb|Ttk|Mad2l1|Ndc80|Cdt1|Spdl1|Ccnb1	-3.250390255
BP	GO:0071173	spindle assembly checkpoint	19_GO:0048519 negative regulation of biological process	-5.369638333	6.29811277	11	Birc5|Bub1|Bub1b|Plk1|Aurkb|Ttk|Mad2l1|Ndc80|Cdt1|Spdl1|Ccnb1	-3.250390255
BP	GO:0098813	nuclear chromosome segregation	19_GO:0009987 cellular process	-5.237469651	5.127383904	35	Birc5|Bub1|Bub1b|Ccne1|Ect2|Nek2|Plk1|Ran|Aurkb|Tacc3|Ttk|Racgap1|Knstrn|Cdca8|Spag5|Mad2l1|Cenpk|Nuf2|Ndc80|Cdt1|Cdca5|Ube2c|Spdl1|Sfpq|Syce2|Sgo1|Kif2c|Ncapg2|Tex15|Cdc20|Nusap1|Kif22|Prc1|Eme1|Ccnb1	-3.162176474
BP	GO:0071174	mitotic spindle checkpoint	19_GO:0048519 negative regulation of biological process	-5.115213044	6.049258243	11	Birc5|Bub1|Bub1b|Plk1|Aurkb|Ttk|Mad2l1|Ndc80|Cdt1|Spdl1|Ccnb1	-3.07342963
CC	GO:0000940	condensed chromosome outer kinetochore		-4.994423227	6.716459597	7	Bub1|Bub1b|Plk1|Ska1|Ndc80|Spdl1|Ccnb1	-2.985744938
CC	GO:0000942	condensed nuclear chromosome outer kinetochore		-4.924248875	8.001617728	4	Bub1|Plk1|Ndc80|Ccnb1	-2.921506365
BP	GO:0045841	negative regulation of mitotic metaphase/anaphase transition	19_GO:0048519 negative regulation of biological process	-4.878824556	5.817253142	11	Birc5|Bub1|Bub1b|Plk1|Aurkb|Ttk|Mad2l1|Ndc80|Cdt1|Spdl1|Ccnb1	-2.883872292
BP	GO:0051985	negative regulation of chromosome segregation	19_GO:0048519 negative regulation of biological process	-4.805238597	5.636675641	12	Birc5|Bub1|Bub1b|Plk1|Aurkb|Ttk|Mad2l1|Ndc80|Cdt1|Spdl1|Chtf18|Ccnb1	-2.821715794
BP	GO:1902100	negative regulation of metaphase/anaphase transition of cell cycle	19_GO:0048519 negative regulation of biological process	-4.766735701	5.706936694	11	Birc5|Bub1|Bub1b|Plk1|Aurkb|Ttk|Mad2l1|Ndc80|Cdt1|Spdl1|Ccnb1	-2.80002975
BP	GO:2000816	negative regulation of mitotic sister chromatid separation	19_GO:0048519 negative regulation of biological process	-4.766735701	5.706936694	11	Birc5|Bub1|Bub1b|Plk1|Aurkb|Ttk|Mad2l1|Ndc80|Cdt1|Spdl1|Ccnb1	-2.80002975
BP	GO:0010948	negative regulation of cell cycle process	19_GO:0048519 negative regulation of biological process	-4.742472646	4.85997508	30	Birc5|Bub1|Bub1b|Ccnf|Cdk1|Cdkn1a|Cdkn2d|Klf4|Mif|Nek2|Orc1|Osm|Plk1|Slfn1|Sox4|Aurkb|Ttk|Nubp1|Ppp1r10|Mad2l1|Gpr132|Rpl23|Rgcc|Ndc80|Cdt1|Spdl1|Gpnmb|Zc3h12d|Ccnb1|Brsk1	-2.784125293
BP	GO:1905819	negative regulation of chromosome separation	19_GO:0048519 negative regulation of biological process	-4.658410863	5.600115724	11	Birc5|Bub1|Bub1b|Plk1|Aurkb|Ttk|Mad2l1|Ndc80|Cdt1|Spdl1|Ccnb1	-2.716109797
BP	GO:0000075	cell cycle checkpoint	19_GO:0048519 negative regulation of biological process	-4.656038665	4.872745591	26	Birc5|Bub1|Bub1b|Cdk1|Cdkn1a|E2f1|Orc1|Plk1|Prox1|Sox4|Aurkb|Aurka|Timeless|Ttk|Trp53bp1|Ppp1r10|Mad2l1|Ndc80|Cdt1|Etaa1|Spdl1|Prcc|Eme1|Ccnb1|Dna2|Brsk1	-2.715444063
BP	GO:0007091	metaphase/anaphase transition of mitotic cell cycle	19_GO:0071840 cellular component organization or biogenesis	-4.519495017	5.281174697	13	Birc5|Bub1|Bub1b|Plk1|Aurkb|Tacc3|Ttk|Mad2l1|Ndc80|Cdt1|Ube2c|Spdl1|Ccnb1	-2.602112514
BP	GO:0033048	negative regulation of mitotic sister chromatid segregation	19_GO:0048519 negative regulation of biological process	-4.452245826	5.396179882	11	Birc5|Bub1|Bub1b|Plk1|Aurkb|Ttk|Mad2l1|Ndc80|Cdt1|Spdl1|Ccnb1	-2.553817363
BP	GO:1901991	negative regulation of mitotic cell cycle phase transition	19_GO:0048519 negative regulation of biological process	-4.4483992	4.809700755	22	Birc5|Bub1|Bub1b|Cdk1|Cdkn1a|Klf4|Orc1|Plk1|Slfn1|Sox4|Aurkb|Ttk|Mad2l1|Gpr132|Rgcc|Ndc80|Cdt1|Spdl1|Gpnmb|Zc3h12d|Ccnb1|Brsk1	-2.551513525
BP	GO:0010965	regulation of mitotic sister chromatid separation	19_GO:0071840 cellular component organization or biogenesis	-4.437234913	5.204790631	13	Birc5|Bub1|Bub1b|Plk1|Aurkb|Tacc3|Ttk|Mad2l1|Ndc80|Cdt1|Ube2c|Spdl1|Ccnb1	-2.54341847
BP	GO:0044784	metaphase/anaphase transition of cell cycle	19_GO:0071840 cellular component organization or biogenesis	-4.356930685	5.130026144	13	Birc5|Bub1|Bub1b|Plk1|Aurkb|Tacc3|Ttk|Mad2l1|Ndc80|Cdt1|Ube2c|Spdl1|Ccnb1	-2.481758938
BP	GO:0071459	protein localization to chromosome, centromeric region	19_GO:0051179 localization	-4.356137271	5.71962627	8	Bub1b|Cdk1|Cenpa|Aurkb|Ttk|Ndc80|Cdt1|Spdl1	-2.481758938
BP	GO:0033046	negative regulation of sister chromatid segregation	19_GO:0048519 negative regulation of biological process	-4.258869526	5.20403306	11	Birc5|Bub1|Bub1b|Plk1|Aurkb|Ttk|Mad2l1|Ndc80|Cdt1|Spdl1|Ccnb1	-2.404847799
BP	GO:0045839	negative regulation of mitotic nuclear division	19_GO:0048519 negative regulation of biological process	-4.255052934	5.110724872	12	Birc5|Bub1|Bub1b|Plk1|Aurkb|Ttk|Mad2l1|Rgcc|Ndc80|Cdt1|Spdl1|Ccnb1	-2.404847799
BP	GO:0051783	regulation of nuclear division	19_GO:0071840 cellular component organization or biogenesis	-4.210147126	4.533013723	26	Birc5|Bub1|Bub1b|Cdkn1c|Igf2|Il1b|Nek2|Osm|Pdgfb|Plk1|Sphk1|Aurkb|Tacc3|Ttk|Mad2l1|Piwil2|Rgcc|Ndc80|Cdt1|Cdca5|Ube2c|Spdl1|Cul9|Cdc20|Nusap1|Ccnb1	-2.369135007
BP	GO:0051306	mitotic sister chromatid separation	19_GO:0071840 cellular component organization or biogenesis	-4.201906221	4.985105587	13	Birc5|Bub1|Bub1b|Plk1|Aurkb|Tacc3|Ttk|Mad2l1|Ndc80|Cdt1|Ube2c|Spdl1|Ccnb1	-2.363973961
BP	GO:1901988	negative regulation of cell cycle phase transition	19_GO:0048519 negative regulation of biological process	-4.196509455	4.584592563	23	Birc5|Bub1|Bub1b|Cdk1|Cdkn1a|Cdkn2d|Klf4|Orc1|Plk1|Slfn1|Sox4|Aurkb|Ttk|Mad2l1|Gpr132|Rgcc|Ndc80|Cdt1|Spdl1|Gpnmb|Zc3h12d|Ccnb1|Brsk1	-2.362592272
BP	GO:0007088	regulation of mitotic nuclear division	19_GO:0071840 cellular component organization or biogenesis	-4.153949704	4.550667223	23	Birc5|Bub1|Bub1b|Cdkn1c|Igf2|Il1b|Nek2|Pdgfb|Plk1|Sphk1|Aurkb|Tacc3|Ttk|Mad2l1|Rgcc|Ndc80|Cdt1|Cdca5|Ube2c|Spdl1|Cul9|Nusap1|Ccnb1	-2.326642915
BP	GO:0030071	regulation of mitotic metaphase/anaphase transition	19_GO:0071840 cellular component organization or biogenesis	-4.090703078	4.951980751	12	Birc5|Bub1|Bub1b|Plk1|Aurkb|Ttk|Mad2l1|Ndc80|Cdt1|Ube2c|Spdl1|Ccnb1	-2.273767994
BP	GO:0051784	negative regulation of nuclear division	19_GO:0048519 negative regulation of biological process	-4.053891543	4.845945822	13	Birc5|Bub1|Bub1b|Osm|Plk1|Aurkb|Ttk|Mad2l1|Rgcc|Ndc80|Cdt1|Spdl1|Ccnb1	-2.253299424
BP	GO:1905818	regulation of chromosome separation	19_GO:0050789 regulation of biological process	-4.053891543	4.845945822	13	Birc5|Bub1|Bub1b|Plk1|Aurkb|Tacc3|Ttk|Mad2l1|Ndc80|Cdt1|Ube2c|Spdl1|Ccnb1	-2.253299424
BP	GO:0033045	regulation of sister chromatid segregation	19_GO:0071840 cellular component organization or biogenesis	-3.989715624	4.67494383	15	Birc5|Bub1|Bub1b|Plk1|Aurkb|Tacc3|Ttk|Mad2l1|Ndc80|Cdt1|Cdca5|Ube2c|Spdl1|Sfpq|Ccnb1	-2.206061927
BP	GO:1902099	regulation of metaphase/anaphase transition of cell cycle	19_GO:0071840 cellular component organization or biogenesis	-3.934608952	4.800354197	12	Birc5|Bub1|Bub1b|Plk1|Aurkb|Ttk|Mad2l1|Ndc80|Cdt1|Ube2c|Spdl1|Ccnb1	-2.168399145
BP	GO:0045930	negative regulation of mitotic cell cycle	19_GO:0048519 negative regulation of biological process	-3.852602616	4.20785028	29	Abl1|Birc5|Bub1|Bub1b|Cdk1|Cdkn1a|Cdkn1c|Klf4|Smad3|Orc1|Plk1|Slfn1|Sox4|Aurkb|Ttk|Ppp1r10|Mad2l1|Gpr132|Rgcc|Ndc80|Cdt1|Spdl1|Gpnmb|Prcc|Zc3h12d|Eme1|Ccnb1|Heca|Brsk1	-2.112922857
BP	GO:0007080	mitotic metaphase plate congression	19_GO:0051179 localization	-3.724611105	4.754723983	10	Aurkb|Cdca8|Nuf2|Ndc80|Cdt1|Cdca5|Spdl1|Kif2c|Kif22|Ccnb1	-2.013964219
BP	GO:0033047	regulation of mitotic sister chromatid segregation	19_GO:0071840 cellular component organization or biogenesis	-3.647371592	4.459049467	13	Birc5|Bub1|Bub1b|Plk1|Aurkb|Tacc3|Ttk|Mad2l1|Ndc80|Cdt1|Ube2c|Spdl1|Ccnb1	-1.961102287
BP	GO:0007093	mitotic cell cycle checkpoint	19_GO:0048519 negative regulation of biological process	-3.623941	4.208281125	19	Birc5|Bub1|Bub1b|Cdk1|Cdkn1a|Orc1|Plk1|Sox4|Aurkb|Ttk|Ppp1r10|Mad2l1|Ndc80|Cdt1|Spdl1|Prcc|Eme1|Ccnb1|Brsk1	-1.942699346
BP	GO:0034501	protein localization to kinetochore	19_GO:0051179 localization	-3.386339793	4.95261813	6	Cdk1|Aurkb|Ttk|Ndc80|Cdt1|Spdl1	-1.751854711
BP	GO:0051310	metaphase plate congression	19_GO:0051179 localization	-3.177136391	4.105741915	11	Aurkb|Cdca8|Spag5|Nuf2|Ndc80|Cdt1|Cdca5|Spdl1|Kif2c|Kif22|Ccnb1	-1.585876464
BP	GO:0051315	attachment of mitotic spindle microtubules to kinetochore	19_GO:0051179 localization	-3.04914493	4.746156456	5	Aurkb|Nuf2|Ndc80|Cdt1|Kif2c	-1.488051357
BP	GO:0051304	chromosome separation	19_GO:0009987 cellular process	-2.93614605	3.722559452	14	Birc5|Bub1|Bub1b|Plk1|Aurkb|Tacc3|Ttk|Mad2l1|Ndc80|Cdt1|Ube2c|Spdl1|Eme1|Ccnb1	-1.394512125
BP	GO:0034502	protein localization to chromosome	19_GO:0051179 localization	-2.73335995	3.552962811	13	Bub1b|Cdk1|Cenpa|Plk1|Aurkb|Ttk|Ndc80|Cdt1|Cdca5|Spdl1|Tex15|Tasor|Setd2	-1.256207659
BP	GO:0050000	chromosome localization	19_GO:0051179 localization	-2.717024606	3.574316831	12	Birc5|Aurkb|Cdca8|Spag5|Nuf2|Ndc80|Cdt1|Cdca5|Spdl1|Kif2c|Kif22|Ccnb1	-1.248411619
BP	GO:0051303	establishment of chromosome localization	19_GO:0051179 localization	-2.717024606	3.574316831	12	Birc5|Aurkb|Cdca8|Spag5|Nuf2|Ndc80|Cdt1|Cdca5|Spdl1|Kif2c|Kif22|Ccnb1	-1.248411619
CC	GO:0000793	condensed chromosome		-2.463978447	3.090580483	23	Birc5|Bub1|Bub1b|Cenpa|Hspa2|Nek2|Plk1|Rad51|Aurkb|Aurka|Cenpk|Spc25|Ska1|Nuf2|Pmf1|Ndc80|Spdl1|Syce2|Sgo1|Ncapg2|Mis18bp1|Kmt5c|Ccnb1	-1.064277386
CC	GO:0000794	condensed nuclear chromosome		-2.206955543	2.897905413	18	Bub1|Bub1b|Cenpa|Hspa2|Nek2|Plk1|Rad51|Aurkb|Aurka|Cenpk|Nuf2|Pmf1|Ndc80|Syce2|Sgo1|Mis18bp1|Kmt5c|Ccnb1	-0.897247258
BP	GO:0048514	blood vessel morphogenesis	19_GO:0032502 developmental process	-12.847545	8.464919298	88	Abl1|Adam8|Adra2b|Angpt2|Ang|Rhob|Bax|Anxa2|Cfh|Cxcr4|Ccr2|Ecm1|Efna1|Eng|Epha2|Eya1|Fn1|Fzd4|Gja1|Glul|Gpld1|Adgrg1|Gtf2i|Hbegf|Hes1|Hmga2|Hpse|Hpgd|Cxcl10|Igf2|Il1b|Itga5|Itgax|Itgb1bp1|Jup|Klf4|Anpep|Lgals3|Smad7|Cited2|Ngp|Pde3b|Pdgfb|Pgf|Pgk1|Pkm|Prkca|Plcg1|Prox1|Ptprm|Qk|Rock2|S100a1|Sos1|Sox4|Sparc|Sphk1|Tgfbr1|Tgfbr2|Thbs1|Tjp1|Cd40|Vav2|Fmnl3|Aplnr|Ets1|Clic4|Htatip2|Ramp2|Calcrl|Ramp3|…	-9.34550826
BP	GO:0001944	vasculature development	19_GO:0032502 developmental process	-12.51838477	8.229276543	99	Abl1|Acvr2b|Adam8|Adra2b|Angpt2|Ang|Rhob|Bax|Anxa2|Cfh|Cxcr4|Ccr2|Col1a2|Ddit3|Ecm1|Efna1|Egr1|Eng|Epha2|Eya1|Fn1|Fzd4|Gja1|Glul|Pdpn|Gpld1|Adgrg1|Gtf2i|Hbegf|Hes1|Hmga2|Hpse|Hpgd|Cxcl10|Ifng|Igf2|Il1b|Itga5|Itgax|Itgb1bp1|Jup|Kit|Klf4|Anpep|Lgals3|Smad7|Mef2c|Cited2|Ngp|Pde3b|Pdgfb|Pgf|Pgk1|Pkm|Prkca|Plcg1|Prox1|Ptprm|Qk|Rock2|S100a1|Sod2|Sos1|Sox4|Sparc|Sphk1|Tgfbr1|Tgfbr2|Thbs1|Tjp1|Cd40|Vav2|…	-9.200929043
BP	GO:0072358	cardiovascular system development	19_GO:0032502 developmental process	-12.51838477	8.229276543	99	Abl1|Acvr2b|Adam8|Adra2b|Angpt2|Ang|Rhob|Bax|Anxa2|Cfh|Cxcr4|Ccr2|Col1a2|Ddit3|Ecm1|Efna1|Egr1|Eng|Epha2|Eya1|Fn1|Fzd4|Gja1|Glul|Pdpn|Gpld1|Adgrg1|Gtf2i|Hbegf|Hes1|Hmga2|Hpse|Hpgd|Cxcl10|Ifng|Igf2|Il1b|Itga5|Itgax|Itgb1bp1|Jup|Kit|Klf4|Anpep|Lgals3|Smad7|Mef2c|Cited2|Ngp|Pde3b|Pdgfb|Pgf|Pgk1|Pkm|Prkca|Plcg1|Prox1|Ptprm|Qk|Rock2|S100a1|Sod2|Sos1|Sox4|Sparc|Sphk1|Tgfbr1|Tgfbr2|Thbs1|Tjp1|Cd40|Vav2|…	-9.200929043
BP	GO:0001568	blood vessel development	19_GO:0032502 developmental process	-12.50667114	8.248753264	96	Abl1|Acvr2b|Adam8|Adra2b|Angpt2|Ang|Rhob|Bax|Anxa2|Cfh|Cxcr4|Ccr2|Col1a2|Ddit3|Ecm1|Efna1|Egr1|Eng|Epha2|Eya1|Fn1|Fzd4|Gja1|Glul|Gpld1|Adgrg1|Gtf2i|Hbegf|Hes1|Hmga2|Hpse|Hpgd|Cxcl10|Ifng|Igf2|Il1b|Itga5|Itgax|Itgb1bp1|Jup|Klf4|Anpep|Lgals3|Smad7|Mef2c|Cited2|Ngp|Pde3b|Pdgfb|Pgf|Pgk1|Pkm|Prkca|Plcg1|Prox1|Ptprm|Qk|Rock2|S100a1|Sos1|Sox4|Sparc|Sphk1|Tgfbr1|Tgfbr2|Thbs1|Tjp1|Cd40|Vav2|Fmnl3|Aplnr|Et…	-9.200929043
BP	GO:1901342	regulation of vasculature development	19_GO:0032502 developmental process	-10.8296206	7.968132748	56	Abl1|Angpt2|Rhob|Cxcr4|Ccr2|Ecm1|Efna1|Egr1|Eng|Epha2|Glul|Gtf2i|Hmga2|Cxcl10|Ifng|Igf2|Il1b|Itga5|Itgax|Itgb1bp1|Jup|Kit|Klf4|Lgals3|Ngp|Pde3b|Pdgfb|Pgf|Pgk1|Pkm|Prkca|Plcg1|Ptprm|Rock2|S100a1|Sod2|Sparc|Sphk1|Tgfbr2|Thbs1|Tjp1|Cd40|Aplnr|Ets1|Htatip2|Ramp2|Smoc2|Rgcc|Mtdh|Ecscr|Ddah1|Hdac9|Rnh1|Cela1|Tlr3|Atp2b4	-7.76123942
BP	GO:0001525	angiogenesis	19_GO:0032502 developmental process	-10.75804462	7.698260302	73	Abl1|Adam8|Adra2b|Angpt2|Ang|Rhob|Anxa2|Cfh|Cxcr4|Ccr2|Ecm1|Efna1|Eng|Epha2|Fn1|Glul|Gpld1|Adgrg1|Gtf2i|Hbegf|Hmga2|Hpse|Cxcl10|Igf2|Il1b|Itga5|Itgax|Itgb1bp1|Jup|Klf4|Anpep|Lgals3|Ngp|Pde3b|Pgf|Pgk1|Pkm|Prkca|Plcg1|Ptprm|Rock2|S100a1|Sparc|Sphk1|Tgfbr1|Tgfbr2|Thbs1|Tjp1|Cd40|Vav2|Fmnl3|Aplnr|Ets1|Clic4|Htatip2|Ramp2|Calcrl|Ramp3|Angptl4|Mmp19|Smoc2|Rgcc|Mtdh|Ecscr|Ddah1|Plxdc1|Hdac9|Rnh1|Cela1|T…	-7.71193983
BP	GO:0030335	positive regulation of cell migration	19_GO:0040011 locomotion	-10.16381077	7.410121046	74	Abl1|Adam8|Adora2b|Adra2a|Rhob|Arhgap5|Cxcr4|Ccr1|Ccr2|Ccr7|Csf1r|Egr1|Dmtn|F7|Fgr|Fn1|Gcnt2|Rack1|Pdpn|Gpld1|Hbegf|Cxcl10|Ifng|Igf2|Igfbp5|Il1b|Itga5|Itgax|Itgb1bp1|Kit|Lgals3|Smad3|Mif|Fam89b|Numb|P2ry2|Pdgfb|Pgf|Pik3r1|Prkca|Plcg1|Pld1|Prox1|Rock2|Sell|Sod2|Sparc|Sphk1|Tgfbr1|Tgfbr2|Thbs1|Tjp1|Tnfrsf18|Cd40|Ets1|Tlr2|Pla2g7|Tnfsf14|Cxcl14|Cd274|Smoc2|Cxcl16|Smurf2|P2ry12|Vsir|Clasp2|Hdac9|Il23…	-7.214615995
BP	GO:0045765	regulation of angiogenesis	19_GO:0032502 developmental process	-10.1282187	7.706545114	51	Abl1|Angpt2|Rhob|Cxcr4|Ccr2|Ecm1|Efna1|Eng|Epha2|Glul|Gtf2i|Hmga2|Cxcl10|Igf2|Il1b|Itga5|Itgax|Itgb1bp1|Jup|Klf4|Lgals3|Ngp|Pde3b|Pgf|Pgk1|Pkm|Prkca|Plcg1|Ptprm|Rock2|S100a1|Sparc|Sphk1|Tgfbr2|Thbs1|Tjp1|Cd40|Aplnr|Ets1|Htatip2|Ramp2|Smoc2|Rgcc|Mtdh|Ecscr|Ddah1|Hdac9|Rnh1|Cela1|Tlr3|Atp2b4	-7.196057261
BP	GO:2000147	positive regulation of cell motility	19_GO:0040011 locomotion	-9.360821351	7.026925563	74	Abl1|Adam8|Adora2b|Adra2a|Rhob|Arhgap5|Cxcr4|Ccr1|Ccr2|Ccr7|Csf1r|Egr1|Dmtn|F7|Fgr|Fn1|Gcnt2|Rack1|Pdpn|Gpld1|Hbegf|Cxcl10|Ifng|Igf2|Igfbp5|Il1b|Itga5|Itgax|Itgb1bp1|Kit|Lgals3|Smad3|Mif|Fam89b|Numb|P2ry2|Pdgfb|Pgf|Pik3r1|Prkca|Plcg1|Pld1|Prox1|Rock2|Sell|Sod2|Sparc|Sphk1|Tgfbr1|Tgfbr2|Thbs1|Tjp1|Tnfrsf18|Cd40|Ets1|Tlr2|Pla2g7|Tnfsf14|Cxcl14|Cd274|Smoc2|Cxcl16|Smurf2|P2ry12|Vsir|Clasp2|Hdac9|Il23…	-6.545165485
BP	GO:1904018	positive regulation of vasculature development	19_GO:0048518 positive regulation of biological process	-8.85675906	7.336514835	37	Abl1|Angpt2|Rhob|Cxcr4|Ecm1|Egr1|Eng|Hmga2|Igf2|Il1b|Itga5|Itgax|Jup|Kit|Klf4|Lgals3|Pdgfb|Pgf|Pkm|Prkca|Plcg1|S100a1|Sod2|Sphk1|Tgfbr2|Thbs1|Tjp1|Cd40|Aplnr|Ets1|Ramp2|Smoc2|Mtdh|Ddah1|Hdac9|Cela1|Tlr3	-6.100688884
BP	GO:0040017	positive regulation of locomotion	19_GO:0040011 locomotion	-8.731222013	6.710846355	75	Abl1|Adam8|Adora2b|Adra2a|Rhob|Arhgap5|Cxcr4|Ccr1|Ccr2|Ccr7|Csf1r|Egr1|Dmtn|F7|Fgr|Fn1|Gcnt2|Rack1|Pdpn|Gpld1|Hbegf|Cxcl10|Ifng|Igf2|Igfbp5|Il1b|Itga5|Itgax|Itgb1bp1|Kit|Lgals3|Smad3|Mif|Fam89b|Numb|P2ry2|Pdgfb|Pgf|Pik3r1|Prkca|Plcg1|Pld1|Prox1|Rock2|Sell|Sod2|Sparc|Sphk1|Stx3|Tgfbr1|Tgfbr2|Thbs1|Tjp1|Tnfrsf18|Cd40|Ets1|Tlr2|Pla2g7|Tnfsf14|Cxcl14|Cd274|Smoc2|Cxcl16|Smurf2|P2ry12|Vsir|Clasp2|Hdac9…	-5.996871087
BP	GO:0051272	positive regulation of cellular component movement	19_GO:0051179 localization	-8.67726902	6.692036528	74	Abl1|Adam8|Adora2b|Adra2a|Rhob|Arhgap5|Cxcr4|Ccr1|Ccr2|Ccr7|Csf1r|Egr1|Dmtn|F7|Fgr|Fn1|Gcnt2|Rack1|Pdpn|Gpld1|Hbegf|Cxcl10|Ifng|Igf2|Igfbp5|Il1b|Itga5|Itgax|Itgb1bp1|Kit|Lgals3|Smad3|Mif|Fam89b|Numb|P2ry2|Pdgfb|Pgf|Pik3r1|Prkca|Plcg1|Pld1|Prox1|Rock2|Sell|Sod2|Sparc|Sphk1|Tgfbr1|Tgfbr2|Thbs1|Tjp1|Tnfrsf18|Cd40|Ets1|Tlr2|Pla2g7|Tnfsf14|Cxcl14|Cd274|Smoc2|Cxcl16|Smurf2|P2ry12|Vsir|Clasp2|Hdac9|Il23…	-5.953383528
BP	GO:0045766	positive regulation of angiogenesis	19_GO:0048518 positive regulation of biological process	-7.824000347	6.833717525	33	Abl1|Angpt2|Rhob|Cxcr4|Ecm1|Eng|Hmga2|Igf2|Il1b|Itga5|Itgax|Jup|Klf4|Lgals3|Pgf|Pkm|Prkca|Plcg1|S100a1|Sphk1|Tgfbr2|Thbs1|Tjp1|Cd40|Aplnr|Ets1|Ramp2|Smoc2|Mtdh|Ddah1|Hdac9|Cela1|Tlr3	-5.255016815
BP	GO:0001667	ameboidal-type cell migration	19_GO:0040011 locomotion	-6.654906604	5.796906132	53	Abl1|Macf1|Adam8|Adora2b|Angpt2|Rhob|Cd63|Cxcr4|Efna1|Efnb1|Eng|Dmtn|Epha2|Srgap2|Gja1|Glul|Gpld1|Hbegf|Ifng|Igf2|Itgb1bp1|Itgb7|Jup|Kit|Klf4|Lrp6|Mef2c|Pdgfb|Prkca|Plcg1|Prox1|Ptprm|Rock2|Sparc|Scarb1|Tgfbr1|Tgfbr2|Thbs1|Timp1|Cd40|Coro1c|Ets1|Smoc2|Rgcc|Smurf2|Anln|P2ry12|Clasp2|Hdac9|Sema6d|Smo|Atp2b4|Glipr2	-4.298997897
BP	GO:0010632	regulation of epithelial cell migration	19_GO:0040011 locomotion	-6.422097661	5.906265993	35	Abl1|Macf1|Adora2b|Angpt2|Rhob|Cd63|Efna1|Epha2|Glul|Gpld1|Hbegf|Ifng|Igf2|Itgb1bp1|Jup|Klf4|Mef2c|Pdgfb|Prkca|Plcg1|Prox1|Ptprm|Rock2|Sparc|Tgfbr2|Thbs1|Cd40|Coro1c|Ets1|Smoc2|Rgcc|Clasp2|Hdac9|Atp2b4|Glipr2	-4.096152177
BP	GO:0010631	epithelial cell migration	19_GO:0040011 locomotion	-6.183981772	5.670232809	40	Abl1|Macf1|Adam8|Adora2b|Angpt2|Rhob|Cd63|Efna1|Epha2|Glul|Gpld1|Hbegf|Ifng|Igf2|Itgb1bp1|Jup|Kit|Klf4|Mef2c|Pdgfb|Prkca|Plcg1|Prox1|Ptprm|Rock2|Sparc|Scarb1|Tgfbr1|Tgfbr2|Thbs1|Cd40|Coro1c|Ets1|Smoc2|Rgcc|Anln|Clasp2|Hdac9|Atp2b4|Glipr2	-3.876802004
BP	GO:0090132	epithelium migration	19_GO:0032501 multicellular organismal process	-6.10723937	5.622054117	40	Abl1|Macf1|Adam8|Adora2b|Angpt2|Rhob|Cd63|Efna1|Epha2|Glul|Gpld1|Hbegf|Ifng|Igf2|Itgb1bp1|Jup|Kit|Klf4|Mef2c|Pdgfb|Prkca|Plcg1|Prox1|Ptprm|Rock2|Sparc|Scarb1|Tgfbr1|Tgfbr2|Thbs1|Cd40|Coro1c|Ets1|Smoc2|Rgcc|Anln|Clasp2|Hdac9|Atp2b4|Glipr2	-3.817009439
BP	GO:0090130	tissue migration	19_GO:0032501 multicellular organismal process	-6.031407124	5.574260979	40	Abl1|Macf1|Adam8|Adora2b|Angpt2|Rhob|Cd63|Efna1|Epha2|Glul|Gpld1|Hbegf|Ifng|Igf2|Itgb1bp1|Jup|Kit|Klf4|Mef2c|Pdgfb|Prkca|Plcg1|Prox1|Ptprm|Rock2|Sparc|Scarb1|Tgfbr1|Tgfbr2|Thbs1|Cd40|Coro1c|Ets1|Smoc2|Rgcc|Anln|Clasp2|Hdac9|Atp2b4|Glipr2	-3.770632171
BP	GO:0010594	regulation of endothelial cell migration	19_GO:0040011 locomotion	-5.84703343	5.709694867	27	Abl1|Adora2b|Angpt2|Rhob|Efna1|Epha2|Glul|Gpld1|Igf2|Itgb1bp1|Jup|Klf4|Mef2c|Pdgfb|Prkca|Plcg1|Prox1|Ptprm|Rock2|Sparc|Thbs1|Cd40|Ets1|Smoc2|Rgcc|Hdac9|Atp2b4	-3.625877048
BP	GO:0043534	blood vessel endothelial cell migration	19_GO:0040011 locomotion	-5.255376546	5.47136717	21	Abl1|Adam8|Angpt2|Efna1|Epha2|Gpld1|Igf2|Itgb1bp1|Jup|Klf4|Mef2c|Pdgfb|Prkca|Plcg1|Scarb1|Thbs1|Cd40|Ets1|Rgcc|Hdac9|Atp2b4	-3.165920338
BP	GO:0043542	endothelial cell migration	19_GO:0040011 locomotion	-5.182549329	5.173967501	30	Abl1|Adam8|Adora2b|Angpt2|Rhob|Efna1|Epha2|Glul|Gpld1|Igf2|Itgb1bp1|Jup|Klf4|Mef2c|Pdgfb|Prkca|Plcg1|Prox1|Ptprm|Rock2|Sparc|Scarb1|Tgfbr1|Thbs1|Cd40|Ets1|Smoc2|Rgcc|Hdac9|Atp2b4	-3.120971855
BP	GO:0043535	regulation of blood vessel endothelial cell migration	19_GO:0040011 locomotion	-5.102104836	5.480155705	18	Abl1|Angpt2|Efna1|Epha2|Igf2|Itgb1bp1|Jup|Klf4|Mef2c|Pdgfb|Prkca|Plcg1|Thbs1|Cd40|Ets1|Rgcc|Hdac9|Atp2b4	-3.062466091
BP	GO:0010634	positive regulation of epithelial cell migration	19_GO:0040011 locomotion	-4.173615191	4.590312874	22	Abl1|Adora2b|Rhob|Gpld1|Hbegf|Ifng|Igf2|Itgb1bp1|Pdgfb|Prkca|Plcg1|Prox1|Rock2|Sparc|Tgfbr2|Thbs1|Cd40|Ets1|Smoc2|Clasp2|Hdac9|Glipr2	-2.342354252
BP	GO:0010595	positive regulation of endothelial cell migration	19_GO:0040011 locomotion	-3.995067889	4.59433304	17	Abl1|Adora2b|Rhob|Gpld1|Igf2|Itgb1bp1|Pdgfb|Prkca|Plcg1|Prox1|Rock2|Sparc|Thbs1|Cd40|Ets1|Smoc2|Hdac9	-2.20903449
BP	GO:0043536	positive regulation of blood vessel endothelial cell migration	19_GO:0040011 locomotion	-2.242367513	3.184039078	9	Abl1|Igf2|Pdgfb|Prkca|Plcg1|Thbs1|Cd40|Ets1|Hdac9	-0.914764415
BP	GO:0030595	leukocyte chemotaxis	19_GO:0040011 locomotion	-10.98464115	8.372938865	42	Adam8|Bst1|Ch25h|Ccr1|Ccr2|Ccr7|Csf1r|Cyp7b1|F7|Cxcl1|Cxcl10|Ifng|Il1b|Kit|Lgals3|Mif|Pdgfb|Padi2|Pgf|Prkca|S100a8|S100a9|Ccl6|Ccl7|Ccl9|Cxcl2|Sell|Spp1|Thbs1|Pla2g7|Tnfsf14|Cxcl11|Cxcl14|Trem1|Gpr35|Cxcl16|Il23a|Mtus1|Itga9|Gpr18|Prex1|Cxcl3	-7.841626346
BP	GO:0060326	cell chemotaxis	19_GO:0040011 locomotion	-9.93146354	7.643522865	49	Adam8|Bst1|Ch25h|Cxcr4|Ccr1|Ccr2|Ccr7|Csf1r|Cyp7b1|Eng|Epha2|F7|Cxcl1|Hbegf|Cxcl10|Ifng|Il1b|Kit|Lgals3|Mif|Pdgfb|Padi2|Pgf|Prkca|S100a8|S100a9|Saa3|Ccl6|Ccl7|Ccl9|Cxcl2|Sell|Spp1|Thbs1|Pla2g7|Tnfsf14|Cxcl11|Cxcl14|Trem1|Smoc2|Gpr35|Cxcl16|Il23a|Mtus1|Itga9|Gpr18|Dock4|Prex1|Cxcl3	-7.046726755
BP	GO:0050900	leukocyte migration	19_GO:0040011 locomotion	-9.204678566	7.19335524	53	Adam8|Apod|Bst1|Cd24a|Ch25h|Ccr1|Ccr2|Ccr7|Csf1r|Cyp7b1|Ecm1|F7|Gcsam|Cxcl1|Cxcl10|Ifng|Il1b|Itgb7|Kit|Lgals3|Mif|Cd200|Pdgfb|Padi2|Pgf|Prkca|S100a8|S100a9|Ccl6|Ccl7|Ccl9|Cxcl2|Sell|Selplg|Spp1|Thbs1|Tnfrsf18|Tlr2|Pla2g7|Tnfsf14|Cxcl11|Cxcl14|Trem1|Gpr35|Cxcl16|P2ry12|Il33|Il23a|Mtus1|Itga9|Gpr18|Prex1|Cxcl3	-6.401611827
BP	GO:0097529	myeloid leukocyte migration	19_GO:0040011 locomotion	-7.69778467	6.676270846	36	Adam8|Bst1|Ccr1|Ccr2|Ccr7|Csf1r|Cxcl1|Cxcl10|Ifng|Il1b|Kit|Lgals3|Mif|Cd200|Pdgfb|Pgf|Prkca|S100a8|S100a9|Ccl6|Ccl7|Ccl9|Cxcl2|Sell|Spp1|Thbs1|Pla2g7|Cxcl11|Trem1|Gpr35|P2ry12|Il23a|Mtus1|Itga9|Prex1|Cxcl3	-5.156829861
BP	GO:0030593	neutrophil chemotaxis	19_GO:0040011 locomotion	-7.289537126	6.927560302	22	Bst1|Ccr7|Cxcl1|Cxcl10|Ifng|Il1b|Lgals3|Prkca|S100a8|S100a9|Ccl6|Ccl7|Ccl9|Cxcl2|Sell|Spp1|Cxcl11|Trem1|Il23a|Itga9|Prex1|Cxcl3	-4.828893068
BP	GO:0071621	granulocyte chemotaxis	19_GO:0040011 locomotion	-6.544189844	6.301224946	24	Bst1|Ccr7|Csf1r|Cxcl1|Cxcl10|Ifng|Il1b|Lgals3|Prkca|S100a8|S100a9|Ccl6|Ccl7|Ccl9|Cxcl2|Sell|Spp1|Thbs1|Cxcl11|Trem1|Il23a|Itga9|Prex1|Cxcl3	-4.209892286
BP	GO:0006935	chemotaxis	19_GO:0040011 locomotion	-6.166759959	5.408776527	67	Adam8|Angpt2|Bst1|Cdk5r1|Ch25h|Cxcr4|Ccr1|Ccr2|Ccr7|Csf1r|Cyp7b1|Efna1|Efnb1|Emb|Eng|Epha2|F7|Fn1|Cxcl1|Hbegf|Cxcl10|Ifng|Il1b|Kit|Lgals3|Smad3|Mif|Pdgfb|Padi2|Pgf|Prkca|Ptprm|S100a8|S100a9|Saa3|Ccl6|Ccl7|Ccl9|Cxcl2|Sell|Spp1|Stx3|Thbs1|Pla2g7|Tnfsf14|Cxcl11|Cxcl14|Trem1|Smoc2|Gpr35|Cxcl16|Ecscr|P2ry12|Flrt3|Il23a|Mtus1|Itga9|Mycbp2|Gpr18|Sema6d|Rtn4rl1|Dock4|Plxna4|Prex1|Nrcam|Smo|Cxcl3	-3.872615738
BP	GO:1990266	neutrophil migration	19_GO:0040011 locomotion	-6.085983027	6.01370572	23	Adam8|Bst1|Ccr7|Cxcl1|Cxcl10|Ifng|Il1b|Lgals3|Prkca|S100a8|S100a9|Ccl6|Ccl7|Ccl9|Cxcl2|Sell|Spp1|Cxcl11|Trem1|Il23a|Itga9|Prex1|Cxcl3	-3.803306233
BP	GO:0042330	taxis	19_GO:0040011 locomotion	-6.040632507	5.336403763	67	Adam8|Angpt2|Bst1|Cdk5r1|Ch25h|Cxcr4|Ccr1|Ccr2|Ccr7|Csf1r|Cyp7b1|Efna1|Efnb1|Emb|Eng|Epha2|F7|Fn1|Cxcl1|Hbegf|Cxcl10|Ifng|Il1b|Kit|Lgals3|Smad3|Mif|Pdgfb|Padi2|Pgf|Prkca|Ptprm|S100a8|S100a9|Saa3|Ccl6|Ccl7|Ccl9|Cxcl2|Sell|Spp1|Stx3|Thbs1|Pla2g7|Tnfsf14|Cxcl11|Cxcl14|Trem1|Smoc2|Gpr35|Cxcl16|Ecscr|P2ry12|Flrt3|Il23a|Mtus1|Itga9|Mycbp2|Gpr18|Sema6d|Rtn4rl1|Dock4|Plxna4|Prex1|Nrcam|Smo|Cxcl3	-3.77267897
MF	GO:0005126	cytokine receptor binding		-5.815803439	5.424093107	41	Angpt2|Cd44|Csf3|Ecm1|Eng|Cxcl1|Cxcl10|Ifng|Il1b|Il1rn|Ltb|Smad3|Smad7|Mif|Osm|Pgf|Pik3r1|Plcg1|Ccl6|Ccl7|Ccl9|Cxcl2|Tgfbr1|Tgfbr2|Tnfsf9|Traf1|Traf5|Siva1|Tnfsf14|Tslp|Cxcl11|Cxcl14|Cxcl16|Smurf2|Tnfsf13|Il33|Il23a|Zfp369|Cd300lf|Cxcl3|Gm13283	-3.604811922
BP	GO:0097530	granulocyte migration	19_GO:0040011 locomotion	-5.394893011	5.443533866	25	Adam8|Bst1|Ccr7|Csf1r|Cxcl1|Cxcl10|Ifng|Il1b|Lgals3|Prkca|S100a8|S100a9|Ccl6|Ccl7|Ccl9|Cxcl2|Sell|Spp1|Thbs1|Cxcl11|Trem1|Il23a|Itga9|Prex1|Cxcl3	-3.2704747
BP	GO:0050920	regulation of chemotaxis	19_GO:0040011 locomotion	-5.050376287	5.062476699	31	Angpt2|Bst1|Cxcr4|Ccr1|Ccr2|Ccr7|Csf1r|F7|Fn1|Cxcl10|Il1b|Smad3|Mif|Pdgfb|Padi2|Pgf|Prkca|Sell|Stx3|Thbs1|Pla2g7|Tnfsf14|Cxcl14|Smoc2|P2ry12|Il23a|Mtus1|Mycbp2|Gpr18|Sema6d|Plxna4	-3.021304839
BP	GO:0002685	regulation of leukocyte migration	19_GO:0040011 locomotion	-4.514664142	4.71026672	29	Adam8|Apod|Bst1|Ccr1|Ccr2|Ccr7|Csf1r|Ecm1|F7|Gcsam|Cxcl10|Il1b|Lgals3|Mif|Cd200|Padi2|Pgf|Sell|Thbs1|Tnfrsf18|Tlr2|Pla2g7|Tnfsf14|Cxcl14|P2ry12|Il33|Il23a|Mtus1|Gpr18	-2.601986682
BP	GO:0050921	positive regulation of chemotaxis	19_GO:0040011 locomotion	-4.218144854	4.626130282	22	Cxcr4|Ccr1|Ccr2|Ccr7|Csf1r|F7|Fn1|Cxcl10|Il1b|Smad3|Pdgfb|Pgf|Prkca|Sell|Stx3|Thbs1|Pla2g7|Tnfsf14|Cxcl14|Smoc2|P2ry12|Il23a	-2.372069333
BP	GO:0002688	regulation of leukocyte chemotaxis	19_GO:0040011 locomotion	-4.040101044	4.564063704	19	Bst1|Ccr1|Ccr2|Ccr7|Csf1r|F7|Cxcl10|Il1b|Mif|Padi2|Pgf|Sell|Thbs1|Pla2g7|Tnfsf14|Cxcl14|Il23a|Mtus1|Gpr18	-2.241969524
MF	GO:0005125	cytokine activity		-4.017244918	4.335320129	29	Areg|Csf3|Gdf3|Cxcl1|Cxcl10|Ifng|Il1b|Il1rn|Ltb|Mif|Osm|Ccl6|Ccl7|Ccl9|Cxcl2|Spp1|Timp1|Pglyrp1|Tnfsf9|Tnfsf14|Tslp|Cxcl11|Cxcl14|Cxcl16|Tnfsf13|Il33|Il23a|Cxcl3|Gm13283	-2.226412636
BP	GO:0002690	positive regulation of leukocyte chemotaxis	19_GO:0040011 locomotion	-2.845755202	3.632615962	14	Ccr1|Ccr2|Ccr7|Csf1r|F7|Cxcl10|Il1b|Pgf|Sell|Thbs1|Pla2g7|Tnfsf14|Cxcl14|Il23a	-1.334944535
MF	GO:0030545	receptor regulator activity		-2.726784902	3.168624564	49	Angpt2|Areg|Csf3|Gdf3|Cxcl1|Hbegf|Cxcl10|Ifng|Igf2|Il1b|Il1rn|Lgals3|Ltb|Ly6c1|Mif|Osm|Pdgfb|Pgf|Saa3|Sct|Ccl6|Ccl7|Ccl9|Cxcl2|Spp1|Stc2|Timp1|Pglyrp1|Tnfsf9|Tnfsf14|Tslp|Cxcl11|Ly6i|Retnla|Cxcl14|Cxcl16|Tnfsf13|Flrt3|Il33|Il23a|Gpnmb|Npy|Dut|Ly6a|Metrnl|Sema6d|Cxcl3|Gm13283|Ly6c2	-1.256207659
BP	GO:0002687	positive regulation of leukocyte migration	19_GO:0040011 locomotion	-2.684950023	3.356493835	19	Adam8|Ccr1|Ccr2|Ccr7|Csf1r|F7|Cxcl10|Il1b|Lgals3|Pgf|Sell|Thbs1|Tnfrsf18|Tlr2|Pla2g7|Tnfsf14|Cxcl14|P2ry12|Il23a	-1.22317646
MF	GO:0048018	receptor ligand activity		-2.101151647	2.630144428	43	Areg|Csf3|Gdf3|Cxcl1|Hbegf|Cxcl10|Ifng|Igf2|Il1b|Il1rn|Lgals3|Ltb|Mif|Osm|Pdgfb|Pgf|Saa3|Sct|Ccl6|Ccl7|Ccl9|Cxcl2|Spp1|Stc2|Timp1|Pglyrp1|Tnfsf9|Tnfsf14|Tslp|Cxcl11|Retnla|Cxcl14|Cxcl16|Tnfsf13|Flrt3|Il33|Il23a|Gpnmb|Npy|Metrnl|Sema6d|Cxcl3|Gm13283	-0.82054568
BP	GO:0001817	regulation of cytokine production	19_GO:0032501 multicellular organismal process	-10.4065347	7.393830548	89	Abl1|Acp5|Adam8|Adora2b|Adra2a|Anxa4|Apod|Aqp4|Arg1|Arg2|Tspo|Cd2|Cd24a|Ccr2|Ccr7|Csf1r|Ddit3|Egr1|Epha2|Fcnb|Fgr|Flt3|Fn1|Hpse|Ifi204|Ifng|Il1b|Il1r2|Acod1|Klf4|Lag3|Lpl|Ltb|Ltf|Smad3|Smad7|Mertk|Mif|Cd200|Nfkb1|Cd244a|Nos2|Osm|P2ry2|Pik3r1|Srgn|Rock2|Sphk1|Thbs1|Cd40|Cd27|Tnfrsf8|Tnfrsf9|Pglyrp1|Tnfsf9|Sigirr|Tlr2|Sh2d1b1|Klrk1|Tslp|Irf7|Mefv|Clec4e|Clec4n|Rsad2|Pdcd1lg2|Cd274|Rgcc|Hilpda|Vsir|…	-7.381619211
BP	GO:0001818	negative regulation of cytokine production	19_GO:0048519 negative regulation of biological process	-9.403570081	7.467554662	44	Acp5|Anxa4|Apod|Aqp4|Arg1|Arg2|Tspo|Cd24a|Ccr7|Ddit3|Epha2|Flt3|Fn1|Ifng|Il1r2|Acod1|Klf4|Lag3|Smad7|Mertk|Cd200|Nfkb1|Srgn|Thbs1|Tnfrsf9|Pglyrp1|Sigirr|Tlr2|Sh2d1b1|Mefv|Pdcd1lg2|Cd274|Rgcc|Vsir|Il33|Hdac9|Il23a|Gpnmb|Prg4|Ffar4|Gpr18|Peli3|Bank1|Nav3	-6.574949238
BP	GO:0032655	regulation of interleukin-12 production	19_GO:0032501 multicellular organismal process	-6.062243057	6.477028253	15	Acp5|Ccr7|Flt3|Ifng|Ltb|Nfkb1|Thbs1|Cd40|Tnfrsf9|Tnfsf9|Tlr2|Mefv|Il23a|Tlr3|Scimp	-3.783294135
BP	GO:0032615	interleukin-12 production	19_GO:0032501 multicellular organismal process	-5.663417633	6.138047347	15	Acp5|Ccr7|Flt3|Ifng|Ltb|Nfkb1|Thbs1|Cd40|Tnfrsf9|Tnfsf9|Tlr2|Mefv|Il23a|Tlr3|Scimp	-3.486544566
BP	GO:0001819	positive regulation of cytokine production	19_GO:0048518 positive regulation of biological process	-4.810614652	4.68266912	51	Abl1|Adam8|Adora2b|Adra2a|Cd2|Ccr2|Ccr7|Csf1r|Ddit3|Egr1|Fcnb|Fgr|Flt3|Hpse|Ifi204|Ifng|Il1b|Lpl|Ltb|Smad3|Mif|Cd200|Cd244a|Osm|P2ry2|Pik3r1|Rock2|Sphk1|Thbs1|Cd40|Cd27|Tnfrsf8|Tnfsf9|Tlr2|Klrk1|Tslp|Irf7|Clec4e|Clec4n|Rsad2|Cd274|Rgcc|Hilpda|Il33|Il23a|Tlr3|Ifi205|Setd2|Klre1|Tarm1|Scimp	-2.825207705
BP	GO:0071706	tumor necrosis factor superfamily cytokine production	19_GO:0032501 multicellular organismal process	-4.742093992	4.937181333	26	Acp5|Adam8|Arg2|Tspo|Cd2|Cd24a|Ccr2|Ccr7|Flt3|Ifng|Lpl|Ltf|Mif|Pik3r1|Thbs1|Tnfrsf8|Tlr2|Cd274|Vsir|Il33|Il23a|Gpnmb|Gpr18|Tlr3|Tmem106a|Cd300ld	-2.784125293
BP	GO:1903555	regulation of tumor necrosis factor superfamily cytokine production	19_GO:0032501 multicellular organismal process	-4.545916258	4.811317692	25	Acp5|Adam8|Arg2|Tspo|Cd2|Cd24a|Ccr2|Ccr7|Flt3|Ifng|Lpl|Ltf|Mif|Pik3r1|Thbs1|Tnfrsf8|Tlr2|Cd274|Vsir|Il33|Il23a|Gpnmb|Gpr18|Tlr3|Cd300ld	-2.623663112
BP	GO:0032735	positive regulation of interleukin-12 production	19_GO:0048518 positive regulation of biological process	-4.199465786	5.250029418	10	Ccr7|Flt3|Ifng|Ltb|Cd40|Tnfsf9|Tlr2|Il23a|Tlr3|Scimp	-2.363713585
BP	GO:0032695	negative regulation of interleukin-12 production	19_GO:0048519 negative regulation of biological process	-4.026636494	5.537731001	7	Acp5|Ccr7|Nfkb1|Thbs1|Tnfrsf9|Tlr2|Mefv	-2.233384738
BP	GO:0032640	tumor necrosis factor production	19_GO:0032501 multicellular organismal process	-3.982090708	4.391953881	24	Acp5|Arg2|Tspo|Cd2|Cd24a|Ccr2|Ccr7|Flt3|Ifng|Lpl|Ltf|Mif|Pik3r1|Thbs1|Tnfrsf8|Tlr2|Vsir|Il33|Il23a|Gpnmb|Gpr18|Tlr3|Tmem106a|Cd300ld	-2.201982291
BP	GO:0032680	regulation of tumor necrosis factor production	19_GO:0032501 multicellular organismal process	-3.751749454	4.224734805	23	Acp5|Arg2|Tspo|Cd2|Cd24a|Ccr2|Ccr7|Flt3|Ifng|Lpl|Ltf|Mif|Pik3r1|Thbs1|Tnfrsf8|Tlr2|Vsir|Il33|Il23a|Gpnmb|Gpr18|Tlr3|Cd300ld	-2.03402427
BP	GO:1903557	positive regulation of tumor necrosis factor superfamily cytokine production	19_GO:0048518 positive regulation of biological process	-2.474459932	3.25410273	14	Adam8|Cd2|Ccr2|Ccr7|Ifng|Lpl|Mif|Pik3r1|Thbs1|Tnfrsf8|Tlr2|Il33|Il23a|Tlr3	-1.072793734
BP	GO:0032760	positive regulation of tumor necrosis factor production	19_GO:0048518 positive regulation of biological process	-2.099865952	2.876360672	13	Cd2|Ccr2|Ccr7|Ifng|Lpl|Mif|Pik3r1|Thbs1|Tnfrsf8|Tlr2|Il33|Il23a|Tlr3	-0.82054568
BP	GO:0002683	negative regulation of immune system process	19_GO:0002376 immune system process	-10.26573469	7.534407382	67	Adora2a|Apod|Arg1|Arg2|Cd24a|Cd44|Ccr1|Ccr2|Cst7|Fas|Fgl2|Fgr|Flt3|Gcsam|H2-Aa|H2-Ab1|Hes1|Hmgb3|Ifng|Igf2|Il2ra|Acod1|Mafb|Lag3|Lgals3|Smad7|Mertk|Mif|Cd200|Nme1|Nme2|Padi2|Pik3r1|Pla2g2d|Psmb4|Slfn1|Tap1|Thbs1|Pglyrp1|Nr1h3|Vpreb3|Sh2d1b1|Mfhas1|Htra1|Tob2|Zc3h8|Pdcd1lg2|Cd274|Ubash3b|Vsir|Il33|Klrb1b|Clec2d|Gpnmb|Gpr18|Pilrb1|Plcl2|Gpr55|Gpr171|Inpp4b|Zc3h12d|Bank1|Klre1|Tarm1|Cd300lf|N4bp2l2|…	-7.28032774
BP	GO:0007162	negative regulation of cell adhesion	19_GO:0022610 biological adhesion	-8.635138743	7.024623326	45	Abl1|Adam8|Adora2a|Angpt2|Apod|Arg1|Arg2|Ass1|Cd24a|Cd44|Dmtn|Erbb3|Fgl2|Fzd4|Gcnt2|H2-Aa|H2-Ab1|Il1rn|Il2ra|Itgb1bp1|Klf4|Lag3|Lgals1|Lgals3|Smad7|Pde3b|Pik3r1|Pla2g2d|Slfn1|Thbs1|Coro1c|Zc3h8|Pdcd1lg2|Cd274|Rgcc|Ubash3b|Vsir|Clasp2|Gpnmb|Rasa1|Acer2|Ajap1|Zc3h12d|Plxna4|Tarm1	-5.931456637
BP	GO:0008285	negative regulation of cell proliferation	19_GO:0008283 cell proliferation	-8.100582151	6.361583967	80	Adora2a|Adora2b|Ang|Apod|Arg1|Arg2|Bax|Tspo|Cd24a|Cd44|Cdkn1a|Cdkn2c|Cdkn2d|Csf1r|E2f1|Eng|Fas|Flt3|Fth1|Gja1|Pdpn|Gpld1|Adgrg1|H2-Aa|H2-Ab1|Hes1|Ifng|Igfbp5|Il1b|Il2ra|Itgb1bp1|Klf4|Lgals3|Lrp6|Smad3|Smad7|Mef2c|Cd200|Cited2|Ndrg1|Neurl1a|Pik3r1|Prkca|Pla2g2d|Prox1|Ptprm|Scin|Slfn1|Slfn2|Sod2|Sox4|Sparc|Zeb1|Tgfbr1|Tgfbr2|Thbs1|Trim24|Tnfrsf9|Tob1|Spry1|Tlr2|Prdx4|Hpgds|Tob2|Pdcd1lg2|Cd274|Ptges…	-5.486982195
BP	GO:0002695	negative regulation of leukocyte activation	19_GO:0002376 immune system process	-7.765428844	6.79751604	33	Adora2a|Arg1|Arg2|Cd24a|Cd44|Ccr2|Cst7|Fas|Fgl2|Fgr|Flt3|H2-Aa|H2-Ab1|Hmgb3|Il2ra|Lag3|Lgals3|Smad7|Mertk|Cd200|Pla2g2d|Slfn1|Pglyrp1|Nr1h3|Zc3h8|Pdcd1lg2|Cd274|Vsir|Gpnmb|Zc3h12d|Bank1|Tarm1|Cd300lf	-5.210685751
BP	GO:0050866	negative regulation of cell activation	19_GO:0048519 negative regulation of biological process	-7.658816015	6.677551158	35	Adora2a|Arg1|Arg2|Cd24a|Cd44|Ccr2|Cst7|Fas|Fgl2|Fgr|Flt3|H2-Aa|H2-Ab1|Hmgb3|Il2ra|Lag3|Lgals3|Smad7|Mertk|Cd200|Pdgfb|Pla2g2d|Slfn1|Pglyrp1|Nr1h3|Zc3h8|Pdcd1lg2|Cd274|Ubash3b|Vsir|Gpnmb|Zc3h12d|Bank1|Tarm1|Cd300lf	-5.131225168
BP	GO:0051250	negative regulation of lymphocyte activation	19_GO:0002376 immune system process	-6.829606319	6.350462654	28	Adora2a|Arg1|Arg2|Cd24a|Cd44|Fas|Fgl2|Fgr|Flt3|H2-Aa|H2-Ab1|Hmgb3|Il2ra|Lag3|Lgals3|Smad7|Mertk|Pla2g2d|Slfn1|Pglyrp1|Zc3h8|Pdcd1lg2|Cd274|Vsir|Gpnmb|Zc3h12d|Bank1|Tarm1	-4.446259364
BP	GO:1903038	negative regulation of leukocyte cell-cell adhesion	19_GO:0022610 biological adhesion	-6.034258627	5.938117844	24	Adam8|Adora2a|Arg1|Arg2|Ass1|Cd24a|Cd44|Fgl2|H2-Aa|H2-Ab1|Il2ra|Klf4|Lag3|Lgals3|Smad7|Pla2g2d|Slfn1|Zc3h8|Pdcd1lg2|Cd274|Vsir|Gpnmb|Zc3h12d|Tarm1	-3.770632171
BP	GO:0022408	negative regulation of cell-cell adhesion	19_GO:0022610 biological adhesion	-5.557843497	5.457575825	29	Abl1|Adam8|Adora2a|Arg1|Arg2|Ass1|Cd24a|Cd44|Fgl2|H2-Aa|H2-Ab1|Il1rn|Il2ra|Klf4|Lag3|Lgals3|Smad7|Pik3r1|Pla2g2d|Slfn1|Zc3h8|Pdcd1lg2|Cd274|Rgcc|Ubash3b|Vsir|Gpnmb|Zc3h12d|Tarm1	-3.401040412
BP	GO:0046633	alpha-beta T cell proliferation	19_GO:0008283 cell proliferation	-5.34382019	6.145447219	12	Arg2|Cd24a|Cd44|Ccr2|Lilrb4a|Cd244a|Tgfbr2|Cd274|Vsir|Il23a|Tarm1|Rasal3	-3.229681517
BP	GO:0035739	CD4-positive, alpha-beta T cell proliferation	19_GO:0008283 cell proliferation	-5.244746796	7.018854779	7	Arg2|Cd44|Lilrb4a|Tgfbr2|Cd274|Vsir|Tarm1	-3.162429836
BP	GO:0046640	regulation of alpha-beta T cell proliferation	19_GO:0008283 cell proliferation	-5.115213044	6.049258243	11	Arg2|Cd24a|Cd44|Ccr2|Cd244a|Tgfbr2|Cd274|Vsir|Il23a|Tarm1|Rasal3	-3.07342963
BP	GO:0050868	negative regulation of T cell activation	19_GO:0022610 biological adhesion	-5.080176304	5.335980428	21	Adora2a|Arg1|Arg2|Cd24a|Cd44|Fgl2|H2-Aa|H2-Ab1|Il2ra|Lag3|Lgals3|Smad7|Pla2g2d|Slfn1|Zc3h8|Pdcd1lg2|Cd274|Vsir|Gpnmb|Zc3h12d|Tarm1	-3.044795382
BP	GO:0042130	negative regulation of T cell proliferation	19_GO:0022610 biological adhesion	-4.733997963	5.335851495	15	Arg1|Arg2|Cd24a|Cd44|H2-Aa|H2-Ab1|Il2ra|Pla2g2d|Slfn1|Pdcd1lg2|Cd274|Vsir|Gpnmb|Zc3h12d|Tarm1	-2.779560133
BP	GO:2000561	regulation of CD4-positive, alpha-beta T cell proliferation	19_GO:0008283 cell proliferation	-4.556497039	6.497880549	6	Arg2|Cd44|Tgfbr2|Cd274|Vsir|Tarm1	-2.630966183
BP	GO:0046631	alpha-beta T cell activation	19_GO:0002376 immune system process	-4.265266422	4.616370582	24	Abl1|Adora2a|Arg2|Cd24a|Cd44|Ccr2|Ccr7|Lilrb4a|H2-Ab1|Ifng|Il2rg|Smad7|Cd244a|Pla2g2d|Tgfbr2|Gadd45g|Rsad2|Cd274|Vsir|Il23a|Gpr18|Ankle1|Tarm1|Rasal3	-2.408090118
BP	GO:0046634	regulation of alpha-beta T cell activation	19_GO:0002376 immune system process	-4.251762776	4.776762652	18	Adora2a|Arg2|Cd24a|Cd44|Ccr2|Ccr7|H2-Ab1|Ifng|Il2rg|Smad7|Cd244a|Tgfbr2|Cd274|Vsir|Il23a|Ankle1|Tarm1|Rasal3	-2.402938547
BP	GO:2000562	negative regulation of CD4-positive, alpha-beta T cell proliferation	19_GO:0022610 biological adhesion	-4.142539178	6.335470824	5	Arg2|Cd44|Cd274|Vsir|Tarm1	-2.316542479
BP	GO:0070664	negative regulation of leukocyte proliferation	19_GO:0008283 cell proliferation	-3.957685136	4.601357579	16	Arg1|Arg2|Cd24a|Cd44|H2-Aa|H2-Ab1|Il2ra|Pla2g2d|Slfn1|Pdcd1lg2|Cd274|Vsir|Il33|Gpnmb|Zc3h12d|Tarm1	-2.184581621
BP	GO:0050672	negative regulation of lymphocyte proliferation	19_GO:0008283 cell proliferation	-3.754454099	4.461092879	15	Arg1|Arg2|Cd24a|Cd44|H2-Aa|H2-Ab1|Il2ra|Pla2g2d|Slfn1|Pdcd1lg2|Cd274|Vsir|Gpnmb|Zc3h12d|Tarm1	-2.035708246
BP	GO:0032945	negative regulation of mononuclear cell proliferation	19_GO:0008283 cell proliferation	-3.698187707	4.4095147	15	Arg1|Arg2|Cd24a|Cd44|H2-Aa|H2-Ab1|Il2ra|Pla2g2d|Slfn1|Pdcd1lg2|Cd274|Vsir|Gpnmb|Zc3h12d|Tarm1	-1.996475193
BP	GO:2000514	regulation of CD4-positive, alpha-beta T cell activation	19_GO:0002376 immune system process	-3.318984594	4.19201317	12	Arg2|Cd44|Ccr2|Ccr7|Ifng|Il2rg|Smad7|Tgfbr2|Cd274|Vsir|Il23a|Tarm1	-1.696125681
BP	GO:0035710	CD4-positive, alpha-beta T cell activation	19_GO:0002376 immune system process	-3.248027878	3.956619282	16	Arg2|Cd44|Ccr2|Ccr7|Lilrb4a|Ifng|Il2rg|Smad7|Pla2g2d|Tgfbr2|Gadd45g|Rsad2|Cd274|Vsir|Il23a|Tarm1	-1.639166875
BP	GO:0046642	negative regulation of alpha-beta T cell proliferation	19_GO:0022610 biological adhesion	-3.04914493	4.746156456	5	Arg2|Cd44|Cd274|Vsir|Tarm1	-1.488051357
BP	GO:0036037	CD8-positive, alpha-beta T cell activation	19_GO:0002376 immune system process	-2.072359886	3.191025483	6	Lilrb4a|Ifng|Cd244a|Cd274|Vsir|Gpr18	-0.798943453
BP	GO:2000515	negative regulation of CD4-positive, alpha-beta T cell activation	19_GO:0022610 biological adhesion	-2.003851709	3.096624659	6	Arg2|Cd44|Smad7|Cd274|Vsir|Tarm1	-0.752234969
BP	GO:0051347	positive regulation of transferase activity	19_GO:0065007 biological regulation	-9.160857518	6.929840153	74	Abl1|Acvr2b|Adam8|Adra2a|Adra2b|Ang|Areg|Cd24a|Cdc25b|Cdk5r1|Cdkn1a|Ccr7|Csf1r|Ect2|Efna1|Egr1|Epha2|Erbb3|Fgr|Flt3|Fzd4|Hbegf|Hsp90aa1|Ifng|Igf2|Igfbp6|Il1b|Il1rn|Itgb1bp1|Mdfic|Kit|Klf4|Rps2|Ltf|Mertk|Mif|Cd200|Nek2|Neurl1a|Pdgfb|Pim1|Plk1|Prox1|Aurkb|Tgfbr1|Tgfbr2|Thbs1|Cd40|Vav2|Gadd45g|Fgd2|Map3k12|Map3k4|Map4k1|Cks1b|Rgcc|Arrdc4|Mmd|Etaa1|Tab2|Tcim|Avpi1|Tpx2|Rfc5|Mlkl|Il23a|Rfc4|Cdc20|Chtf…	-6.370025236
BP	GO:0043549	regulation of kinase activity	19_GO:0008152 metabolic process	-8.466703019	6.499807546	87	Abl1|Acvr2b|Adam8|Adora2a|Adra2a|Adra2b|Ang|Fabp4|Areg|Ccna2|Ccnb2|Ccne1|Ccnf|Cd24a|Cdc25b|Cdk5r1|Cdkn1a|Cdkn1c|Cdkn2c|Cdkn2d|Ccr7|Csf1r|Ect2|Efna1|Egr1|Epha2|Erbb3|Fgr|Flt3|Fzd4|Hbegf|Hsp90aa1|Ifng|Igfbp6|Il1b|Il1rn|Itgb1bp1|Mdfic|Kit|Lrp6|Ltf|Mertk|Mif|Neurl1a|Pdgfb|Pik3r1|Pim1|Prkca|Plk1|Prox1|Psen2|Rgs2|Tgfbr1|Tgfbr2|Thbs1|Cd40|Vav2|Coro1c|Gadd45g|Spry1|Fgd2|Map3k12|Map3k4|Map4k1|Cks1b|Chp1|R…	-5.791666094
BP	GO:0045859	regulation of protein kinase activity	19_GO:0008152 metabolic process	-8.441644869	6.538223101	79	Abl1|Acvr2b|Adam8|Adora2a|Adra2a|Adra2b|Ang|Fabp4|Areg|Ccna2|Ccnb2|Ccne1|Ccnf|Cd24a|Cdc25b|Cdk5r1|Cdkn1a|Cdkn1c|Cdkn2c|Cdkn2d|Ccr7|Csf1r|Ect2|Efna1|Egr1|Erbb3|Fgr|Fzd4|Hbegf|Hsp90aa1|Ifng|Igfbp6|Il1b|Il1rn|Itgb1bp1|Mdfic|Kit|Lrp6|Ltf|Mif|Neurl1a|Pdgfb|Pim1|Prkca|Plk1|Prox1|Psen2|Rgs2|Tgfbr1|Tgfbr2|Thbs1|Cd40|Coro1c|Gadd45g|Spry1|Fgd2|Map3k12|Map3k4|Map4k1|Cks1b|Chp1|Rgcc|Mmd|Etaa1|Tab2|Tcim|Avpi1…	-5.775751323
BP	GO:0033674	positive regulation of kinase activity	19_GO:0048518 positive regulation of biological process	-6.891345435	5.85925456	61	Abl1|Acvr2b|Adam8|Adra2a|Adra2b|Ang|Areg|Cd24a|Cdc25b|Cdk5r1|Cdkn1a|Ccr7|Csf1r|Ect2|Efna1|Egr1|Epha2|Erbb3|Fgr|Flt3|Fzd4|Hbegf|Hsp90aa1|Ifng|Igfbp6|Il1b|Il1rn|Itgb1bp1|Mdfic|Kit|Ltf|Mertk|Mif|Neurl1a|Pdgfb|Pim1|Prox1|Tgfbr1|Tgfbr2|Thbs1|Cd40|Vav2|Gadd45g|Fgd2|Map3k12|Map3k4|Map4k1|Cks1b|Rgcc|Mmd|Etaa1|Tab2|Tcim|Avpi1|Tpx2|Mlkl|Il23a|Ppp1r9a|Tigar|Atp2b4|Pifo	-4.498453161
BP	GO:0045860	positive regulation of protein kinase activity	19_GO:0048518 positive regulation of biological process	-6.54547864	5.723905709	54	Abl1|Acvr2b|Adam8|Adra2a|Adra2b|Ang|Areg|Cd24a|Cdc25b|Cdk5r1|Cdkn1a|Ccr7|Csf1r|Ect2|Efna1|Egr1|Erbb3|Fzd4|Hbegf|Hsp90aa1|Ifng|Igfbp6|Il1b|Il1rn|Itgb1bp1|Mdfic|Kit|Ltf|Mif|Neurl1a|Pdgfb|Pim1|Prox1|Tgfbr1|Tgfbr2|Thbs1|Cd40|Gadd45g|Fgd2|Map3k12|Map3k4|Map4k1|Cks1b|Rgcc|Mmd|Etaa1|Tab2|Tcim|Avpi1|Tpx2|Mlkl|Il23a|Ppp1r9a|Atp2b4	-4.209892286
BP	GO:0071900	regulation of protein serine/threonine kinase activity	19_GO:0008152 metabolic process	-5.452575792	5.093117744	51	Abl1|Adam8|Adra2a|Adra2b|Ccna2|Ccnb2|Ccne1|Ccnf|Cd24a|Cdkn1a|Cdkn1c|Cdkn2c|Cdkn2d|Ccr7|Csf1r|Fzd4|Ifng|Igfbp6|Il1b|Il1rn|Mdfic|Kit|Lrp6|Ltf|Mif|Pdgfb|Pim1|Prkca|Plk1|Prox1|Rgs2|Tgfbr1|Thbs1|Cd40|Gadd45g|Spry1|Fgd2|Map3k12|Map3k4|Map4k1|Cks1b|Rgcc|Etaa1|Tcim|Avpi1|Mlkl|Hexim1|Trib3|Dusp7|Ccnb1|Atp2b4	-3.312266886
BP	GO:0043408	regulation of MAPK cascade	19_GO:0023052 signaling	-4.075912243	4.112814868	68	Abl1|Adam8|Adra2a|Adra2b|Atf3|Cd24a|Cd44|Ccr1|Ccr7|Csf1r|Efna1|Epha2|Fas|Fn1|Fzd4|Gcnt2|Igf2|Igfbp6|Il1b|Il1rn|Itgb1bp1|Mdfic|Kit|Klf4|Lmnb1|Mif|Osm|Prdx1|Pdgfb|Prkca|Rgs2|Rock2|Ccl6|Ccl7|Ccl9|Sphk1|Tgfbr1|Thbs1|Cd40|Cd27|Traf1|Traf5|Gadd45g|Spry1|Tlr2|Fgd2|Map3k12|Map3k4|Map4k1|Pbk|Mfhas1|Ramp3|Rnf149|Avpi1|Mlkl|Gpnmb|Ffar4|Prdm15|Tlr3|Gpr37l1|Tmem106a|Gpr55|Trib3|Dusp7|Bank1|Scimp|Glipr2|Prdm11	-2.262899003
BP	GO:0043410	positive regulation of MAPK cascade	19_GO:0048518 positive regulation of biological process	-4.072195237	4.172612506	53	Abl1|Adam8|Adra2a|Adra2b|Cd24a|Cd44|Ccr1|Ccr7|Csf1r|Efna1|Fzd4|Gcnt2|Igf2|Igfbp6|Il1b|Il1rn|Mdfic|Kit|Lmnb1|Mif|Osm|Pdgfb|Prkca|Rock2|Ccl6|Ccl7|Ccl9|Sphk1|Tgfbr1|Thbs1|Cd40|Cd27|Traf1|Traf5|Gadd45g|Tlr2|Fgd2|Map3k12|Map3k4|Map4k1|Mfhas1|Ramp3|Avpi1|Mlkl|Gpnmb|Ffar4|Tlr3|Gpr37l1|Tmem106a|Gpr55|Bank1|Scimp|Glipr2	-2.262879549
BP	GO:0000165	MAPK cascade	19_GO:0023052 signaling	-3.650885077	3.812691588	70	Abl1|Adam8|Adra2a|Adra2b|Atf3|Cd24a|Cd44|Ccr1|Ccr7|Csf1r|Efna1|Epha2|Fas|Fn1|Fzd4|Gcnt2|Igf2|Igfbp6|Il1b|Il1rn|Itgb1bp1|Mdfic|Kit|Klf4|Lmnb1|Mef2c|Mif|Osm|Prdx1|Pdgfb|Prkca|Rgs2|Rock2|Ccl6|Ccl7|Ccl9|Sphk1|Tgfbr1|Thbs1|Cd40|Cd27|Traf1|Traf5|Gadd45g|Spry1|Tlr2|Fgd2|Map3k12|Map3k4|Map4k1|Pbk|Mfhas1|Ramp3|Rnf149|Avpi1|Mlkl|Gpnmb|Ffar4|Prdm15|Tlr3|Gpr37l1|Tmem106a|Gpr55|Trib3|Dusp7|Ppm1l|Bank1|Scimp|G…	-1.962834977
BP	GO:0071902	positive regulation of protein serine/threonine kinase activity	19_GO:0048518 positive regulation of biological process	-3.600541368	3.965161434	33	Adam8|Adra2a|Adra2b|Cd24a|Ccr7|Csf1r|Fzd4|Ifng|Igfbp6|Il1b|Il1rn|Mdfic|Kit|Ltf|Mif|Pdgfb|Pim1|Prox1|Tgfbr1|Thbs1|Cd40|Gadd45g|Fgd2|Map3k12|Map3k4|Map4k1|Cks1b|Rgcc|Etaa1|Tcim|Avpi1|Mlkl|Atp2b4	-1.923652438
BP	GO:0023014	signal transduction by protein phosphorylation	19_GO:0023052 signaling	-3.490846903	3.698231162	70	Abl1|Adam8|Adra2a|Adra2b|Atf3|Cd24a|Cd44|Ccr1|Ccr7|Csf1r|Efna1|Epha2|Fas|Fn1|Fzd4|Gcnt2|Igf2|Igfbp6|Il1b|Il1rn|Itgb1bp1|Mdfic|Kit|Klf4|Lmnb1|Mef2c|Mif|Osm|Prdx1|Pdgfb|Prkca|Rgs2|Rock2|Ccl6|Ccl7|Ccl9|Sphk1|Tgfbr1|Thbs1|Cd40|Cd27|Traf1|Traf5|Gadd45g|Spry1|Tlr2|Fgd2|Map3k12|Map3k4|Map4k1|Pbk|Mfhas1|Ramp3|Rnf149|Avpi1|Mlkl|Gpnmb|Ffar4|Prdm15|Tlr3|Gpr37l1|Tmem106a|Gpr55|Trib3|Dusp7|Ppm1l|Bank1|Scimp|G…	-1.834793613
BP	GO:0046330	positive regulation of JNK cascade	19_GO:0048518 positive regulation of biological process	-2.384265496	3.095702739	17	Ccr7|Fzd4|Il1b|Il1rn|Mdfic|Lmnb1|Cd27|Traf1|Traf5|Gadd45g|Fgd2|Map3k12|Map3k4|Map4k1|Mfhas1|Mlkl|Tlr3	-1.017212825
BP	GO:0032874	positive regulation of stress-activated MAPK cascade	19_GO:0048518 positive regulation of biological process	-2.241217635	2.919154496	19	Ccr7|Fzd4|Il1b|Il1rn|Mdfic|Lmnb1|Sphk1|Cd27|Traf1|Traf5|Gadd45g|Fgd2|Map3k12|Map3k4|Map4k1|Mfhas1|Mlkl|Tlr3|Scimp	-0.914396578
BP	GO:0070304	positive regulation of stress-activated protein kinase signaling cascade	19_GO:0048518 positive regulation of biological process	-2.187598808	2.864204685	19	Ccr7|Fzd4|Il1b|Il1rn|Mdfic|Lmnb1|Sphk1|Cd27|Traf1|Traf5|Gadd45g|Fgd2|Map3k12|Map3k4|Map4k1|Mfhas1|Mlkl|Tlr3|Scimp	-0.883039537
BP	GO:0043406	positive regulation of MAP kinase activity	19_GO:0048518 positive regulation of biological process	-2.1057615	2.737581914	23	Adam8|Adra2a|Adra2b|Cd24a|Ccr7|Fzd4|Igfbp6|Il1b|Il1rn|Mdfic|Kit|Mif|Pdgfb|Tgfbr1|Thbs1|Cd40|Gadd45g|Fgd2|Map3k12|Map3k4|Map4k1|Avpi1|Mlkl	-0.821960076
BP	GO:0032147	activation of protein kinase activity	19_GO:0048518 positive regulation of biological process	-2.020235706	2.641664925	24	Abl1|Acvr2b|Adra2a|Adra2b|Ang|Ccr7|Ect2|Igfbp6|Il1b|Itgb1bp1|Mdfic|Kit|Pdgfb|Tgfbr1|Tgfbr2|Thbs1|Gadd45g|Map3k12|Map3k4|Map4k1|Avpi1|Tpx2|Mlkl|Il23a	-0.761594635
BP	GO:0031349	positive regulation of defense response	19_GO:0048518 positive regulation of biological process	-8.513428051	6.814306986	54	Adam8|Adora2b|Fabp4|Arg1|Cd24a|Ccr2|Ccr7|Fcnb|Gja1|Cxcl1|Hmgb3|Ifi204|Ifng|Il1b|Acod1|Lag3|Lpl|Ltf|Mef2c|Mif|Osm|Prkca|S100a8|S100a9|Tgm2|Cd40|Plscr1|Nr1h3|Ets1|Tlr2|Sh2d1b1|Klrk1|Mfhas1|Tslp|Irf7|Ikbke|Clec4e|Rsad2|Zbp1|Sfpq|Rftn1|Il33|Cdk19|Tlr3|Hexim1|Pde2a|Ifi205|Ifi209|Peli3|Klre1|Tarm1|Cd300lf|Scimp|Ifi208	-5.819505782
BP	GO:0045088	regulation of innate immune response	19_GO:0002376 immune system process	-5.694808414	5.37320775	39	Adam8|Arg1|Ccr1|Fcnb|Fgr|Hmgb3|Ifi204|Igf2|Acod1|Lag3|Ltf|Tap1|Cd40|Plscr1|Nr1h3|Tlr2|Sh2d1b1|Klrk1|Mfhas1|Irf7|Ikbke|Clec4e|Rsad2|Zbp1|Sfpq|Rftn1|Klrb1b|Clec2d|Tlr3|Hexim1|Ifi205|Ifi209|Peli3|Klre1|Cd300lf|B430306N03Rik|Scimp|A530064D06Rik|Ifi208	-3.509041634
BP	GO:0045089	positive regulation of innate immune response	19_GO:0002376 immune system process	-4.099560175	4.38410494	30	Adam8|Fcnb|Hmgb3|Ifi204|Acod1|Lag3|Ltf|Cd40|Plscr1|Nr1h3|Tlr2|Sh2d1b1|Klrk1|Mfhas1|Irf7|Ikbke|Clec4e|Rsad2|Zbp1|Sfpq|Rftn1|Tlr3|Hexim1|Ifi205|Ifi209|Peli3|Klre1|Cd300lf|Scimp|Ifi208	-2.280055293
BP	GO:0050778	positive regulation of immune response	19_GO:0002376 immune system process	-4.07722308	4.100760183	72	Abl1|Adam8|Adora2b|Cd5l|Bax|Bcl2a1d|Cacnb3|Cd24a|Cd38|Cd44|Cfh|Ccr2|Ccr7|Fcnb|Fgr|Gcsam|Gpld1|H2-Ab1|Cfb|H2-T10|H2-T22|Hmgb3|Ifi204|Ifng|Il1b|Acod1|Kcnn4|Lag3|Lck|Lgals3|Ltf|Blnk|Mef2c|Mif|Cfp|Plcg1|Psen2|Cd40|Plscr1|Nr1h3|Tlr2|Sh2d1b1|Klrk1|Trp53bp1|Mfhas1|Irf7|Ikbke|Clec4e|Rsad2|Zbp1|Cd274|Rgcc|Tnfsf13|Sfpq|Shld2|Rftn1|Il33|Il23a|Tlr3|Hexim1|Plcl2|Ifi205|Kmt5c|Ifi209|Peli3|Klre1|Cd300lf|Scimp|G…	-2.262899003
BP	GO:0002218	activation of innate immune response	19_GO:0002376 immune system process	-3.904708039	4.329790455	24	Fcnb|Ifi204|Acod1|Ltf|Cd40|Nr1h3|Tlr2|Klrk1|Mfhas1|Irf7|Clec4e|Rsad2|Zbp1|Sfpq|Rftn1|Tlr3|Hexim1|Ifi205|Ifi209|Peli3|Klre1|Cd300lf|Scimp|Ifi208	-2.144218179
BP	GO:0002253	activation of immune response	19_GO:0002376 immune system process	-2.475150562	2.95653554	48	Abl1|Cd5l|Bax|Bcl2a1d|Cacnb3|Cd38|Cfh|Ccr7|Fcnb|Gcsam|Gpld1|Cfb|Ifi204|Ifng|Il1b|Acod1|Kcnn4|Lck|Lgals3|Ltf|Blnk|Mef2c|Cfp|Plcg1|Psen2|Cd40|Plscr1|Nr1h3|Tlr2|Klrk1|Mfhas1|Irf7|Clec4e|Rsad2|Zbp1|Rgcc|Sfpq|Rftn1|Tlr3|Hexim1|Plcl2|Ifi205|Ifi209|Peli3|Klre1|Cd300lf|Scimp|Ifi208	-1.072991688
BP	GO:0002758	innate immune response-activating signal transduction	19_GO:0002376 immune system process	-2.117442311	2.818941009	17	Fcnb|Acod1|Ltf|Cd40|Nr1h3|Tlr2|Klrk1|Mfhas1|Irf7|Clec4e|Rsad2|Rftn1|Tlr3|Peli3|Klre1|Cd300lf|Scimp	-0.831005369
BP	GO:0043068	positive regulation of programmed cell death	19_GO:0048518 positive regulation of biological process	-8.093754288	6.384711585	76	Abl1|Adam8|Adora2a|Anxa5|Rhob|Atf3|Bax|Bub1|Tspo|Cd24a|Cd44|Cdk5r1|Cdkn1a|Ddit3|E2f1|Ect2|Egr1|Fas|Rack1|Gpld1|Nr3c1|Gzma|Hpgd|Id3|Ifit2|Ifng|Il1b|Lck|Lrp6|Smad3|Mef2c|Melk|Neurl1a|Osm|Plcg1|Ppp1ca|Psen2|S100a8|S100a9|Scin|Sod2|Sox4|Tgfbr1|Tgm2|Thbs1|Cd40|Tnfrsf8|Plscr1|Gadd45g|Zfp346|Klrk1|Phlda3|Bin1|Siva1|Htatip2|Net1|Mtch2|Zc3h8|Zbp1|Cd274|Rgcc|Prelid1|Ecscr|Aifm2|Sfpq|Plekhf1|Cdk19|Hcar2|Fni…	-5.486982195
BP	GO:0043065	positive regulation of apoptotic process	19_GO:0048518 positive regulation of biological process	-7.549618064	6.11869207	74	Abl1|Adam8|Adora2a|Anxa5|Rhob|Atf3|Bax|Bub1|Tspo|Cd24a|Cd44|Cdk5r1|Ddit3|E2f1|Ect2|Egr1|Fas|Rack1|Gpld1|Nr3c1|Gzma|Hpgd|Id3|Ifit2|Ifng|Il1b|Lck|Lrp6|Smad3|Mef2c|Melk|Neurl1a|Osm|Plcg1|Ppp1ca|Psen2|S100a8|S100a9|Scin|Sod2|Sox4|Tgfbr1|Tgm2|Thbs1|Cd40|Tnfrsf8|Plscr1|Gadd45g|Zfp346|Klrk1|Phlda3|Bin1|Siva1|Net1|Mtch2|Zc3h8|Zbp1|Cd274|Rgcc|Prelid1|Ecscr|Aifm2|Sfpq|Plekhf1|Cdk19|Hcar2|Fnip1|Gsn|Adamtsl4…	-5.041332372
BP	GO:0010942	positive regulation of cell death	19_GO:0048518 positive regulation of biological process	-7.313762313	5.964970576	79	Abl1|Adam8|Adora2a|Anxa5|Rhob|Atf3|Bax|Bub1|Tspo|Cd24a|Cd44|Cdk5r1|Cdkn1a|Ddit3|Dnmt3a|E2f1|Ect2|Egr1|Fas|Rack1|Gpld1|Nr3c1|Gzma|Hpgd|Id3|Ifit2|Ifng|Il1b|Lck|Lrp6|Smad3|Mef2c|Melk|Neurl1a|Osm|Plcg1|Ppp1ca|Psen2|S100a8|S100a9|Scin|Sod2|Sox4|Tgfbr1|Tgm2|Thbs1|Cd40|Tnfrsf8|Plscr1|Gadd45g|Zfp346|Klrk1|Phlda3|Bin1|Siva1|Htatip2|Ramp3|Net1|Mtch2|Zc3h8|Zbp1|Cd274|Rgcc|Prelid1|Ecscr|Aifm2|Sfpq|Plekhf1|Cd…	-4.843346116
BP	GO:0097190	apoptotic signaling pathway	19_GO:0023052 signaling	-5.207259115	4.857292106	64	Adora2a|Atf3|Bax|Bcl2a1d|Bub1|Cd24a|Cd44|Cdkn1a|Cdkn2d|Crip1|Ddit3|E2f1|Epha2|Erbb3|Eya1|Eya4|Fas|Fxn|Rack1|Gzmb|Hells|Hint1|Ifi204|Ifng|Il1b|Lck|Lcn2|Lgals3|Smad3|Melk|Mif|Osm|Pik3r1|Prkca|Ppp1ca|Psen2|Rock2|S100a8|S100a9|Sod2|Tgfbr1|Thbs1|Cd27|Traf1|Plscr1|Phlda3|Siva1|Asah2|Mtch2|Ikbke|Fignl1|Prelid1|Shisa5|Chac1|Sfpq|Plekhf1|Ifi27l2a|Il33|Tlr3|Gsn|Trib3|Peli3|Tnfrsf26|Parl	-3.136586136
BP	GO:0008630	intrinsic apoptotic signaling pathway in response to DNA damage	19_GO:0023052 signaling	-3.589064039	4.236224555	17	Bax|Bcl2a1d|Cd44|Cdkn1a|Cdkn2d|Crip1|E2f1|Epha2|Ifi204|Mif|Pik3r1|Sod2|Plscr1|Phlda3|Mtch2|Ikbke|Shisa5	-1.914950163
BP	GO:0097193	intrinsic apoptotic signaling pathway	19_GO:0023052 signaling	-3.519169145	3.901263446	33	Bax|Bcl2a1d|Bub1|Cd44|Cdkn1a|Cdkn2d|Crip1|Ddit3|E2f1|Epha2|Rack1|Hells|Hint1|Ifi204|Lck|Melk|Mif|Pik3r1|Prkca|S100a8|S100a9|Sod2|Plscr1|Phlda3|Mtch2|Ikbke|Fignl1|Shisa5|Chac1|Sfpq|Plekhf1|Trib3|Parl	-1.857776101
BP	GO:2001235	positive regulation of apoptotic signaling pathway	19_GO:0048518 positive regulation of biological process	-2.911371132	3.518667366	22	Adora2a|Atf3|Bax|Bub1|Ddit3|Fas|Rack1|Lck|Smad3|Osm|Ppp1ca|Psen2|S100a8|S100a9|Tgfbr1|Thbs1|Plscr1|Siva1|Mtch2|Sfpq|Plekhf1|Gsn	-1.377149706
BP	GO:2001244	positive regulation of intrinsic apoptotic signaling pathway	19_GO:0048518 positive regulation of biological process	-2.712801202	3.614525353	11	Bax|Bub1|Ddit3|Rack1|Lck|S100a8|S100a9|Plscr1|Mtch2|Sfpq|Plekhf1	-1.247051076
BP	GO:2001233	regulation of apoptotic signaling pathway	19_GO:0023052 signaling	-2.367169865	2.897035661	38	Adora2a|Atf3|Bax|Bub1|Cd44|Cdkn2d|Ddit3|Eya1|Eya4|Fas|Fxn|Rack1|Hells|Il1b|Lck|Lgals3|Smad3|Mif|Osm|Ppp1ca|Psen2|S100a8|S100a9|Sod2|Tgfbr1|Thbs1|Traf1|Plscr1|Siva1|Asah2|Mtch2|Fignl1|Prelid1|Sfpq|Plekhf1|Gsn|Peli3|Parl	-1.006747555
BP	GO:2001242	regulation of intrinsic apoptotic signaling pathway	19_GO:0023052 signaling	-2.019884856	2.701055969	18	Bax|Bub1|Cd44|Cdkn2d|Ddit3|Rack1|Hells|Lck|Mif|S100a8|S100a9|Sod2|Plscr1|Mtch2|Fignl1|Sfpq|Plekhf1|Parl	-0.761594635
MF	GO:0019901	protein kinase binding		-7.794469569	6.189317885	83	Abl1|Adra2a|Angpt2|Anxa5|Rhob|Cacnb3|Ctnnd1|Ccna2|Ccne1|Cd2|Cd24a|Cd44|Cdc25b|Cdk5r1|Cdkn1a|Cdkn2c|Cdkn2d|Ctbp2|E2f1|Fgr|Gcsam|Gch1|Gdf3|Gja1|Rack1|Nr3c1|Gtf2i|Hes1|Hsp90aa1|Itgax|Itgb1bp1|Jup|Lck|Lmnb1|Blnk|Marcks|Smad3|Rab8a|ND2|Nme1|Nos2|Pde3b|Pik3r1|Plcg1|Plk1|Prkab1|Kif20a|Rps18|Sh3gl2|Aurka|Tgfbr2|Tob1|Vim|Sufu|Map3k12|Racgap1|Cks1b|Rgcc|Rhobtb1|Fam83g|Tpx2|Rnd3|Mlkl|Clasp2|Kidins220|Hdac9|…	-5.232664621
BP	GO:0051607	defense response to virus	19_GO:0051704 multi-organism process	-7.684290372	6.621794689	38	Fgl2|Cxcl10|Ifit1|Ifit2|Ifit3|Ifng|Il1b|Il2ra|Acod1|Itgax|Ncr1|Cd40|Plscr1|Oas1g|Oasl2|Irf7|Htra1|Isg20|Rsad2|Zbp1|Ifitm3|Ddx17|Rtp4|Ifitm1|Tagap|Mlkl|Il33|Ifitm2|Il23a|Rnf216|Tlr3|Oasl1|Setd2|Oas3|Oas1a|Ifit3b|Ifit1bl1|Isg15	-5.150068946
BP	GO:0009615	response to virus	19_GO:0051704 multi-organism process	-7.39643024	6.37312484	42	Fgl2|Flt3|Cxcl10|Ifit1|Ifit2|Ifit3|Ifng|Il1b|Il2ra|Acod1|Itgax|Lcn2|Ncr1|Cd40|Plscr1|Oas1g|Oasl2|Irf7|Htra1|Ikbke|Isg20|Rsad2|Zbp1|Ifitm3|Ddx17|Rtp4|Ifitm1|Tagap|Mlkl|Ifi27l2a|Il33|Ifitm2|Il23a|Rnf216|Tlr3|Oasl1|Setd2|Oas3|Oas1a|Ifit3b|Ifit1bl1|Isg15	-4.918527177
BP	GO:1903901	negative regulation of viral life cycle	19_GO:0051704 multi-organism process	-7.309667306	7.067822416	20	Fcnb|Ltf|Prox1|Slpi|Plscr1|Trim26|Oas1g|Oasl2|Isg20|Rsad2|Ifitm3|Trim59|Ifitm1|Ifitm2|Tasor|Gsn|Oasl1|Oas3|Oas1a|Isg15	-4.843346116
BP	GO:0043901	negative regulation of multi-organism process	19_GO:0051704 multi-organism process	-7.051698299	6.433911864	30	Arg2|Anxa2|Fcnb|Fgl2|Gja1|Il2ra|Acod1|Ltf|Prox1|Slpi|Timp1|Plscr1|Trim26|Oas1g|Oasl2|Prdx4|Hpgds|Htra1|Isg20|Rsad2|Ifitm3|Trim59|Ifitm1|Ifitm2|Tasor|Gsn|Oasl1|Oas3|Oas1a|Isg15	-4.633982442
BP	GO:0045071	negative regulation of viral genome replication	19_GO:0051704 multi-organism process	-6.848335227	7.035919605	16	Ltf|Prox1|Slpi|Plscr1|Oas1g|Oasl2|Isg20|Rsad2|Ifitm3|Ifitm1|Ifitm2|Tasor|Oasl1|Oas3|Oas1a|Isg15	-4.460241837
BP	GO:0043900	regulation of multi-organism process	19_GO:0051704 multi-organism process	-5.981566028	5.418068673	51	Arg1|Arg2|Anxa2|Cxcr4|Csf1r|Fcnb|Fgl2|Gja1|Cxcl1|Ifng|Il1b|Il2ra|Acod1|Mdfic|Lgals1|Ltf|Mif|Nos2|P2ry2|Prkca|Prox1|Slpi|Aurka|Timp1|Plscr1|Trim26|Oas1g|Oasl2|Tlr2|Prdx4|Hpgds|Htra1|Isg20|Rsad2|Ppih|Ifitm3|Smurf2|Trim59|Ifitm1|Fbxl2|Ifitm2|Il23a|Rnf216|Tasor|Gsn|Oasl1|Oas3|Oas1a|Scimp|Trim5|Isg15	-3.72785293
BP	GO:0048525	negative regulation of viral process	19_GO:0051704 multi-organism process	-5.766648484	5.907193205	20	Fcnb|Ltf|Prox1|Slpi|Plscr1|Trim26|Oas1g|Oasl2|Isg20|Rsad2|Ifitm3|Trim59|Ifitm1|Ifitm2|Tasor|Gsn|Oasl1|Oas3|Oas1a|Isg15	-3.568732814
BP	GO:0043903	regulation of symbiosis, encompassing mutualism through parasitism	19_GO:0051704 multi-organism process	-5.252134003	5.203768836	31	Arg1|Anxa2|Cxcr4|Csf1r|Fcnb|Cxcl1|Ifng|Mdfic|Lgals1|Ltf|Prox1|Slpi|Plscr1|Trim26|Oas1g|Oasl2|Isg20|Rsad2|Ppih|Ifitm3|Trim59|Ifitm1|Fbxl2|Ifitm2|Tasor|Gsn|Oasl1|Oas3|Oas1a|Trim5|Isg15	-3.165070608
BP	GO:0045069	regulation of viral genome replication	19_GO:0051704 multi-organism process	-4.904253873	5.318821394	18	Ltf|Prox1|Slpi|Plscr1|Oas1g|Oasl2|Isg20|Rsad2|Ppih|Ifitm3|Ifitm1|Fbxl2|Ifitm2|Tasor|Oasl1|Oas3|Oas1a|Isg15	-2.907367108
BP	GO:0050792	regulation of viral process	19_GO:0051704 multi-organism process	-4.712863517	4.874435959	28	Cxcr4|Csf1r|Fcnb|Ifng|Mdfic|Lgals1|Ltf|Prox1|Slpi|Plscr1|Trim26|Oas1g|Oasl2|Isg20|Rsad2|Ppih|Ifitm3|Trim59|Ifitm1|Fbxl2|Ifitm2|Tasor|Gsn|Oasl1|Oas3|Oas1a|Trim5|Isg15	-2.764624459
BP	GO:1903900	regulation of viral life cycle	19_GO:0051704 multi-organism process	-4.70593749	4.95716283	24	Fcnb|Lgals1|Ltf|Prox1|Slpi|Plscr1|Trim26|Oas1g|Oasl2|Isg20|Rsad2|Ppih|Ifitm3|Trim59|Ifitm1|Fbxl2|Ifitm2|Tasor|Gsn|Oasl1|Oas3|Oas1a|Trim5|Isg15	-2.760203248
BP	GO:0044403	symbiont process	19_GO:0051704 multi-organism process	-4.654271551	4.640044539	43	Arg1|Bax|Anxa2|Cxcr4|Csf1r|Ddx6|Fcnb|Fn1|Gbp2|Cxcl1|Ifng|Mdfic|Lgals1|Ltf|Prox1|Rock2|Slpi|Scarb1|Pglyrp1|Plscr1|Trim26|Oas1g|Oasl2|Ulk2|Isg20|Rsad2|Zbp1|Trem1|Ppih|Ifitm3|Trim59|Ifitm1|Ist1|Fbxl2|Mvb12a|Ifitm2|Tasor|Gsn|Oasl1|Oas3|Oas1a|Trim5|Isg15	-2.715376733
BP	GO:0044419	interspecies interaction between organisms	19_GO:0051704 multi-organism process	-4.464076687	4.465153896	49	Arg1|Bax|Anxa2|Cxcr4|Csf1r|Ddx6|Fcnb|Fn1|Gbp2|Cxcl1|Cxcl10|Ifng|Mdfic|Lgals1|Lgals3|Ltf|Nos2|Prox1|Rock2|S100a9|Cxcl2|Slpi|Scarb1|Pglyrp1|Plscr1|Trim26|Oas1g|Oasl2|Ulk2|Cxcl14|Isg20|Rsad2|Zbp1|Trem1|Ppih|Ifitm3|Trim59|Ifitm1|Ist1|Fbxl2|Mvb12a|Ifitm2|Tasor|Gsn|Oasl1|Oas3|Oas1a|Trim5|Isg15	-2.5609867
BP	GO:0019079	viral genome replication	19_GO:0051704 multi-organism process	-4.399583463	4.863734854	19	Ltf|Prox1|Rock2|Slpi|Plscr1|Oas1g|Oasl2|Isg20|Rsad2|Ppih|Ifitm3|Ifitm1|Fbxl2|Ifitm2|Tasor|Oasl1|Oas3|Oas1a|Isg15	-2.516341669
BP	GO:0019058	viral life cycle	19_GO:0051704 multi-organism process	-3.969199662	4.312821941	28	Ddx6|Fcnb|Lgals1|Ltf|Prox1|Rock2|Slpi|Plscr1|Trim26|Oas1g|Oasl2|Isg20|Rsad2|Ppih|Ifitm3|Trim59|Ifitm1|Ist1|Fbxl2|Mvb12a|Ifitm2|Tasor|Gsn|Oasl1|Oas3|Oas1a|Trim5|Isg15	-2.192483488
BP	GO:0098542	defense response to other organism	19_GO:0051704 multi-organism process	-3.654207125	3.82682425	66	Acp5|Ang|Arg1|Arg2|Epha2|Wfdc18|Fgl2|Fgr|Gbp2|Cxcl1|Cxcl10|Ifit1|Ifit2|Ifit3|Ifng|Il1b|Il2ra|Acod1|Itgax|Lcn2|Ltf|Ncr1|Lyz1|Clec4d|Naip6|Nos2|Pld1|Slpi|Cd40|Pglyrp1|Plscr1|Oas1g|Oasl2|Tlr2|Klrk1|Tslp|Irf7|Htra1|Clec4e|Clec4n|Isg20|Rsad2|Zbp1|Trem1|Ifitm3|Ddx17|Rtp4|Ifitm1|Tagap|Mlkl|Il33|Ifitm2|Il23a|Rnf216|Npy|Tlr3|Plac8|Oasl1|Setd2|Peli3|Oas3|Oas1a|Ifit3b|Ifit1bl1|Wfdc17|Isg15	-1.964420232
BP	GO:0016032	viral process	19_GO:0051704 multi-organism process	-3.473672501	3.856221413	34	Bax|Cxcr4|Csf1r|Ddx6|Fcnb|Ifng|Mdfic|Lgals1|Ltf|Prox1|Rock2|Slpi|Plscr1|Trim26|Oas1g|Oasl2|Isg20|Rsad2|Zbp1|Ppih|Ifitm3|Trim59|Ifitm1|Ist1|Fbxl2|Mvb12a|Ifitm2|Tasor|Gsn|Oasl1|Oas3|Oas1a|Trim5|Isg15	-1.820264667
BP	GO:1902850	microtubule cytoskeleton organization involved in mitosis	19_GO:0071840 cellular component organization or biogenesis	-7.19651164	6.63073336	27	Birc5|Cenpa|Eya1|Gja1|Nek2|Plk1|Aurkb|Aurka|Tacc3|Spry1|Racgap1|Mad2l1|Spc25|Nuf2|Ndc80|Spdl1|Sapcd2|Tpx2|Gpsm2|Clasp2|Cdc20|Nusap1|Tasor|Prc1|Setd2|Ofd1|Ccnb1	-4.741471459
CC	GO:0072686	mitotic spindle		-5.424620026	5.527622881	23	Aspm|Capg|Cdk1|Cdc7|Ect2|Plk1|Aurkb|Aurka|Tacc3|Racgap1|Knstrn|Spag5|Mad2l1|Ska1|Tpx2|Tppp|Atat1|Gpsm2|Clasp2|Nusap1|Kif22|Ttc28|Prc1	-3.292329091
CC	GO:0005819	spindle		-5.260243021	5.101243317	38	Birc5|Bub1b|Aspm|Capg|Cdc25b|Cdk1|Cdc7|Ect2|Hspa2|Nek2|Plk1|Kif20a|Rock2|Plk4|Aurkb|Aurka|Tacc3|Ttk|Racgap1|Knstrn|Cdca8|Spag5|Mad2l1|Tctex1d2|Ska1|Spdl1|Tpx2|Sgo1|Tppp|Atat1|Kif2c|Gpsm2|Clasp2|Nusap1|Kif22|Ttc28|Prc1|Ccnb1	-3.16672323
BP	GO:0007051	spindle organization	19_GO:0071840 cellular component organization or biogenesis	-3.828821699	4.268453872	24	Birc5|Aspm|Nek2|Plk1|Aurkb|Aurka|Tacc3|Racgap1|Knstrn|Spag5|Cenpw|Spc25|Nuf2|Ndc80|Tpx2|Tppp|Gpsm2|Haus8|Clasp2|Cdc20|Tasor|Prc1|Ofd1|Ccnb1	-2.094470773
BP	GO:0007052	mitotic spindle organization	19_GO:0071840 cellular component organization or biogenesis	-3.790408956	4.38180032	18	Birc5|Nek2|Plk1|Aurkb|Aurka|Tacc3|Racgap1|Spc25|Nuf2|Ndc80|Tpx2|Gpsm2|Clasp2|Cdc20|Tasor|Prc1|Ofd1|Ccnb1	-2.061797035
BP	GO:0051225	spindle assembly	19_GO:0071840 cellular component organization or biogenesis	-3.494795322	4.151615225	17	Birc5|Aspm|Nek2|Plk1|Aurkb|Aurka|Racgap1|Spag5|Cenpw|Tpx2|Gpsm2|Haus8|Clasp2|Cdc20|Tasor|Prc1|Ofd1	-1.836305171
BP	GO:0090307	mitotic spindle assembly	19_GO:0071840 cellular component organization or biogenesis	-2.712801202	3.614525353	11	Birc5|Nek2|Plk1|Aurkb|Racgap1|Tpx2|Clasp2|Cdc20|Tasor|Prc1|Ofd1	-1.247051076
CC	GO:0000922	spindle pole		-2.614239517	3.325493079	17	Aspm|Cdc25b|Nek2|Plk1|Rock2|Plk4|Aurkb|Aurka|Spag5|Mad2l1|Tctex1d2|Spdl1|Tpx2|Sgo1|Gpsm2|Ttc28|Ccnb1	-1.169107625
CC	GO:0005876	spindle microtubule		-2.557738795	3.494981921	10	Birc5|Cdk1|Plk1|Aurkb|Aurka|Spag5|Ska1|Tpx2|Clasp2|Nusap1	-1.132290487
CC	GO:0097431	mitotic spindle pole		-2.424302753	3.553352117	7	Aspm|Plk1|Aurkb|Aurka|Spag5|Gpsm2|Ttc28	-1.040483481
BP	GO:0002573	myeloid leukocyte differentiation	19_GO:0002376 immune system process	-7.086634294	6.325048032	35	Adam8|Anxa2|Ccr1|Ccr7|Csf1r|Csf3|Epha2|Ifng|Il3ra|Kit|Mafb|Mef2c|Cited2|Nme1|Nme2|Pik3r1|Pirb|Prkca|Psen2|Tgfbr2|Tnfsf9|Tlr2|Tob2|Ubash3b|Ocstamp|Dcstamp|Fam20c|Il23a|Clec2d|Slc9b2|Pilrb1|Gpr55|Inpp4b|Cd300lf|Spib	-4.658577603
BP	GO:0030099	myeloid cell differentiation	19_GO:0002376 immune system process	-5.541319572	5.165505757	49	Adam8|Anxa2|Cdkn1c|Ccr1|Ccr7|Csf1r|Csf3|Dmtn|Epha2|Fas|Hmgb3|Ifng|Il3ra|Eif6|Kit|Mafb|Mef2c|Cited2|Nme1|Nme2|Pik3r1|Pirb|Prkca|Psen2|Scin|Tgfbr2|Tnfsf9|Plscr1|Ets1|Tlr2|Mfhas1|Tob2|Ubash3b|Ocstamp|Dcstamp|Fam20c|Il23a|Clec2d|Slc9b2|Hba-a2|Pilrb1|Gpr55|Gpr171|Pabpc4|Ankle1|Inpp4b|Cd300lf|Spib|Isg15	-3.390084442
BP	GO:0030316	osteoclast differentiation	19_GO:0002376 immune system process	-5.176584641	5.449790229	20	Adam8|Anxa2|Ccr1|Csf1r|Epha2|Ifng|Mafb|Pik3r1|Tob2|Ubash3b|Ocstamp|Dcstamp|Fam20c|Il23a|Clec2d|Slc9b2|Pilrb1|Gpr55|Inpp4b|Cd300lf	-3.117251588
BP	GO:1902106	negative regulation of leukocyte differentiation	19_GO:0002376 immune system process	-5.03945935	5.383415153	19	Cd44|Fgl2|Flt3|Hmgb3|Ifng|Mafb|Lag3|Smad7|Nme1|Nme2|Pik3r1|Pglyrp1|Tob2|Zc3h8|Ubash3b|Clec2d|Pilrb1|Gpr55|Inpp4b	-3.018380084
BP	GO:0045670	regulation of osteoclast differentiation	19_GO:0002376 immune system process	-4.515215858	5.143684168	15	Adam8|Ccr1|Csf1r|Ifng|Mafb|Pik3r1|Tob2|Ubash3b|Ocstamp|Il23a|Clec2d|Slc9b2|Pilrb1|Gpr55|Inpp4b	-2.601986682
BP	GO:0045671	negative regulation of osteoclast differentiation	19_GO:0002376 immune system process	-4.421258221	5.619094318	9	Ifng|Mafb|Pik3r1|Tob2|Ubash3b|Clec2d|Pilrb1|Gpr55|Inpp4b	-2.533515926
BP	GO:0002762	negative regulation of myeloid leukocyte differentiation	19_GO:0002376 immune system process	-3.905672534	4.850448014	11	Ifng|Mafb|Nme1|Nme2|Pik3r1|Tob2|Ubash3b|Clec2d|Pilrb1|Gpr55|Inpp4b	-2.144218179
BP	GO:1903707	negative regulation of hemopoiesis	19_GO:0002376 immune system process	-3.875235822	4.34740389	22	Cd44|Fgl2|Flt3|Hes1|Hmgb3|Ifng|Mafb|Lag3|Smad7|Nme1|Nme2|Pik3r1|Pglyrp1|Tob2|Zc3h8|Ubash3b|Clec2d|Pilrb1|Gpr55|Gpr171|Inpp4b|N4bp2l2	-2.124753218
BP	GO:0045637	regulation of myeloid cell differentiation	19_GO:0002376 immune system process	-3.867919462	4.233781079	28	Adam8|Ccr1|Csf1r|Csf3|Fas|Hmgb3|Ifng|Eif6|Mafb|Mef2c|Nme1|Nme2|Pik3r1|Prkca|Scin|Ets1|Tob2|Ubash3b|Ocstamp|Dcstamp|Il23a|Clec2d|Slc9b2|Pilrb1|Gpr55|Gpr171|Inpp4b|Isg15	-2.120667751
BP	GO:0002761	regulation of myeloid leukocyte differentiation	19_GO:0002376 immune system process	-3.623941	4.208281125	19	Adam8|Ccr1|Csf1r|Ifng|Mafb|Nme1|Nme2|Pik3r1|Prkca|Tob2|Ubash3b|Ocstamp|Dcstamp|Il23a|Clec2d|Slc9b2|Pilrb1|Gpr55|Inpp4b	-1.942699346
BP	GO:0045638	negative regulation of myeloid cell differentiation	19_GO:0002376 immune system process	-2.394485125	3.197796814	13	Hmgb3|Ifng|Mafb|Nme1|Nme2|Pik3r1|Tob2|Ubash3b|Clec2d|Pilrb1|Gpr55|Gpr171|Inpp4b	-1.020696423
BP	GO:0051653	spindle localization	19_GO:0051179 localization	-6.990371686	7.257755973	15	Aspm|Cenpa|Eya1|Gja1|Plk1|Spry1|Spag5|Mad2l1|Ndc80|Spire1|Spdl1|Sapcd2|Gpsm2|Clasp2|Nusap1	-4.577735354
BP	GO:0051293	establishment of spindle localization	19_GO:0051179 localization	-6.785131237	7.201624697	14	Cenpa|Eya1|Gja1|Plk1|Spry1|Spag5|Mad2l1|Ndc80|Spire1|Spdl1|Sapcd2|Gpsm2|Clasp2|Nusap1	-4.411124307
BP	GO:0040001	establishment of mitotic spindle localization	19_GO:0051179 localization	-6.417860948	7.148641701	12	Cenpa|Eya1|Gja1|Plk1|Spry1|Mad2l1|Ndc80|Spdl1|Sapcd2|Gpsm2|Clasp2|Nusap1	-4.09603203
BP	GO:0051294	establishment of spindle orientation	19_GO:0051179 localization	-5.240026726	6.171441068	11	Cenpa|Eya1|Gja1|Plk1|Spry1|Spag5|Mad2l1|Ndc80|Spdl1|Sapcd2|Gpsm2	-3.162176474
BP	GO:0000132	establishment of mitotic spindle orientation	19_GO:0051179 localization	-5.168702617	6.246894394	10	Cenpa|Eya1|Gja1|Plk1|Spry1|Mad2l1|Ndc80|Spdl1|Sapcd2|Gpsm2	-3.111602446
BP	GO:0030010	establishment of cell polarity	19_GO:0009987 cellular process	-4.496025395	4.847346303	22	Cenpa|Ccr7|Eya1|Fscn1|Gja1|Hes1|Hsp90aa1|Map1b|Fam89b|Plk1|Nek3|Spry1|Spag5|Mad2l1|Ndc80|Spdl1|Sapcd2|Gpsm2|Ophn1|Gsn|Frmd4b|Brsk1	-2.588223306
BP	GO:0007163	establishment or maintenance of cell polarity	19_GO:0009987 cellular process	-3.901403361	4.259989107	28	Macf1|Rhob|Cenpa|Ccr7|Eya1|Fscn1|Gja1|Hes1|Hsp90aa1|Map1b|Fam89b|Plk1|Nek3|Spry1|Spag5|Mad2l1|Ndc80|Rhobtb1|Spdl1|Sapcd2|Kif2c|Rnd3|Gpsm2|Clasp2|Ophn1|Gsn|Frmd4b|Brsk1	-2.144218179
BP	GO:0051656	establishment of organelle localization	19_GO:0051179 localization	-3.118006225	3.490192321	48	Adora2a|Adora2b|Adra2a|Birc5|Cenpa|Ctbp2|Eya1|Fgr|Gja1|Eif6|Kit|Map1b|Myo1b|P2ry2|Pcm1|Prkca|Plk1|Ran|Aurkb|Stx3|Tacc3|Vamp1|Spry1|Cdca8|Spag5|Mad2l1|Chp1|Nuf2|Ndc80|Cdt1|Mgarp|Cdca5|Spire1|Spdl1|Sapcd2|Kif2c|Stx11|Bicdl1|Gpsm2|Clasp2|Bicd2|Tanc2|Nusap1|Kif22|Nr3c2|Ccnb1|Hook3|Mreg	-1.541723454
BP	GO:0051640	organelle localization	19_GO:0051179 localization	-3.004040741	3.367847384	57	Adora2a|Adora2b|Adra2a|Birc5|Aspm|Cenpa|Cfh|Ctbp2|Eya1|Fgr|Gja1|Eif6|Kit|Rab8a|Map1b|Myo1b|P2ry2|Pcm1|Prkca|Plk1|Psen2|Ran|Aurkb|Aurka|Stx3|Tacc3|Vamp1|Spry1|Nubp1|Bin1|Cdca8|Spag5|Mad2l1|Chp1|Nuf2|Ndc80|Cdt1|Mgarp|Cdca5|Spire1|Spdl1|Sapcd2|Kif2c|Stx11|Bicdl1|Exoc6b|Gpsm2|Clasp2|Bicd2|Tanc2|Nusap1|Kif22|Nr3c2|Mlph|Ccnb1|Hook3|Mreg	-1.449997558
BP	GO:0031348	negative regulation of defense response	19_GO:0048519 negative regulation of biological process	-6.745966252	6.111741299	35	Acp5|Adora2a|Apod|Arg1|Arg2|Cd24a|Cd44|Ccr1|Cst7|Ctla2a|Fgl2|Igf2|Il1r2|Il2ra|Acod1|Smad3|Cd200|Nfkb1|Psmb4|Tap1|Pglyrp1|Nr1h3|Ets1|Sh2d1b1|Pbk|Mfhas1|Mefv|Calcrl|Htra1|Klrb1b|Clec2d|Ffar4|Metrnl|Klre1|Gpr31b	-4.376555075
BP	GO:0032102	negative regulation of response to external stimulus	19_GO:0048519 negative regulation of biological process	-6.169683563	5.59513896	45	Acp5|Adora2a|Angpt2|Anxa5|Apod|Arg2|Fabp7|Cacnb3|Anxa2|Cd24a|Cd44|Cdkn1a|Cst7|Ctla2a|Fgl2|Gja1|Il1r2|Il2ra|Acod1|Ltf|Smad3|Mif|Cd200|Nfkb1|Pdgfb|Padi2|Psmb4|Thbs1|Pglyrp1|Nr1h3|Ets1|Pbk|Mfhas1|Mefv|Calcrl|Htra1|Ubash3b|Clasp2|Ffar4|Gpr18|Metrnl|Sema6d|Ajap1|Rtn4rl1|Gpr31b	-3.872615738
BP	GO:0050728	negative regulation of inflammatory response	19_GO:0048519 negative regulation of biological process	-4.847192754	5.064500852	24	Acp5|Adora2a|Apod|Cd24a|Cd44|Cst7|Ctla2a|Il1r2|Il2ra|Acod1|Smad3|Cd200|Nfkb1|Psmb4|Pglyrp1|Nr1h3|Ets1|Pbk|Mfhas1|Mefv|Calcrl|Ffar4|Metrnl|Gpr31b	-2.856083829
CC	GO:0098552	side of membrane		-6.682259778	5.610133355	83	Anxa5|Aqp4|Cd2|Cd24a|Cd44|Cd69|Cxcr4|Ccr1|Ccr2|Ccr7|Ctsk|Eng|Fas|Fcnb|Fgr|Flt3|Gfap|Glrb|Gna15|Gnb4|Pdpn|Lilrb4a|Gsr|H2-Aa|H2-Ab1|H2-T10|H2-T22|Cxcl10|Ifng|Il2ra|Il2rb|Il2rg|Il3ra|Itga5|Itgax|Jup|Kit|Klrd1|Lag3|Anpep|Lck|Lgals3|Ly6c1|Cd244a|Rgs2|Ryr1|S100a6|Msr1|Sell|Sdc1|Tgfbr2|Thbs1|Tnfrsf18|Cd40|Cd27|Tnfrsf9|Traf1|Traf5|Vwf|Yes1|Tlr2|Racgap1|Klrk1|Raet1d|Pdcd1lg2|Cd274|Gng13|Gng11|Tnfsf13|P2ry…	-4.321896729
CC	GO:0009897	external side of plasma membrane		-6.054730738	5.350431985	66	Anxa5|Aqp4|Cd2|Cd24a|Cd44|Cd69|Cxcr4|Ccr1|Ccr2|Ccr7|Ctsk|Eng|Fas|Fcnb|Flt3|Glrb|Pdpn|Lilrb4a|Gsr|H2-Aa|H2-Ab1|H2-T10|H2-T22|Cxcl10|Ifng|Il2ra|Il2rb|Il2rg|Il3ra|Itga5|Itgax|Kit|Klrd1|Lag3|Anpep|Lgals3|Ly6c1|Cd244a|Msr1|Sell|Sdc1|Tgfbr2|Thbs1|Tnfrsf18|Cd40|Cd27|Tnfrsf9|Vwf|Tlr2|Klrk1|Raet1d|Pdcd1lg2|Cd274|Tnfsf13|P2ry12|Vsir|Klrb1b|Clec2d|Ly6a|Cd209e|Rtn4rl1|Cd200r4|Klre1|Fcgr4|Ly6g|Gm11127	-3.781178673
MF	GO:0017116	single-stranded DNA-dependent ATP-dependent DNA helicase activity		-6.355521022	7.689935952	9	Mcm2|Mcm5|Mcm6|Rad51|Rfc5|Polq|Rfc4|Chtf18|Dna2	-4.041809994
MF	GO:0043142	single-stranded DNA-dependent ATPase activity		-6.355521022	7.689935952	9	Mcm2|Mcm5|Mcm6|Rad51|Rfc5|Polq|Rfc4|Chtf18|Dna2	-4.041809994
MF	GO:0004003	ATP-dependent DNA helicase activity		-5.899466905	7.205796314	9	Mcm2|Mcm5|Mcm6|Rad51|Rfc5|Polq|Rfc4|Chtf18|Dna2	-3.662921833
MF	GO:0008026	ATP-dependent helicase activity		-5.899466905	7.205796314	9	Mcm2|Mcm5|Mcm6|Rad51|Rfc5|Polq|Rfc4|Chtf18|Dna2	-3.662921833
MF	GO:0070035	purine NTP-dependent helicase activity		-5.899466905	7.205796314	9	Mcm2|Mcm5|Mcm6|Rad51|Rfc5|Polq|Rfc4|Chtf18|Dna2	-3.662921833
BP	GO:0006260	DNA replication	19_GO:0008152 metabolic process	-5.121805506	5.078883933	33	Adra2a|Ccna2|Ccne1|Cdk1|Cdc7|Cst3|Id3|Mcm2|Mcm4|Mcm5|Mcm6|Nfix|Orc1|Pdgfb|Pole|Rad51|Rrm2|Timeless|Wrn|Gmnn|Cdt1|Pclaf|Etaa1|Gins1|Rfc5|Mgme1|Polq|Rfc4|Chaf1b|Chtf18|Zbtb38|Eme1|Dna2	-3.075700719
BP	GO:0006261	DNA-dependent DNA replication	19_GO:0008152 metabolic process	-4.441742039	4.832979184	21	Ccne1|Cdc7|Mcm2|Mcm4|Mcm5|Mcm6|Orc1|Pole|Rad51|Timeless|Wrn|Cdt1|Etaa1|Gins1|Rfc5|Mgme1|Polq|Rfc4|Chtf18|Eme1|Dna2	-2.546393692
BP	GO:0033260	nuclear DNA replication	19_GO:0008152 metabolic process	-3.741757004	4.880076888	9	Cdc7|Mcm2|Mcm4|Mcm5|Mcm6|Rad51|Cdt1|Gins1|Dna2	-2.025050096
BP	GO:0000727	double-strand break repair via break-induced replication	19_GO:0050896 response to stimulus	-3.408905212	5.270542913	5	Cdc7|Mcm2|Mcm4|Mcm5|Mcm6	-1.769340605
MF	GO:0003678	DNA helicase activity		-3.37595009	4.311556762	11	Mcm2|Mcm4|Mcm5|Mcm6|Rad51|Wrn|Rfc5|Polq|Rfc4|Chtf18|Dna2	-1.744818651
MF	GO:0004386	helicase activity		-3.291616409	3.893682414	20	Ddx4|Ddx6|Hells|Mcm2|Mcm4|Mcm5|Mcm6|Rad51|Hltf|Wrn|Ddx3y|Ddx17|Ddx39a|Rfc5|Polq|Helz|Rfc4|Dhx57|Chtf18|Dna2	-1.675263901
BP	GO:0044786	cell cycle DNA replication	19_GO:0008152 metabolic process	-3.286232716	4.378014804	9	Cdc7|Mcm2|Mcm4|Mcm5|Mcm6|Rad51|Cdt1|Gins1|Dna2	-1.670686699
BP	GO:0006267	pre-replicative complex assembly involved in nuclear cell cycle DNA replication	19_GO:0071840 cellular component organization or biogenesis	-3.162338901	5.304980876	4	Mcm2|Mcm4|Mcm5|Mcm6	-1.577131956
BP	GO:0036388	pre-replicative complex assembly	19_GO:0071840 cellular component organization or biogenesis	-3.162338901	5.304980876	4	Mcm2|Mcm4|Mcm5|Mcm6	-1.577131956
BP	GO:1902299	pre-replicative complex assembly involved in cell cycle DNA replication	19_GO:0071840 cellular component organization or biogenesis	-3.162338901	5.304980876	4	Mcm2|Mcm4|Mcm5|Mcm6	-1.577131956
BP	GO:0006268	DNA unwinding involved in DNA replication	19_GO:0071840 cellular component organization or biogenesis	-2.894491369	4.520770982	5	Mcm2|Mcm4|Mcm6|Rad51|Wrn	-1.367558046
BP	GO:1902969	mitotic DNA replication	19_GO:0008152 metabolic process	-2.894491369	4.520770982	5	Mcm2|Mcm4|Mcm6|Rad51|Gins1	-1.367558046
MF	GO:0140097	catalytic activity, acting on DNA		-2.88057022	3.490769894	22	Dnase1l3|Dnmt3a|Hmga2|Mcm2|Mcm4|Mcm5|Mcm6|Nme1|Pole|Rad51|Tep1|Ung|Wrn|Ercc5|Isg20|Dnase1l1|Rfc5|Mgme1|Polq|Rfc4|Chtf18|Dna2	-1.355603516
BP	GO:0006270	DNA replication initiation	19_GO:0008152 metabolic process	-2.658106721	3.848578472	7	Ccne1|Mcm2|Mcm4|Mcm5|Mcm6|Orc1|Cdt1	-1.202804195
MF	GO:0008094	DNA-dependent ATPase activity		-2.452295863	3.37614526	10	Mcm2|Mcm5|Mcm6|Rad51|Hltf|Rfc5|Polq|Rfc4|Chtf18|Dna2	-1.05865097
CC	GO:0042555	MCM complex		-2.39531027	4.043205276	4	Mcm2|Mcm4|Mcm5|Mcm6	-1.020696423
MF	GO:0003688	DNA replication origin binding		-2.100596823	3.360296199	5	Mcm2|Mcm4|Mcm5|Mcm6|Orc1	-0.82054568
BP	GO:0000226	microtubule cytoskeleton organization	19_GO:0071840 cellular component organization or biogenesis	-6.182544102	5.423869642	66	Abl1|Birc5|Calm3|Aspm|Ccnf|Cdk5r1|Cenpa|Eya1|Srgap2|Gda|Gja1|Map1b|Nek2|Neurl1a|Pcm1|Plk1|Kif20a|Rock2|Plk4|Aurkb|Aurka|Tacc3|Spry1|Nubp1|Racgap1|Knstrn|Spag5|Mad2l1|Chp1|Fignl1|Cenpw|Spc25|Ska1|Nuf2|Ndc80|Tppp3|Pclaf|Mid1ip1|Spire1|Dnajb13|Spdl1|Sapcd2|Tpx2|Sgo1|Tppp|Kif2c|Gpsm2|Haus8|Clasp2|Bicd2|Cul9|Ckap2|Cep152|Cdc20|Nusap1|Cep68|Tasor|Prc1|Setd2|Ofd1|Gas2l3|Nav3|Ccnb1|Kif19a|Hook3|Brsk1	-3.876802004
BP	GO:0031023	microtubule organizing center organization	19_GO:0071840 cellular component organization or biogenesis	-2.296593069	3.023976405	16	Ccnf|Nek2|Pcm1|Plk1|Rock2|Plk4|Aurka|Nubp1|Pclaf|Sgo1|Haus8|Clasp2|Cep152|Cep68|Ofd1|Brsk1	-0.952487757
BP	GO:0007098	centrosome cycle	19_GO:0071840 cellular component organization or biogenesis	-2.241129257	2.98539543	15	Ccnf|Nek2|Pcm1|Plk1|Rock2|Plk4|Aurka|Nubp1|Pclaf|Sgo1|Haus8|Cep152|Cep68|Ofd1|Brsk1	-0.914396578
BP	GO:0070507	regulation of microtubule cytoskeleton organization	19_GO:0071840 cellular component organization or biogenesis	-2.114302036	2.765509479	21	Abl1|Ccnf|Cdk5r1|Gda|Map1b|Nek2|Plk1|Rock2|Plk4|Tacc3|Nubp1|Spag5|Ska1|Mid1ip1|Tpx2|Tppp|Gpsm2|Clasp2|Bicd2|Ckap2|Nav3	-0.829373062
BP	GO:0001776	leukocyte homeostasis	19_GO:0002376 immune system process	-6.086830058	6.056124887	22	Abl1|Bax|Ccnb2|Cd24a|Cd44|Cfh|Ccr2|Fas|Flt3|Lilrb4a|Ifng|Il2ra|Mef2c|Mertk|Mif|Pirb|Sos1|Slc7a11|Siva1|Zc3h8|Hcar2|Dock10	-3.803306233
BP	GO:0048872	homeostasis of number of cells	19_GO:0065007 biological regulation	-4.542964821	4.600796676	39	Abl1|Bax|Ccnb2|Cd24a|Cd44|Cd7|Cfh|Ccr2|Ccr7|Dmtn|Fas|Flt3|Lilrb4a|Ifng|Il2ra|Kit|Mafb|Mef2c|Mertk|Mif|Cited2|Prdx1|Pirb|Sos1|Ets1|Slc7a11|Siva1|Mfhas1|Prdx5|Mtch2|Zc3h8|Klhl10|Hcar2|Tex15|Hba-a2|Dock10|Ankle1|Smo|Isg15	-2.6223413
BP	GO:0002260	lymphocyte homeostasis	19_GO:0002376 immune system process	-3.726485607	4.481785624	14	Abl1|Bax|Ccnb2|Cd24a|Cd44|Fas|Il2ra|Mef2c|Mif|Pirb|Sos1|Siva1|Zc3h8|Dock10	-2.013964219
BP	GO:0001782	B cell homeostasis	19_GO:0002376 immune system process	-2.932370508	4.073276979	8	Abl1|Bax|Cd44|Mef2c|Mif|Pirb|Sos1|Dock10	-1.393446698
BP	GO:0002262	myeloid cell homeostasis	19_GO:0002376 immune system process	-2.122908542	2.785281972	20	Bax|Cd24a|Cd44|Cfh|Ccr2|Dmtn|Lilrb4a|Ifng|Kit|Mafb|Mertk|Cited2|Prdx1|Ets1|Slc7a11|Mfhas1|Hcar2|Hba-a2|Ankle1|Isg15	-0.834579246
BP	GO:0009117	nucleotide metabolic process	19_GO:0008152 metabolic process	-6.052766494	5.367968475	63	Adora2b|Adssl1|Aprt|Tspo|Entpd1|Cdk1|Cfh|Coq7|Cox4i1|Cox6a2|Dck|Eno1|Epha2|Fxn|Gucy2c|Hint1|Hmgcs2|Ifng|Eif6|Ldha|Ldhc|Mif|Mdh2|ND2|Nme1|Nme2|Nos2|Pgk1|Pkm|Ran|Rrm2|Dtymk|Tpi1|Cmpk2|Tyms|Upp1|Uqcrq|Oasl2|Papss2|Acot1|Atp5o|Nt5c|Prdx5|Pfkp|Mtch2|Ppcdc|Ndufb8|Pmvk|Nmrk2|Acot7|Gale|Fam20c|Uck2|Kmo|Dut|Pde2a|Slc2a6|Gimap7|Oas1a|Ccnb1|Tigar|Dnph1|Eno1b	-3.781178673
BP	GO:0006753	nucleoside phosphate metabolic process	19_GO:0008152 metabolic process	-5.845907032	5.246977942	63	Adora2b|Adssl1|Aprt|Tspo|Entpd1|Cdk1|Cfh|Coq7|Cox4i1|Cox6a2|Dck|Eno1|Epha2|Fxn|Gucy2c|Hint1|Hmgcs2|Ifng|Eif6|Ldha|Ldhc|Mif|Mdh2|ND2|Nme1|Nme2|Nos2|Pgk1|Pkm|Ran|Rrm2|Dtymk|Tpi1|Cmpk2|Tyms|Upp1|Uqcrq|Oasl2|Papss2|Acot1|Atp5o|Nt5c|Prdx5|Pfkp|Mtch2|Ppcdc|Ndufb8|Pmvk|Nmrk2|Acot7|Gale|Fam20c|Uck2|Kmo|Dut|Pde2a|Slc2a6|Gimap7|Oas1a|Ccnb1|Tigar|Dnph1|Eno1b	-3.625877048
BP	GO:0016053	organic acid biosynthetic process	19_GO:0008152 metabolic process	-5.769601135	5.326627712	47	Apoc2|Ass1|Cyp7b1|Dhfr|Eno1|Gch1|Glul|Got1|Ifng|Il1b|Eif6|Fabp5|Ldha|Ldhc|Lpl|Mif|Nfkb1|Pdgfb|Pgk1|Pkm|Prkab1|Prox1|Qk|Slc1a3|Sphk1|Tpi1|Nr1h3|Mgll|Asah2|Hpgds|Pfkp|Mtch2|Akr1a1|Ptges|Mid1ip1|Acot7|Gale|Acsbg1|Kmo|Psat1|Slc2a6|Trib3|Liph|Csad|Tigar|Atp2b4|Eno1b	-3.568732814
BP	GO:0046394	carboxylic acid biosynthetic process	19_GO:0008152 metabolic process	-5.436931114	5.127347431	46	Apoc2|Ass1|Cyp7b1|Dhfr|Eno1|Gch1|Glul|Got1|Ifng|Il1b|Eif6|Fabp5|Ldha|Ldhc|Lpl|Mif|Nfkb1|Pdgfb|Pgk1|Pkm|Prkab1|Prox1|Qk|Slc1a3|Sphk1|Tpi1|Nr1h3|Mgll|Asah2|Hpgds|Pfkp|Mtch2|Akr1a1|Ptges|Mid1ip1|Acot7|Gale|Acsbg1|Kmo|Psat1|Slc2a6|Trib3|Liph|Tigar|Atp2b4|Eno1b	-3.299311345
BP	GO:0055086	nucleobase-containing small molecule metabolic process	19_GO:0008152 metabolic process	-5.350214927	4.92925175	67	Adora2b|Adssl1|Aprt|Tspo|Entpd1|Cdk1|Cfh|Coq7|Cox4i1|Cox6a2|Dck|Eno1|Epha2|Fxn|Gda|Gucy2c|Hint1|Hmgcs2|Ifng|Eif6|Ldha|Ldhc|Mif|Mdh2|ND2|Nme1|Nme2|Nos2|Pgk1|Pkm|Ran|Rrm2|Tk1|Dtymk|Tpi1|Cmpk2|Tyms|Upp1|Uqcrq|Oasl2|Papss2|Acot1|Atp5o|Nt5c|Prdx5|Pfkp|Mtch2|Dpys|Ppcdc|Ndufb8|Pmvk|Nmrk2|Acot7|Gale|Fam20c|Uck2|Kmo|Dut|Pde2a|Slc2a6|Gimap7|Oas1a|Ccnb1|Ahcy|Tigar|Dnph1|Eno1b	-3.233529066
BP	GO:0072330	monocarboxylic acid biosynthetic process	19_GO:0008152 metabolic process	-5.135218156	5.043678517	36	Apoc2|Cyp7b1|Eno1|Ifng|Il1b|Eif6|Fabp5|Ldha|Ldhc|Lpl|Mif|Pgk1|Pkm|Prkab1|Prox1|Qk|Slc1a3|Sphk1|Tpi1|Nr1h3|Mgll|Asah2|Hpgds|Pfkp|Mtch2|Ptges|Mid1ip1|Acot7|Gale|Acsbg1|Kmo|Slc2a6|Trib3|Liph|Tigar|Eno1b	-3.08693645
BP	GO:0044283	small molecule biosynthetic process	19_GO:0008152 metabolic process	-5.060927821	4.747916073	68	Apoc2|Aprt|Ass1|Atf3|Entpd1|Coq7|Cyp7b1|Dhfr|Egr1|Eno1|Gch1|Glul|Got1|Nr3c1|Hint1|Hmgcs2|Ifng|Il1b|Eif6|Fabp5|Ldha|Ldhc|Lpl|Mif|Nfkb1|Nme1|Nme2|Cd244a|Pdgfb|Pgk1|Pkm|Plcg1|Prkab1|Prox1|Qk|Slc1a3|Sphk1|Tpi1|Nr1h3|Upp1|Mgll|Nt5c|Asah2|Hpgds|Pfkp|Mtch2|Akr1a1|Ptges|Mid1ip1|Pmvk|Acot7|Gale|Uck2|Acsbg1|Kmo|Psat1|Dut|Pde2a|Slc39a14|Slc2a6|Trib3|Acer2|Liph|Csad|Tigar|Dnph1|Atp2b4|Eno1b	-3.029763383
BP	GO:0034404	nucleobase-containing small molecule biosynthetic process	19_GO:0008152 metabolic process	-4.919127898	5.068702547	26	Aprt|Entpd1|Eno1|Hint1|Ifng|Eif6|Ldha|Mif|Nme1|Nme2|Pgk1|Pkm|Tpi1|Upp1|Nt5c|Pfkp|Mtch2|Acot7|Gale|Uck2|Dut|Pde2a|Slc2a6|Tigar|Dnph1|Eno1b	-2.91834609
BP	GO:0009141	nucleoside triphosphate metabolic process	19_GO:0008152 metabolic process	-4.776886542	4.785228583	37	Tspo|Entpd1|Cdk1|Cfh|Coq7|Cox4i1|Cox6a2|Eno1|Fxn|Ifng|Eif6|Ldha|Ldhc|Mif|ND2|Nme1|Nme2|Pgk1|Pkm|Ran|Dtymk|Tpi1|Cmpk2|Uqcrq|Atp5o|Pfkp|Mtch2|Ndufb8|Gale|Fam20c|Dut|Pde2a|Slc2a6|Gimap7|Ccnb1|Tigar|Eno1b	-2.803009584
BP	GO:0046434	organophosphate catabolic process	19_GO:0008152 metabolic process	-4.742472646	4.85997508	30	Prdx6|Apoc2|Entpd1|Eno1|Hint1|Ifng|Eif6|Ldha|Mif|Pgk1|Pkm|Plcg1|Pld1|Scarb1|Tpi1|Upp1|Pla2g7|Nt5c|Pfkp|Mtch2|Plbd1|Acot7|Gale|Dut|Pde2a|Slc2a6|Inpp4b|Tigar|Dnph1|Eno1b	-2.784125293
BP	GO:0009123	nucleoside monophosphate metabolic process	19_GO:0008152 metabolic process	-4.726629956	4.762291112	36	Adssl1|Aprt|Tspo|Entpd1|Cdk1|Cfh|Coq7|Cox4i1|Cox6a2|Eno1|Fxn|Ifng|Eif6|Ldha|Ldhc|Mif|ND2|Pgk1|Pkm|Tpi1|Tyms|Uqcrq|Atp5o|Pfkp|Mtch2|Ndufb8|Gale|Fam20c|Uck2|Dut|Pde2a|Slc2a6|Ccnb1|Tigar|Dnph1|Eno1b	-2.773946854
BP	GO:0009165	nucleotide biosynthetic process	19_GO:0008152 metabolic process	-4.661546113	4.716722245	36	Adora2b|Adssl1|Aprt|Entpd1|Eno1|Gucy2c|Ifng|Eif6|Ldhc|Mif|Nme1|Nme2|Nos2|Pgk1|Pkm|Rrm2|Dtymk|Tpi1|Cmpk2|Tyms|Oasl2|Papss2|Atp5o|Pfkp|Mtch2|Ppcdc|Nmrk2|Acot7|Gale|Uck2|Kmo|Dut|Slc2a6|Oas1a|Tigar|Eno1b	-2.717531852
BP	GO:1901293	nucleoside phosphate biosynthetic process	19_GO:0008152 metabolic process	-4.502428541	4.604376894	36	Adora2b|Adssl1|Aprt|Entpd1|Eno1|Gucy2c|Ifng|Eif6|Ldhc|Mif|Nme1|Nme2|Nos2|Pgk1|Pkm|Rrm2|Dtymk|Tpi1|Cmpk2|Tyms|Oasl2|Papss2|Atp5o|Pfkp|Mtch2|Ppcdc|Nmrk2|Acot7|Gale|Uck2|Kmo|Dut|Slc2a6|Oas1a|Tigar|Eno1b	-2.593044321
BP	GO:0006163	purine nucleotide metabolic process	19_GO:0008152 metabolic process	-4.488638462	4.481797038	49	Adora2b|Adssl1|Aprt|Tspo|Entpd1|Cdk1|Cfh|Coq7|Cox4i1|Cox6a2|Eno1|Epha2|Fxn|Gucy2c|Hint1|Hmgcs2|Ifng|Eif6|Ldha|Ldhc|Mif|ND2|Nme1|Nme2|Nos2|Pgk1|Pkm|Ran|Tpi1|Uqcrq|Oasl2|Papss2|Acot1|Atp5o|Pfkp|Mtch2|Ppcdc|Ndufb8|Pmvk|Acot7|Gale|Fam20c|Pde2a|Slc2a6|Gimap7|Oas1a|Ccnb1|Tigar|Eno1b	-2.582412761
BP	GO:0009205	purine ribonucleoside triphosphate metabolic process	19_GO:0008152 metabolic process	-4.430746364	4.576810494	34	Tspo|Entpd1|Cdk1|Cfh|Coq7|Cox4i1|Cox6a2|Eno1|Fxn|Ifng|Eif6|Ldha|Ldhc|Mif|ND2|Nme1|Nme2|Pgk1|Pkm|Ran|Tpi1|Uqcrq|Atp5o|Pfkp|Mtch2|Ndufb8|Gale|Fam20c|Pde2a|Slc2a6|Gimap7|Ccnb1|Tigar|Eno1b	-2.539787785
BP	GO:0009199	ribonucleoside triphosphate metabolic process	19_GO:0008152 metabolic process	-4.303198255	4.484286169	34	Tspo|Entpd1|Cdk1|Cfh|Coq7|Cox4i1|Cox6a2|Eno1|Fxn|Ifng|Eif6|Ldha|Ldhc|Mif|ND2|Nme1|Nme2|Pgk1|Pkm|Ran|Tpi1|Uqcrq|Atp5o|Pfkp|Mtch2|Ndufb8|Gale|Fam20c|Pde2a|Slc2a6|Gimap7|Ccnb1|Tigar|Eno1b	-2.441784899
BP	GO:0009144	purine nucleoside triphosphate metabolic process	19_GO:0008152 metabolic process	-4.209764757	4.415898479	34	Tspo|Entpd1|Cdk1|Cfh|Coq7|Cox4i1|Cox6a2|Eno1|Fxn|Ifng|Eif6|Ldha|Ldhc|Mif|ND2|Nme1|Nme2|Pgk1|Pkm|Ran|Tpi1|Uqcrq|Atp5o|Pfkp|Mtch2|Ndufb8|Gale|Fam20c|Pde2a|Slc2a6|Gimap7|Ccnb1|Tigar|Eno1b	-2.369135007
BP	GO:1901292	nucleoside phosphate catabolic process	19_GO:0008152 metabolic process	-4.129575335	4.554783301	22	Entpd1|Eno1|Hint1|Ifng|Eif6|Ldha|Mif|Pgk1|Pkm|Tpi1|Upp1|Nt5c|Pfkp|Mtch2|Acot7|Gale|Dut|Pde2a|Slc2a6|Tigar|Dnph1|Eno1b	-2.306187019
BP	GO:0017144	drug metabolic process	19_GO:0008152 metabolic process	-4.075568616	4.105964222	70	Acp5|Adssl1|Afp|Gla|Prdx6|Aprt|Ass1|Tspo|Entpd1|Cdk1|Cfh|Chil3|Coq7|Cox4i1|Cox6a2|Dck|Dhfr|Egr1|Eno1|Esd|Fxn|Gch1|Hmgcs2|Hsp90aa1|Ifng|Il1b|Eif6|Klf4|Ldha|Ldhc|Smad3|Mif|Mdh2|ND2|Nos2|Prdx1|Pde1b|Pgk1|Pkm|Rock2|Sod2|Tpi1|Uqcrq|Tlr2|Klrk1|Pla2g7|Atp5o|Prdx4|Prdx5|Pfkp|Mtch2|Akr1a1|Dpys|Ndufb8|Sncaip|Gcsh|Ddah1|Cyp4f18|Gale|Fam20c|Kmo|Pde2a|Tmem106a|Slc2a6|Amdhd2|Ccnb1|Ahcy|Tigar|Atp2b4|Eno1b	-2.262899003
BP	GO:0072521	purine-containing compound metabolic process	19_GO:0008152 metabolic process	-4.055001632	4.171147101	51	Adora2b|Adssl1|Aprt|Tspo|Entpd1|Cdk1|Cfh|Coq7|Cox4i1|Cox6a2|Eno1|Epha2|Fxn|Gda|Gucy2c|Hint1|Hmgcs2|Ifng|Eif6|Ldha|Ldhc|Mif|ND2|Nme1|Nme2|Nos2|Pgk1|Pkm|Ran|Tpi1|Uqcrq|Oasl2|Papss2|Acot1|Atp5o|Pfkp|Mtch2|Ppcdc|Ndufb8|Pmvk|Acot7|Gale|Fam20c|Pde2a|Slc2a6|Gimap7|Oas1a|Ccnb1|Ahcy|Tigar|Eno1b	-2.253299424
BP	GO:0009259	ribonucleotide metabolic process	19_GO:0008152 metabolic process	-4.038284098	4.188897743	46	Adssl1|Aprt|Tspo|Entpd1|Cdk1|Cfh|Coq7|Cox4i1|Cox6a2|Eno1|Epha2|Fxn|Gucy2c|Hint1|Hmgcs2|Ifng|Eif6|Ldha|Ldhc|Mif|ND2|Nme1|Nme2|Pgk1|Pkm|Ran|Tpi1|Uqcrq|Papss2|Acot1|Atp5o|Pfkp|Mtch2|Ppcdc|Ndufb8|Pmvk|Acot7|Gale|Fam20c|Uck2|Pde2a|Slc2a6|Gimap7|Ccnb1|Tigar|Eno1b	-2.241377668
BP	GO:0009150	purine ribonucleotide metabolic process	19_GO:0008152 metabolic process	-3.976244636	4.151007781	45	Adssl1|Aprt|Tspo|Entpd1|Cdk1|Cfh|Coq7|Cox4i1|Cox6a2|Eno1|Epha2|Fxn|Gucy2c|Hint1|Hmgcs2|Ifng|Eif6|Ldha|Ldhc|Mif|ND2|Nme1|Nme2|Pgk1|Pkm|Ran|Tpi1|Uqcrq|Papss2|Acot1|Atp5o|Pfkp|Mtch2|Ppcdc|Ndufb8|Pmvk|Acot7|Gale|Fam20c|Pde2a|Slc2a6|Gimap7|Ccnb1|Tigar|Eno1b	-2.197311577
BP	GO:0009132	nucleoside diphosphate metabolic process	19_GO:0008152 metabolic process	-3.895965958	4.442016733	19	Entpd1|Eno1|Ifng|Eif6|Ldha|Mif|Nme1|Nme2|Pgk1|Pkm|Dtymk|Tpi1|Cmpk2|Pfkp|Mtch2|Gale|Slc2a6|Tigar|Eno1b	-2.139895782
BP	GO:0009161	ribonucleoside monophosphate metabolic process	19_GO:0008152 metabolic process	-3.884111725	4.183739666	33	Adssl1|Aprt|Tspo|Entpd1|Cdk1|Cfh|Coq7|Cox4i1|Cox6a2|Eno1|Fxn|Ifng|Eif6|Ldha|Ldhc|Mif|ND2|Pgk1|Pkm|Tpi1|Uqcrq|Atp5o|Pfkp|Mtch2|Ndufb8|Gale|Fam20c|Uck2|Pde2a|Slc2a6|Ccnb1|Tigar|Eno1b	-2.13026301
BP	GO:0009166	nucleotide catabolic process	19_GO:0008152 metabolic process	-3.735015736	4.277734806	20	Eno1|Hint1|Ifng|Eif6|Ldha|Mif|Pgk1|Pkm|Tpi1|Upp1|Nt5c|Pfkp|Mtch2|Acot7|Gale|Dut|Pde2a|Slc2a6|Tigar|Eno1b	-2.019324722
BP	GO:0046034	ATP metabolic process	19_GO:0008152 metabolic process	-3.687483512	4.065788017	30	Tspo|Entpd1|Cdk1|Cfh|Coq7|Cox4i1|Cox6a2|Eno1|Fxn|Ifng|Eif6|Ldha|Ldhc|Mif|ND2|Pgk1|Pkm|Tpi1|Uqcrq|Atp5o|Pfkp|Mtch2|Ndufb8|Gale|Fam20c|Pde2a|Slc2a6|Ccnb1|Tigar|Eno1b	-1.989683588
BP	GO:0009167	purine ribonucleoside monophosphate metabolic process	19_GO:0008152 metabolic process	-3.65391712	4.017029644	32	Adssl1|Aprt|Tspo|Entpd1|Cdk1|Cfh|Coq7|Cox4i1|Cox6a2|Eno1|Fxn|Ifng|Eif6|Ldha|Ldhc|Mif|ND2|Pgk1|Pkm|Tpi1|Uqcrq|Atp5o|Pfkp|Mtch2|Ndufb8|Gale|Fam20c|Pde2a|Slc2a6|Ccnb1|Tigar|Eno1b	-1.964420232
BP	GO:0019693	ribose phosphate metabolic process	19_GO:0008152 metabolic process	-3.653543618	3.909395122	46	Adssl1|Aprt|Tspo|Entpd1|Cdk1|Cfh|Coq7|Cox4i1|Cox6a2|Eno1|Epha2|Fxn|Gucy2c|Hint1|Hmgcs2|Ifng|Eif6|Ldha|Ldhc|Mif|ND2|Nme1|Nme2|Pgk1|Pkm|Ran|Tpi1|Uqcrq|Papss2|Acot1|Atp5o|Pfkp|Mtch2|Ppcdc|Ndufb8|Pmvk|Acot7|Gale|Fam20c|Uck2|Pde2a|Slc2a6|Gimap7|Ccnb1|Tigar|Eno1b	-1.964420232
BP	GO:0009126	purine nucleoside monophosphate metabolic process	19_GO:0008152 metabolic process	-3.625581887	3.994855666	32	Adssl1|Aprt|Tspo|Entpd1|Cdk1|Cfh|Coq7|Cox4i1|Cox6a2|Eno1|Fxn|Ifng|Eif6|Ldha|Ldhc|Mif|ND2|Pgk1|Pkm|Tpi1|Uqcrq|Atp5o|Pfkp|Mtch2|Ndufb8|Gale|Fam20c|Pde2a|Slc2a6|Ccnb1|Tigar|Eno1b	-1.942699346
BP	GO:0006165	nucleoside diphosphate phosphorylation	19_GO:0008152 metabolic process	-3.340194747	4.042258678	16	Eno1|Ifng|Eif6|Mif|Nme1|Nme2|Pgk1|Pkm|Tpi1|Cmpk2|Pfkp|Mtch2|Gale|Slc2a6|Tigar|Eno1b	-1.712391251
BP	GO:0090407	organophosphate biosynthetic process	19_GO:0008152 metabolic process	-3.293467709	3.622580541	49	Adora2b|Adssl1|Aprt|Entpd1|Chka|Eno1|Fabp3|Gucy2c|Hmgcs2|Ifng|Eif6|Fabp5|Ldhc|Mif|Nme1|Nme2|Cd244a|Nos2|Pdgfb|Pgk1|Pkm|Plcg1|Pld1|Rrm2|Dtymk|Tpi1|Plscr1|Cmpk2|Tyms|Oasl2|Papss2|Atp5o|Pfkp|Mtch2|Ppcdc|Agpat4|Mocos|Pmvk|Nmrk2|Acot7|Gale|Uck2|Kmo|Dut|Slc2a6|Gpat3|Oas1a|Tigar|Eno1b	-1.675497716
BP	GO:0046939	nucleotide phosphorylation	19_GO:0008152 metabolic process	-3.248027878	3.956619282	16	Eno1|Ifng|Eif6|Mif|Nme1|Nme2|Pgk1|Pkm|Tpi1|Cmpk2|Pfkp|Mtch2|Gale|Slc2a6|Tigar|Eno1b	-1.639166875
BP	GO:0006164	purine nucleotide biosynthetic process	19_GO:0008152 metabolic process	-3.195880137	3.68948963	28	Adora2b|Adssl1|Aprt|Entpd1|Eno1|Gucy2c|Ifng|Eif6|Ldhc|Mif|Nme1|Nme2|Nos2|Pgk1|Pkm|Tpi1|Oasl2|Papss2|Atp5o|Pfkp|Mtch2|Ppcdc|Acot7|Gale|Slc2a6|Oas1a|Tigar|Eno1b	-1.600024458
BP	GO:0006633	fatty acid biosynthetic process	19_GO:0008152 metabolic process	-3.063406637	3.709693376	19	Apoc2|Il1b|Eif6|Fabp5|Lpl|Mif|Prkab1|Qk|Sphk1|Nr1h3|Mgll|Asah2|Hpgds|Ptges|Mid1ip1|Acot7|Acsbg1|Trib3|Liph	-1.498027229
BP	GO:0072522	purine-containing compound biosynthetic process	19_GO:0008152 metabolic process	-3.058958559	3.573633288	28	Adora2b|Adssl1|Aprt|Entpd1|Eno1|Gucy2c|Ifng|Eif6|Ldhc|Mif|Nme1|Nme2|Nos2|Pgk1|Pkm|Tpi1|Oasl2|Papss2|Atp5o|Pfkp|Mtch2|Ppcdc|Acot7|Gale|Slc2a6|Oas1a|Tigar|Eno1b	-1.494296401
BP	GO:0009124	nucleoside monophosphate biosynthetic process	19_GO:0008152 metabolic process	-2.952873452	3.571944651	21	Adssl1|Aprt|Entpd1|Eno1|Ifng|Eif6|Ldhc|Mif|Pgk1|Pkm|Tpi1|Tyms|Atp5o|Pfkp|Mtch2|Gale|Uck2|Dut|Slc2a6|Tigar|Eno1b	-1.407827927
BP	GO:0009135	purine nucleoside diphosphate metabolic process	19_GO:0008152 metabolic process	-2.872906933	3.628356709	15	Entpd1|Eno1|Ifng|Eif6|Ldha|Mif|Pgk1|Pkm|Tpi1|Pfkp|Mtch2|Gale|Slc2a6|Tigar|Eno1b	-1.352259577
BP	GO:0009179	purine ribonucleoside diphosphate metabolic process	19_GO:0008152 metabolic process	-2.872906933	3.628356709	15	Entpd1|Eno1|Ifng|Eif6|Ldha|Mif|Pgk1|Pkm|Tpi1|Pfkp|Mtch2|Gale|Slc2a6|Tigar|Eno1b	-1.352259577
BP	GO:0009142	nucleoside triphosphate biosynthetic process	19_GO:0008152 metabolic process	-2.802881782	3.450701126	20	Entpd1|Eno1|Ifng|Eif6|Ldhc|Mif|Nme1|Nme2|Pgk1|Pkm|Dtymk|Tpi1|Cmpk2|Atp5o|Pfkp|Mtch2|Gale|Slc2a6|Tigar|Eno1b	-1.301012751
BP	GO:0009185	ribonucleoside diphosphate metabolic process	19_GO:0008152 metabolic process	-2.709300789	3.466536363	15	Entpd1|Eno1|Ifng|Eif6|Ldha|Mif|Pgk1|Pkm|Tpi1|Pfkp|Mtch2|Gale|Slc2a6|Tigar|Eno1b	-1.244690544
BP	GO:0046031	ADP metabolic process	19_GO:0008152 metabolic process	-2.632681192	3.417324081	14	Eno1|Ifng|Eif6|Ldha|Mif|Pgk1|Pkm|Tpi1|Pfkp|Mtch2|Gale|Slc2a6|Tigar|Eno1b	-1.181521141
BP	GO:0019363	pyridine nucleotide biosynthetic process	19_GO:0008152 metabolic process	-2.631195828	3.388246233	15	Eno1|Ifng|Eif6|Mif|Pgk1|Pkm|Tpi1|Pfkp|Mtch2|Nmrk2|Gale|Kmo|Slc2a6|Tigar|Eno1b	-1.181138048
BP	GO:0006096	glycolytic process	19_GO:0008152 metabolic process	-2.557866686	3.370730505	13	Eno1|Ifng|Eif6|Mif|Pgk1|Pkm|Tpi1|Pfkp|Mtch2|Gale|Slc2a6|Tigar|Eno1b	-1.132290487
BP	GO:0009108	coenzyme biosynthetic process	19_GO:0008152 metabolic process	-2.534108133	3.1690387	22	Coq7|Dhfr|Eno1|Gch1|Ifng|Eif6|Mif|Pgk1|Pkm|Tpi1|Pfkp|Mtch2|Akr1a1|Ppcdc|Mocos|Nmrk2|Acot7|Gale|Kmo|Slc2a6|Tigar|Eno1b	-1.114801198
BP	GO:0006757	ATP generation from ADP	19_GO:0008152 metabolic process	-2.515930619	3.326662587	13	Eno1|Ifng|Eif6|Mif|Pgk1|Pkm|Tpi1|Pfkp|Mtch2|Gale|Slc2a6|Tigar|Eno1b	-1.102283123
BP	GO:0009260	ribonucleotide biosynthetic process	19_GO:0008152 metabolic process	-2.489966246	3.09473772	25	Adssl1|Aprt|Entpd1|Eno1|Gucy2c|Ifng|Eif6|Ldhc|Mif|Nme1|Nme2|Pgk1|Pkm|Tpi1|Papss2|Atp5o|Pfkp|Mtch2|Ppcdc|Acot7|Gale|Uck2|Slc2a6|Tigar|Eno1b	-1.085078492
BP	GO:0072525	pyridine-containing compound biosynthetic process	19_GO:0008152 metabolic process	-2.481910327	3.236544996	15	Eno1|Ifng|Eif6|Mif|Pgk1|Pkm|Tpi1|Pfkp|Mtch2|Nmrk2|Gale|Kmo|Slc2a6|Tigar|Eno1b	-1.078463349
BP	GO:0009206	purine ribonucleoside triphosphate biosynthetic process	19_GO:0008152 metabolic process	-2.471736765	3.166109468	18	Entpd1|Eno1|Ifng|Eif6|Ldhc|Mif|Nme1|Nme2|Pgk1|Pkm|Tpi1|Atp5o|Pfkp|Mtch2|Gale|Slc2a6|Tigar|Eno1b	-1.070562685
BP	GO:0009145	purine nucleoside triphosphate biosynthetic process	19_GO:0008152 metabolic process	-2.440872083	3.135404834	18	Entpd1|Eno1|Ifng|Eif6|Ldhc|Mif|Nme1|Nme2|Pgk1|Pkm|Tpi1|Atp5o|Pfkp|Mtch2|Gale|Slc2a6|Tigar|Eno1b	-1.051823149
BP	GO:0009152	purine ribonucleotide biosynthetic process	19_GO:0008152 metabolic process	-2.402389147	3.02126015	24	Adssl1|Aprt|Entpd1|Eno1|Gucy2c|Ifng|Eif6|Ldhc|Mif|Nme1|Nme2|Pgk1|Pkm|Tpi1|Papss2|Atp5o|Pfkp|Mtch2|Ppcdc|Acot7|Gale|Slc2a6|Tigar|Eno1b	-1.021473767
BP	GO:0042866	pyruvate biosynthetic process	19_GO:0008152 metabolic process	-2.394485125	3.197796814	13	Eno1|Ifng|Eif6|Mif|Pgk1|Pkm|Tpi1|Pfkp|Mtch2|Gale|Slc2a6|Tigar|Eno1b	-1.020696423
BP	GO:0051188	cofactor biosynthetic process	19_GO:0008152 metabolic process	-2.389031533	2.990272822	26	Coq7|Dhfr|Eno1|Fxn|Gch1|Ifng|Eif6|Mif|Pgk1|Pkm|Sod2|Tpi1|Slc7a11|Pfkp|Mtch2|Akr1a1|Ppcdc|Mocos|Nmrk2|Acot7|Gale|Kmo|Ggt7|Slc2a6|Tigar|Eno1b	-1.018246729
BP	GO:0051186	cofactor metabolic process	19_GO:0008152 metabolic process	-2.385428621	2.883460421	46	Prdx6|Coq7|Dhfr|Eno1|Fxn|Gch1|Got1|Gsr|Hebp1|Hmgcs2|Ifng|Eif6|Ldha|Mif|Mdh2|Prdx1|Pgk1|Pkm|Sod2|Tpi1|Tyms|Nubp1|Slc7a11|Acot1|Prdx4|Hpgds|Prdx5|Pfkp|Mtch2|Akr1a1|Ppcdc|Ciao2a|Mocos|Pmvk|Chac1|Nmrk2|Acot7|Aifm2|Cyp4f18|Gale|Kmo|Ggt7|Slc2a6|Ahcy|Tigar|Eno1b	-1.017212825
BP	GO:0016052	carbohydrate catabolic process	19_GO:0008152 metabolic process	-2.384265496	3.095702739	17	Chil3|Eno1|Ifng|Eif6|Ldha|Mif|Pgk1|Pkm|Ppp1ca|Tpi1|Pfkp|Mtch2|Akr1a1|Gale|Slc2a6|Tigar|Eno1b	-1.017212825
BP	GO:0009156	ribonucleoside monophosphate biosynthetic process	19_GO:0008152 metabolic process	-2.380721321	3.059826207	19	Adssl1|Aprt|Entpd1|Eno1|Ifng|Eif6|Ldhc|Mif|Pgk1|Pkm|Tpi1|Atp5o|Pfkp|Mtch2|Gale|Uck2|Slc2a6|Tigar|Eno1b	-1.017212825
BP	GO:0009201	ribonucleoside triphosphate biosynthetic process	19_GO:0008152 metabolic process	-2.380257041	3.074694485	18	Entpd1|Eno1|Ifng|Eif6|Ldhc|Mif|Nme1|Nme2|Pgk1|Pkm|Tpi1|Atp5o|Pfkp|Mtch2|Gale|Slc2a6|Tigar|Eno1b	-1.017199292
BP	GO:0046390	ribose phosphate biosynthetic process	19_GO:0008152 metabolic process	-2.324976108	2.937448353	25	Adssl1|Aprt|Entpd1|Eno1|Gucy2c|Ifng|Eif6|Ldhc|Mif|Nme1|Nme2|Pgk1|Pkm|Tpi1|Papss2|Atp5o|Pfkp|Mtch2|Ppcdc|Acot7|Gale|Uck2|Slc2a6|Tigar|Eno1b	-0.973476519
BP	GO:0006090	pyruvate metabolic process	19_GO:0008152 metabolic process	-2.307411244	3.055401624	15	Eno1|Ifng|Eif6|Ldha|Ldhc|Mif|Pgk1|Pkm|Tpi1|Pfkp|Mtch2|Gale|Slc2a6|Tigar|Eno1b	-0.958603121
BP	GO:1900542	regulation of purine nucleotide metabolic process	19_GO:0008152 metabolic process	-2.290531056	3.060189832	14	Adora2b|Tspo|Entpd1|Cdk1|Ifng|Eif6|Mif|Nos2|Pgk1|Mtch2|Pde2a|Slc2a6|Ccnb1|Tigar	-0.949300414
BP	GO:1901137	carbohydrate derivative biosynthetic process	19_GO:0008152 metabolic process	-2.272703131	2.76747573	51	Adssl1|Aprt|Entpd1|Ccr7|Eno1|Gcnt2|Gucy2c|Hbegf|Ifng|Il1b|Eif6|Ldhc|Mif|Nfkb1|Nme1|Nme2|Pdgfb|Pgk1|Pkm|Rrm2|St3gal1|St3gal4|St8sia1|Soat1|Dtymk|Tpi1|Cmpk2|Tyms|Papss2|Atp5o|St3gal6|Chp1|Pfkp|Mtch2|Aqp11|Ppcdc|Chst8|Acot7|B3gnt3|Gale|B3gat1|Uck2|B3gnt5|Dut|Tmem106a|Slc2a6|Acer2|B3gnt8|Mgat4a|Tigar|Eno1b	-0.936715709
BP	GO:0044270	cellular nitrogen compound catabolic process	19_GO:0008152 metabolic process	-2.23528272	2.756455962	43	Bax|Entpd1|Dnase1l3|E2f1|Eno1|Gda|Hint1|Ifng|Eif6|Ldha|Mif|Pgk1|Pkm|Qk|Rock2|Tpi1|Tob1|Upp1|Vim|Nt5c|Carhsp1|Pfkp|Mtch2|Pkp3|Isg20|Dpys|Dnase1l1|Acot7|Gale|Kmo|Dut|Hnmt|Pde2a|Tnrc6c|Slc2a6|Pabpc4|Smg1|Zc3h12d|Ahcy|Tigar|Dna2|Dnph1|Eno1b	-0.910988548
BP	GO:0006732	coenzyme metabolic process	19_GO:0008152 metabolic process	-2.167126923	2.737547927	32	Coq7|Dhfr|Eno1|Gch1|Hmgcs2|Ifng|Eif6|Ldha|Mif|Mdh2|Pgk1|Pkm|Tpi1|Tyms|Acot1|Prdx5|Pfkp|Mtch2|Akr1a1|Ppcdc|Mocos|Pmvk|Nmrk2|Acot7|Aifm2|Cyp4f18|Gale|Kmo|Slc2a6|Ahcy|Tigar|Eno1b	-0.8645319
BP	GO:0006140	regulation of nucleotide metabolic process	19_GO:0008152 metabolic process	-2.153527109	2.912412031	14	Adora2b|Tspo|Entpd1|Cdk1|Ifng|Eif6|Mif|Nos2|Pgk1|Mtch2|Pde2a|Slc2a6|Ccnb1|Tigar	-0.854056521
BP	GO:0009127	purine nucleoside monophosphate biosynthetic process	19_GO:0008152 metabolic process	-2.151906244	2.840669396	18	Adssl1|Aprt|Entpd1|Eno1|Ifng|Eif6|Ldhc|Mif|Pgk1|Pkm|Tpi1|Atp5o|Pfkp|Mtch2|Gale|Slc2a6|Tigar|Eno1b	-0.853213265
BP	GO:0009168	purine ribonucleoside monophosphate biosynthetic process	19_GO:0008152 metabolic process	-2.151906244	2.840669396	18	Adssl1|Aprt|Entpd1|Eno1|Ifng|Eif6|Ldhc|Mif|Pgk1|Pkm|Tpi1|Atp5o|Pfkp|Mtch2|Gale|Slc2a6|Tigar|Eno1b	-0.853213265
BP	GO:0046700	heterocycle catabolic process	19_GO:0008152 metabolic process	-2.145135846	2.671973761	43	Bax|Entpd1|Dnase1l3|E2f1|Eno1|Gda|Hint1|Ifng|Eif6|Ldha|Mif|Pgk1|Pkm|Qk|Rock2|Tpi1|Tob1|Upp1|Vim|Nt5c|Carhsp1|Pfkp|Mtch2|Pkp3|Isg20|Dpys|Dnase1l1|Acot7|Gale|Kmo|Dut|Hnmt|Pde2a|Tnrc6c|Slc2a6|Pabpc4|Smg1|Zc3h12d|Ahcy|Tigar|Dna2|Dnph1|Eno1b	-0.848871376
BP	GO:0006733	oxidoreduction coenzyme metabolic process	19_GO:0008152 metabolic process	-2.122908542	2.785281972	20	Coq7|Eno1|Ifng|Eif6|Ldha|Mif|Mdh2|Pgk1|Pkm|Tpi1|Prdx5|Pfkp|Mtch2|Nmrk2|Aifm2|Gale|Kmo|Slc2a6|Tigar|Eno1b	-0.834579246
BP	GO:0034655	nucleobase-containing compound catabolic process	19_GO:0008152 metabolic process	-2.070178292	2.613503087	39	Bax|Entpd1|Dnase1l3|E2f1|Eno1|Hint1|Ifng|Eif6|Ldha|Mif|Pgk1|Pkm|Qk|Rock2|Tpi1|Tob1|Upp1|Vim|Nt5c|Carhsp1|Pfkp|Mtch2|Pkp3|Isg20|Dnase1l1|Acot7|Gale|Dut|Pde2a|Tnrc6c|Slc2a6|Pabpc4|Smg1|Zc3h12d|Ahcy|Tigar|Dna2|Dnph1|Eno1b	-0.797379815
BP	GO:0006754	ATP biosynthetic process	19_GO:0008152 metabolic process	-2.055793598	2.768527523	16	Entpd1|Eno1|Ifng|Eif6|Ldhc|Mif|Pgk1|Pkm|Tpi1|Atp5o|Pfkp|Mtch2|Gale|Slc2a6|Tigar|Eno1b	-0.78493507
MF	GO:0005089	Rho guanyl-nucleotide exchange factor activity		-5.99400747	6.260672205	17	Ect2|Itsn2|Sos1|Vav2|Fgd2|Net1|Eps8l1|Arhgef6|Arhgef18|Dock9|Dock10|Trio|Arhgef4|Dock4|Arhgef40|Prex1|Arhgef26	-3.736777798
MF	GO:0005088	Ras guanyl-nucleotide exchange factor activity		-5.280815156	5.454064771	22	Ect2|Itsn2|Sos1|Vav2|Fgd2|Net1|Eps8l1|Rgl3|Arhgef6|Arhgef18|Dock9|Dock10|Rapgef5|Trio|Arhgef4|Dock4|Rasgrp3|Arhgef40|Prex1|Sbf2|Dennd2c|Arhgef26	-3.181653639
MF	GO:0005085	guanyl-nucleotide exchange factor activity		-4.632741144	4.815340543	28	Ect2|Itsn2|Sos1|Vav2|Fgd2|Net1|Sec61b|Eps8l1|Rgl3|Tagap|Arhgef6|Arhgef18|Dock9|Mycbp2|Elmo1|Hps4|Dock10|Fnip1|Rapgef5|Trio|Arhgef4|Dock4|Rasgrp3|Arhgef40|Prex1|Sbf2|Dennd2c|Arhgef26	-2.695539485
MF	GO:0017048	Rho GTPase binding		-4.265266422	4.616370582	24	Ect2|Srgap2|Rock2|Itsn2|Sos1|Vav2|Fmnl3|Coro1c|Fgd2|Net1|Eps8l1|Anln|Inf2|Arhgef6|Arhgef18|Dock9|Elmo1|Dock10|Trio|Arhgef4|Dock4|Arhgef40|Prex1|Arhgef26	-2.408090118
MF	GO:0051020	GTPase binding		-4.072195237	4.172612506	53	Birc5|Anxa2|Ect2|Ehd1|Eno1|Evi5|Srgap2|Hsp90aa1|Ndrg1|Rock2|Itsn2|Sos1|Vav2|Fmnl3|Coro1c|Fgd2|Bin1|Net1|Sec61b|Eps8l1|Anln|Inf2|Rgl3|Tbc1d5|Wdr44|Tagap|Arhgef6|Bicdl1|Bicd2|Sh3bp4|Exoc8|Arhgef18|Dock9|Mycbp2|Elmo1|Mlph|Hps4|Dock10|Fnip1|Rapgef5|Rasa1|Trio|Arhgef4|Dock4|Rasgrp3|Ppp1r9a|Arhgef40|Prex1|Sbf2|Dennd2c|Eno1b|Arhgef26|Pifo	-2.262879549
MF	GO:0017016	Ras GTPase binding		-4.034475441	4.199542626	44	Birc5|Anxa2|Ect2|Ehd1|Evi5|Srgap2|Ndrg1|Rock2|Itsn2|Sos1|Vav2|Fmnl3|Coro1c|Fgd2|Net1|Eps8l1|Anln|Inf2|Rgl3|Tbc1d5|Wdr44|Arhgef6|Bicdl1|Bicd2|Sh3bp4|Exoc8|Arhgef18|Dock9|Mycbp2|Elmo1|Mlph|Hps4|Dock10|Rapgef5|Trio|Arhgef4|Dock4|Rasgrp3|Arhgef40|Prex1|Sbf2|Dennd2c|Arhgef26|Pifo	-2.238790656
BP	GO:0007266	Rho protein signal transduction	19_GO:0023052 signaling	-3.791428326	4.238088843	24	Abl1|Col1a2|Ect2|Pdpn|Adgrg1|Rock2|Itsn2|Sos1|Vav2|Fgd2|Net1|Gpr35|Eps8l1|Arhgef6|Ophn1|Arhgef18|Arap3|Gpr18|Trio|Arhgef4|Gpr55|Rhov|Arhgef40|Prex1	-2.061797035
BP	GO:0035023	regulation of Rho protein signal transduction	19_GO:0023052 signaling	-3.778266472	4.314450669	20	Abl1|Ect2|Adgrg1|Itsn2|Sos1|Vav2|Fgd2|Net1|Gpr35|Eps8l1|Arhgef6|Ophn1|Arhgef18|Arap3|Gpr18|Trio|Arhgef4|Gpr55|Arhgef40|Prex1	-2.054380979
MF	GO:0031267	small GTPase binding		-3.682834682	3.94290875	44	Birc5|Anxa2|Ect2|Ehd1|Evi5|Srgap2|Ndrg1|Rock2|Itsn2|Sos1|Vav2|Fmnl3|Coro1c|Fgd2|Net1|Eps8l1|Anln|Inf2|Rgl3|Tbc1d5|Wdr44|Arhgef6|Bicdl1|Bicd2|Sh3bp4|Exoc8|Arhgef18|Dock9|Mycbp2|Elmo1|Mlph|Hps4|Dock10|Rapgef5|Trio|Arhgef4|Dock4|Rasgrp3|Arhgef40|Prex1|Sbf2|Dennd2c|Arhgef26|Pifo	-1.986007422
BP	GO:0007264	small GTPase mediated signal transduction	19_GO:0023052 signaling	-2.422834781	2.939003361	40	Abl1|Rhob|Col1a2|Ect2|Pdpn|Adgrg1|Rock2|Itsn2|Sos1|Vav2|Spry1|Fgd2|Net1|Gpr35|Eps8l1|Rhobtb1|Rgl3|Arhgef6|Rap2b|Rnd3|Arhgap12|Gpsm2|Ophn1|Garnl3|Arhgef18|Dock9|Arap3|Gpr18|Elmo1|Dock10|Rapgef5|Trio|Arhgef4|Gpr55|Rhov|Dock4|Rasgrp3|Arhgef40|Prex1|Rasal3	-1.039487826
CC	GO:0005813	centrosome		-5.957961806	5.306461607	64	Aspm|Ccnb2|Ccne1|Ccnf|Cdc25b|Cdk1|E2f1|Itgb1bp1|Lck|Marcks|Smad7|Rab8a|Ndrg1|Nek2|Nme1|Pcm1|Plk1|Psen2|Psmb5|Rock2|Itsn2|Plk4|Aurkb|Aurka|Tacc3|Tap1|Traf5|Cdh23|Wrn|Clic4|Knstrn|Usp2|Spag5|Rad18|Tctex1d2|Rgcc|Ndc80|Pclaf|Nudt21|Ppp1r42|Ist1|Sgo1|Mvb12a|Kif2c|Cep55|Bicdl1|Pcgf5|Gpsm2|Haus8|Bicd2|Rilpl2|Ckap2|Cep152|Cdc20|Hnmt|Ttc28|Cep68|Ofd1|Ccnb1|Bbs9|Hook3|Lrif1|Brsk1|Cep85l	-3.707737036
CC	GO:0005815	microtubule organizing center		-5.79195506	5.156546782	74	Birc5|Aspm|Capg|Ccnb2|Ccne1|Ccnf|Cdc25b|Cdk1|E2f1|Itgb1bp1|Lck|Marcks|Smad7|Rab8a|Ndrg1|Nek2|Nme1|Pcm1|Plk1|Psen2|Psmb4|Psmb5|Ran|Rock2|Itsn2|Plk4|Aurkb|Aurka|Tacc3|Tap1|Traf5|Cdh23|Wrn|Clic4|Knstrn|Usp2|Spag5|Rad18|Tctex1d2|Rgcc|Ndc80|Pclaf|Nudt21|Ppp1r42|Ist1|Sgo1|Mvb12a|Whrn|Kif2c|Cep55|Bicdl1|Pcgf5|Gpsm2|Haus8|Clasp2|Bicd2|Rilpl2|Ckap2|Cep152|Tedc1|Cdc20|Hnmt|Mlph|Ttc28|Cep68|Ofd1|Ccnb1|Bbs9|…	-3.587835078
CC	GO:0034451	centriolar satellite		-2.801699158	3.588491092	14	Itgb1bp1|Pcm1|Plk1|Tacc3|Tap1|Knstrn|Spag5|Nudt21|Cep55|Cep68|Ofd1|Bbs9|Hook3|Lrif1	-1.301012751
MF	GO:0005504	fatty acid binding		-5.92805787	6.457578889	14	Afp|Fabp4|Apoc1|Fabp7|Fabp3|Id3|Fabp5|Nme2|S100a8|S100a9|Stx3|Ffar4|Afm|Gpr31b	-3.681293632
MF	GO:0031406	carboxylic acid binding		-3.672649632	4.079359727	28	Afp|Fabp4|Apoc1|Ass1|Fabp7|Cd44|Dhfr|Fabp3|Fcnb|Glul|Glrb|Got1|Id3|Fabp5|Nme2|Nos2|S100a8|S100a9|Slc1a3|Stx3|Tyms|Dpys|Ddah1|Ffar4|Egln3|Layn|Afm|Gpr31b	-1.977586102
MF	GO:0043177	organic acid binding		-3.572045483	3.986165594	29	Afp|Fabp4|Apoc1|Ass1|Fabp7|Cd44|Dhfr|Fabp3|Fcnb|Glul|Glrb|Got1|Id3|Fabp5|Nme2|Nos2|S100a8|S100a9|Slc1a3|Stx3|Tyms|Dpys|Ddah1|Ffar4|Hba-a2|Egln3|Layn|Afm|Gpr31b	-1.900778249
MF	GO:0033293	monocarboxylic acid binding		-3.550589513	4.316383517	14	Afp|Fabp4|Apoc1|Fabp7|Fabp3|Id3|Fabp5|Nme2|S100a8|S100a9|Stx3|Ffar4|Afm|Gpr31b	-1.881973109
BP	GO:0034341	response to interferon-gamma	19_GO:0002376 immune system process	-5.854897981	5.808891904	24	Aqp4|Arg1|Capg|Gbp2|Gch1|H2-Aa|H2-Ab1|Ifng|Acod1|Mrc1|Nos2|Ccl6|Ccl7|Ccl9|Cd40|Vim|Tlr2|Mefv|Cxcl16|Ifitm3|Ifitm1|Stx11|Ifitm2|Gsn	-3.625877048
BP	GO:0071346	cellular response to interferon-gamma	19_GO:0002376 immune system process	-2.987532441	3.710798101	16	Aqp4|Arg1|Capg|Gbp2|H2-Ab1|Ifng|Acod1|Mrc1|Nos2|Ccl6|Ccl7|Ccl9|Vim|Tlr2|Stx11|Gsn	-1.437382848
BP	GO:0043491	protein kinase B signaling	19_GO:0023052 signaling	-5.849497461	5.635425579	30	Adam8|Csf3|Ddit3|Eng|Epha2|F10|F7|Gcnt2|Rack1|Hbegf|Hpse|Hsp90aa1|Igf2|Igfbp5|Il1b|Itgb1bp1|Klf4|Mertk|Osm|Tgfbr1|Thbs1|Cd40|Phlda3|Mfhas1|Ramp3|Mtdh|P2ry12|Inpp4b|Tspyl5|Bank1	-3.625877048
BP	GO:0051896	regulation of protein kinase B signaling	19_GO:0023052 signaling	-5.84703343	5.709694867	27	Adam8|Csf3|Ddit3|Eng|Epha2|F10|F7|Gcnt2|Rack1|Hbegf|Hpse|Hsp90aa1|Igf2|Igfbp5|Itgb1bp1|Klf4|Osm|Tgfbr1|Thbs1|Phlda3|Mfhas1|Ramp3|Mtdh|P2ry12|Inpp4b|Tspyl5|Bank1	-3.625877048
BP	GO:0051897	positive regulation of protein kinase B signaling	19_GO:0048518 positive regulation of biological process	-5.301312091	5.547303499	20	Adam8|Csf3|Eng|F10|F7|Gcnt2|Hbegf|Hpse|Hsp90aa1|Igf2|Igfbp5|Itgb1bp1|Osm|Tgfbr1|Thbs1|Mfhas1|Ramp3|Mtdh|P2ry12|Tspyl5	-3.197215357
BP	GO:0072593	reactive oxygen species metabolic process	19_GO:0008152 metabolic process	-5.842478397	5.468283057	39	Acp5|Gla|Prdx6|Arg2|Ass1|Tspo|Cdkn1a|Coq7|Dhfr|Gch1|Cxcl1|Hsp90aa1|Ifng|Il1b|Acod1|Eif6|Klf4|Smad3|ND2|Nos2|Prdx1|Pdgfb|Rock2|Sod2|Tgfbr2|Thbs1|Tlr2|Klrk1|Prdx4|Slc5a3|Prdx5|Ddah1|Noxo1|Tmem106a|Eif5a|Prex1|Tigar|Parl|Atp2b4	-3.625677382
BP	GO:2000377	regulation of reactive oxygen species metabolic process	19_GO:0008152 metabolic process	-5.815226138	5.589972172	31	Acp5|Gla|Arg2|Ass1|Tspo|Cdkn1a|Coq7|Dhfr|Gch1|Cxcl1|Hsp90aa1|Ifng|Il1b|Acod1|Eif6|Klf4|Smad3|Pdgfb|Rock2|Sod2|Tgfbr2|Thbs1|Tlr2|Klrk1|Slc5a3|Ddah1|Tmem106a|Eif5a|Tigar|Parl|Atp2b4	-3.604811922
BP	GO:2001057	reactive nitrogen species metabolic process	19_GO:0008152 metabolic process	-5.679114199	5.944344939	18	Acp5|Gla|Ass1|Tspo|Hsp90aa1|Ifng|Il1b|Klf4|Smad3|Nos2|Rock2|Sod2|Tlr2|Klrk1|Prdx5|Ddah1|Tmem106a|Atp2b4	-3.496332272
BP	GO:0046209	nitric oxide metabolic process	19_GO:0008152 metabolic process	-5.415590568	5.790261628	17	Acp5|Gla|Ass1|Tspo|Hsp90aa1|Ifng|Il1b|Klf4|Smad3|Nos2|Rock2|Sod2|Tlr2|Klrk1|Ddah1|Tmem106a|Atp2b4	-3.288563873
BP	GO:0042133	neurotransmitter metabolic process	19_GO:0008152 metabolic process	-5.246386673	5.36352742	24	Acp5|Gla|Ass1|Tspo|Chka|Gch1|Hsp90aa1|Ifng|Il1b|Klf4|Smad3|Nos2|Pde1b|Rock2|Slc1a3|Sod2|Tlr2|Klrk1|Dpys|Gcsh|Ddah1|Hnmt|Tmem106a|Atp2b4	-3.162429836
BP	GO:0006809	nitric oxide biosynthetic process	19_GO:0008152 metabolic process	-5.074636951	5.567045521	16	Acp5|Gla|Ass1|Tspo|Hsp90aa1|Ifng|Il1b|Klf4|Smad3|Nos2|Rock2|Sod2|Tlr2|Klrk1|Ddah1|Atp2b4	-3.041369388
BP	GO:0045428	regulation of nitric oxide biosynthetic process	19_GO:0008152 metabolic process	-5.047069475	5.608369199	15	Acp5|Gla|Ass1|Tspo|Hsp90aa1|Ifng|Il1b|Klf4|Smad3|Rock2|Sod2|Tlr2|Klrk1|Ddah1|Atp2b4	-3.020080978
BP	GO:2000379	positive regulation of reactive oxygen species metabolic process	19_GO:0048518 positive regulation of biological process	-4.995806156	5.30757024	20	Ass1|Tspo|Cdkn1a|Cxcl1|Hsp90aa1|Ifng|Il1b|Acod1|Klf4|Smad3|Pdgfb|Sod2|Tgfbr2|Thbs1|Tlr2|Klrk1|Slc5a3|Ddah1|Tmem106a|Eif5a	-2.985744938
BP	GO:0001505	regulation of neurotransmitter levels	19_GO:0065007 biological regulation	-4.796285566	4.727281834	44	Acp5|Adora2a|Adora2b|Adra2a|Gla|Ass1|Tspo|Chka|Ctbp2|Gch1|Gfap|Hsp90aa1|Ifng|Il1b|Klf4|Smad3|Mef2c|Nos2|P2ry2|Pde1b|Prkca|Rgs2|Rock2|Slc1a3|Sod2|Sphk1|Stx3|Vamp1|Tlr2|Slc7a11|Klrk1|Dpys|Sncaip|Gcsh|Ddah1|Stx11|Kmo|Kcnc4|Nr3c2|Hnmt|Tmem106a|Ppp1r9a|Atp2b4|Brsk1	-2.814638768
BP	GO:0042136	neurotransmitter biosynthetic process	19_GO:0008152 metabolic process	-4.419235907	4.917535104	18	Acp5|Gla|Ass1|Tspo|Gch1|Hsp90aa1|Ifng|Il1b|Klf4|Smad3|Nos2|Rock2|Slc1a3|Sod2|Tlr2|Klrk1|Ddah1|Atp2b4	-2.532998966
BP	GO:1904407	positive regulation of nitric oxide metabolic process	19_GO:0048518 positive regulation of biological process	-3.990106541	4.935324385	11	Ass1|Hsp90aa1|Ifng|Il1b|Klf4|Smad3|Sod2|Tlr2|Klrk1|Ddah1|Tmem106a	-2.206061927
BP	GO:1903426	regulation of reactive oxygen species biosynthetic process	19_GO:0008152 metabolic process	-3.786042828	4.411169186	17	Acp5|Gla|Arg2|Ass1|Tspo|Hsp90aa1|Ifng|Il1b|Klf4|Smad3|Rock2|Sod2|Tlr2|Klrk1|Slc5a3|Ddah1|Atp2b4	-2.061122068
BP	GO:1903409	reactive oxygen species biosynthetic process	19_GO:0008152 metabolic process	-3.42579812	4.060690008	18	Acp5|Gla|Arg2|Ass1|Tspo|Hsp90aa1|Ifng|Il1b|Klf4|Smad3|Nos2|Rock2|Sod2|Tlr2|Klrk1|Slc5a3|Ddah1|Atp2b4	-1.781093873
BP	GO:0045429	positive regulation of nitric oxide biosynthetic process	19_GO:0048518 positive regulation of biological process	-3.39663809	4.40826134	10	Ass1|Hsp90aa1|Ifng|Il1b|Klf4|Smad3|Sod2|Tlr2|Klrk1|Ddah1	-1.758773268
BP	GO:1903428	positive regulation of reactive oxygen species biosynthetic process	19_GO:0048518 positive regulation of biological process	-2.992583849	3.912465369	11	Ass1|Hsp90aa1|Ifng|Il1b|Klf4|Smad3|Sod2|Tlr2|Klrk1|Slc5a3|Ddah1	-1.440633655
BP	GO:0071887	leukocyte apoptotic process	19_GO:0009987 cellular process	-5.796455707	5.76659872	24	Adam8|Arg2|Bax|Cd24a|Cd44|Ccr7|Efna1|Fas|Ifng|Il2ra|Lgals3|Mef2c|Mertk|Mif|Aurkb|Cd27|Slc7a11|Siva1|Zc3h8|Cd274|Prelid1|Hcar2|Hsh2d|Fnip1	-3.58920001
BP	GO:2000106	regulation of leukocyte apoptotic process	19_GO:0050789 regulation of biological process	-5.238516202	5.498269016	20	Adam8|Arg2|Bax|Cd24a|Cd44|Ccr7|Efna1|Lgals3|Mef2c|Mertk|Mif|Aurkb|Cd27|Slc7a11|Zc3h8|Cd274|Prelid1|Hcar2|Hsh2d|Fnip1	-3.162176474
BP	GO:2000108	positive regulation of leukocyte apoptotic process	19_GO:0048518 positive regulation of biological process	-4.768190748	5.836658024	10	Adam8|Bax|Cd24a|Cd44|Mef2c|Zc3h8|Cd274|Prelid1|Hcar2|Fnip1	-2.80002975
BP	GO:0070227	lymphocyte apoptotic process	19_GO:0009987 cellular process	-4.594284019	5.063396414	18	Adam8|Arg2|Bax|Cd24a|Cd44|Efna1|Fas|Il2ra|Lgals3|Mif|Aurkb|Cd27|Siva1|Zc3h8|Cd274|Prelid1|Hsh2d|Fnip1	-2.662122584
BP	GO:0070228	regulation of lymphocyte apoptotic process	19_GO:0050789 regulation of biological process	-4.376321125	5.020846328	15	Adam8|Arg2|Bax|Cd24a|Cd44|Efna1|Lgals3|Mif|Aurkb|Cd27|Zc3h8|Cd274|Prelid1|Hsh2d|Fnip1	-2.496053962
BP	GO:0070230	positive regulation of lymphocyte apoptotic process	19_GO:0048518 positive regulation of biological process	-3.873097494	5.349829682	7	Adam8|Bax|Cd24a|Zc3h8|Cd274|Prelid1|Fnip1	-2.124753218
BP	GO:0070231	T cell apoptotic process	19_GO:0009987 cellular process	-3.786141116	4.655266273	12	Adam8|Arg2|Bax|Efna1|Fas|Il2ra|Lgals3|Cd27|Siva1|Zc3h8|Cd274|Prelid1	-2.061122068
BP	GO:0070232	regulation of T cell apoptotic process	19_GO:0050789 regulation of biological process	-2.493320905	3.550023198	8	Adam8|Arg2|Efna1|Lgals3|Cd27|Zc3h8|Cd274|Prelid1	-1.087200365
BP	GO:0070234	positive regulation of T cell apoptotic process	19_GO:0048518 positive regulation of biological process	-2.016158034	3.422926675	4	Adam8|Zc3h8|Cd274|Prelid1	-0.76157685
BP	GO:0032642	regulation of chemokine production	19_GO:0032501 multicellular organismal process	-5.717552721	5.919554768	19	Adora2b|Apod|Arg2|Cd24a|Csf1r|Egr1|Epha2|Ifng|Il1b|Klf4|Lpl|Mif|P2ry2|Sigirr|Tlr2|Tslp|Mefv|Il33|Tlr3	-3.522706282
BP	GO:0032602	chemokine production	19_GO:0032501 multicellular organismal process	-5.433894874	5.696814327	19	Adora2b|Apod|Arg2|Cd24a|Csf1r|Egr1|Epha2|Ifng|Il1b|Klf4|Lpl|Mif|P2ry2|Sigirr|Tlr2|Tslp|Mefv|Il33|Tlr3	-3.298947695
BP	GO:0050755	chemokine metabolic process	19_GO:0008152 metabolic process	-4.026636494	5.537731001	7	Egr1|Lilrb4a|Ifng|Il1b|Sigirr|Trem1|Tlr3	-2.233384738
BP	GO:0042108	positive regulation of cytokine biosynthetic process	19_GO:0048518 positive regulation of biological process	-3.370862864	4.471855061	9	Ccr2|Egr1|Ifng|Il1b|Thbs1|Tnfrsf8|Tlr2|Il33|Tlr3	-1.740565805
BP	GO:0032722	positive regulation of chemokine production	19_GO:0048518 positive regulation of biological process	-3.25816851	4.130814364	12	Adora2b|Csf1r|Egr1|Ifng|Il1b|Lpl|Mif|P2ry2|Tlr2|Tslp|Il33|Tlr3	-1.64743023
BP	GO:0042107	cytokine metabolic process	19_GO:0008152 metabolic process	-3.25816851	4.130814364	12	Ccr2|Egr1|Lilrb4a|Ifng|Il1b|Thbs1|Tnfrsf8|Sigirr|Tlr2|Trem1|Il33|Tlr3	-1.64743023
BP	GO:0042033	chemokine biosynthetic process	19_GO:0032501 multicellular organismal process	-2.753166891	4.314809487	5	Egr1|Ifng|Il1b|Sigirr|Tlr3	-1.268163487
BP	GO:0045073	regulation of chemokine biosynthetic process	19_GO:0032501 multicellular organismal process	-2.753166891	4.314809487	5	Egr1|Ifng|Il1b|Sigirr|Tlr3	-1.268163487
BP	GO:0042035	regulation of cytokine biosynthetic process	19_GO:0032501 multicellular organismal process	-2.612469411	3.556217558	10	Ccr2|Egr1|Ifng|Il1b|Thbs1|Tnfrsf8|Sigirr|Tlr2|Il33|Tlr3	-1.168967144
BP	GO:0150076	neuroinflammatory response	19_GO:0050896 response to stimulus	-2.609575218	3.502834717	11	Adora2a|Cst7|Ifng|Il1b|Cd200|Sphk1|Tlr2|Il33|Tlr3|Cd200r4|Smo	-1.166614803
BP	GO:0042089	cytokine biosynthetic process	19_GO:0032501 multicellular organismal process	-2.557738795	3.494981921	10	Ccr2|Egr1|Ifng|Il1b|Thbs1|Tnfrsf8|Sigirr|Tlr2|Il33|Tlr3	-1.132290487
BP	GO:0042535	positive regulation of tumor necrosis factor biosynthetic process	19_GO:0048518 positive regulation of biological process	-2.38111754	3.611451187	6	Ccr2|Ifng|Thbs1|Tnfrsf8|Tlr2|Il33	-1.017212825
BP	GO:0032635	interleukin-6 production	19_GO:0032501 multicellular organismal process	-2.323964037	3.002979106	19	Adora2b|Aqp4|Cd24a|Flt3|Ifng|Il1b|Lpl|Cd200|Nos2|Tnfsf9|Tlr2|Tslp|Il33|Prg4|Tlr3|Tmem106a|Cd300ld|Bank1|Scimp	-0.972902909
BP	GO:0061900	glial cell activation	19_GO:0050896 response to stimulus	-2.294279942	3.245711974	9	Adora2a|Cst7|Ifng|Il1b|Sphk1|Tlr2|Il33|Tlr3|Smo	-0.950605691
BP	GO:0045080	positive regulation of chemokine biosynthetic process	19_GO:0048518 positive regulation of biological process	-2.256114687	3.815331706	4	Egr1|Ifng|Il1b|Tlr3	-0.925177258
BP	GO:0060558	regulation of calcidiol 1-monooxygenase activity	19_GO:0008152 metabolic process	-2.226420272	4.158851146	3	Ifng|Il1b|Nfkb1	-0.91028977
BP	GO:0046885	regulation of hormone biosynthetic process	19_GO:0008152 metabolic process	-2.153649087	3.206272818	7	Egr1|Nr3c1|Ifng|Igf2|Il1b|Nfkb1|Stc2	-0.854056521
BP	GO:0048771	tissue remodeling	19_GO:0032501 multicellular organismal process	-5.709423514	5.53978114	30	Acp5|Acvr2b|Adam8|Angpt2|Bax|Cd24a|Cd38|Ccr2|Csf1r|Ctsk|Epha2|Gja1|Igfbp5|Lrp6|Mef2c|Mertk|Prkca|Rock2|Spp1|Tgm2|Timp1|Ubash3b|Dcstamp|Il23a|Gpnmb|Cela1|Gpr55|Tmem119|Inpp4b|Fcgr4	-3.520651223
BP	GO:0034103	regulation of tissue remodeling	19_GO:0032501 multicellular organismal process	-4.314607814	4.915157913	16	Adam8|Bax|Cd24a|Cd38|Csf1r|Gja1|Lrp6|Prkca|Rock2|Spp1|Ubash3b|Dcstamp|Gpnmb|Tmem119|Inpp4b|Fcgr4	-2.446039527
BP	GO:0046850	regulation of bone remodeling	19_GO:0032501 multicellular organismal process	-3.576529407	4.448785478	12	Adam8|Cd38|Csf1r|Gja1|Lrp6|Prkca|Spp1|Ubash3b|Dcstamp|Tmem119|Inpp4b|Fcgr4	-1.904255764
BP	GO:0046849	bone remodeling	19_GO:0032501 multicellular organismal process	-3.387340794	4.085818917	16	Acp5|Adam8|Cd38|Csf1r|Ctsk|Epha2|Gja1|Lrp6|Prkca|Spp1|Ubash3b|Dcstamp|Gpr55|Tmem119|Inpp4b|Fcgr4	-1.751854711
BP	GO:0045453	bone resorption	19_GO:0032501 multicellular organismal process	-3.23374277	4.05649333	13	Acp5|Adam8|Cd38|Csf1r|Ctsk|Lrp6|Prkca|Spp1|Ubash3b|Dcstamp|Gpr55|Tmem119|Fcgr4	-1.632012069
BP	GO:0045124	regulation of bone resorption	19_GO:0032501 multicellular organismal process	-3.03815347	4.023789759	10	Adam8|Cd38|Csf1r|Lrp6|Prkca|Spp1|Ubash3b|Dcstamp|Tmem119|Fcgr4	-1.478778906
BP	GO:0060249	anatomical structure homeostasis	19_GO:0065007 biological regulation	-2.981299644	3.418566092	40	Acp5|Adam8|Bax|Ccne1|Cd38|Cd7|Ccr2|Csf1r|Ctsk|Flt3|Gcnt2|Hsp90aa1|Napsa|Lrp6|Nek2|P2ry2|Prkca|Psen2|Rad51|Spp1|Aurkb|Tep1|Cdh23|Wrn|Map3k4|Ppp1r10|Nhp2|Prdx5|Klhl10|Ubash3b|Whrn|Dcstamp|Tex15|Gpr55|Tmem119|Smg1|Fcgr4|Slc28a2|Smo|Dna2	-1.43419422
BP	GO:0048871	multicellular organismal homeostasis	19_GO:0032501 multicellular organismal process	-2.857549733	3.284457222	47	Acp5|Acvr2b|Adam8|Fabp4|Aqp4|Bax|Cd38|Cd7|Cxcr4|Ccr2|Csf1r|Ctsk|Ddit3|Egr1|Lpin1|Flt3|Gcnt2|Gja1|Il1b|Il1rn|Napsa|Fabp5|Lcn2|Lrp6|Prkca|Prkab1|Spp1|Nr1h3|Cdh23|Gadd45g|Lsr|Prdx5|Klhl10|Ubash3b|Whrn|Dcstamp|Tex15|Ffar4|Metrnl|Plcl2|Plcl1|Gpr55|Plac8|Tmem119|Fcgr4|Slc28a2|Smo	-1.341644644
BP	GO:0034105	positive regulation of tissue remodeling	19_GO:0048518 positive regulation of biological process	-2.701020346	3.79915602	8	Adam8|Bax|Lrp6|Prkca|Rock2|Spp1|Dcstamp|Fcgr4	-1.238114333
BP	GO:0001894	tissue homeostasis	19_GO:0032501 multicellular organismal process	-2.577350163	3.16662684	26	Acp5|Adam8|Bax|Cd38|Cd7|Ccr2|Csf1r|Ctsk|Flt3|Gcnt2|Napsa|Lrp6|Prkca|Spp1|Cdh23|Prdx5|Klhl10|Ubash3b|Whrn|Dcstamp|Tex15|Gpr55|Tmem119|Fcgr4|Slc28a2|Smo	-1.143603724
BP	GO:0045780	positive regulation of bone resorption	19_GO:0048518 positive regulation of biological process	-2.38111754	3.611451187	6	Adam8|Lrp6|Prkca|Spp1|Dcstamp|Fcgr4	-1.017212825
BP	GO:0046852	positive regulation of bone remodeling	19_GO:0048518 positive regulation of biological process	-2.38111754	3.611451187	6	Adam8|Lrp6|Prkca|Spp1|Dcstamp|Fcgr4	-1.017212825
BP	GO:0001906	cell killing	19_GO:0001906 cell killing	-5.663504642	5.508288485	30	Cd5l|Arg1|Cfh|Dnase1l3|Cxcl1|Gzmb|H2-T10|H2-T22|Cxcl10|Ifng|Igf2|Lag3|Lgals3|Ltf|Nos2|Prdx1|Cxcl2|Tap1|Pglyrp1|Sh2d1b1|Klrk1|Raet1d|Cxcl14|Trem1|Stx11|Klrb1b|Il23a|Clec2d|Klre1|Gm11127	-3.486544566
BP	GO:0031341	regulation of cell killing	19_GO:0001906 cell killing	-3.849159251	4.40212593	19	Cd5l|Arg1|Cfh|Dnase1l3|Cxcl1|H2-T10|H2-T22|Ifng|Igf2|Lag3|Nos2|Tap1|Sh2d1b1|Klrk1|Klrb1b|Il23a|Clec2d|Klre1|Gm11127	-2.110550502
BP	GO:0002228	natural killer cell mediated immunity	19_GO:0002376 immune system process	-3.714589537	4.585011403	12	Igf2|Klrd1|Lag3|Prdx1|Tap1|Sh2d1b1|Klrk1|Raet1d|Stx11|Klrb1b|Clec2d|Klre1	-2.007095642
BP	GO:0001909	leukocyte mediated cytotoxicity	19_GO:0001906 cell killing	-3.65005356	4.205249674	20	Arg1|Dnase1l3|Cxcl1|Gzmb|H2-T10|H2-T22|Igf2|Lag3|Prdx1|Tap1|Sh2d1b1|Klrk1|Raet1d|Trem1|Stx11|Klrb1b|Il23a|Clec2d|Klre1|Gm11127	-1.962834977
BP	GO:0042267	natural killer cell mediated cytotoxicity	19_GO:0001906 cell killing	-3.307993494	4.241462845	11	Igf2|Lag3|Prdx1|Tap1|Sh2d1b1|Klrk1|Raet1d|Stx11|Klrb1b|Clec2d|Klre1	-1.686770344
BP	GO:0045953	negative regulation of natural killer cell mediated cytotoxicity	19_GO:0001906 cell killing	-3.243576526	4.763270211	6	Igf2|Tap1|Sh2d1b1|Klrb1b|Clec2d|Klre1	-1.639166875
BP	GO:0002716	negative regulation of natural killer cell mediated immunity	19_GO:0002376 immune system process	-3.110694138	4.586854216	6	Igf2|Tap1|Sh2d1b1|Klrb1b|Clec2d|Klre1	-1.539728987
BP	GO:0050777	negative regulation of immune response	19_GO:0002376 immune system process	-3.00289096	3.634869677	20	Arg1|Arg2|Ccr1|Ccr2|Fgl2|Igf2|Il2ra|Acod1|Lgals3|Smad7|Psmb4|Tap1|Pglyrp1|Sh2d1b1|Vsir|Il33|Klrb1b|Clec2d|Klre1|Fcrlb	-1.449546562
BP	GO:0001910	regulation of leukocyte mediated cytotoxicity	19_GO:0001906 cell killing	-2.915423873	3.669960824	15	Arg1|Dnase1l3|Cxcl1|H2-T10|H2-T22|Igf2|Lag3|Tap1|Sh2d1b1|Klrk1|Klrb1b|Il23a|Clec2d|Klre1|Gm11127	-1.380533787
BP	GO:0002707	negative regulation of lymphocyte mediated immunity	19_GO:0002376 immune system process	-2.903425441	3.949259401	9	Arg1|Igf2|Smad7|Tap1|Sh2d1b1|Vsir|Klrb1b|Clec2d|Klre1	-1.372531958
BP	GO:0002704	negative regulation of leukocyte mediated immunity	19_GO:0002376 immune system process	-2.845997443	3.814468233	10	Arg1|Ccr2|Igf2|Smad7|Tap1|Sh2d1b1|Vsir|Klrb1b|Clec2d|Klre1	-1.334944535
BP	GO:0001911	negative regulation of leukocyte mediated cytotoxicity	19_GO:0001906 cell killing	-2.760875968	4.121126695	6	Igf2|Tap1|Sh2d1b1|Klrb1b|Clec2d|Klre1	-1.270470075
BP	GO:0002698	negative regulation of immune effector process	19_GO:0002376 immune system process	-2.648843147	3.359460971	17	Arg1|Ccr2|Fgl2|Igf2|Il2ra|Lgals3|Smad7|Tap1|Pglyrp1|Vpreb3|Sh2d1b1|Htra1|Vsir|Il33|Klrb1b|Clec2d|Klre1	-1.196024427
BP	GO:0031343	positive regulation of cell killing	19_GO:0001906 cell killing	-2.434256691	3.240209699	13	Cd5l|Arg1|Cxcl1|H2-T10|H2-T22|Ifng|Lag3|Nos2|Sh2d1b1|Klrk1|Il23a|Klre1|Gm11127	-1.047116747
BP	GO:0042269	regulation of natural killer cell mediated cytotoxicity	19_GO:0001906 cell killing	-2.428709397	3.471812186	8	Igf2|Lag3|Tap1|Sh2d1b1|Klrk1|Klrb1b|Clec2d|Klre1	-1.042995708
BP	GO:0031342	negative regulation of cell killing	19_GO:0001906 cell killing	-2.38111754	3.611451187	6	Igf2|Tap1|Sh2d1b1|Klrb1b|Clec2d|Klre1	-1.017212825
BP	GO:0002715	regulation of natural killer cell mediated immunity	19_GO:0002376 immune system process	-2.305737904	3.321872572	8	Igf2|Lag3|Tap1|Sh2d1b1|Klrk1|Klrb1b|Clec2d|Klre1	-0.958603121
BP	GO:0045824	negative regulation of innate immune response	19_GO:0002376 immune system process	-2.048038537	2.94996718	9	Arg1|Ccr1|Igf2|Acod1|Tap1|Sh2d1b1|Klrb1b|Clec2d|Klre1	-0.777908081
MF	GO:0019887	protein kinase regulator activity		-5.642063765	5.565671813	27	Ccna2|Ccnb2|Ccne1|Ccnf|Cd24a|Cdk5r1|Cdkn1a|Cdkn1c|Cdkn2c|Cdkn2d|Erbb3|Rack1|Igf2|Ltf|Nos2|Pim1|Cks1b|Chp1|Rgcc|Etaa1|Tpx2|Kidins220|Hexim1|Fam20a|Trib3|Gprc5a|Ccnb1	-3.471020241
MF	GO:0019207	kinase regulator activity		-5.572800351	5.445872575	30	Ccna2|Ccnb2|Ccne1|Ccnf|Cd24a|Cdk5r1|Cdkn1a|Cdkn1c|Cdkn2c|Cdkn2d|Erbb3|Rack1|Igf2|Klf4|Lrp6|Ltf|Nos2|Pik3r1|Pim1|Cks1b|Chp1|Rgcc|Etaa1|Tpx2|Kidins220|Hexim1|Fam20a|Trib3|Gprc5a|Ccnb1	-3.413186288
BP	GO:0000079	regulation of cyclin-dependent protein serine/threonine kinase activity	19_GO:0008152 metabolic process	-5.151681095	5.632140046	16	Ccna2|Ccnb2|Ccne1|Ccnf|Cdkn1a|Cdkn1c|Cdkn2c|Cdkn2d|Pdgfb|Pim1|Plk1|Prox1|Cks1b|Rgcc|Hexim1|Ccnb1	-3.098349782
MF	GO:0016538	cyclin-dependent protein serine/threonine kinase regulator activity		-4.906462927	5.7326882	12	Ccna2|Ccnb2|Ccne1|Ccnf|Cdk5r1|Cdkn1a|Cdkn1c|Cdkn2c|Cdkn2d|Cks1b|Hexim1|Ccnb1	-2.907633007
BP	GO:1904029	regulation of cyclin-dependent protein kinase activity	19_GO:0008152 metabolic process	-4.852050561	5.378062814	16	Ccna2|Ccnb2|Ccne1|Ccnf|Cdkn1a|Cdkn1c|Cdkn2c|Cdkn2d|Pdgfb|Pim1|Plk1|Prox1|Cks1b|Rgcc|Hexim1|Ccnb1	-2.859024217
MF	GO:0030295	protein kinase activator activity		-3.494131095	4.262914773	14	Cd24a|Cdk5r1|Cdkn1a|Erbb3|Igf2|Ltf|Pim1|Cks1b|Rgcc|Etaa1|Tpx2|Fam20a|Gprc5a|Ccnb1	-1.836305171
MF	GO:0019209	kinase activator activity		-3.126555944	3.909636492	14	Cd24a|Cdk5r1|Cdkn1a|Erbb3|Igf2|Ltf|Pim1|Cks1b|Rgcc|Etaa1|Tpx2|Fam20a|Gprc5a|Ccnb1	-1.548007234
CC	GO:0000307	cyclin-dependent protein kinase holoenzyme complex		-3.125465687	4.198879204	9	Ccna2|Ccnb2|Ccne1|Ccnf|Cdk1|Cdkn1a|Cdkn2d|Cks1b|Ccnb1	-1.548007234
CC	GO:1902554	serine/threonine protein kinase complex		-2.97167221	3.795430165	13	Acvr2b|Ccna2|Ccnb2|Ccne1|Ccnf|Cdk1|Cdk5r1|Cdkn1a|Cdkn2d|Tgfbr1|Cks1b|Tbc1d5|Ccnb1	-1.425941137
CC	GO:1902911	protein kinase complex		-2.715780969	3.501866787	14	Acvr2b|Ccna2|Ccnb2|Ccne1|Ccnf|Cdk1|Cdk5r1|Cdkn1a|Cdkn2d|Prkab1|Tgfbr1|Cks1b|Tbc1d5|Ccnb1	-1.247742066
BP	GO:0050817	coagulation	19_GO:0032501 multicellular organismal process	-5.642063765	5.565671813	27	Adra2a|Anxa5|Anxa8|Anxa2|Entpd1|Cfh|Dmtn|F10|F7|Fn1|Pdpn|Lilrb4a|Hpse|Mertk|Pdgfb|Prkca|Psen2|S100a9|Thbs1|Vwf|Papss2|Slc7a11|Gp9|P2ry12|Ubash3b|Rap2b|Hps4	-3.471020241
BP	GO:0007596	blood coagulation	19_GO:0032501 multicellular organismal process	-5.29407801	5.343043758	26	Adra2a|Anxa5|Anxa8|Anxa2|Entpd1|Cfh|Dmtn|F10|F7|Fn1|Pdpn|Lilrb4a|Hpse|Mertk|Pdgfb|Prkca|S100a9|Thbs1|Vwf|Papss2|Slc7a11|Gp9|P2ry12|Ubash3b|Rap2b|Hps4	-3.192455895
BP	GO:0007599	hemostasis	19_GO:0065007 biological regulation	-5.197617929	5.272979833	26	Adra2a|Anxa5|Anxa8|Anxa2|Entpd1|Cfh|Dmtn|F10|F7|Fn1|Pdpn|Lilrb4a|Hpse|Mertk|Pdgfb|Prkca|S100a9|Thbs1|Vwf|Papss2|Slc7a11|Gp9|P2ry12|Ubash3b|Rap2b|Hps4	-3.131516513
BP	GO:0009611	response to wounding	19_GO:0050896 response to stimulus	-5.005794688	4.770262213	57	Macf1|Adra2a|Anxa5|Anxa8|Bax|Anxa2|Capn3|Cd24a|Entpd1|Cd44|Cdkn1a|Cfh|Cxcr4|Ccr2|Dhfr|Eng|Dmtn|F10|F7|Fn1|Gfap|Gja1|Pdpn|Lilrb4a|Hbegf|Hpse|Klf4|Smad3|Mertk|Mif|Ninj1|Pdgfb|Pkm|Prkca|S100a9|Slc1a3|Sod2|Aurka|Sdc1|Thbs1|Timp1|Vwf|Papss2|Slc7a11|Gp9|Smoc2|P2ry12|Flrt3|Ubash3b|Rap2b|Hopx|Clasp2|Hps4|Myof|Ajap1|Rtn4rl1|Mirt1	-2.989073678
BP	GO:0042060	wound healing	19_GO:0050896 response to stimulus	-4.825757557	4.738365114	45	Macf1|Adra2a|Anxa5|Anxa8|Anxa2|Capn3|Entpd1|Cd44|Cdkn1a|Cfh|Cxcr4|Ccr2|Eng|Dmtn|F10|F7|Fn1|Gja1|Pdpn|Lilrb4a|Hbegf|Hpse|Smad3|Mertk|Ninj1|Pdgfb|Pkm|Prkca|S100a9|Sdc1|Thbs1|Timp1|Vwf|Papss2|Slc7a11|Gp9|Smoc2|P2ry12|Ubash3b|Rap2b|Hopx|Clasp2|Hps4|Myof|Ajap1	-2.838458257
BP	GO:0050878	regulation of body fluid levels	19_GO:0065007 biological regulation	-4.203516309	4.351570356	40	Adora2a|Adra2a|Anxa5|Anxa8|Aprt|Aqp4|Anxa2|Entpd1|Cfh|Dmtn|F10|F7|Fn1|Gja1|Pdpn|Lilrb4a|Hpse|Kcnn4|Mertk|Neurl1a|Nme1|Oprl1|P2ry2|Pdgfb|Prkca|S100a9|Sct|Thbs1|Nr1h3|Usf2|Vwf|Aplnr|Papss2|Slc7a11|Lsr|Gp9|P2ry12|Ubash3b|Rap2b|Hps4	-2.364237398
BP	GO:1903034	regulation of response to wounding	19_GO:0050896 response to stimulus	-3.985099958	4.357360026	26	Adra2a|Anxa5|Anxa2|Capn3|Cd24a|Cdkn1a|Cxcr4|Dmtn|F7|Gja1|Pdpn|Hbegf|Hpse|Klf4|Smad3|Mif|Pdgfb|Prkca|S100a9|Thbs1|Smoc2|Ubash3b|Hopx|Clasp2|Ajap1|Rtn4rl1	-2.203812994
BP	GO:0061041	regulation of wound healing	19_GO:0050896 response to stimulus	-3.834434431	4.313767921	22	Adra2a|Anxa5|Anxa2|Capn3|Cdkn1a|Cxcr4|Dmtn|F7|Gja1|Pdpn|Hbegf|Hpse|Smad3|Pdgfb|Prkca|S100a9|Thbs1|Smoc2|Ubash3b|Hopx|Clasp2|Ajap1	-2.097959811
BP	GO:0030168	platelet activation	19_GO:0032501 multicellular organismal process	-3.43871142	4.210238852	14	Adra2a|Entpd1|Cfh|Dmtn|Fn1|Pdpn|Mertk|Pdgfb|Prkca|Vwf|Slc7a11|P2ry12|Ubash3b|Rap2b	-1.792280354
BP	GO:1903036	positive regulation of response to wounding	19_GO:0048518 positive regulation of biological process	-3.43871142	4.210238852	14	Adra2a|Capn3|Cd24a|Cxcr4|Dmtn|F7|Pdpn|Hbegf|Hpse|Mif|S100a9|Thbs1|Smoc2|Hopx	-1.792280354
BP	GO:0090303	positive regulation of wound healing	19_GO:0048518 positive regulation of biological process	-3.381180573	4.254366054	12	Adra2a|Capn3|Cxcr4|Dmtn|F7|Pdpn|Hbegf|Hpse|S100a9|Thbs1|Smoc2|Hopx	-1.74837555
BP	GO:0050820	positive regulation of coagulation	19_GO:0048518 positive regulation of biological process	-2.831838572	4.065940868	7	Dmtn|F7|Pdpn|Hpse|Psen2|S100a9|Thbs1	-1.32355288
BP	GO:0034109	homotypic cell-cell adhesion	19_GO:0022610 biological adhesion	-2.816368107	3.678316535	12	Cd24a|Cfh|Dmtn|Fn1|Pdpn|Jup|Lgals1|Prkca|Slc7a11|P2ry12|Ubash3b|Rap2b	-1.313088746
BP	GO:0070527	platelet aggregation	19_GO:0022610 biological adhesion	-2.701453717	3.719479897	9	Cfh|Dmtn|Fn1|Pdpn|Prkca|Slc7a11|P2ry12|Ubash3b|Rap2b	-1.238114333
BP	GO:0030194	positive regulation of blood coagulation	19_GO:0048518 positive regulation of biological process	-2.38111754	3.611451187	6	Dmtn|F7|Pdpn|Hpse|S100a9|Thbs1	-1.017212825
BP	GO:1900048	positive regulation of hemostasis	19_GO:0048518 positive regulation of biological process	-2.38111754	3.611451187	6	Dmtn|F7|Pdpn|Hpse|S100a9|Thbs1	-1.017212825
BP	GO:0050818	regulation of coagulation	19_GO:0032501 multicellular organismal process	-2.357042881	3.18859247	12	Anxa5|Anxa2|Dmtn|F7|Pdpn|Hpse|Pdgfb|Prkca|Psen2|S100a9|Thbs1|Ubash3b	-0.998020939
BP	GO:0030193	regulation of blood coagulation	19_GO:0032501 multicellular organismal process	-2.076022368	2.905438516	11	Anxa5|Anxa2|Dmtn|F7|Pdpn|Hpse|Pdgfb|Prkca|S100a9|Thbs1|Ubash3b	-0.801137483
BP	GO:1900046	regulation of hemostasis	19_GO:0050789 regulation of biological process	-2.037297495	2.860460951	11	Anxa5|Anxa2|Dmtn|F7|Pdpn|Hpse|Pdgfb|Prkca|S100a9|Thbs1|Ubash3b	-0.774023513
BP	GO:1905954	positive regulation of lipid localization	19_GO:0051179 localization	-5.628897737	5.801257567	20	Apoc4|Plin2|Anxa2|Ehd1|Fabp3|Il1b|Lpl|Mif|P2ry2|Abcb4|Msr1|Spp1|Scarb1|Nr1h3|Atp8a2|Ikbke|Ptges|Prelid1|Hilpda|Cyp4f18	-3.460739902
BP	GO:0010876	lipid localization	19_GO:0051179 localization	-4.310122314	4.394569289	44	Apoc4|Plin2|Fabp4|Apoc1|Apoc2|Apod|Tspo|Anxa2|Ehd1|Fabp3|Fzd4|Il1b|Kcnn4|Fabp5|Lpl|Lrp6|Mif|Nos2|P2ry2|Abcb4|Abcb1a|Pla2g2d|Msr1|Soat1|Spp1|Sqle|Scarb1|Thbs1|Nr1h3|Atp8a2|Ikbke|Aqp9|Ptges|Prelid1|Hilpda|Pitpnc1|Cyp4f18|Stra6l|Slco2b1|Abca9|Soat2|Ano3|Nrip1|Ano7	-2.444165348
BP	GO:1905952	regulation of lipid localization	19_GO:0051179 localization	-4.070152048	4.483571426	23	Apoc4|Plin2|Apoc1|Apoc2|Anxa2|Ehd1|Fabp3|Il1b|Lpl|Mif|P2ry2|Abcb4|Msr1|Spp1|Scarb1|Thbs1|Nr1h3|Atp8a2|Ikbke|Ptges|Prelid1|Hilpda|Cyp4f18	-2.262093364
BP	GO:0044070	regulation of anion transport	19_GO:0051179 localization	-4.002551805	4.502987579	20	Adora2a|Arg1|Arg2|Fabp3|Nr3c1|Il1b|Il1rn|Mif|P2ry2|Abcb4|Abcb1a|Prkca|Rgs2|Stc2|Thbs1|Atp8a2|Ptges|Prelid1|Cyp4f18|Kmo	-2.215323647
BP	GO:0006869	lipid transport	19_GO:0051179 localization	-3.691314195	3.991078742	38	Apoc4|Plin2|Fabp4|Apoc1|Apoc2|Apod|Tspo|Anxa2|Fabp3|Fzd4|Il1b|Kcnn4|Fabp5|Lrp6|Mif|Nos2|P2ry2|Abcb4|Abcb1a|Pla2g2d|Msr1|Soat1|Spp1|Scarb1|Thbs1|Nr1h3|Atp8a2|Aqp9|Ptges|Prelid1|Pitpnc1|Cyp4f18|Stra6l|Slco2b1|Abca9|Soat2|Ano3|Ano7	-1.992539423
BP	GO:1903793	positive regulation of anion transport	19_GO:0051179 localization	-3.523072282	4.339141305	13	Adora2a|Fabp3|Nr3c1|Il1b|Mif|P2ry2|Abcb4|Abcb1a|Atp8a2|Ptges|Prelid1|Cyp4f18|Kmo	-1.858984537
BP	GO:0032890	regulation of organic acid transport	19_GO:0051179 localization	-3.077701698	3.86192933	14	Adora2a|Arg1|Arg2|Fabp3|Nr3c1|Il1b|Il1rn|Mif|P2ry2|Rgs2|Thbs1|Ptges|Cyp4f18|Kmo	-1.510884227
BP	GO:0006820	anion transport	19_GO:0051179 localization	-2.87335921	3.275928557	53	Plin2|Adora2a|Fabp4|Apoc2|Arg1|Arg2|Tspo|Emb|Fabp3|Gja1|Glrb|Pdpn|Nr3c1|Il1b|Il1rn|Kcnn4|Fabp5|Mif|Nos2|P2ry2|Abcb4|Abcb1a|Prkca|Pla2g2d|Rgs2|Slc1a3|Scarb1|Stc2|Thbs1|Trpc4|Slc7a11|Racgap1|Clic4|Atp8a2|Aqp9|Ptges|Prelid1|Pacc1|Pitpnc1|Cyp4f18|Stra6l|Slc16a3|Kmo|Lrrc8c|Slco2b1|Slc16a6|Slc12a6|Slc38a5|Ano3|Slc4a11|Slc26a9|Ano8|Ano7	-1.352259577
BP	GO:0015718	monocarboxylic acid transport	19_GO:0051179 localization	-2.856678833	3.484187963	21	Plin2|Fabp4|Emb|Fabp3|Il1b|Fabp5|Mif|Nos2|P2ry2|Abcb4|Pla2g2d|Thbs1|Trpc4|Aqp9|Ptges|Cyp4f18|Stra6l|Slc16a3|Slco2b1|Slc16a6|Slc38a5	-1.341413825
BP	GO:0046717	acid secretion	19_GO:0051179 localization	-2.791925274	3.498390395	17	Adora2a|Gja1|Nr3c1|Il1b|Il1rn|Mif|Nos2|Oprl1|P2ry2|Abcb4|Pla2g2d|Sct|Trpc4|Aqp9|Ptges|Cyp4f18|Kmo	-1.292979608
BP	GO:0015711	organic anion transport	19_GO:0051179 localization	-2.634264407	3.116885282	42	Plin2|Adora2a|Fabp4|Apoc2|Arg1|Arg2|Emb|Fabp3|Gja1|Pdpn|Nr3c1|Il1b|Il1rn|Kcnn4|Fabp5|Mif|Nos2|P2ry2|Abcb4|Abcb1a|Pla2g2d|Rgs2|Slc1a3|Scarb1|Thbs1|Trpc4|Slc7a11|Atp8a2|Aqp9|Ptges|Prelid1|Pitpnc1|Cyp4f18|Stra6l|Slc16a3|Kmo|Lrrc8c|Slco2b1|Slc16a6|Slc38a5|Slc4a11|Slc26a9	-1.182552171
BP	GO:0032370	positive regulation of lipid transport	19_GO:0051179 localization	-2.575338672	3.424273034	12	Anxa2|Fabp3|Il1b|Mif|P2ry2|Abcb4|Spp1|Nr1h3|Atp8a2|Ptges|Prelid1|Cyp4f18	-1.143603724
BP	GO:2000193	positive regulation of fatty acid transport	19_GO:0051179 localization	-2.560536298	3.852992874	6	Fabp3|Il1b|Mif|P2ry2|Ptges|Cyp4f18	-1.132290487
BP	GO:0046942	carboxylic acid transport	19_GO:0051179 localization	-2.51710928	3.059041727	33	Plin2|Adora2a|Fabp4|Arg1|Arg2|Emb|Fabp3|Gja1|Pdpn|Nr3c1|Il1b|Il1rn|Fabp5|Mif|Nos2|P2ry2|Abcb4|Pla2g2d|Rgs2|Slc1a3|Thbs1|Trpc4|Slc7a11|Aqp9|Ptges|Cyp4f18|Stra6l|Slc16a3|Kmo|Lrrc8c|Slco2b1|Slc16a6|Slc38a5	-1.102753563
BP	GO:0015849	organic acid transport	19_GO:0051179 localization	-2.477189451	3.022842967	33	Plin2|Adora2a|Fabp4|Arg1|Arg2|Emb|Fabp3|Gja1|Pdpn|Nr3c1|Il1b|Il1rn|Fabp5|Mif|Nos2|P2ry2|Abcb4|Pla2g2d|Rgs2|Slc1a3|Thbs1|Trpc4|Slc7a11|Aqp9|Ptges|Cyp4f18|Stra6l|Slc16a3|Kmo|Lrrc8c|Slco2b1|Slc16a6|Slc38a5	-1.07453734
BP	GO:2000191	regulation of fatty acid transport	19_GO:0051179 localization	-2.352602959	3.462041005	7	Fabp3|Il1b|Mif|P2ry2|Thbs1|Ptges|Cyp4f18	-0.996250868
BP	GO:0032892	positive regulation of organic acid transport	19_GO:0051179 localization	-2.34763004	3.308755657	9	Adora2a|Fabp3|Nr3c1|Il1b|Mif|P2ry2|Ptges|Cyp4f18|Kmo	-0.993048775
BP	GO:0032310	prostaglandin secretion	19_GO:0051179 localization	-2.288261013	3.635977431	5	Il1b|Mif|Nos2|P2ry2|Ptges	-0.949300414
BP	GO:0032305	positive regulation of icosanoid secretion	19_GO:0051179 localization	-2.191384679	3.493863051	5	Il1b|Mif|P2ry2|Ptges|Cyp4f18	-0.885642581
BP	GO:0032368	regulation of lipid transport	19_GO:0051179 localization	-2.083606922	2.816050208	15	Apoc1|Apoc2|Anxa2|Fabp3|Il1b|Mif|P2ry2|Abcb4|Spp1|Thbs1|Nr1h3|Atp8a2|Ptges|Prelid1|Cyp4f18	-0.80761743
BP	GO:0032308	positive regulation of prostaglandin secretion	19_GO:0051179 localization	-2.016158034	3.422926675	4	Il1b|Mif|P2ry2|Ptges	-0.76157685
BP	GO:0015908	fatty acid transport	19_GO:0051179 localization	-2.012741453	2.803118701	12	Plin2|Fabp4|Fabp3|Il1b|Fabp5|Mif|Nos2|P2ry2|Pla2g2d|Thbs1|Ptges|Cyp4f18	-0.759378452
BP	GO:0097237	cellular response to toxic substance	19_GO:0050896 response to stimulus	-5.592029257	5.530315115	27	Abl1|Prdx6|Rhob|Dhfr|Ect2|Egr1|Esd|Fxn|Gch1|Rack1|Itpr2|Lcn2|Nfkb1|Prdx1|Pdgfb|Pim1|Ccl7|Sod2|Sphk1|Timeless|Txn1|Net1|Akr1a1|Glrx|Abtb2|Gpr37l1|Ppp1r9a	-3.429585905
BP	GO:0009636	response to toxic substance	19_GO:0050896 response to stimulus	-4.59858618	4.62956073	40	Abl1|Adora2a|Prdx6|Rhob|Ass1|Bax|Cdk1|Dhfr|Ect2|Egr1|Esd|Fas|Fxn|Gch1|Rack1|Gucy2c|Hpgd|Igf2|Itpr2|Lck|Lcn2|Nfkb1|Prdx1|Pde1b|Pdgfb|Pim1|Prkca|Ccl7|Sod2|Sphk1|Timeless|Txn1|Slc7a11|Net1|Akr1a1|Glrx|Abtb2|Gpr37l1|Ppp1r9a|Kdm3b	-2.664751161
BP	GO:0035690	cellular response to drug	19_GO:0050896 response to stimulus	-3.862630086	4.088917414	42	Abl1|Rhob|Cd69|Cdk5r1|Ect2|Egr1|Eif4ebp1|Fxn|Rack1|Gpld1|Nr3c1|Il1b|Acod1|Itpr2|Jup|Lcn2|Ly6c1|Mef2c|Nfkb1|Nos2|Pdgfb|Rad51|Rock2|Ryr1|Ccl7|Sphk1|Thbs1|Timeless|Txn1|Vim|Map4k1|Net1|Ly6i|Rnf149|P2ry12|Glrx|Ly6a|Gpr37l1|Pde2a|Trim41|Atp2b4|Ly6c2	-2.118903986
BP	GO:0006979	response to oxidative stress	19_GO:0050896 response to stimulus	-2.437375313	2.960817131	38	Abl1|Prdx6|Apod|Rhob|Cd38|Ccr7|Coq7|Cst3|Dhfr|Ect2|Fxn|Gch1|Rack1|Gsr|Lck|Lcn2|Melk|Nfkb1|Prdx1|Prkca|Psmb5|Sod2|Sphk1|Stc2|Thbs1|Txn1|Wrn|Slc7a11|Prdx4|Prdx5|Net1|Gpx7|Aifm2|Sfpq|Srxn1|Glrx|Gpr37l1|Ggt7	-1.048804413
BP	GO:0000302	response to reactive oxygen species	19_GO:0050896 response to stimulus	-2.401528816	3.041585077	22	Abl1|Prdx6|Apod|Rhob|Ccr7|Dhfr|Ect2|Fxn|Gch1|Rack1|Lck|Lcn2|Prdx1|Prkca|Sod2|Sphk1|Thbs1|Txn1|Prdx5|Net1|Glrx|Gpr37l1	-1.021473767
BP	GO:0034614	cellular response to reactive oxygen species	19_GO:0050896 response to stimulus	-2.145604806	2.848736723	17	Abl1|Rhob|Dhfr|Ect2|Fxn|Gch1|Rack1|Lcn2|Prdx1|Sod2|Sphk1|Thbs1|Txn1|Prdx5|Net1|Glrx|Gpr37l1	-0.848871376
BP	GO:0010035	response to inorganic substance	19_GO:0050896 response to stimulus	-2.08664917	2.61626137	43	Abl1|Anxa5|Fabp4|Rhob|Ass1|Capn3|Ccr7|Cp|Crip1|Dhfr|Ect2|Dmtn|Fas|Fn1|Fosb|Fxn|Gch1|Rack1|Gpld1|Lck|Lcn2|Mef2c|Prdx1|Ppp1ca|Rad51|Selenow|Slc1a3|Sod2|Sphk1|Thbs1|Timeless|Trpc3|Txn1|Clic4|Net1|Kcnip3|Kcnmb4|Aqp9|Glrx|Gpr37l1|Gsn|Tigar|Atp2b4	-0.809921708
BP	GO:0019221	cytokine-mediated signaling pathway	19_GO:0023052 signaling	-5.507641284	5.182244643	45	Arg1|Cd24a|Cxcr4|Ccr1|Ccr2|Csf1r|Ecm1|Egr1|Flt3|Cxcl1|Cxcl10|Ifng|Il1b|Il1r2|Il1rn|Il2rb|Il2rg|Il3ra|Kit|Osm|Pdgfb|Padi2|Pirb|Ccl6|Ccl7|Ccl9|Cxcl2|Sphk1|Traf1|Traf5|Sigirr|Tslp|Irf7|Cxcl11|Ikbke|Zbp1|Gpr35|Ifitm3|Ifitm1|Il33|Ifitm2|Peli3|Cd300lf|Cxcl3|Gm13283	-3.361903626
BP	GO:0060759	regulation of response to cytokine stimulus	19_GO:0050896 response to stimulus	-3.2276055	3.908309486	17	Arg1|Cd24a|Cxcr4|Ecm1|Il1r2|Il1rn|Klf4|Padi2|Sphk1|Sigirr|Tlr2|Tslp|Irf7|Ikbke|Zbp1|Peli3|Cd300lf	-1.628658744
BP	GO:0001959	regulation of cytokine-mediated signaling pathway	19_GO:0023052 signaling	-2.749259198	3.506322156	15	Arg1|Cd24a|Cxcr4|Ecm1|Il1r2|Il1rn|Padi2|Sphk1|Sigirr|Tslp|Irf7|Ikbke|Zbp1|Peli3|Cd300lf	-1.264851943
BP	GO:0032649	regulation of interferon-gamma production	19_GO:0032501 multicellular organismal process	-5.499842394	5.658661543	21	Abl1|Cd2|Ccr2|Ccr7|Ddit3|Flt3|Il1b|Cd244a|Cd27|Pglyrp1|Tnfsf9|Sh2d1b1|Klrk1|Pdcd1lg2|Cd274|Vsir|Il33|Il23a|Tlr3|Klre1|Isg15	-3.356827594
BP	GO:0032609	interferon-gamma production	19_GO:0032501 multicellular organismal process	-5.224043258	5.410939557	22	Abl1|Cd2|Ccr2|Ccr7|Ddit3|Flt3|Il1b|Cd244a|Cd27|Pglyrp1|Tnfsf9|Gadd45g|Sh2d1b1|Klrk1|Pdcd1lg2|Cd274|Vsir|Il33|Il23a|Tlr3|Klre1|Isg15	-3.151066325
BP	GO:0032729	positive regulation of interferon-gamma production	19_GO:0048518 positive regulation of biological process	-2.62162608	3.473525238	12	Abl1|Cd2|Ccr2|Flt3|Il1b|Cd244a|Cd27|Tnfsf9|Klrk1|Il23a|Tlr3|Klre1	-1.175404365
BP	GO:0050731	positive regulation of peptidyl-tyrosine phosphorylation	19_GO:0048518 positive regulation of biological process	-5.420790678	5.361873775	29	Abl1|Adra2a|Areg|Ctnnd1|Cd24a|Cd44|Csf1r|Csf3|Efna1|Erbb3|Hbegf|Hes1|Ifng|Igf2|Itga5|Kit|Lck|Mif|Neurl1a|Osm|Pdgfb|Tnfrsf18|Cd40|Yes1|Sh2d1b1|Tslp|Il23a|Rasa1|Bank1	-3.291139839
BP	GO:0050730	regulation of peptidyl-tyrosine phosphorylation	19_GO:0008152 metabolic process	-5.274519541	5.152508812	35	Abl1|Adra2a|Areg|Bst1|Ctnnd1|Cd24a|Cd44|Csf1r|Csf3|Efna1|Dmtn|Erbb3|Hbegf|Hes1|Ifng|Igf2|Itga5|Kit|Lck|Mif|Neurl1a|Osm|Pdgfb|Prkca|Psen2|Tnfrsf18|Cd40|Yes1|Sh2d1b1|Tslp|Rap2b|Il23a|Rasa1|Gprc5a|Bank1	-3.177804761
BP	GO:0018108	peptidyl-tyrosine phosphorylation	19_GO:0008152 metabolic process	-4.428298621	4.530276048	38	Abl1|Adra2a|Areg|Bst1|Ctnnd1|Cd24a|Cd44|Csf1r|Csf3|Efna1|Dmtn|Erbb3|Fgr|Hbegf|Hes1|Ifng|Igf2|Itga5|Kit|Lck|Mif|Neurl1a|Osm|Pdgfb|Prkca|Psen2|Tnfrsf18|Cd40|Ttk|Yes1|Sh2d1b1|Tslp|Rap2b|Il23a|Pkdcc|Rasa1|Gprc5a|Bank1	-2.539045735
BP	GO:0018212	peptidyl-tyrosine modification	19_GO:0008152 metabolic process	-4.340435614	4.467851805	38	Abl1|Adra2a|Areg|Bst1|Ctnnd1|Cd24a|Cd44|Csf1r|Csf3|Efna1|Dmtn|Erbb3|Fgr|Hbegf|Hes1|Ifng|Igf2|Itga5|Kit|Lck|Mif|Neurl1a|Osm|Pdgfb|Prkca|Psen2|Tnfrsf18|Cd40|Ttk|Yes1|Sh2d1b1|Tslp|Rap2b|Il23a|Pkdcc|Rasa1|Gprc5a|Bank1	-2.467517096
BP	GO:0042531	positive regulation of tyrosine phosphorylation of STAT protein	19_GO:0048518 positive regulation of biological process	-2.908320915	3.882645141	10	Csf1r|Hes1|Ifng|Kit|Lck|Osm|Tnfrsf18|Cd40|Tslp|Il23a	-1.374767121
BP	GO:0042509	regulation of tyrosine phosphorylation of STAT protein	19_GO:0023052 signaling	-2.077829285	2.943147161	10	Csf1r|Hes1|Ifng|Kit|Lck|Osm|Tnfrsf18|Cd40|Tslp|Il23a	-0.802208308
BP	GO:0035456	response to interferon-beta	19_GO:0050896 response to stimulus	-5.313566376	5.918136901	14	Gbp2|Ifi204|Ifi47|Ifit1|Ifit3|Acod1|Plscr1|Ikbke|Ifitm3|Ifitm1|Ifitm2|Ifi205|Ifi209|Ifi208	-3.20671025
BP	GO:0035455	response to interferon-alpha	19_GO:0050896 response to stimulus	-4.356137271	5.71962627	8	Ifi204|Ifit1|Ifit2|Ifit3|Plscr1|Ifitm3|Ifitm1|Ifitm2	-2.481758938
BP	GO:0035458	cellular response to interferon-beta	19_GO:0050896 response to stimulus	-2.834013724	3.87061296	9	Gbp2|Ifi204|Ifi47|Ifit1|Ifit3|Acod1|Ifi205|Ifi209|Ifi208	-1.325098163
BP	GO:0035457	cellular response to interferon-alpha	19_GO:0050896 response to stimulus	-2.39531027	4.043205276	4	Ifi204|Ifit1|Ifit2|Ifit3	-1.020696423
MF	GO:0019955	cytokine binding		-5.313295785	5.444541269	23	Acvr2b|Cd44|Cxcr4|Ccr1|Ccr2|Ccr7|Csf1r|Eng|Fzd4|Pdpn|Il18bp|Il1r2|Il1rn|Il2ra|Il2rb|Il2rg|Il3ra|Kit|Plp2|Tgfbr1|Tgfbr2|Thbs1|Tnfrsf9	-3.20671025
MF	GO:0019838	growth factor binding		-3.846446906	4.346821574	21	Acvr2b|Col1a2|Eng|Erbb3|Flt3|Igfbp5|Igfbp6|Il1r2|Il1rn|Il2ra|Il2rb|Il2rg|Il3ra|Rps2|Pdgfb|Tgfbr1|Tgfbr2|Thbs1|Htra1|Sec61b|Htra3	-2.108906532
MF	GO:0004896	cytokine receptor activity		-2.316992675	3.114532048	13	Cd44|Cxcr4|Ccr1|Ccr2|Ccr7|Flt3|Fzd4|Il1r2|Il2ra|Il2rb|Il2rg|Il3ra|Gpr35	-0.966369565
MF	GO:0050839	cell adhesion molecule binding		-5.197853011	5.115517129	34	Adam8|Arvcf|Ctnnd1|Cdh15|Cdk5r1|Fn1|Gfap|S1pr2|Igf2|Il1b|Itga5|Itgb1bp1|Itgb2l|Itgb7|Jup|Ndrg1|Nos2|Numb|Fxyd5|Prkca|Ppp1ca|Ptprm|Sell|Spp1|Tgfbi|Thbs1|Tjp1|Trpc4|Cdh23|Vwf|Tjp3|Pkp3|Gpnmb|Isg15	-3.131516513
BP	GO:0007229	integrin-mediated signaling pathway	19_GO:0023052 signaling	-2.890564984	3.677300697	14	Abl1|Cd63|Dmtn|Fgr|Fn1|Itga5|Itgax|Itgb1bp1|Itgb2l|Itgb7|Nme2|Timp1|Itga9|Isg15	-1.36494373
MF	GO:0005178	integrin binding		-2.58008753	3.29182028	17	Adam8|Fn1|Gfap|S1pr2|Igf2|Il1b|Itga5|Itgb1bp1|Itgb2l|Itgb7|Prkca|Spp1|Tgfbi|Thbs1|Vwf|Gpnmb|Isg15	-1.143603724
CC	GO:0001726	ruffle		-5.194609133	5.325077395	24	Abl1|Anxa2|Fscn1|Fgr|Pdpn|Hsp90aa1|Itga5|Itgb1bp1|Nme1|Nme2|Plcg1|S100a6|Fgd2|Knstrn|Pdlim7|Eps8l1|Clasp2|Arap3|Aif1l|Rasa1|Gsn|Asap3|Frmd4b|Scimp	-3.130775579
CC	GO:0031252	cell leading edge		-4.122000552	4.269300326	43	Abl1|Adora2a|Anxa2|Ctnnd1|Cd44|Cxcr4|Epha2|Fscn1|Fgr|Srgap2|Pdpn|Hsp90aa1|Itga5|Itgb1bp1|Fam89b|Nme1|Nme2|Plcg1|Pld1|Ptprm|S100a6|Sgce|Stx3|Vim|Coro1c|Fgd2|Knstrn|Arpc3|Pdlim7|Eps8l1|Arpin|Arhgef6|Clasp2|Kcnc4|Exoc8|Arap3|Aif1l|Rasa1|Gsn|Asap3|Frmd4b|Ppp1r9a|Scimp	-2.300495998
CC	GO:0030027	lamellipodium		-2.585817898	3.245549573	20	Ctnnd1|Cd44|Epha2|Fscn1|Srgap2|Pdpn|Itgb1bp1|Fam89b|Nme2|Plcg1|Pld1|Ptprm|Stx3|Coro1c|Arpc3|Arpin|Arhgef6|Arap3|Gsn|Ppp1r9a	-1.148239144
MF	GO:0008289	lipid binding		-5.141381624	4.756464444	78	Afp|Anxa4|Anxa5|Anxa8|Fabp4|Apoc1|Apoc2|Apod|Bax|Fabp7|Tspo|Anxa2|Capg|F10|Fabp3|Nr3c1|Hspa2|Id3|Itpr2|Fabp5|Lpl|Ltf|Melk|Map1b|Myo1b|Nme2|Pla2g2d|Pld1|Psmb4|S100a8|S100a9|Scin|Sell|Sh3gl2|Soat1|Sphk1|Scarb1|Stx3|Thbs1|Vill|Tlr2|Fgd2|Racgap1|Pla2g7|Phlda3|Atp5o|Bin1|Hs1bp3|Pitpnc1|Noxo1|Apol9b|Plekhf1|Mvb12a|Ophn1|Exoc8|Arap3|Ffar4|Nr3c2|Zcchc14|Mcoln3|Prom2|Fchsd2|Zfyve16|Soat2|Myof|Gsn|Sestd1|A…	-3.090912032
MF	GO:0005547	phosphatidylinositol-3,4,5-trisphosphate binding		-2.560161642	3.630558601	8	Anxa8|Myo1b|Racgap1|Phlda3|Arap3|Fchsd2|Zfyve16|Adap1	-1.132290487
MF	GO:0035091	phosphatidylinositol binding		-2.385776117	2.978989783	27	Anxa8|Anxa2|Capg|Itpr2|Myo1b|Pld1|Scin|Vill|Fgd2|Racgap1|Phlda3|Hs1bp3|Pitpnc1|Noxo1|Plekhf1|Exoc8|Arap3|Zcchc14|Fchsd2|Zfyve16|Gsn|Sestd1|Adap1|Phf12|Sbf2|Mreg|Rubcn	-1.017212825
MF	GO:0005543	phospholipid binding		-2.240755872	2.772147018	40	Anxa4|Anxa5|Anxa8|Anxa2|Capg|F10|Itpr2|Map1b|Myo1b|Pla2g2d|Pld1|Scin|Scarb1|Thbs1|Vill|Fgd2|Racgap1|Pla2g7|Phlda3|Bin1|Hs1bp3|Pitpnc1|Noxo1|Plekhf1|Ophn1|Exoc8|Arap3|Zcchc14|Fchsd2|Zfyve16|Myof|Gsn|Sestd1|Adap1|Cd300lf|Phf12|Prex1|Sbf2|Mreg|Rubcn	-0.914396578
MF	GO:0042803	protein homodimerization activity		-5.082388386	4.761144337	68	Adra2a|Gla|Ambp|Ang|Birc5|Atf3|Bax|Bcl2a1d|Csf1r|Cst7|Dck|Ect2|Eng|Eno1|Srgap2|Fzd4|Gbp2|Gch1|Rack1|Gzma|Hes1|Hsp90aa1|Kit|Lpl|Lrp6|Smad3|Nos2|Pdgfb|Padi2|Pirb|Rrm2|S100a1|S100a10|S100a6|Stc2|Bhlhe40|Tap1|Tpd52|Tpi1|Txn1|Tyms|Usf2|Wrn|Ercc5|Mgll|Map3k12|Knstrn|Hpgds|Mad2l1|Nudt21|Acot7|Flrt3|Sfpq|Tppp|Tmem192|Gale|Bcas1|Miga2|Hps4|Pde2a|Mapk4|Gimap7|Zbtb38|Tpm4|Dnph1|Glipr2|Eno1b|Trim5	-3.044883771
BP	GO:0010812	negative regulation of cell-substrate adhesion	19_GO:0022610 biological adhesion	-5.039179006	5.675040885	14	Angpt2|Apod|Dmtn|Fzd4|Gcnt2|Itgb1bp1|Lgals1|Pik3r1|Thbs1|Coro1c|Clasp2|Rasa1|Acer2|Ajap1	-3.018380084
BP	GO:0001953	negative regulation of cell-matrix adhesion	19_GO:0022610 biological adhesion	-4.304785745	5.359117224	10	Apod|Dmtn|Itgb1bp1|Pik3r1|Thbs1|Coro1c|Clasp2|Rasa1|Acer2|Ajap1	-2.441950802
BP	GO:0010810	regulation of cell-substrate adhesion	19_GO:0022610 biological adhesion	-4.215478911	4.502273704	28	Abl1|Macf1|Angpt2|Apod|Bst1|Dmtn|Fn1|Fzd4|Gcnt2|Pdpn|Itga5|Itgb1bp1|Jup|Lgals1|Smad3|Ninj1|Pik3r1|S100a10|Spp1|Thbs1|Coro1c|Net1|Smoc2|Clasp2|Rasa1|Acer2|Ajap1|Prex1	-2.370771248
BP	GO:0031589	cell-substrate adhesion	19_GO:0022610 biological adhesion	-3.666221221	3.97203066	38	Abl1|Macf1|Adam8|Angpt2|Apod|Bst1|Cd63|Efna1|Dmtn|Fn1|Srgap2|Fzd4|Gcnt2|Pdpn|Hpse|Itga5|Itgb1bp1|Itgb2l|Itgb7|Jup|Lamb3|Lgals1|Smad3|Mertk|Ninj1|Pik3r1|S100a10|Spp1|Thbs1|Vwf|Coro1c|Net1|Smoc2|Clasp2|Rasa1|Acer2|Ajap1|Prex1	-1.97326298
BP	GO:1901889	negative regulation of cell junction assembly	19_GO:0048519 negative regulation of biological process	-3.594197635	5.007888636	7	Apod|Dmtn|Il1b|Itgb1bp1|Rock2|Coro1c|Clasp2	-1.91916071
BP	GO:0001952	regulation of cell-matrix adhesion	19_GO:0022610 biological adhesion	-3.2276055	3.908309486	17	Abl1|Macf1|Apod|Bst1|Dmtn|Itgb1bp1|Jup|Smad3|Ninj1|Pik3r1|S100a10|Thbs1|Coro1c|Clasp2|Rasa1|Acer2|Ajap1	-1.628658744
BP	GO:1901888	regulation of cell junction assembly	19_GO:0071840 cellular component organization or biogenesis	-2.982516554	3.768406901	14	Abl1|Macf1|Apod|Dmtn|Epha2|Gja1|Il1b|Itgb1bp1|Smad3|Rock2|S100a10|Tjp1|Coro1c|Clasp2	-1.434722321
BP	GO:0034446	substrate adhesion-dependent cell spreading	19_GO:0022610 biological adhesion	-2.872906933	3.628356709	15	Abl1|Efna1|Dmtn|Fn1|Srgap2|Fzd4|Pdpn|Itgb1bp1|Itgb7|Lamb3|Mertk|S100a10|Coro1c|Net1|Prex1	-1.352259577
BP	GO:0051895	negative regulation of focal adhesion assembly	19_GO:0022610 biological adhesion	-2.623266795	4.125432277	5	Apod|Dmtn|Itgb1bp1|Coro1c|Clasp2	-1.176100297
BP	GO:0007160	cell-matrix adhesion	19_GO:0022610 biological adhesion	-2.413241513	3.041902499	23	Abl1|Macf1|Adam8|Apod|Bst1|Cd63|Dmtn|Fn1|Hpse|Itgb1bp1|Itgb2l|Itgb7|Jup|Smad3|Ninj1|Pik3r1|S100a10|Thbs1|Coro1c|Clasp2|Rasa1|Acer2|Ajap1	-1.030837651
BP	GO:1903392	negative regulation of adherens junction organization	19_GO:0048519 negative regulation of biological process	-2.288261013	3.635977431	5	Apod|Dmtn|Itgb1bp1|Coro1c|Clasp2	-0.949300414
BP	GO:0051893	regulation of focal adhesion assembly	19_GO:0022610 biological adhesion	-2.094721085	3.0066932	9	Abl1|Macf1|Apod|Dmtn|Itgb1bp1|Smad3|S100a10|Coro1c|Clasp2	-0.816513914
BP	GO:0090109	regulation of cell-substrate junction assembly	19_GO:0071840 cellular component organization or biogenesis	-2.094721085	3.0066932	9	Abl1|Macf1|Apod|Dmtn|Itgb1bp1|Smad3|S100a10|Coro1c|Clasp2	-0.816513914
BP	GO:0006220	pyrimidine nucleotide metabolic process	19_GO:0008152 metabolic process	-5.02941078	6.104439909	10	Dck|Nme1|Nme2|Dtymk|Cmpk2|Tyms|Upp1|Nt5c|Uck2|Dut	-3.0106556
BP	GO:0072527	pyrimidine-containing compound metabolic process	19_GO:0008152 metabolic process	-3.859458263	4.727026437	12	Dck|Nme1|Nme2|Tk1|Dtymk|Cmpk2|Tyms|Upp1|Nt5c|Dpys|Uck2|Dut	-2.117628527
BP	GO:0009219	pyrimidine deoxyribonucleotide metabolic process	19_GO:0008152 metabolic process	-3.621448213	5.580155009	5	Dtymk|Cmpk2|Tyms|Nt5c|Dut	-1.942699346
BP	GO:0006221	pyrimidine nucleotide biosynthetic process	19_GO:0008152 metabolic process	-3.466922046	4.851513955	7	Nme1|Nme2|Dtymk|Cmpk2|Tyms|Uck2|Dut	-1.814392462
BP	GO:0009263	deoxyribonucleotide biosynthetic process	19_GO:0008152 metabolic process	-3.219558235	4.994548262	5	Rrm2|Dtymk|Cmpk2|Tyms|Dut	-1.621386313
BP	GO:0009221	pyrimidine deoxyribonucleotide biosynthetic process	19_GO:0008152 metabolic process	-3.162338901	5.304980876	4	Dtymk|Cmpk2|Tyms|Dut	-1.577131956
BP	GO:0072528	pyrimidine-containing compound biosynthetic process	19_GO:0008152 metabolic process	-3.125026722	4.429975122	7	Nme1|Nme2|Dtymk|Cmpk2|Tyms|Uck2|Dut	-1.548007234
BP	GO:0009147	pyrimidine nucleoside triphosphate metabolic process	19_GO:0008152 metabolic process	-2.753166891	4.314809487	5	Nme1|Nme2|Dtymk|Cmpk2|Dut	-1.268163487
BP	GO:0009211	pyrimidine deoxyribonucleoside triphosphate metabolic process	19_GO:0008152 metabolic process	-2.731705881	5.14417927	3	Dtymk|Cmpk2|Dut	-1.256207659
BP	GO:0009265	2'-deoxyribonucleotide biosynthetic process	19_GO:0008152 metabolic process	-2.726547466	4.587021985	4	Dtymk|Cmpk2|Tyms|Dut	-1.256207659
BP	GO:0046385	deoxyribose phosphate biosynthetic process	19_GO:0008152 metabolic process	-2.726547466	4.587021985	4	Dtymk|Cmpk2|Tyms|Dut	-1.256207659
BP	GO:0006213	pyrimidine nucleoside metabolic process	19_GO:0008152 metabolic process	-2.38111754	3.611451187	6	Dck|Nme1|Nme2|Tk1|Upp1|Uck2	-1.017212825
BP	GO:0009148	pyrimidine nucleoside triphosphate biosynthetic process	19_GO:0008152 metabolic process	-2.256114687	3.815331706	4	Nme1|Nme2|Dtymk|Cmpk2	-0.925177258
BP	GO:0009130	pyrimidine nucleoside monophosphate biosynthetic process	19_GO:0008152 metabolic process	-2.226420272	4.158851146	3	Tyms|Uck2|Dut	-0.91028977
BP	GO:0009162	deoxyribonucleoside monophosphate metabolic process	19_GO:0008152 metabolic process	-2.226420272	4.158851146	3	Tyms|Dut|Dnph1	-0.91028977
MF	GO:0019205	nucleobase-containing compound kinase activity		-2.217434748	3.288694169	7	Dck|Nme1|Nme2|Tk1|Dtymk|Cmpk2|Uck2	-0.904928421
BP	GO:0009262	deoxyribonucleotide metabolic process	19_GO:0008152 metabolic process	-2.144082243	3.289364143	6	Rrm2|Dtymk|Cmpk2|Tyms|Nt5c|Dut	-0.848871376
BP	GO:0009129	pyrimidine nucleoside monophosphate metabolic process	19_GO:0008152 metabolic process	-2.041598195	3.801951702	3	Tyms|Uck2|Dut	-0.777607555
BP	GO:0030162	regulation of proteolysis	19_GO:0008152 metabolic process	-5.003538548	4.69156067	73	Adam8|Adora2a|Adra2a|Ambp|Anxa8|Birc5|Cd5l|Bax|Bcl2a1d|Capn3|Ctnnd1|Cd44|Cdkn2d|Cfh|Cst3|Cst7|Cstb|Ctla2a|Ecm1|Efna1|Wfdc18|Fas|Rack1|Gpld1|Ifng|Il1b|Il1r2|Klf4|Lck|Psmb8|Ltf|Smad3|Smad7|Naip6|Ngp|Pik3r1|Plk1|Psen2|Psme2|Rock2|S100a8|S100a9|Slpi|Serpina3g|Serpina3n|Aurka|Thbs1|Timp1|Nr1h3|Sufu|Bin1|Pbk|Mefv|Mtch2|Rpl23|Aqp11|Prelid1|Ecscr|Chac1|Ist1|Vsir|Il33|Ophn1|Cdc20|Papln|Sumo2|Fnip1|Gsn|Tri…	-2.988842225
BP	GO:0043086	negative regulation of catalytic activity	19_GO:0065007 biological regulation	-3.861812715	3.972798155	66	Abl1|Adora2a|Gla|Ambp|Anxa8|Fabp4|Birc5|Apoc1|Arg2|Bcl2a1d|Cd44|Cdkn1a|Cdkn1c|Cdkn2c|Cdkn2d|Cst3|Cst7|Cstb|Ecm1|Eng|Wfdc18|Gzma|Ifng|Il1b|Itgb1bp1|Klf4|Lrp6|Ltf|Smad7|Mcm2|Naip6|Nfkb1|Ngp|Prkca|Plk1|Psen2|Rgs2|Rock2|Slpi|Serpina3g|Serpina3n|Thbs1|Timp1|Coro1c|Gadd45g|Spry1|Bin1|Prdx5|Mad2l1|Chp1|Angptl4|Rpl23|Ubash3b|Hdac9|Sh3bp4|Papln|Hexim1|Csrnp2|Slc39a14|Fnip1|Trib3|Gprc5a|Dusp7|Tigar|Atp2b4|…	-2.118903986
MF	GO:0004869	cysteine-type endopeptidase inhibitor activity		-3.777033322	4.58327592	13	Birc5|Bcl2a1d|Cst3|Cst7|Cstb|Ltf|Naip6|Ngp|Serpina3g|Cd27|Tnfsf14|Prdx5|Cstdc4	-2.054180635
MF	GO:0004857	enzyme inhibitor activity		-3.020695592	3.456515693	39	Ambp|Birc5|Apoc1|Apoc2|Bcl2a1d|Anxa2|Cdkn1a|Cdkn1c|Cdkn2c|Cdkn2d|Cst3|Cst7|Cstb|Wfdc18|Rack1|Lrp6|Ltf|Naip6|Ngp|Slpi|Serpina3g|Serpina3n|Timp1|Cd27|Bin1|Tnfsf14|Ppp1r10|Prdx5|Chp1|Angptl4|Rpl23|Rnh1|Papln|Hexim1|Fnip1|Trib3|Atp2b4|Cstdc4|Wfdc17	-1.465055067
BP	GO:0045861	negative regulation of proteolysis	19_GO:0048519 negative regulation of biological process	-2.980016629	3.441329762	36	Adora2a|Ambp|Anxa8|Birc5|Bcl2a1d|Cd44|Cdkn2d|Cst3|Cst7|Cstb|Ctla2a|Ecm1|Efna1|Wfdc18|Il1r2|Klf4|Ltf|Naip6|Ngp|Pik3r1|Psen2|Slpi|Serpina3g|Serpina3n|Thbs1|Timp1|Nr1h3|Sufu|Bin1|Pbk|Rpl23|Aqp11|Chac1|Ophn1|Papln|Fnip1	-1.433598924
BP	GO:0052547	regulation of peptidase activity	19_GO:0008152 metabolic process	-2.944689799	3.383150526	41	Adora2a|Ambp|Anxa8|Birc5|Bax|Bcl2a1d|Cd44|Cdkn2d|Cst3|Cst7|Cstb|Ecm1|Efna1|Wfdc18|Fas|Rack1|Klf4|Lck|Psmb8|Ltf|Smad3|Naip6|Ngp|Psme2|Rock2|S100a8|S100a9|Slpi|Serpina3g|Serpina3n|Thbs1|Timp1|Bin1|Mefv|Mtch2|Prelid1|Vsir|Papln|Fnip1|Gsn|Acer2	-1.401012132
MF	GO:0061134	peptidase regulator activity		-2.664560517	3.237027956	27	Ambp|Birc5|Bcl2a1d|Anxa2|Cst3|Cst7|Cstb|Wfdc18|Fn1|Rack1|Ltf|Naip6|Ngp|Psme2|Slpi|Serpina3g|Serpina3n|Timp1|Cd27|Bin1|Tnfsf14|Acrbp|Prdx5|Vsir|Papln|Cstdc4|Wfdc17	-1.205605228
MF	GO:0061135	endopeptidase regulator activity		-2.501166619	3.115257199	24	Ambp|Birc5|Bcl2a1d|Anxa2|Cst3|Cst7|Cstb|Wfdc18|Ltf|Naip6|Ngp|Psme2|Slpi|Serpina3g|Serpina3n|Timp1|Cd27|Bin1|Tnfsf14|Prdx5|Vsir|Papln|Cstdc4|Wfdc17	-1.092050934
BP	GO:0052548	regulation of endopeptidase activity	19_GO:0008152 metabolic process	-2.341628352	2.897982575	33	Adora2a|Anxa8|Birc5|Bax|Bcl2a1d|Cd44|Cdkn2d|Cst7|Efna1|Fas|Rack1|Klf4|Lck|Psmb8|Ltf|Smad3|Naip6|Psme2|Rock2|S100a8|S100a9|Serpina3g|Serpina3n|Thbs1|Timp1|Bin1|Mefv|Mtch2|Prelid1|Vsir|Fnip1|Gsn|Acer2	-0.988370484
MF	GO:0043027	cysteine-type endopeptidase inhibitor activity involved in apoptotic process		-2.298172343	3.499190527	6	Birc5|Bcl2a1d|Naip6|Cd27|Tnfsf14|Prdx5	-0.953203621
BP	GO:0051346	negative regulation of hydrolase activity	19_GO:0065007 biological regulation	-2.219689593	2.764324492	37	Abl1|Adora2a|Ambp|Anxa8|Birc5|Apoc1|Bcl2a1d|Cd44|Cdkn2d|Cst3|Cst7|Cstb|Ecm1|Wfdc18|Gzma|Klf4|Ltf|Mcm2|Naip6|Ngp|Rgs2|Rock2|Slpi|Serpina3g|Serpina3n|Thbs1|Timp1|Spry1|Bin1|Chp1|Angptl4|Hdac9|Sh3bp4|Papln|Csrnp2|Slc39a14|Fnip1	-0.905551328
MF	GO:0004866	endopeptidase inhibitor activity		-2.131852066	2.773424466	22	Ambp|Birc5|Bcl2a1d|Anxa2|Cst3|Cst7|Cstb|Wfdc18|Ltf|Naip6|Ngp|Slpi|Serpina3g|Serpina3n|Timp1|Cd27|Bin1|Tnfsf14|Prdx5|Papln|Cstdc4|Wfdc17	-0.841356663
MF	GO:0043028	cysteine-type endopeptidase regulator activity involved in apoptotic process		-2.032978588	3.049092915	7	Birc5|Bcl2a1d|Rack1|Naip6|Cd27|Tnfsf14|Prdx5	-0.771134383
BP	GO:0051480	regulation of cytosolic calcium ion concentration	19_GO:0065007 biological regulation	-4.997923405	4.861562948	44	Abl1|Bax|Cacnb3|Capn3|Cd24a|Cd38|Cxcr4|Ccr1|Ccr2|Ccr7|Ddit3|Gja1|Gna15|Got1|Cxcl1|Gtf2i|Cxcl10|Il1b|Itpr2|Lck|Lrp6|Smad3|Oprl1|P2ry2|Plcg1|Ptger2|Ryr1|Cxcl2|Tgm2|Trpc3|Trpc4|Cdh23|Aplnr|Cd52|Ramp3|Gpr35|Ubash3b|Ffar4|Gpr18|Gpr55|Mtnr1b|Eif5a|Cxcl3|Atp2b4	-2.985744938
BP	GO:0055074	calcium ion homeostasis	19_GO:0065007 biological regulation	-4.481424191	4.457961077	52	Abl1|Bax|Cacnb3|Capn3|Cd24a|Cd38|Cxcr4|Ccr1|Ccr2|Ccr7|Ddit3|Gja1|Gna15|Got1|Cxcl1|Gtf2i|Cxcl10|Il1b|Itpr2|Lck|Lrp6|Smad3|Oprl1|P2ry2|Prkca|Plcg1|Psen2|Ptger2|Ryr1|Cxcl2|Stc2|Tgm2|Trim24|Cd40|Trpc3|Trpc4|Cdh23|Aplnr|Cd52|Ramp3|Gpr35|Mcub|Ubash3b|Ffar4|Gpr18|Fam20a|Gpr55|Inpp4b|Mtnr1b|Eif5a|Cxcl3|Atp2b4	-2.576769178
BP	GO:0006874	cellular calcium ion homeostasis	19_GO:0065007 biological regulation	-4.286804578	4.3377893	50	Abl1|Bax|Cacnb3|Capn3|Cd24a|Cd38|Cxcr4|Ccr1|Ccr2|Ccr7|Ddit3|Gja1|Gna15|Got1|Cxcl1|Gtf2i|Cxcl10|Il1b|Itpr2|Lck|Lrp6|Smad3|Oprl1|P2ry2|Prkca|Plcg1|Psen2|Ptger2|Ryr1|Cxcl2|Stc2|Tgm2|Cd40|Trpc3|Trpc4|Cdh23|Aplnr|Cd52|Ramp3|Gpr35|Mcub|Ubash3b|Ffar4|Gpr18|Gpr55|Inpp4b|Mtnr1b|Eif5a|Cxcl3|Atp2b4	-2.426808171
BP	GO:0055080	cation homeostasis	19_GO:0065007 biological regulation	-4.040260298	4.082115185	70	Abl1|Adora2a|Bax|Cacnb3|Capn3|Cd24a|Cd38|Cxcr4|Ccr1|Ccr2|Ccr7|Cp|Ddit3|Fxn|Fth1|Gja1|Gna15|Got1|Cxcl1|Gtf2i|Cxcl10|Il1b|Itpr2|Anpep|Lck|Lcn2|Lrp6|Ltf|Smad3|Oprl1|P2ry2|Prkca|Plcg1|Psen2|Ptger2|Ryr1|Cxcl2|Sod2|Stc2|Tgm2|Trim24|Cd40|Trpc3|Trpc4|Cdh23|Aplnr|Cd52|Nubp1|Clic4|Ramp3|Chp1|Gpr35|Aqp11|Mcub|Ubash3b|Ffar4|Slc12a6|Gpr18|Nr3c2|Fam20a|Slc39a14|Gpr55|Inpp4b|Dmxl1|Mtnr1b|Slc4a11|Eif5a|Slc26a9|C…	-2.241969524
BP	GO:0072507	divalent inorganic cation homeostasis	19_GO:0065007 biological regulation	-3.987139781	4.113109632	53	Abl1|Bax|Cacnb3|Capn3|Cd24a|Cd38|Cxcr4|Ccr1|Ccr2|Ccr7|Ddit3|Gja1|Gna15|Got1|Cxcl1|Gtf2i|Cxcl10|Il1b|Itpr2|Lck|Lrp6|Smad3|Oprl1|P2ry2|Prkca|Plcg1|Psen2|Ptger2|Ryr1|Cxcl2|Stc2|Tgm2|Trim24|Cd40|Trpc3|Trpc4|Cdh23|Aplnr|Cd52|Ramp3|Gpr35|Mcub|Ubash3b|Ffar4|Gpr18|Fam20a|Slc39a14|Gpr55|Inpp4b|Mtnr1b|Eif5a|Cxcl3|Atp2b4	-2.204671063
BP	GO:0072503	cellular divalent inorganic cation homeostasis	19_GO:0065007 biological regulation	-3.967909439	4.109806655	51	Abl1|Bax|Cacnb3|Capn3|Cd24a|Cd38|Cxcr4|Ccr1|Ccr2|Ccr7|Ddit3|Gja1|Gna15|Got1|Cxcl1|Gtf2i|Cxcl10|Il1b|Itpr2|Lck|Lrp6|Smad3|Oprl1|P2ry2|Prkca|Plcg1|Psen2|Ptger2|Ryr1|Cxcl2|Stc2|Tgm2|Cd40|Trpc3|Trpc4|Cdh23|Aplnr|Cd52|Ramp3|Gpr35|Mcub|Ubash3b|Ffar4|Gpr18|Slc39a14|Gpr55|Inpp4b|Mtnr1b|Eif5a|Cxcl3|Atp2b4	-2.192483488
BP	GO:0055065	metal ion homeostasis	19_GO:0065007 biological regulation	-3.916564155	4.017646519	64	Abl1|Adora2a|Bax|Cacnb3|Capn3|Cd24a|Cd38|Cxcr4|Ccr1|Ccr2|Ccr7|Cp|Ddit3|Fxn|Fth1|Gja1|Gna15|Got1|Cxcl1|Gtf2i|Cxcl10|Il1b|Itpr2|Anpep|Lck|Lcn2|Lrp6|Ltf|Smad3|Oprl1|P2ry2|Prkca|Plcg1|Psen2|Ptger2|Ryr1|Cxcl2|Sod2|Stc2|Tgm2|Trim24|Cd40|Trpc3|Trpc4|Cdh23|Aplnr|Cd52|Nubp1|Ramp3|Gpr35|Mcub|Ubash3b|Ffar4|Slc12a6|Gpr18|Nr3c2|Fam20a|Slc39a14|Gpr55|Inpp4b|Mtnr1b|Eif5a|Cxcl3|Atp2b4	-2.152628147
BP	GO:0007204	positive regulation of cytosolic calcium ion concentration	19_GO:0065007 biological regulation	-3.891206854	4.149766914	37	Abl1|Bax|Cacnb3|Capn3|Cd24a|Cd38|Cxcr4|Ccr1|Ccr2|Ccr7|Ddit3|Gja1|Gna15|Cxcl1|Cxcl10|Il1b|Itpr2|Lck|Lrp6|Oprl1|P2ry2|Plcg1|Ptger2|Ryr1|Cxcl2|Tgm2|Trpc3|Aplnr|Cd52|Ramp3|Gpr35|Ubash3b|Ffar4|Gpr18|Gpr55|Eif5a|Cxcl3	-2.136248828
BP	GO:0030003	cellular cation homeostasis	19_GO:0065007 biological regulation	-3.755355265	3.911869378	62	Abl1|Bax|Cacnb3|Capn3|Cd24a|Cd38|Cxcr4|Ccr1|Ccr2|Ccr7|Cp|Ddit3|Fxn|Fth1|Gja1|Gna15|Got1|Cxcl1|Gtf2i|Cxcl10|Il1b|Itpr2|Lck|Lcn2|Lrp6|Smad3|Oprl1|P2ry2|Prkca|Plcg1|Psen2|Ptger2|Ryr1|Cxcl2|Stc2|Tgm2|Cd40|Trpc3|Trpc4|Cdh23|Aplnr|Cd52|Nubp1|Clic4|Ramp3|Chp1|Gpr35|Aqp11|Mcub|Ubash3b|Ffar4|Gpr18|Nr3c2|Slc39a14|Gpr55|Inpp4b|Dmxl1|Mtnr1b|Slc4a11|Eif5a|Cxcl3|Atp2b4	-2.035708246
BP	GO:0006875	cellular metal ion homeostasis	19_GO:0065007 biological regulation	-3.719586164	3.905268879	57	Abl1|Bax|Cacnb3|Capn3|Cd24a|Cd38|Cxcr4|Ccr1|Ccr2|Ccr7|Cp|Ddit3|Fxn|Fth1|Gja1|Gna15|Got1|Cxcl1|Gtf2i|Cxcl10|Il1b|Itpr2|Lck|Lcn2|Lrp6|Smad3|Oprl1|P2ry2|Prkca|Plcg1|Psen2|Ptger2|Ryr1|Cxcl2|Stc2|Tgm2|Cd40|Trpc3|Trpc4|Cdh23|Aplnr|Cd52|Nubp1|Ramp3|Gpr35|Mcub|Ubash3b|Ffar4|Gpr18|Nr3c2|Slc39a14|Gpr55|Inpp4b|Mtnr1b|Eif5a|Cxcl3|Atp2b4	-2.009941111
BP	GO:0098771	inorganic ion homeostasis	19_GO:0065007 biological regulation	-3.606033342	3.783639532	69	Abl1|Adora2a|Bax|Cacnb3|Capn3|Cd24a|Cd38|Cxcr4|Ccr1|Ccr2|Ccr7|Cp|Ddit3|Fxn|Fth1|Gja1|Gna15|Got1|Cxcl1|Gtf2i|Cxcl10|Il1b|Itpr2|Anpep|Lck|Lcn2|Lrp6|Ltf|Smad3|Oprl1|P2ry2|Prkca|Plcg1|Psen2|Ptger2|Ryr1|Cxcl2|Sod2|Stc2|Tgm2|Trim24|Cd40|Trpc3|Trpc4|Cdh23|Aplnr|Cd52|Nubp1|Clic4|Ramp3|Chp1|Gpr35|Aqp11|Mcub|Ubash3b|Ffar4|Slc12a6|Gpr18|Nr3c2|Fam20a|Slc39a14|Gpr55|Inpp4b|Dmxl1|Mtnr1b|Eif5a|Slc26a9|Cxcl3|Atp…	-1.928215439
BP	GO:0006873	cellular ion homeostasis	19_GO:0065007 biological regulation	-3.492351816	3.722703731	62	Abl1|Bax|Cacnb3|Capn3|Cd24a|Cd38|Cxcr4|Ccr1|Ccr2|Ccr7|Cp|Ddit3|Fxn|Fth1|Gja1|Gna15|Got1|Cxcl1|Gtf2i|Cxcl10|Il1b|Itpr2|Lck|Lcn2|Lrp6|Smad3|Oprl1|P2ry2|Prkca|Plcg1|Psen2|Ptger2|Ryr1|Cxcl2|Stc2|Tgm2|Cd40|Trpc3|Trpc4|Cdh23|Aplnr|Cd52|Nubp1|Clic4|Ramp3|Chp1|Gpr35|Aqp11|Mcub|Ubash3b|Ffar4|Gpr18|Nr3c2|Slc39a14|Gpr55|Inpp4b|Dmxl1|Mtnr1b|Slc4a11|Eif5a|Cxcl3|Atp2b4	-1.835413113
BP	GO:0043270	positive regulation of ion transport	19_GO:0051179 localization	-3.165581111	3.601125773	35	Abl1|Adora2a|Arc|Bax|Tspo|Cacnb3|Capn3|Cxcr4|Ccr1|Fabp3|Nr3c1|Cxcl1|Hspa2|Cxcl10|Ifng|Il1b|Lgals3|Mif|P2ry2|Pdgfb|Abcb4|Abcb1a|Plcg1|S100a1|Trpc3|Aplnr|Atp8a2|Ramp3|Chp1|Ptges|Prelid1|P2ry12|Cyp4f18|Glrx|Kmo	-1.577131956
BP	GO:0051924	regulation of calcium ion transport	19_GO:0051179 localization	-2.74217279	3.288921621	29	Abl1|Adora2a|Bax|Tspo|Cacnb3|Capn3|Cxcr4|Ccr1|Gja1|Hes1|Hspa2|Cxcl10|Lgals3|Oprl1|Pdgfb|Plcg1|Psen2|S100a1|Stc2|Trpc3|Trpc4|Aplnr|Bin1|Usp2|Ramp3|Gpr35|P2ry12|Ubash3b|Sestd1	-1.261862372
BP	GO:0043269	regulation of ion transport	19_GO:0051179 localization	-2.622867951	3.04351228	63	Abl1|Adora2a|Arc|Arg1|Arg2|Bax|Tspo|Cacnb3|Capn3|Entpd1|Cd63|Cxcr4|Ccr1|Fabp3|Gja1|Nr3c1|Cxcl1|Hes1|Hspa2|Cxcl10|Ifng|Il1b|Il1rn|Kcnd1|Lgals3|Mef2c|Mif|Fxyd5|Oprl1|P2ry2|Pdgfb|Abcb4|Abcb1a|Prkca|Plcg1|Psen2|Rgs2|S100a1|Snta1|Stc2|Thbs1|Trpc3|Trpc4|Aplnr|Clic4|Bin1|Atp8a2|Usp2|Ramp3|Chp1|Kcnip3|Gpr35|Ptges|Prelid1|P2ry12|Cyp4f18|Ubash3b|Glrx|Kmo|Kcnc4|Sestd1|Mtnr1b|Atp2b4	-1.176100297
BP	GO:0010959	regulation of metal ion transport	19_GO:0051179 localization	-2.580535769	3.078970479	40	Abl1|Adora2a|Bax|Tspo|Cacnb3|Capn3|Cd63|Cxcr4|Ccr1|Gja1|Cxcl1|Hes1|Hspa2|Cxcl10|Ifng|Lgals3|Mif|Fxyd5|Oprl1|Pdgfb|Plcg1|Psen2|S100a1|Snta1|Stc2|Trpc3|Trpc4|Aplnr|Bin1|Usp2|Ramp3|Chp1|Kcnip3|Gpr35|P2ry12|Ubash3b|Glrx|Sestd1|Mtnr1b|Atp2b4	-1.143603724
BP	GO:0006816	calcium ion transport	19_GO:0051179 localization	-2.482242056	2.996576587	39	Abl1|Adora2a|Bax|Tspo|Cacnb3|Capn3|Cxcr4|Ccr1|Ddit3|Gja1|Hes1|Hspa2|Cxcl10|Itpr2|Kcnn4|Lck|Lgals3|Oprl1|Pdgfb|Plcg1|Psen2|Ryr1|S100a1|Stc2|Trpc3|Trpc4|Cdh23|Aplnr|Bin1|Usp2|Ramp2|Calcrl|Ramp3|Gpr35|Mcub|P2ry12|Ubash3b|Sestd1|Atp2b4	-1.078463349
BP	GO:0051928	positive regulation of calcium ion transport	19_GO:0051179 localization	-2.203229298	2.926141527	16	Abl1|Bax|Tspo|Cacnb3|Capn3|Cxcr4|Ccr1|Hspa2|Cxcl10|Lgals3|Pdgfb|Plcg1|S100a1|Trpc3|Aplnr|Ramp3	-0.893919266
BP	GO:0070838	divalent metal ion transport	19_GO:0051179 localization	-2.114894143	2.64969946	41	Abl1|Adora2a|Bax|Tspo|Cacnb3|Capn3|Cxcr4|Ccr1|Ddit3|Gja1|Hes1|Hspa2|Cxcl10|Ifng|Itpr2|Kcnn4|Lck|Lgals3|Oprl1|Pdgfb|Plcg1|Psen2|Ryr1|S100a1|Stc2|Trpc3|Trpc4|Cdh23|Aplnr|Bin1|Usp2|Ramp2|Calcrl|Ramp3|Gpr35|Mcub|P2ry12|Ubash3b|Slc39a14|Sestd1|Atp2b4	-0.829588668
BP	GO:0072511	divalent inorganic cation transport	19_GO:0051179 localization	-2.070063879	2.606597115	41	Abl1|Adora2a|Bax|Tspo|Cacnb3|Capn3|Cxcr4|Ccr1|Ddit3|Gja1|Hes1|Hspa2|Cxcl10|Ifng|Itpr2|Kcnn4|Lck|Lgals3|Oprl1|Pdgfb|Plcg1|Psen2|Ryr1|S100a1|Stc2|Trpc3|Trpc4|Cdh23|Aplnr|Bin1|Usp2|Ramp2|Calcrl|Ramp3|Gpr35|Mcub|P2ry12|Ubash3b|Slc39a14|Sestd1|Atp2b4	-0.797379815
BP	GO:0048247	lymphocyte chemotaxis	19_GO:0040011 locomotion	-4.962962113	5.689889648	13	Adam8|Ch25h|Ccr2|Ccr7|Cyp7b1|Cxcl10|Padi2|Ccl6|Ccl7|Ccl9|Tnfsf14|Cxcl14|Cxcl16	-2.956271445
BP	GO:0072676	lymphocyte migration	19_GO:0040011 locomotion	-4.535062918	5.014188652	18	Adam8|Apod|Ch25h|Ccr2|Ccr7|Cyp7b1|Ecm1|Gcsam|Cxcl10|Itgb7|Cd200|Padi2|Ccl6|Ccl7|Ccl9|Tnfsf14|Cxcl14|Cxcl16	-2.616062929
BP	GO:2000401	regulation of lymphocyte migration	19_GO:0040011 locomotion	-3.177136391	4.105741915	11	Adam8|Apod|Ccr2|Ccr7|Ecm1|Gcsam|Cxcl10|Cd200|Padi2|Tnfsf14|Cxcl14	-1.585876464
BP	GO:2000412	positive regulation of thymocyte migration	19_GO:0040011 locomotion	-3.110162586	5.876220327	3	Adam8|Ccr2|Ccr7	-1.539728987
BP	GO:1901623	regulation of lymphocyte chemotaxis	19_GO:0040011 locomotion	-2.870219209	4.266965787	6	Ccr2|Ccr7|Cxcl10|Padi2|Tnfsf14|Cxcl14	-1.352259577
BP	GO:2000410	regulation of thymocyte migration	19_GO:0040011 locomotion	-2.731705881	5.14417927	3	Adam8|Ccr2|Ccr7	-1.256207659
BP	GO:0072678	T cell migration	19_GO:0040011 locomotion	-2.612469411	3.556217558	10	Adam8|Apod|Ccr2|Ccr7|Ecm1|Cxcl10|Itgb7|Cd200|Tnfsf14|Cxcl16	-1.168967144
BP	GO:2000404	regulation of T cell migration	19_GO:0040011 locomotion	-2.305737904	3.321872572	8	Adam8|Apod|Ccr2|Ccr7|Ecm1|Cxcl10|Cd200|Tnfsf14	-0.958603121
BP	GO:0042088	T-helper 1 type immune response	19_GO:0002376 immune system process	-2.24717912	3.249921214	8	Ccr2|Ccr7|H2-Ab1|Il18bp|Il1b|Gadd45g|Il33|Il23a	-0.917912056
BP	GO:0072679	thymocyte migration	19_GO:0040011 locomotion	-2.226420272	4.158851146	3	Adam8|Ccr2|Ccr7	-0.91028977
BP	GO:0010818	T cell chemotaxis	19_GO:0040011 locomotion	-2.191384679	3.493863051	5	Ccr2|Ccr7|Cxcl10|Tnfsf14|Cxcl16	-0.885642581
BP	GO:0002825	regulation of T-helper 1 type immune response	19_GO:0002376 immune system process	-2.144082243	3.289364143	6	Ccr2|Ccr7|H2-Ab1|Il1b|Il33|Il23a	-0.848871376
BP	GO:0002827	positive regulation of T-helper 1 type immune response	19_GO:0002376 immune system process	-2.015289947	3.234364754	5	Ccr2|Ccr7|H2-Ab1|Il1b|Il23a	-0.76157685
CC	GO:0031262	Ndc80 complex		-4.924248875	8.001617728	4	Spc25|Nuf2|Ndc80|Spc24	-2.921506365
CC	GO:0030496	midbody		-4.793008825	5.05047289	23	Birc5|Anxa2|Aspm|Capg|Ctnnd1|Cdk1|Ect2|Erh|Rack1|Rab8a|Nek2|Plk1|Kif20a|Ran|Aurkb|Racgap1|Clic4|Cdca8|Anln|Ist1|Cep55|Ttc28|Prc1	-2.813229963
BP	GO:0061640	cytoskeleton-dependent cytokinesis	19_GO:0009987 cellular process	-3.90158687	4.551482693	16	Birc5|Rhob|Cenpa|Ect2|Plk1|Kif20a|Rock2|Aurkb|Racgap1|Spire1|Anln|Ist1|Cep55|Ckap2|Nusap1|Prc1	-2.144218179
BP	GO:0000281	mitotic cytokinesis	19_GO:0009987 cellular process	-3.71151088	4.520604399	13	Birc5|Rhob|Cenpa|Ect2|Plk1|Kif20a|Rock2|Racgap1|Anln|Cep55|Ckap2|Nusap1|Prc1	-2.005850208
BP	GO:0000910	cytokinesis	19_GO:0009987 cellular process	-3.333321348	3.909917703	21	Birc5|Rhob|Cdc25b|Cenpa|Ect2|Plk1|Pstpip1|Kif20a|Rock2|Plk4|Aurkb|Aurka|Racgap1|Spire1|Anln|Ist1|Cep55|Ckap2|Nusap1|Prc1|Setd2	-1.707172309
BP	GO:0000912	assembly of actomyosin apparatus involved in cytokinesis	19_GO:0071840 cellular component organization or biogenesis	-2.450098002	4.594024657	3	Ect2|Racgap1|Anln	-1.05865097
BP	GO:0000915	actomyosin contractile ring assembly	19_GO:0071840 cellular component organization or biogenesis	-2.450098002	4.594024657	3	Ect2|Racgap1|Anln	-1.05865097
BP	GO:0044837	actomyosin contractile ring organization	19_GO:0071840 cellular component organization or biogenesis	-2.450098002	4.594024657	3	Ect2|Racgap1|Anln	-1.05865097
BP	GO:0032506	cytokinetic process	19_GO:0009987 cellular process	-2.153649087	3.206272818	7	Ect2|Kif20a|Aurkb|Racgap1|Spire1|Anln|Cep55	-0.854056521
BP	GO:0030865	cortical cytoskeleton organization	19_GO:0071840 cellular component organization or biogenesis	-2.002546911	2.894358659	9	Rhob|Ect2|Epb41l2|Rock2|Fmnl3|Racgap1|Anln|Rhobtb1|Rnd3	-0.751974567
BP	GO:0006974	cellular response to DNA damage stimulus	19_GO:0050896 response to stimulus	-4.785187811	4.556150015	73	Abl1|Bax|Bcl2a1d|Cd44|Cdk1|Cdc7|Cdkn1a|Cdkn2d|Crip1|E2f1|Epha2|Eya1|Eya4|Fanca|Gtf2i|Herc2|Hmga2|Ifi204|Mcm2|Mcm4|Mcm5|Mcm6|Mif|Uhrf1|Pik3r1|Plk1|Pole|Rad51|Sod2|Sox4|Timeless|Plscr1|Ung|Wrn|Ercc5|Trp53bp1|Phlda3|Ppp1r10|Mtch2|Ikbke|Rad18|Huwe1|Fignl1|Shisa5|Ube2t|Cdca5|Pclaf|Etaa1|Spire1|Sfpq|Rfc5|Cdkn3|Mgme1|Shld2|Polq|Nuak1|Hdac9|Tex15|Rfc4|Kif22|Chaf1b|Egln3|Epc2|Acer2|Kmt5c|Smg1|Ankle1|Setd2…	-2.809120891
BP	GO:0080135	regulation of cellular response to stress	19_GO:0050896 response to stimulus	-4.430556535	4.348293776	68	Abl1|Arg2|Bax|Cd44|Cdkn2d|Ccr7|Dhfr|Eya1|Eya4|Fas|Fzd4|Gch1|Rack1|Gtf2i|Hmga2|Ier5|Il1b|Il1rn|Mdfic|Klf4|Lmnb1|Mif|Prdx1|Pik3r1|Rad51|Rock2|Sod2|Sphk1|Timeless|Cd27|Traf1|Traf5|Plscr1|Txn1|Nr1h3|Gadd45g|Fgd2|Map3k12|Map3k4|Map4k1|Slc7a11|Trp53bp1|Pbk|Ppp1r10|Mfhas1|Mtch2|Fignl1|Aqp11|Etaa1|Spire1|Ddah1|Aifm2|Sfpq|Mlkl|Shld2|Polq|Nuak1|Glrx|Tex15|Tlr3|Gpr37l1|Kmt5c|Smg1|Ankle1|Setd2|Rtn4rl1|Tigar|…	-2.539787785
BP	GO:0006281	DNA repair	19_GO:0050896 response to stimulus	-3.322979302	3.65449289	47	Abl1|Cdc7|Cdkn2d|Eya1|Eya4|Fanca|Gtf2i|Herc2|Hmga2|Mcm2|Mcm4|Mcm5|Mcm6|Uhrf1|Pole|Rad51|Timeless|Ung|Wrn|Ercc5|Trp53bp1|Rad18|Huwe1|Fignl1|Ube2t|Cdca5|Pclaf|Etaa1|Spire1|Sfpq|Rfc5|Mgme1|Shld2|Polq|Hdac9|Tex15|Rfc4|Kif22|Chaf1b|Epc2|Kmt5c|Smg1|Ankle1|Setd2|Eme1|Tigar|Dna2	-1.698478442
BP	GO:0000018	regulation of DNA recombination	19_GO:0008152 metabolic process	-3.293761966	3.999195807	16	Ifng|Rad51|Timeless|Cd40|Wrn|Trp53bp1|Rad18|Fignl1|Tnfsf13|Shld2|Polq|Tex15|Kmt5c|Ankle1|Setd2|Tnfsfm13	-1.675497716
BP	GO:2001020	regulation of response to DNA damage stimulus	19_GO:0050896 response to stimulus	-2.526426471	3.13905654	24	Abl1|Cd44|Cdkn2d|Eya1|Eya4|Gtf2i|Mif|Rad51|Timeless|Plscr1|Trp53bp1|Ppp1r10|Mtch2|Fignl1|Etaa1|Spire1|Shld2|Polq|Tex15|Kmt5c|Smg1|Ankle1|Setd2|Tigar	-1.11024072
BP	GO:0010569	regulation of double-strand break repair via homologous recombination	19_GO:0050896 response to stimulus	-2.305737904	3.321872572	8	Rad51|Timeless|Trp53bp1|Fignl1|Shld2|Polq|Tex15|Setd2	-0.958603121
BP	GO:0006310	DNA recombination	19_GO:0008152 metabolic process	-2.197194214	2.790396429	28	Cdc7|Hmgb3|Ifng|Mcm2|Mcm4|Mcm5|Mcm6|Psmc3ip|Rad51|Tep1|Timeless|Cd40|Ung|Wrn|Trp53bp1|Rad18|Fignl1|Tnfsf13|Sfpq|Shld2|Polq|Tex15|Chtf18|Kmt5c|Ankle1|Setd2|Eme1|Tnfsfm13	-0.888282069
BP	GO:0051052	regulation of DNA metabolic process	19_GO:0008152 metabolic process	-4.77539602	4.666441144	50	Bax|Ccna2|Cdk1|Cdc7|Cdkn1a|Cst3|Dnmt3a|Eya1|Eya4|Gja1|Gtf2i|Gzma|Hsp90aa1|Id3|Ifng|Klf4|Nek2|Pdgfb|Rad51|Aurkb|Timeless|Cd40|Wrn|Map3k4|Trp53bp1|Ppp1r10|Gmnn|Rad18|Fignl1|Kcnq1ot1|Smoc2|Cdt1|Spire1|Tnfsf13|Rfc5|Shld2|Polq|Tex15|Rfc4|Chtf18|Tasor|Niban2|Kmt5c|Smg1|Ankle1|Setd2|Zbtb38|Tigar|Dna2|Tnfsfm13	-2.803009584
BP	GO:0051054	positive regulation of DNA metabolic process	19_GO:0048518 positive regulation of biological process	-4.581109378	4.698008762	33	Bax|Cdk1|Cdc7|Cst3|Eya1|Eya4|Gtf2i|Hsp90aa1|Ifng|Klf4|Nek2|Pdgfb|Rad51|Aurkb|Timeless|Cd40|Wrn|Map3k4|Trp53bp1|Ppp1r10|Smoc2|Cdt1|Spire1|Tnfsf13|Rfc5|Shld2|Rfc4|Chtf18|Tasor|Kmt5c|Tigar|Dna2|Tnfsfm13	-2.650615103
BP	GO:0071897	DNA biosynthetic process	19_GO:0008152 metabolic process	-2.98562772	3.60159805	21	Cdkn1a|Cdkn2d|Gja1|Hsp90aa1|Klf4|Nek2|Pdgfb|Pole|Sphk1|Aurkb|Tep1|Tk1|Wrn|Map3k4|Nhp2|Smoc2|Pclaf|Rfc5|Rfc4|Chtf18|Niban2	-1.437143582
BP	GO:0006275	regulation of DNA replication	19_GO:0008152 metabolic process	-2.290531056	3.060189832	14	Ccna2|Cdk1|Cdc7|Cst3|Id3|Pdgfb|Timeless|Gmnn|Cdt1|Rfc5|Rfc4|Chtf18|Zbtb38|Dna2	-0.949300414
BP	GO:0030336	negative regulation of cell migration	19_GO:0040011 locomotion	-4.744010399	4.787016299	35	Angpt2|Apod|Rhob|Cd63|Eng|Fas|Srgap2|Gcsam|Gja1|Adgrg1|Igfbp5|Il1rn|Itgb1bp1|Jup|Klf4|Mef2c|Mif|Cd200|Cited2|Pdgfb|Padi2|Ptprm|Thbs1|Timp1|Coro1c|Clic4|Rgcc|Rap2b|Clasp2|Il33|Arap3|Gpr18|Sema6d|Nav3|Atp2b4	-2.784125293
BP	GO:2000146	negative regulation of cell motility	19_GO:0040011 locomotion	-4.324995327	4.488516736	35	Angpt2|Apod|Rhob|Cd63|Eng|Fas|Srgap2|Gcsam|Gja1|Adgrg1|Igfbp5|Il1rn|Itgb1bp1|Jup|Klf4|Mef2c|Mif|Cd200|Cited2|Pdgfb|Padi2|Ptprm|Thbs1|Timp1|Coro1c|Clic4|Rgcc|Rap2b|Clasp2|Il33|Arap3|Gpr18|Sema6d|Nav3|Atp2b4	-2.454981799
BP	GO:0051271	negative regulation of cellular component movement	19_GO:0048519 negative regulation of biological process	-3.672474544	3.993260142	36	Angpt2|Apod|Rhob|Cd63|Eng|Fas|Srgap2|Gcsam|Gja1|Adgrg1|Igfbp5|Il1rn|Itgb1bp1|Jup|Klf4|Mef2c|Mif|Cd200|Cited2|Pdgfb|Padi2|Ptprm|Thbs1|Timp1|Coro1c|Clic4|Bin1|Rgcc|Rap2b|Clasp2|Il33|Arap3|Gpr18|Sema6d|Nav3|Atp2b4	-1.977586102
BP	GO:0040013	negative regulation of locomotion	19_GO:0040011 locomotion	-3.580001466	3.913960832	37	Adora2a|Angpt2|Apod|Rhob|Cd63|Eng|Fas|Srgap2|Gcsam|Gja1|Adgrg1|Igfbp5|Il1rn|Itgb1bp1|Jup|Klf4|Mef2c|Mif|Cd200|Cited2|Pdgfb|Padi2|Ptprm|Thbs1|Timp1|Trim26|Coro1c|Clic4|Rgcc|Rap2b|Clasp2|Il33|Arap3|Gpr18|Sema6d|Nav3|Atp2b4	-1.906808681
BP	GO:1901343	negative regulation of vasculature development	19_GO:0048519 negative regulation of biological process	-3.291860974	3.915997182	19	Angpt2|Ccr2|Epha2|Gtf2i|Cxcl10|Ifng|Itgb1bp1|Klf4|Ngp|Pde3b|Pdgfb|Pgk1|Ptprm|Rock2|Sparc|Thbs1|Rgcc|Ecscr|Atp2b4	-1.675263901
BP	GO:0043537	negative regulation of blood vessel endothelial cell migration	19_GO:0040011 locomotion	-3.191919114	4.377582235	8	Angpt2|Itgb1bp1|Jup|Klf4|Mef2c|Thbs1|Rgcc|Atp2b4	-1.59836739
BP	GO:0016525	negative regulation of angiogenesis	19_GO:0048519 negative regulation of biological process	-3.102207547	3.79214698	17	Angpt2|Ccr2|Epha2|Gtf2i|Cxcl10|Itgb1bp1|Klf4|Ngp|Pde3b|Pgk1|Ptprm|Rock2|Sparc|Thbs1|Rgcc|Ecscr|Atp2b4	-1.534397387
BP	GO:2000181	negative regulation of blood vessel morphogenesis	19_GO:0048519 negative regulation of biological process	-2.942861039	3.642486324	17	Angpt2|Ccr2|Epha2|Gtf2i|Cxcl10|Itgb1bp1|Klf4|Ngp|Pde3b|Pgk1|Ptprm|Rock2|Sparc|Thbs1|Rgcc|Ecscr|Atp2b4	-1.399865688
BP	GO:0010633	negative regulation of epithelial cell migration	19_GO:0040011 locomotion	-2.510850251	3.394990239	11	Angpt2|Cd63|Itgb1bp1|Jup|Klf4|Mef2c|Ptprm|Thbs1|Coro1c|Rgcc|Atp2b4	-1.09821392
BP	GO:0010596	negative regulation of endothelial cell migration	19_GO:0040011 locomotion	-2.458880035	3.439200953	9	Angpt2|Itgb1bp1|Jup|Klf4|Mef2c|Ptprm|Thbs1|Rgcc|Atp2b4	-1.061135258
BP	GO:0051051	negative regulation of transport	19_GO:0048519 negative regulation of biological process	-4.738507881	4.61021273	55	Adra2a|Anxa5|Apoc1|Apoc2|Apod|Arg2|Cacnb3|Entpd1|Ccr2|Dmtn|Erbb3|Fn1|Gja1|Rack1|Hes1|Il1b|Il1rn|Itgb1bp1|Mdfic|Fabp5|Anpep|Lgals3|Cd200|Map1b|Oprl1|Osm|Pde3b|Prkca|Srgn|Rgs2|Sct|Thbs1|Txn1|Nr1h3|Vpreb3|Tlr2|Bin1|Usp2|Chp1|Rsad2|Gpr35|Rgcc|P2ry12|Cyp4f18|Il33|Hdac9|Cttnbp2nl|Pkdcc|Ffar4|Prom2|Sestd1|Ppp1r9a|Mtnr1b|Cd300lf|Rubcn	-2.782308205
BP	GO:0090087	regulation of peptide transport	19_GO:0051179 localization	-4.015803693	4.082384645	65	Adora2a|Adra2a|Ang|Anxa5|Birc5|Apod|Arg2|Cacnb3|Cd38|Cdk1|Cdk5r1|Csf1r|Ect2|Dmtn|Fgr|Fn1|Gja1|Glul|Rack1|Gpld1|Hmga2|Hsp90aa1|Ifng|Il1b|Itgb1bp1|Jup|Kcnn4|Mdfic|Lpl|Rab8a|Mif|Cd200|Nos2|Pcm1|Pde3b|Pik3r1|Srgn|Ran|S100a8|S100a9|Sct|Sox4|Cd40|Txn1|Nr1h3|Vpreb3|Tlr2|Slc7a11|Chp1|Clec4e|Clec4n|Rsad2|Rgcc|Il33|Hdac9|Hcar2|Glrx|Slc9b2|Pkdcc|Ffar4|Ice1|Setd2|Mtnr1b|Smo|Parl	-2.226176112
BP	GO:0051223	regulation of protein transport	19_GO:0051179 localization	-3.820641991	3.961590314	61	Adora2a|Adra2a|Ang|Anxa5|Birc5|Apod|Arg2|Cacnb3|Cd38|Cdk1|Cdk5r1|Csf1r|Ect2|Dmtn|Fgr|Fn1|Gja1|Glul|Rack1|Gpld1|Hsp90aa1|Ifng|Il1b|Itgb1bp1|Jup|Kcnn4|Mdfic|Lpl|Rab8a|Mif|Cd200|Nos2|Pcm1|Pde3b|Pik3r1|Srgn|Ran|Sox4|Cd40|Txn1|Nr1h3|Vpreb3|Tlr2|Slc7a11|Chp1|Clec4e|Clec4n|Rsad2|Rgcc|Il33|Hdac9|Hcar2|Glrx|Slc9b2|Pkdcc|Ffar4|Ice1|Setd2|Mtnr1b|Smo|Parl	-2.08734903
BP	GO:0051224	negative regulation of protein transport	19_GO:0048519 negative regulation of biological process	-3.713748988	4.193399383	23	Adra2a|Anxa5|Apod|Arg2|Dmtn|Fn1|Il1b|Itgb1bp1|Mdfic|Cd200|Pde3b|Srgn|Txn1|Nr1h3|Vpreb3|Chp1|Rsad2|Rgcc|Il33|Hdac9|Pkdcc|Ffar4|Mtnr1b	-2.007095642
BP	GO:1904950	negative regulation of establishment of protein localization	19_GO:0048519 negative regulation of biological process	-3.529397027	4.039904943	23	Adra2a|Anxa5|Apod|Arg2|Dmtn|Fn1|Il1b|Itgb1bp1|Mdfic|Cd200|Pde3b|Srgn|Txn1|Nr1h3|Vpreb3|Chp1|Rsad2|Rgcc|Il33|Hdac9|Pkdcc|Ffar4|Mtnr1b	-1.86440732
BP	GO:0051048	negative regulation of secretion	19_GO:0048519 negative regulation of biological process	-3.28149653	3.77284195	27	Adra2a|Anxa5|Arg2|Entpd1|Ccr2|Erbb3|Fn1|Gja1|Il1b|Il1rn|Anpep|Cd200|Osm|Pde3b|Srgn|Sct|Nr1h3|Vpreb3|Rsad2|Rgcc|P2ry12|Cyp4f18|Il33|Hdac9|Ffar4|Ppp1r9a|Mtnr1b	-1.666755507
BP	GO:0070201	regulation of establishment of protein localization	19_GO:0051179 localization	-3.263998607	3.556233535	61	Adora2a|Adra2a|Ang|Anxa5|Birc5|Apod|Arg2|Cacnb3|Cd38|Cdk1|Cdk5r1|Csf1r|Ect2|Dmtn|Fgr|Fn1|Gja1|Glul|Rack1|Gpld1|Hsp90aa1|Ifng|Il1b|Itgb1bp1|Jup|Kcnn4|Mdfic|Lpl|Rab8a|Mif|Cd200|Nos2|Pcm1|Pde3b|Pik3r1|Srgn|Ran|Sox4|Cd40|Txn1|Nr1h3|Vpreb3|Tlr2|Slc7a11|Chp1|Clec4e|Clec4n|Rsad2|Rgcc|Il33|Hdac9|Hcar2|Glrx|Slc9b2|Pkdcc|Ffar4|Ice1|Setd2|Mtnr1b|Smo|Parl	-1.651663653
BP	GO:0050663	cytokine secretion	19_GO:0051179 localization	-3.102207547	3.79214698	17	Arg2|Csf1r|Fgr|Fn1|Ifng|Lpl|Mif|Srgn|Tlr2|Clec4e|Clec4n|Trem1|Rgcc|Il33|Hdac9|Ffar4|Tmem106a	-1.534397387
BP	GO:0050709	negative regulation of protein secretion	19_GO:0048519 negative regulation of biological process	-2.946315575	3.671344822	16	Adra2a|Anxa5|Arg2|Fn1|Il1b|Cd200|Pde3b|Srgn|Nr1h3|Vpreb3|Rsad2|Rgcc|Il33|Hdac9|Ffar4|Mtnr1b	-1.401954518
BP	GO:1903531	negative regulation of secretion by cell	19_GO:0048519 negative regulation of biological process	-2.818342168	3.420387642	23	Adra2a|Anxa5|Arg2|Entpd1|Ccr2|Fn1|Gja1|Il1b|Il1rn|Cd200|Osm|Pde3b|Srgn|Nr1h3|Vpreb3|Rsad2|Rgcc|P2ry12|Il33|Hdac9|Ffar4|Ppp1r9a|Mtnr1b	-1.31319219
BP	GO:0050707	regulation of cytokine secretion	19_GO:0051179 localization	-2.789837847	3.546547597	15	Arg2|Csf1r|Fgr|Fn1|Ifng|Lpl|Mif|Srgn|Tlr2|Clec4e|Clec4n|Rgcc|Il33|Hdac9|Ffar4	-1.291778952
BP	GO:0002791	regulation of peptide secretion	19_GO:0051179 localization	-2.778856683	3.240157447	42	Adora2a|Adra2a|Ang|Anxa5|Birc5|Arg2|Cd38|Csf1r|Fgr|Fn1|Gja1|Glul|Gpld1|Hmga2|Ifng|Il1b|Kcnn4|Lpl|Mif|Cd200|Nos2|Pde3b|Srgn|S100a8|S100a9|Sct|Sox4|Cd40|Nr1h3|Vpreb3|Tlr2|Clec4e|Clec4n|Rsad2|Rgcc|Il33|Hdac9|Hcar2|Glrx|Slc9b2|Ffar4|Mtnr1b	-1.281755158
BP	GO:0002790	peptide secretion	19_GO:0051179 localization	-2.627075908	3.081259185	50	Acvr2b|Adora2a|Adra2a|Ang|Anxa5|Birc5|Arg2|Cd38|Csf1r|Dmtn|Fgr|Fn1|Gja1|Glul|Gpld1|Hmga2|Ifng|Il1b|Il1rn|Kcnn4|Lpl|Rab8a|Mif|Cd200|Nos2|Pde3b|Plcg1|Srgn|S100a8|S100a9|Sct|Sox4|Cd40|Cd27|Nr1h3|Vpreb3|Tlr2|Clec4e|Clec4n|Rsad2|Trem1|Rgcc|Il33|Hdac9|Hcar2|Glrx|Slc9b2|Ffar4|Tmem106a|Mtnr1b	-1.178117608
BP	GO:0002792	negative regulation of peptide secretion	19_GO:0048519 negative regulation of biological process	-2.600916898	3.333742586	16	Adra2a|Anxa5|Arg2|Fn1|Il1b|Cd200|Pde3b|Srgn|Nr1h3|Vpreb3|Rsad2|Rgcc|Il33|Hdac9|Ffar4|Mtnr1b	-1.159759205
BP	GO:0009306	protein secretion	19_GO:0051179 localization	-2.575799454	3.050813711	46	Acvr2b|Adora2a|Adra2a|Ang|Anxa5|Birc5|Arg2|Cd38|Csf1r|Dmtn|Fgr|Fn1|Gja1|Glul|Gpld1|Ifng|Il1b|Il1rn|Kcnn4|Lpl|Rab8a|Mif|Cd200|Nos2|Pde3b|Plcg1|Srgn|Sox4|Cd40|Cd27|Nr1h3|Vpreb3|Tlr2|Clec4e|Clec4n|Rsad2|Trem1|Rgcc|Il33|Hdac9|Hcar2|Glrx|Slc9b2|Ffar4|Tmem106a|Mtnr1b	-1.143603724
BP	GO:0050708	regulation of protein secretion	19_GO:0051179 localization	-2.545865082	3.057784568	38	Adora2a|Adra2a|Ang|Anxa5|Birc5|Arg2|Cd38|Csf1r|Fgr|Fn1|Gja1|Glul|Gpld1|Ifng|Il1b|Kcnn4|Lpl|Mif|Cd200|Nos2|Pde3b|Srgn|Sox4|Cd40|Nr1h3|Vpreb3|Tlr2|Clec4e|Clec4n|Rsad2|Rgcc|Il33|Hdac9|Hcar2|Glrx|Slc9b2|Ffar4|Mtnr1b	-1.125124853
BP	GO:1903530	regulation of secretion by cell	19_GO:0051179 localization	-2.331691684	2.795858201	62	Adora2a|Adora2b|Adra2a|Ang|Anxa5|Birc5|Arg2|Cd38|Entpd1|Ccr2|Csf1r|Fgr|Fn1|Gja1|Glul|Gpld1|Nr3c1|Hmga2|Ifng|Il1b|Il1rn|Kcnn4|Lgals3|Lpl|Mef2c|Rab8a|Mif|Cd200|Nos2|Osm|P2ry2|Pde3b|Prkca|Srgn|Sct|Sox4|Sphk1|Spp1|Sdc1|Cd40|Nr1h3|Vamp1|Vpreb3|Tlr2|Clec4e|Clec4n|Rsad2|Rgcc|Sncaip|P2ry12|Clasp2|Il33|Hdac9|Hcar2|Glrx|Slc9b2|Kmo|Kcnc4|Ffar4|Nr3c2|Ppp1r9a|Mtnr1b	-0.979313846
BP	GO:0050710	negative regulation of cytokine secretion	19_GO:0048519 negative regulation of biological process	-2.298172343	3.499190527	6	Arg2|Fn1|Srgn|Rgcc|Hdac9|Ffar4	-0.953203621
BP	GO:0051222	positive regulation of protein transport	19_GO:0051179 localization	-2.066693459	2.629912559	34	Adora2a|Ang|Cacnb3|Cd38|Cdk1|Cdk5r1|Csf1r|Ect2|Fgr|Gja1|Glul|Rack1|Gpld1|Hsp90aa1|Ifng|Itgb1bp1|Jup|Kcnn4|Lpl|Mif|Pcm1|Pik3r1|Ran|Sox4|Tlr2|Chp1|Clec4e|Clec4n|Rgcc|Il33|Hcar2|Glrx|Ice1|Smo	-0.794740531
MF	GO:0016301	kinase activity		-4.721927777	4.520125424	72	Abl1|Acvr2b|Bub1|Bub1b|Ccne1|Cdk1|Cdc7|Cdk5r1|Cdkn1a|Chka|Csf1r|Dck|Eng|Epha2|Erbb3|Fgr|Flt3|Gucy2c|Kit|Lck|Melk|Mertk|Nek2|Nme1|Nme2|Pgk1|Pik3r1|Pim1|Pkm|Prkca|Plk1|Prkab1|Rock2|Sphk1|Plk4|Aurkb|Aurka|Tgfbr1|Tgfbr2|Trim24|Tk1|Dtymk|Ttk|Cmpk2|Yes1|Nek3|Papss2|Map3k12|Map3k4|Map4k1|Ulk2|Pbk|Htatip2|Pfkp|Ikbke|Srpk3|Mmd|Pmvk|Nmrk2|Mlkl|Nuak1|Cdk19|Fam20c|Uck2|Pkdcc|Bmp2k|Trio|Mapk4|Trib3|Smg1|Brsk1…	-2.770992341
MF	GO:0016773	phosphotransferase activity, alcohol group as acceptor		-3.571219423	3.776792251	63	Abl1|Acvr2b|Bub1|Bub1b|Cdk1|Cdc7|Cdkn1a|Chka|Csf1r|Eng|Epha2|Erbb3|Fgr|Flt3|Gucy2c|Kit|Lck|Melk|Mertk|Nek2|Nme2|Pik3r1|Pim1|Pkm|Prkca|Plk1|Prkab1|Rock2|Sphk1|Plk4|Aurkb|Aurka|Tgfbr1|Tgfbr2|Trim24|Ttk|Yes1|Nek3|Papss2|Map3k12|Map3k4|Map4k1|Ulk2|Pbk|Htatip2|Pfkp|Ikbke|Srpk3|Mmd|Nmrk2|Mlkl|Nuak1|Cdk19|Fam20c|Pkdcc|Bmp2k|Fam20a|Trio|Mapk4|Trib3|Smg1|Brsk1|Map4k5	-1.900778249
MF	GO:0004672	protein kinase activity		-3.482136265	3.740074785	55	Abl1|Acvr2b|Bub1|Bub1b|Cdk1|Cdc7|Cdkn1a|Csf1r|Eng|Epha2|Erbb3|Fgr|Flt3|Gucy2c|Kit|Lck|Melk|Mertk|Nek2|Nme2|Pim1|Prkca|Plk1|Prkab1|Rock2|Plk4|Aurkb|Aurka|Tgfbr1|Tgfbr2|Trim24|Ttk|Yes1|Nek3|Map3k12|Map3k4|Map4k1|Ulk2|Pbk|Htatip2|Ikbke|Srpk3|Mmd|Mlkl|Nuak1|Cdk19|Fam20c|Pkdcc|Bmp2k|Trio|Mapk4|Trib3|Smg1|Brsk1|Map4k5	-1.826966585
BP	GO:0046777	protein autophosphorylation	19_GO:0008152 metabolic process	-2.651300603	3.234449655	26	Abl1|Ctnnd1|Csf1r|Eng|Fgr|Flt3|Kit|Lck|Melk|Nek2|Nme2|Pdgfb|Pim1|Prkca|Tgfbr1|Trim24|Ttk|Yes1|Map3k12|Map4k1|Ulk2|Htatip2|Chp1|Rap2b|Gpnmb|Smg1	-1.197927582
MF	GO:0004674	protein serine/threonine kinase activity		-2.163638353	2.703266848	39	Acvr2b|Bub1|Bub1b|Cdk1|Cdc7|Eng|Melk|Nek2|Nme2|Pim1|Prkca|Plk1|Prkab1|Rock2|Plk4|Aurkb|Aurka|Tgfbr1|Tgfbr2|Ttk|Nek3|Map3k12|Map3k4|Map4k1|Ulk2|Pbk|Htatip2|Ikbke|Srpk3|Mlkl|Nuak1|Cdk19|Fam20c|Bmp2k|Trio|Mapk4|Smg1|Brsk1|Map4k5	-0.861435116
CC	GO:0062023	collagen-containing extracellular matrix		-4.712085521	4.670597316	44	Angpt2|Ambp|Ang|Anxa4|Anxa5|Anxa2|Entpd1|Col1a2|Cst3|Cstb|Ecm1|Fcnb|Fgl2|Fn1|Hsp90aa1|Igf2|Igfbp6|Lamb3|Rpsa|Lgals1|Lgals3|Pkm|S100a10|S100a6|Sparc|Tgfbi|Tgm2|Thbs1|Timp1|Plscr1|Vwf|Htra1|Angptl4|Smoc2|Plxdc2|Nav2|Cela1|Papln|Sema6d|Adamts2|Adamtsl4|Spon1|Emilin2|Col27a1	-2.764624459
CC	GO:0031012	extracellular matrix		-3.236652904	3.57871374	49	Angpt2|Ambp|Ang|Anxa4|Anxa5|Anxa2|Entpd1|Col1a2|Cst3|Cstb|Ecm1|Fcnb|Fgl2|Fn1|Gpld1|Hpse|Hsp90aa1|Igf2|Igfbp6|Lamb3|Rpsa|Lgals1|Lgals3|Mmp15|Pkm|S100a10|S100a6|Sparc|Tgfbi|Tgm2|Thbs1|Timp1|Plscr1|Vwf|Htra1|Angptl4|Mmp19|Smoc2|Plxdc2|Nav2|Cela1|Papln|Sema6d|Adamts2|Adamtsl4|Spon1|Emilin2|Adamts16|Col27a1	-1.633811104
BP	GO:0002703	regulation of leukocyte mediated immunity	19_GO:0002376 immune system process	-4.615398221	4.722584227	33	Adora2b|Arg1|Cd24a|Ccr2|Dnase1l3|Fgr|Cxcl1|H2-T10|H2-T22|Ifng|Igf2|Il1b|Lag3|Smad7|Tap1|Cd40|Tlr2|Sh2d1b1|Klrk1|Trp53bp1|Rsad2|Tnfsf13|Vsir|Shld2|Klrb1b|Il23a|Clec2d|Tlr3|Kmt5c|Klre1|Scimp|Tnfsfm13|Gm11127	-2.679883144
BP	GO:0002706	regulation of lymphocyte mediated immunity	19_GO:0002376 immune system process	-4.021770322	4.386193016	26	Arg1|Cd24a|Ccr2|H2-T10|H2-T22|Ifng|Igf2|Il1b|Lag3|Smad7|Tap1|Cd40|Sh2d1b1|Klrk1|Trp53bp1|Rsad2|Tnfsf13|Vsir|Shld2|Klrb1b|Il23a|Clec2d|Kmt5c|Klre1|Tnfsfm13|Gm11127	-2.229729988
BP	GO:0002697	regulation of immune effector process	19_GO:0002376 immune system process	-3.944840565	4.122044103	46	Adora2b|Cd5l|Arg1|Cd24a|Cfh|Ccr2|Ccr7|Dnase1l3|Fgl2|Fgr|Cxcl1|H2-T10|H2-T22|Ifng|Igf2|Il1b|Il2ra|Lag3|Lgals3|Smad7|Mif|Cd244a|Tap1|Cd40|Pglyrp1|Vpreb3|Tlr2|Sh2d1b1|Klrk1|Trp53bp1|Htra1|Rsad2|Tnfsf13|Vsir|Shld2|Il33|Klrb1b|Il23a|Clec2d|Rnf216|Tlr3|Kmt5c|Klre1|Scimp|Tnfsfm13|Gm11127	-2.175197582
BP	GO:0002285	lymphocyte activation involved in immune response	19_GO:0002376 immune system process	-3.771809195	4.187905868	26	Abl1|Ccr2|Ccr7|Fgl2|Ifng|Lgals1|Lgals3|Smad7|Clec4d|Cd244a|Psen2|Cd40|Pglyrp1|Ung|Gadd45g|Trp53bp1|Clec4e|Tnfsf13|Stx11|Shld2|Il23a|Dock10|Plcl2|Kmt5c|Gm13283|Tnfsfm13	-2.049986863
BP	GO:0002263	cell activation involved in immune response	19_GO:0002376 immune system process	-3.655718946	4.008180374	33	Abl1|Adora2b|Ccr2|Ccr7|Dnase1l3|Fgl2|Fgr|Ifng|Kit|Lgals1|Lgals3|Smad7|Clec4d|Cd244a|Psen2|Cd40|Pglyrp1|Ung|Gadd45g|Sh2d1b1|Trp53bp1|Clec4e|Tcim|Tnfsf13|Stx11|Shld2|Il33|Il23a|Dock10|Plcl2|Kmt5c|Gm13283|Tnfsfm13	-1.964420232
BP	GO:0002366	leukocyte activation involved in immune response	19_GO:0002376 immune system process	-3.432702856	3.842154816	32	Abl1|Adora2b|Ccr2|Ccr7|Dnase1l3|Fgl2|Fgr|Ifng|Kit|Lgals1|Lgals3|Smad7|Clec4d|Cd244a|Psen2|Cd40|Pglyrp1|Ung|Gadd45g|Sh2d1b1|Trp53bp1|Clec4e|Tnfsf13|Stx11|Shld2|Il33|Il23a|Dock10|Plcl2|Kmt5c|Gm13283|Tnfsfm13	-1.787136058
BP	GO:0002819	regulation of adaptive immune response	19_GO:0002376 immune system process	-3.377596508	3.865939696	26	Arg1|Cd24a|Cd44|Ccr2|Ccr7|H2-Ab1|H2-T10|H2-T22|Ifng|Il1b|Smad7|Mef2c|Mif|Cd40|Trp53bp1|Irf7|Rsad2|Cd274|Tnfsf13|Vsir|Shld2|Il33|Il23a|Kmt5c|Tnfsfm13|Gm11127	-1.745629083
BP	GO:0002705	positive regulation of leukocyte mediated immunity	19_GO:0002376 immune system process	-3.354043668	3.891459304	23	Adora2b|Arg1|Cd24a|Fgr|Cxcl1|H2-T10|H2-T22|Ifng|Il1b|Lag3|Cd40|Sh2d1b1|Klrk1|Trp53bp1|Rsad2|Tnfsf13|Shld2|Il23a|Kmt5c|Klre1|Scimp|Tnfsfm13|Gm11127	-1.724579389
BP	GO:0002821	positive regulation of adaptive immune response	19_GO:0002376 immune system process	-3.143955597	3.762285662	20	Cd24a|Cd44|Ccr2|Ccr7|H2-Ab1|H2-T10|H2-T22|Ifng|Il1b|Mif|Cd40|Trp53bp1|Rsad2|Cd274|Tnfsf13|Shld2|Il23a|Kmt5c|Tnfsfm13|Gm11127	-1.560996946
BP	GO:0002700	regulation of production of molecular mediator of immune response	19_GO:0002376 immune system process	-2.93471855	3.572580273	20	Arg1|Ccr2|Ifng|Il1b|Smad7|Mif|Cd244a|Cd40|Vpreb3|Tlr2|Trp53bp1|Rsad2|Tnfsf13|Vsir|Shld2|Il33|Tlr3|Kmt5c|Scimp|Tnfsfm13	-1.393763741
BP	GO:0002699	positive regulation of immune effector process	19_GO:0002376 immune system process	-2.863080119	3.395140345	29	Adora2b|Arg1|Cd24a|Ccr2|Ccr7|Fgr|Cxcl1|H2-T10|H2-T22|Ifng|Il1b|Lag3|Mif|Cd244a|Cd40|Tlr2|Sh2d1b1|Klrk1|Trp53bp1|Rsad2|Tnfsf13|Shld2|Il33|Il23a|Kmt5c|Klre1|Scimp|Tnfsfm13|Gm11127	-1.346534005
BP	GO:0045911	positive regulation of DNA recombination	19_GO:0048518 positive regulation of biological process	-2.834013724	3.87061296	9	Ifng|Timeless|Cd40|Wrn|Trp53bp1|Tnfsf13|Shld2|Kmt5c|Tnfsfm13	-1.325098163
BP	GO:0002822	regulation of adaptive immune response based on somatic recombination of immune receptors built from immunoglobulin superfamily domains	19_GO:0002376 immune system process	-2.789494321	3.394148188	23	Arg1|Cd24a|Ccr2|Ccr7|H2-Ab1|H2-T10|H2-T22|Ifng|Il1b|Smad7|Mef2c|Cd40|Trp53bp1|Rsad2|Cd274|Tnfsf13|Vsir|Shld2|Il33|Il23a|Kmt5c|Tnfsfm13|Gm11127	-1.291778952
BP	GO:0002708	positive regulation of lymphocyte mediated immunity	19_GO:0002376 immune system process	-2.698712251	3.38791877	18	Cd24a|H2-T10|H2-T22|Ifng|Il1b|Lag3|Cd40|Sh2d1b1|Klrk1|Trp53bp1|Rsad2|Tnfsf13|Shld2|Il23a|Kmt5c|Klre1|Tnfsfm13|Gm11127	-1.236372832
BP	GO:0045830	positive regulation of isotype switching	19_GO:0002376 immune system process	-2.658106721	3.848578472	7	Ifng|Cd40|Trp53bp1|Tnfsf13|Shld2|Kmt5c|Tnfsfm13	-1.202804195
BP	GO:0002443	leukocyte mediated immunity	19_GO:0002376 immune system process	-2.604396305	3.071902355	47	Adora2b|Arg1|Cd24a|Ccr2|Dnase1l3|Fas|Fgl2|Fgr|Cxcl1|Gzmb|H2-Ab1|H2-T10|H2-T22|Ifng|Igf2|Il1b|Kit|Klrd1|Lag3|Smad7|Prdx1|Pirb|Tap1|Cd40|Ung|Tlr2|Sh2d1b1|Klrk1|Trp53bp1|Irf7|Raet1d|Rsad2|Trem1|Tnfsf13|Vsir|Stx11|Shld2|Rftn1|Klrb1b|Il23a|Clec2d|Tlr3|Kmt5c|Klre1|Scimp|Tnfsfm13|Gm11127	-1.161977067
BP	GO:0002824	positive regulation of adaptive immune response based on somatic recombination of immune receptors built from immunoglobulin superfamily domains	19_GO:0002376 immune system process	-2.599038397	3.291344601	18	Cd24a|Ccr2|Ccr7|H2-Ab1|H2-T10|H2-T22|Ifng|Il1b|Cd40|Trp53bp1|Rsad2|Cd274|Tnfsf13|Shld2|Il23a|Kmt5c|Tnfsfm13|Gm11127	-1.158777149
BP	GO:0002702	positive regulation of production of molecular mediator of immune response	19_GO:0002376 immune system process	-2.32615248	3.098125887	14	Ifng|Il1b|Mif|Cd244a|Cd40|Tlr2|Trp53bp1|Rsad2|Tnfsf13|Shld2|Il33|Kmt5c|Scimp|Tnfsfm13	-0.974213989
BP	GO:0002312	B cell activation involved in immune response	19_GO:0002376 immune system process	-2.275443339	3.098897778	12	Abl1|Ifng|Lgals1|Cd40|Ung|Trp53bp1|Tnfsf13|Shld2|Dock10|Plcl2|Kmt5c|Tnfsfm13	-0.93818419
BP	GO:0002250	adaptive immune response	19_GO:0002376 immune system process	-2.214679636	2.716996499	50	Arg1|Arg2|Bach2|Cd24a|Cd44|Cd7|Ccr2|Ccr7|Fas|Fgl2|Gzmb|H2-Aa|H2-Ab1|H2-T10|H2-T22|Ifng|Il18bp|Il1b|Lag3|Smad7|Mef2c|Mif|Clec4d|Cd244a|Pirb|Serpina3g|Tap1|Cd40|Ung|Gadd45g|Sh2d1b1|Klrk1|Trp53bp1|Irf7|Clec4n|Rsad2|Pdcd1lg2|Cd274|Tnfsf13|Vsir|Stx11|Shld2|Rftn1|Il33|Il23a|Kmt5c|Tarm1|Gm13283|Tnfsfm13|Gm11127	-0.902974591
BP	GO:0002381	immunoglobulin production involved in immunoglobulin mediated immune response	19_GO:0002376 immune system process	-2.120894734	2.993949876	10	Fgl2|H2-Ab1|Ifng|Cd40|Ung|Trp53bp1|Tnfsf13|Shld2|Kmt5c|Tnfsfm13	-0.834079979
BP	GO:0002449	lymphocyte mediated immunity	19_GO:0002376 immune system process	-2.024929878	2.572879338	38	Arg1|Cd24a|Ccr2|Fas|Fgl2|Gzmb|H2-Ab1|H2-T10|H2-T22|Ifng|Igf2|Il1b|Klrd1|Lag3|Smad7|Prdx1|Pirb|Tap1|Cd40|Ung|Sh2d1b1|Klrk1|Trp53bp1|Irf7|Raet1d|Rsad2|Tnfsf13|Vsir|Stx11|Shld2|Rftn1|Klrb1b|Il23a|Clec2d|Kmt5c|Klre1|Tnfsfm13|Gm11127	-0.765444683
BP	GO:0002237	response to molecule of bacterial origin	19_GO:0051704 multi-organism process	-4.574624624	4.577240745	44	Abl1|Acp5|Cd24a|Ccr7|Gbp2|Gch1|Lilrb4a|Cxcl1|Cxcl10|Ifng|Il1b|Acod1|Ltf|Mef2c|Mif|Mrc1|Nfkb1|Nos2|Prkca|Ptger2|S100a8|S100a9|Cxcl2|Slpi|Scarb1|Plscr1|Cmpk2|Nr1h3|Vim|Tlr2|Klrk1|Cxcl11|Pdcd1lg2|Cd274|Cxcl16|Mtdh|Tab2|Ggt7|Pde2a|Trim41|Fcgr4|Scimp|Cxcl3|Gpr31b	-2.645791133
BP	GO:0032496	response to lipopolysaccharide	19_GO:0051704 multi-organism process	-4.155982038	4.30914855	41	Abl1|Acp5|Ccr7|Gbp2|Gch1|Lilrb4a|Cxcl1|Cxcl10|Ifng|Il1b|Acod1|Ltf|Mef2c|Mif|Mrc1|Nfkb1|Nos2|Prkca|Ptger2|S100a8|S100a9|Cxcl2|Slpi|Scarb1|Plscr1|Cmpk2|Nr1h3|Vim|Klrk1|Cxcl11|Pdcd1lg2|Cd274|Cxcl16|Mtdh|Tab2|Ggt7|Pde2a|Trim41|Fcgr4|Scimp|Cxcl3	-2.327361195
BP	GO:0071216	cellular response to biotic stimulus	19_GO:0050896 response to stimulus	-3.832015573	4.11442549	36	Abl1|Ddit3|Gbp2|Gch1|Lilrb4a|Cxcl1|Cxcl10|Ifng|Il1b|Acod1|Ltf|Mef2c|Mif|Mrc1|Nfkb1|Nos2|Prkca|Cxcl2|Plscr1|Cmpk2|Nr1h3|Vim|Tlr2|Klrk1|Cxcl11|Pdcd1lg2|Cd274|Cxcl16|Mtdh|Pde2a|Trim41|Fcgr4|Eme1|Tigar|Scimp|Cxcl3	-2.096604098
BP	GO:0071219	cellular response to molecule of bacterial origin	19_GO:0051704 multi-organism process	-3.519169145	3.901263446	33	Abl1|Gbp2|Gch1|Lilrb4a|Cxcl1|Cxcl10|Ifng|Il1b|Acod1|Ltf|Mef2c|Mif|Mrc1|Nfkb1|Nos2|Prkca|Cxcl2|Plscr1|Cmpk2|Nr1h3|Vim|Tlr2|Klrk1|Cxcl11|Pdcd1lg2|Cd274|Cxcl16|Mtdh|Pde2a|Trim41|Fcgr4|Scimp|Cxcl3	-1.857776101
BP	GO:0071222	cellular response to lipopolysaccharide	19_GO:0051704 multi-organism process	-3.459681675	3.863704769	32	Abl1|Gbp2|Gch1|Lilrb4a|Cxcl1|Cxcl10|Ifng|Il1b|Acod1|Ltf|Mef2c|Mif|Mrc1|Nfkb1|Nos2|Prkca|Cxcl2|Plscr1|Cmpk2|Nr1h3|Vim|Klrk1|Cxcl11|Pdcd1lg2|Cd274|Cxcl16|Mtdh|Pde2a|Trim41|Fcgr4|Scimp|Cxcl3	-1.808712096
BP	GO:0071396	cellular response to lipid	19_GO:0050896 response to stimulus	-2.991466804	3.36099739	56	Abl1|Cyp7b1|Eif4ebp1|Gbp2|Gch1|Lilrb4a|Gpld1|Nr3c1|Cxcl1|Hmga2|Id3|Cxcl10|Ifng|Il1b|Acod1|Lpl|Lrp6|Ltf|Mef2c|Mif|Mrc1|Nfkb1|Nos2|Padi2|Abcb4|Pim1|Prkca|Ptger2|Rock2|Cxcl2|Spp1|Trim24|Plscr1|Cmpk2|Nr1h3|Vim|Yes1|Map4k1|Klrk1|Cxcl11|Ramp3|Pdcd1lg2|Cd274|Cxcl16|Ddx17|Mtdh|Mgarp|Glrx|Nr3c2|Pde2a|Trim41|Fcgr4|Nrip1|Smo|Scimp|Cxcl3	-1.440212038
BP	GO:0017014	protein nitrosylation	19_GO:0008152 metabolic process	-4.559390839	6.188023002	7	Nos2|S100a8|S100a9|Snta1|Txn1|Ddah1|Atp2b4	-2.632211805
BP	GO:0006527	arginine catabolic process	19_GO:0008152 metabolic process	-3.863115975	5.931437571	5	Arg1|Arg2|Nos2|Ddah1|Atp2b4	-2.118903986
BP	GO:0018119	peptidyl-cysteine S-nitrosylation	19_GO:0008152 metabolic process	-3.707312185	5.37781854	6	Nos2|S100a8|S100a9|Snta1|Txn1|Atp2b4	-2.002641922
BP	GO:0009065	glutamine family amino acid catabolic process	19_GO:0008152 metabolic process	-3.594197635	5.007888636	7	Arg1|Arg2|Got1|Nos2|Asrgl1|Ddah1|Atp2b4	-1.91916071
BP	GO:0006525	arginine metabolic process	19_GO:0008152 metabolic process	-3.243576526	4.763270211	6	Arg1|Arg2|Ass1|Nos2|Ddah1|Atp2b4	-1.639166875
BP	GO:1901606	alpha-amino acid catabolic process	19_GO:0008152 metabolic process	-2.816368107	3.678316535	12	Arg1|Arg2|Got1|Nos2|Gcat|Asrgl1|Gcsh|Ddah1|Kmo|Csad|Ahcy|Atp2b4	-1.313088746
BP	GO:0009063	cellular amino acid catabolic process	19_GO:0008152 metabolic process	-2.644025771	3.460623034	13	Arg1|Arg2|Got1|Nos2|Gcat|Asrgl1|Gcsh|Ddah1|4930438A08Rik|Kmo|Csad|Ahcy|Atp2b4	-1.191760645
MF	GO:0016813	hydrolase activity, acting on carbon-nitrogen (but not peptide) bonds, in linear amidines		-2.550850049	4.298273851	4	Arg1|Arg2|Padi2|Ddah1	-1.128511262
BP	GO:0009064	glutamine family amino acid metabolic process	19_GO:0008152 metabolic process	-2.351904144	3.261854834	10	Arg1|Arg2|Ass1|Glul|Got1|Nos2|Slc7a11|Asrgl1|Ddah1|Atp2b4	-0.995995437
MF	GO:0050998	nitric-oxide synthase binding		-2.100596823	3.360296199	5	Arg2|Calm3|Nos2|Snta1|Atp2b4	-0.82054568
BP	GO:0000052	citrulline metabolic process	19_GO:0008152 metabolic process	-2.041598195	3.801951702	3	Ass1|Ddah1|Atp2b4	-0.777607555
BP	GO:0032768	regulation of monooxygenase activity	19_GO:0008152 metabolic process	-4.553644063	5.496591214	11	Gla|Arg2|Dhfr|Eng|Gch1|Ifng|Il1b|Nfkb1|S100a1|Scarb1|Atp2b4	-2.629755154
BP	GO:0050999	regulation of nitric-oxide synthase activity	19_GO:0008152 metabolic process	-4.060030836	5.227344651	9	Gla|Arg2|Dhfr|Eng|Gch1|Il1b|S100a1|Scarb1|Atp2b4	-2.25572148
BP	GO:0051341	regulation of oxidoreductase activity	19_GO:0008152 metabolic process	-3.90158687	4.551482693	16	Abl1|Gla|Arg2|Dhfr|Eng|Fxn|Gch1|Gzma|Ifng|Il1b|Nfkb1|S100a1|Scarb1|Prdx5|Atp2b4|Pdp2	-2.144218179
BP	GO:0032770	positive regulation of monooxygenase activity	19_GO:0048518 positive regulation of biological process	-2.657844375	3.98340164	6	Dhfr|Gch1|Ifng|Il1b|S100a1|Scarb1	-1.202804195
BP	GO:0051353	positive regulation of oxidoreductase activity	19_GO:0048518 positive regulation of biological process	-2.516907524	3.506735417	9	Abl1|Dhfr|Fxn|Gch1|Ifng|Il1b|S100a1|Scarb1|Pdp2	-1.102753563
BP	GO:0002320	lymphoid progenitor cell differentiation	19_GO:0002376 immune system process	-4.509304915	5.894650577	8	Flt3|Hes1|Kit|Sos1|Sox4|Nudt21|Fnip1|Ankle1	-2.59833278
BP	GO:0002328	pro-B cell differentiation	19_GO:0002376 immune system process	-4.309857503	6.173764818	6	Flt3|Hes1|Sos1|Sox4|Nudt21|Fnip1	-2.444165348
BP	GO:1905456	regulation of lymphoid progenitor cell differentiation	19_GO:0002376 immune system process	-3.863115975	5.931437571	5	Hes1|Sos1|Nudt21|Fnip1|Ankle1	-2.118903986
BP	GO:2000973	regulation of pro-B cell differentiation	19_GO:0002376 immune system process	-3.162338901	5.304980876	4	Hes1|Sos1|Nudt21|Fnip1	-1.577131956
BP	GO:1901532	regulation of hematopoietic progenitor cell differentiation	19_GO:0002376 immune system process	-2.298172343	3.499190527	6	Hes1|Sos1|Nudt21|Fnip1|Ankle1|N4bp2l2	-0.953203621
BP	GO:0051235	maintenance of location	19_GO:0051179 localization	-4.45793903	4.55123328	38	Abl1|Apoc4|Plin2|Bax|Tspo|Aspm|Capn3|Ddit3|Ehd1|Fth1|Gja1|Cxcl10|Il1b|Itpr2|Lck|Lcn2|Lgals1|Lgals3|Lpl|Plcg1|Srgn|Ryr1|Scin|Msr1|Soat1|Sqle|Scarb1|Tacc3|Txn1|Nr1h3|Aplnr|Sufu|Ikbke|Hilpda|Ubash3b|Gpsm2|Gsn|Nrip1	-2.55640845
BP	GO:0051493	regulation of cytoskeleton organization	19_GO:0071840 cellular component organization or biogenesis	-4.453857036	4.411867917	57	Abl1|Rhob|Bst1|Capg|Ccnf|Cdk5r1|Csf1r|Csf3|Ect2|Dmtn|Fscn1|Fgr|Gda|Itgb1bp1|Smad3|Mef2c|Map1b|Nek2|Pik3r1|Plk1|Prox1|Rock2|S100a10|Scin|Plk4|Tacc3|Tgfbr1|Tjp1|Tmod1|Vill|Tlr2|Nubp1|Bin1|Spag5|Arpc3|Rgcc|Ska1|Mid1ip1|Spire1|Rhobtb1|Arpin|Tpx2|Tppp|Rnd3|Gpsm2|Clasp2|Bicd2|Ckap2|Arhgef18|Mycbp2|Fchsd2|Rasa1|Gsn|Asap3|Ppp1r9a|Nav3|Prex1	-2.553880285
BP	GO:0097435	supramolecular fiber organization	19_GO:0071840 cellular component organization or biogenesis	-3.93338242	4.015679792	68	Abl1|Rhob|Anxa2|Capg|Capn3|Col1a2|Csf3|Csrp1|Cst3|Dmtn|Fscn1|Gda|Gfap|Itgb1bp1|Marcks|Smad3|Mef2c|Map1b|Myl2|Myo1b|Pcm1|Pik3r1|Prox1|Pstpip1|Rock2|S100a10|Scin|Tacc3|Tgfbr1|Tjp1|Tmod1|Vill|Vim|Coro1c|Tlr2|Msrb1|Bin1|Arpc3|Chp1|Fignl1|Rgcc|Tppp3|Mid1ip1|Spire1|Rhobtb1|Arpin|Tpx2|Tppp|Kif2c|Rnd3|Arhgap12|Clasp2|Ckap2|Arhgef18|Aif1l|Elmo1|Fchsd2|Adamts2|Rasa1|Gsn|Asap3|Gas2l3|Ppp1r9a|Nav3|Prex1|Kif1…	-2.168311
BP	GO:0030036	actin cytoskeleton organization	19_GO:0071840 cellular component organization or biogenesis	-3.879516795	3.98508387	66	Abl1|Rhob|Bst1|Capg|Capn3|Cdk5r1|Ccr7|Csf1r|Csf3|Csrp1|Ect2|Epb41l2|Dmtn|Fscn1|Fgr|Lpin1|S1pr2|Itgb1bp1|Kit|Marcks|Smad3|Mef2c|Myl2|Myo1b|Pdgfb|Pik3r1|Prox1|Pstpip1|Ran|Rock2|S100a10|S100a9|Scin|Tgfbr1|Tjp1|Tmod1|Vill|Fmnl3|Coro1c|Tlr2|Racgap1|Msrb1|Bin1|Arpc3|Rgcc|Pdlim7|Spire1|Anln|Rhobtb1|Arpin|Inf2|Rnd3|Arhgap12|Clasp2|Ophn1|Arhgef18|Aif1l|Elmo1|Fchsd2|Rasa1|Gsn|Asap3|Gas2l3|Ppp1r9a|Prex1|Tpm4	-2.126774562
MF	GO:0003779	actin binding		-3.790689438	4.016371193	45	Abl1|Macf1|Adssl1|Ang|Anxa8|Arc|Capg|Cdk5r1|Cxcr4|Epb41l2|Dmtn|Fscn1|Gcsam|Marcks|Map1b|Myl2|Myo1b|Nos2|Fxyd5|Pstpip1|S100a4|Scin|Snta1|Tmod1|Vill|Fmnl3|Coro1c|Msrb1|Bin1|Mefv|Arpc3|Pdlim7|Eps8l1|Spire1|Anln|Ppp1r42|Inf2|Clasp2|Ophn1|Aif1l|Mlph|Gsn|Gas2l3|Ppp1r9a|Tpm4	-2.061797035
BP	GO:0032956	regulation of actin cytoskeleton organization	19_GO:0071840 cellular component organization or biogenesis	-3.702614612	3.991865859	39	Abl1|Rhob|Bst1|Capg|Cdk5r1|Csf1r|Csf3|Ect2|Dmtn|Fscn1|Fgr|Itgb1bp1|Smad3|Mef2c|Pik3r1|Prox1|Rock2|S100a10|Scin|Tgfbr1|Tjp1|Tmod1|Vill|Tlr2|Bin1|Arpc3|Rgcc|Spire1|Rhobtb1|Arpin|Rnd3|Clasp2|Arhgef18|Fchsd2|Rasa1|Gsn|Asap3|Ppp1r9a|Prex1	-1.999918418
BP	GO:0030029	actin filament-based process	19_GO:0009987 cellular process	-3.397419239	3.630304363	70	Abl1|Rhob|Bst1|Capg|Capn3|Cdk5r1|Ccr7|Csf1r|Csf3|Csrp1|Ect2|Epb41l2|Dmtn|Fscn1|Fgr|Lpin1|Srgap2|Pdpn|S1pr2|Itgb1bp1|Jup|Kit|Marcks|Smad3|Mef2c|Myl2|Myo1b|Pdgfb|Pik3r1|Prox1|Pstpip1|Ran|Rock2|S100a10|S100a9|Scin|Snta1|Tgfbr1|Tjp1|Tmod1|Vill|Fmnl3|Coro1c|Tlr2|Racgap1|Msrb1|Bin1|Arpc3|Rgcc|Pdlim7|Spire1|Anln|Rhobtb1|Arpin|Inf2|Rnd3|Arhgap12|Clasp2|Ophn1|Arhgef18|Aif1l|Elmo1|Fchsd2|Rasa1|Gsn|Asap3|Ga…	-1.758773268
BP	GO:0110020	regulation of actomyosin structure organization	19_GO:0071840 cellular component organization or biogenesis	-3.293761966	3.999195807	16	Abl1|Ect2|Itgb1bp1|Smad3|Mef2c|Pik3r1|Prox1|Rock2|S100a10|Tgfbr1|Tjp1|Rgcc|Clasp2|Arhgef18|Asap3|Ppp1r9a	-1.675497716
BP	GO:0032970	regulation of actin filament-based process	19_GO:0050789 regulation of biological process	-3.188928205	3.580917057	41	Abl1|Rhob|Bst1|Capg|Cdk5r1|Csf1r|Csf3|Ect2|Dmtn|Fscn1|Fgr|Pdpn|Itgb1bp1|Jup|Smad3|Mef2c|Pik3r1|Prox1|Rock2|S100a10|Scin|Tgfbr1|Tjp1|Tmod1|Vill|Tlr2|Bin1|Arpc3|Rgcc|Spire1|Rhobtb1|Arpin|Rnd3|Clasp2|Arhgef18|Fchsd2|Rasa1|Gsn|Asap3|Ppp1r9a|Prex1	-1.596141757
BP	GO:0007015	actin filament organization	19_GO:0071840 cellular component organization or biogenesis	-3.130516613	3.523510453	43	Abl1|Rhob|Capg|Csf3|Dmtn|Fscn1|Itgb1bp1|Marcks|Smad3|Myo1b|Pik3r1|Prox1|Pstpip1|Rock2|S100a10|Scin|Tgfbr1|Tjp1|Tmod1|Vill|Coro1c|Tlr2|Msrb1|Bin1|Arpc3|Rgcc|Spire1|Rhobtb1|Arpin|Rnd3|Arhgap12|Clasp2|Arhgef18|Aif1l|Elmo1|Fchsd2|Rasa1|Gsn|Asap3|Gas2l3|Ppp1r9a|Prex1|Tpm4	-1.550537696
MF	GO:0051015	actin filament binding		-2.848221241	3.434599385	24	Abl1|Adssl1|Anxa8|Capg|Cdk5r1|Dmtn|Fscn1|Marcks|Myo1b|Pstpip1|Scin|Tmod1|Vill|Fmnl3|Coro1c|Bin1|Arpc3|Eps8l1|Clasp2|Aif1l|Gsn|Gas2l3|Ppp1r9a|Tpm4	-1.33614256
BP	GO:0090066	regulation of anatomical structure size	19_GO:0065007 biological regulation	-2.748288926	3.176611417	52	Abl1|Adora2a|Adora2b|Adra2a|Adra2b|Aqp4|Arhgap5|Capg|Cd38|Cdk5r1|Csf3|Dmtn|Fn1|Fxn|Gch1|Gja1|Hsp90aa1|Itgb1bp1|Kcnn4|Map1b|P2ry2|Pdgfb|Ptprm|Rgs2|Rock2|Scin|Sct|Snta1|Sod2|Tmod1|Vill|Mgll|Tlr2|Ulk2|Bin1|Arpc3|Aqp11|Spire1|Arpin|Inf2|Ist1|Clasp2|Slc12a6|Fchsd2|Sema6d|Rasa1|Gsn|Dock4|Ppp1r9a|Plxna4|Mtnr1b|Prex1	-1.264477003
BP	GO:1902903	regulation of supramolecular fiber organization	19_GO:0071840 cellular component organization or biogenesis	-2.66785132	3.17540202	36	Abl1|Capg|Csf3|Dmtn|Gda|Itgb1bp1|Smad3|Mef2c|Map1b|Pik3r1|Prox1|Rock2|S100a10|Scin|Tgfbr1|Tjp1|Tmod1|Vill|Tlr2|Bin1|Arpc3|Rgcc|Mid1ip1|Spire1|Arpin|Tpx2|Clasp2|Ckap2|Arhgef18|Fchsd2|Rasa1|Gsn|Asap3|Ppp1r9a|Nav3|Prex1	-1.208333838
BP	GO:0031032	actomyosin structure organization	19_GO:0071840 cellular component organization or biogenesis	-2.595106692	3.214607713	23	Abl1|Capn3|Csrp1|Ect2|Epb41l2|Itgb1bp1|Smad3|Mef2c|Myl2|Pik3r1|Prox1|Rock2|S100a10|Tgfbr1|Tjp1|Tmod1|Racgap1|Rgcc|Anln|Clasp2|Arhgef18|Asap3|Ppp1r9a	-1.155920431
BP	GO:0110053	regulation of actin filament organization	19_GO:0071840 cellular component organization or biogenesis	-2.494258228	3.072641803	28	Abl1|Capg|Csf3|Dmtn|Itgb1bp1|Smad3|Pik3r1|Rock2|S100a10|Scin|Tgfbr1|Tjp1|Tmod1|Vill|Tlr2|Bin1|Arpc3|Rgcc|Spire1|Arpin|Clasp2|Arhgef18|Fchsd2|Rasa1|Gsn|Asap3|Ppp1r9a|Prex1	-1.08763993
BP	GO:0051492	regulation of stress fiber assembly	19_GO:0071840 cellular component organization or biogenesis	-2.434256691	3.240209699	13	Abl1|Itgb1bp1|Smad3|Pik3r1|Rock2|S100a10|Tgfbr1|Tjp1|Rgcc|Clasp2|Arhgef18|Asap3|Ppp1r9a	-1.047116747
BP	GO:0032271	regulation of protein polymerization	19_GO:0071840 cellular component organization or biogenesis	-2.378249292	2.998054759	24	Abl1|Capg|Csf3|Dmtn|Gda|Hsp90aa1|Map1b|Scin|Tmod1|Vill|Tlr2|Bin1|Arpc3|Tppp3|Spire1|Arpin|Tppp|Clasp2|Fchsd2|Rasa1|Gsn|Ppp1r9a|Nav3|Prex1	-1.015641823
BP	GO:0051258	protein polymerization	19_GO:0071840 cellular component organization or biogenesis	-2.342990161	2.923763511	29	Abl1|Capg|Csf3|Dmtn|Gda|Hsp90aa1|Map1b|Pstpip1|Scin|Tmod1|Vill|Tlr2|Msrb1|Bin1|Arpc3|Tppp3|Mid1ip1|Spire1|Ube2c|Arpin|Tpx2|Tppp|Clasp2|Fchsd2|Rasa1|Gsn|Ppp1r9a|Nav3|Prex1	-0.988850476
BP	GO:0044089	positive regulation of cellular component biogenesis	19_GO:0071840 cellular component organization or biogenesis	-2.296813357	2.794678862	49	Abl1|Bax|Cd24a|Ccr7|Csf3|Epha2|Fscn1|Fas|Gda|Rack1|Hsp90aa1|Ifng|Itgb1bp1|Kit|Lgals3|Smad3|Map1b|Neurl1a|Pik3r1|Prkca|Prox1|Rock2|S100a10|Scin|Plk4|Sdc1|Tgfbr1|Adgre5|Bin1|Spag5|Arpc3|Rgcc|Cdt1|Eps8l1|Tppp3|Spire1|Anln|Arpin|P2ry12|Flrt3|Tppp|Atat1|Gpsm2|Clasp2|Fchsd2|Fnip1|Ice1|Gsn|Nav3	-0.952487757
BP	GO:0051017	actin filament bundle assembly	19_GO:0071840 cellular component organization or biogenesis	-2.214256321	2.89158797	19	Abl1|Dmtn|Fscn1|Itgb1bp1|Marcks|Smad3|Myo1b|Pik3r1|Rock2|S100a10|Tgfbr1|Tjp1|Rgcc|Spire1|Clasp2|Arhgef18|Aif1l|Asap3|Ppp1r9a	-0.902951364
BP	GO:0061572	actin filament bundle organization	19_GO:0071840 cellular component organization or biogenesis	-2.13517981	2.809977955	19	Abl1|Dmtn|Fscn1|Itgb1bp1|Marcks|Smad3|Myo1b|Pik3r1|Rock2|S100a10|Tgfbr1|Tjp1|Rgcc|Spire1|Clasp2|Arhgef18|Aif1l|Asap3|Ppp1r9a	-0.841891454
BP	GO:0043254	regulation of protein complex assembly	19_GO:0071840 cellular component organization or biogenesis	-2.027463236	2.562113262	42	Abl1|Bax|Capg|Cd24a|Csf3|Eif4ebp1|Dmtn|Fscn1|Fas|Gda|Rack1|Hes1|Hsp90aa1|Ifng|Lgals3|Map1b|Psen2|Scin|Tmod1|Vill|Tlr2|Bin1|Mefv|Arpc3|Pmepa1|Cdt1|Tppp3|Spire1|Arpin|P2ry12|Tppp|Atat1|Clasp2|Dut|Fchsd2|Fnip1|Ice1|Rasa1|Gsn|Ppp1r9a|Nav3|Prex1	-0.767044117
CC	GO:0032994	protein-lipid complex		-4.414051636	5.472053038	10	Apoc4|Apoc1|Apoc2|Gpld1|Lpl|Saa3|Msr1|Pla2g7|Bin1|Lsr	-2.529314851
CC	GO:0034358	plasma lipoprotein particle		-3.949606945	5.107120129	9	Apoc4|Apoc1|Apoc2|Gpld1|Lpl|Saa3|Msr1|Pla2g7|Lsr	-2.178813513
CC	GO:1990777	lipoprotein particle		-3.949606945	5.107120129	9	Apoc4|Apoc1|Apoc2|Gpld1|Lpl|Saa3|Msr1|Pla2g7|Lsr	-2.178813513
BP	GO:0097006	regulation of plasma lipoprotein particle levels	19_GO:0050789 regulation of biological process	-3.381180573	4.254366054	12	Apoc1|Apoc2|Anxa2|Ehd1|Gpld1|Lpl|Msr1|Soat1|Scarb1|Pla2g7|Mylip|Soat2	-1.74837555
BP	GO:0034381	plasma lipoprotein particle clearance	19_GO:0032501 multicellular organismal process	-3.01549256	4.171058946	8	Apoc1|Apoc2|Anxa2|Ehd1|Gpld1|Msr1|Scarb1|Mylip	-1.460749467
CC	GO:0034364	high-density lipoprotein particle		-2.468442173	3.729209827	6	Apoc4|Apoc1|Apoc2|Gpld1|Saa3|Pla2g7	-1.068250661
CC	GO:0034361	very-low-density lipoprotein particle		-2.391940069	3.787714965	5	Apoc4|Apoc1|Apoc2|Lpl|Lsr	-1.020696423
CC	GO:0034385	triglyceride-rich plasma lipoprotein particle		-2.391940069	3.787714965	5	Apoc4|Apoc1|Apoc2|Lpl|Lsr	-1.020696423
BP	GO:0010984	regulation of lipoprotein particle clearance	19_GO:0032501 multicellular organismal process	-2.288261013	3.635977431	5	Apoc1|Apoc2|Anxa2|Gpld1|Mylip	-0.949300414
CC	GO:0034362	low-density lipoprotein particle		-2.256114687	3.815331706	4	Apoc2|Msr1|Pla2g7|Lsr	-0.925177258
MF	GO:0045296	cadherin binding		-4.393726054	5.095822559	14	Arvcf|Ctnnd1|Cdh15|Cdk5r1|Jup|Ndrg1|Nos2|Numb|Fxyd5|Ppp1ca|Ptprm|Trpc4|Cdh23|Pkp3	-2.511974122
MF	GO:0035586	purinergic receptor activity		-4.356137271	5.71962627	8	Adora2a|Adora2b|P2ry2|Gpr34|P2ry12|Hcar2|P2ry14|Gpr171	-2.481758938
MF	GO:0001608	G protein-coupled nucleotide receptor activity		-3.408905212	5.270542913	5	P2ry2|Gpr34|P2ry12|P2ry14|Gpr171	-1.769340605
MF	GO:0045028	G protein-coupled purinergic nucleotide receptor activity		-3.408905212	5.270542913	5	P2ry2|Gpr34|P2ry12|P2ry14|Gpr171	-1.769340605
MF	GO:0001614	purinergic nucleotide receptor activity		-3.243576526	4.763270211	6	P2ry2|Gpr34|P2ry12|Hcar2|P2ry14|Gpr171	-1.639166875
MF	GO:0016502	nucleotide receptor activity		-3.243576526	4.763270211	6	P2ry2|Gpr34|P2ry12|Hcar2|P2ry14|Gpr171	-1.639166875
BP	GO:0002274	myeloid leukocyte activation	19_GO:0002376 immune system process	-4.338979338	4.563990863	30	Adora2b|Ccr2|Cst7|Dnase1l3|Fgr|Ifng|Kit|Cd200|Clec4d|Ndrg1|Cd244a|Pirb|Sphk1|Tgfbr2|Thbs1|Tnfsf9|Plscr1|Nr1h3|Tlr2|Klrk1|Mfhas1|Tslp|Stx11|Dcstamp|Il33|Tlr3|Pilrb1|Tmem106a|Fcgr4|Cd300lf	-2.467515744
BP	GO:0070848	response to growth factor	19_GO:0050896 response to stimulus	-4.307797532	4.291311466	62	Abl1|Acvr2b|Cd44|Cd63|Col1a2|E2f1|Egr1|Ehd1|Eng|Epha2|Fzd4|Gcnt2|Gdf3|Rack1|Got1|Nr3c1|Hes1|Hpgd|Itgb1bp1|Klf4|Smad3|Smad7|Mef2c|Cited2|Fam89b|Nfkb1|Pdgfb|Pgf|Plcg1|Rock2|Sh3gl2|Shcbp1|Sos1|Sparc|Sphk1|Zeb1|Tgfbr1|Tgfbr2|Thbs1|Dtymk|Tob1|Yes1|Spry1|Knstrn|Ramp2|Htra1|Smoc2|Pmepa1|Smurf2|Rgmb|Fam83g|Flrt3|Vsir|Kidins220|Htra3|Bcl9l|Fam20c|Peg10|Rasa1|Myof|Ofd1|Atp2b4	-2.443536333
BP	GO:0071363	cellular response to growth factor stimulus	19_GO:0050896 response to stimulus	-4.062537382	4.13368209	60	Abl1|Acvr2b|Cd44|Cd63|Col1a2|E2f1|Egr1|Ehd1|Eng|Fzd4|Gcnt2|Gdf3|Rack1|Got1|Nr3c1|Hes1|Hpgd|Itgb1bp1|Klf4|Smad3|Smad7|Mef2c|Cited2|Fam89b|Nfkb1|Pdgfb|Pgf|Plcg1|Sh3gl2|Shcbp1|Sos1|Sparc|Sphk1|Zeb1|Tgfbr1|Tgfbr2|Thbs1|Dtymk|Tob1|Yes1|Spry1|Knstrn|Ramp2|Htra1|Smoc2|Pmepa1|Smurf2|Rgmb|Fam83g|Flrt3|Vsir|Kidins220|Htra3|Bcl9l|Fam20c|Peg10|Rasa1|Myof|Ofd1|Atp2b4	-2.255732073
BP	GO:0071559	response to transforming growth factor beta	19_GO:0050896 response to stimulus	-2.682911814	3.284473312	24	Col1a2|Eng|Gcnt2|Got1|Nr3c1|Hpgd|Smad3|Smad7|Mef2c|Cited2|Fam89b|Rock2|Zeb1|Tgfbr1|Tgfbr2|Thbs1|Yes1|Spry1|Htra1|Pmepa1|Smurf2|Htra3|Bcl9l|Peg10	-1.22170337
BP	GO:0017015	regulation of transforming growth factor beta receptor signaling pathway	19_GO:0023052 signaling	-2.631195828	3.388246233	15	Eng|Got1|Smad3|Smad7|Cited2|Fam89b|Zeb1|Thbs1|Spry1|Htra1|Pmepa1|Smurf2|Htra3|Bcl9l|Peg10	-1.181138048
BP	GO:0007179	transforming growth factor beta receptor signaling pathway	19_GO:0023052 signaling	-2.556154096	3.217040823	20	Col1a2|Eng|Gcnt2|Got1|Hpgd|Smad3|Smad7|Cited2|Fam89b|Zeb1|Tgfbr1|Tgfbr2|Thbs1|Spry1|Htra1|Pmepa1|Smurf2|Htra3|Bcl9l|Peg10	-1.131225591
BP	GO:1903844	regulation of cellular response to transforming growth factor beta stimulus	19_GO:0050896 response to stimulus	-2.555428689	3.311605066	15	Eng|Got1|Smad3|Smad7|Cited2|Fam89b|Zeb1|Thbs1|Spry1|Htra1|Pmepa1|Smurf2|Htra3|Bcl9l|Peg10	-1.131019364
BP	GO:0071560	cellular response to transforming growth factor beta stimulus	19_GO:0050896 response to stimulus	-2.489709169	3.115116411	23	Col1a2|Eng|Gcnt2|Got1|Nr3c1|Hpgd|Smad3|Smad7|Mef2c|Cited2|Fam89b|Zeb1|Tgfbr1|Tgfbr2|Thbs1|Yes1|Spry1|Htra1|Pmepa1|Smurf2|Htra3|Bcl9l|Peg10	-1.085078492
BP	GO:0090287	regulation of cellular response to growth factor stimulus	19_GO:0050896 response to stimulus	-2.341661275	2.929551792	28	Abl1|Cd63|Eng|Fzd4|Gdf3|Got1|Hes1|Smad3|Smad7|Cited2|Fam89b|Pdgfb|Zeb1|Thbs1|Tob1|Spry1|Htra1|Smoc2|Pmepa1|Smurf2|Vsir|Htra3|Bcl9l|Fam20c|Peg10|Myof|Ofd1|Atp2b4	-0.988370484
BP	GO:0034113	heterotypic cell-cell adhesion	19_GO:0022610 biological adhesion	-4.255052934	5.110724872	12	Cd2|Cd44|Gcnt2|Il1b|Il1rn|Itga5|Itgax|Itgb7|Jup|Klf4|Lck|Cd200	-2.404847799
BP	GO:0034114	regulation of heterotypic cell-cell adhesion	19_GO:0022610 biological adhesion	-2.560536298	3.852992874	6	Cd44|Gcnt2|Il1b|Il1rn|Klf4|Lck	-1.132290487
BP	GO:0034116	positive regulation of heterotypic cell-cell adhesion	19_GO:0022610 biological adhesion	-2.130445216	3.609807294	4	Cd44|Gcnt2|Il1b|Lck	-0.841356663
BP	GO:0014009	glial cell proliferation	19_GO:0008283 cell proliferation	-4.255052934	5.110724872	12	Areg|Tspo|Csf1r|E2f1|Fas|Gfap|Hes1|Ifng|Il1b|Sox4|Vim|Il33	-2.404847799
BP	GO:0042063	gliogenesis	19_GO:0032502 developmental process	-4.004308431	4.224614504	38	Abl1|Adora2a|Areg|Tspo|Cdk5r1|Cxcr4|Ccr2|Csf1r|E2f1|Erbb3|Fas|Fn1|Srgap2|Gfap|Adgrg1|Hes1|Hmga2|Ifng|Il1b|Lrp6|Ndrg1|Nfix|Pdgfb|Pou3f1|Qk|S100a8|S100a9|Sox4|Trpc4|Vim|Tlr2|Bin1|P2ry12|Tppp|Il33|Gpr37l1|Dner|Smo	-2.215882219
BP	GO:0048708	astrocyte differentiation	19_GO:0032502 developmental process	-3.330880701	4.107176626	14	Abl1|Adora2a|Gfap|Hes1|Hmga2|Ifng|Il1b|Nfix|S100a8|S100a9|Vim|Bin1|Gpr37l1|Smo	-1.705556533
BP	GO:0014002	astrocyte development	19_GO:0032502 developmental process	-2.852369979	3.978835188	8	Adora2a|Gfap|Ifng|Il1b|S100a8|S100a9|Vim|Smo	-1.338135402
BP	GO:0060251	regulation of glial cell proliferation	19_GO:0008283 cell proliferation	-2.775308831	3.887525018	8	Tspo|E2f1|Fas|Gfap|Hes1|Ifng|Il1b|Vim	-1.280043649
BP	GO:0010001	glial cell differentiation	19_GO:0032502 developmental process	-2.481609257	3.077648481	26	Abl1|Adora2a|Cxcr4|Erbb3|Gfap|Hes1|Hmga2|Ifng|Il1b|Lrp6|Ndrg1|Nfix|Pdgfb|Pou3f1|Qk|S100a8|S100a9|Sox4|Trpc4|Vim|Tlr2|Bin1|Tppp|Gpr37l1|Dner|Smo	-1.078463349
BP	GO:0060252	positive regulation of glial cell proliferation	19_GO:0008283 cell proliferation	-2.288261013	3.635977431	5	Tspo|E2f1|Gfap|Il1b|Vim	-0.949300414
BP	GO:0014015	positive regulation of gliogenesis	19_GO:0048518 positive regulation of biological process	-2.158671557	2.968828441	12	Tspo|Cxcr4|Ccr2|E2f1|Gfap|Hes1|Il1b|Qk|Vim|Tlr2|Bin1|P2ry12	-0.857641561
BP	GO:0021782	glial cell development	19_GO:0032502 developmental process	-2.024798048	2.770594999	14	Adora2a|Gfap|Ifng|Il1b|Ndrg1|Pdgfb|Pou3f1|S100a8|S100a9|Sox4|Vim|Tlr2|Tppp|Smo	-0.765444683
BP	GO:0002220	innate immune response activating cell surface receptor signaling pathway	19_GO:0002376 immune system process	-4.246140787	7.045238743	4	Fcnb|Tlr2|Klrk1|Klre1	-2.398693086
MF	GO:0038187	pattern recognition receptor activity		-2.760875968	4.121126695	6	Fcnb|Scarb1|Pglyrp1|Tlr2|Clec4e|Trim5	-1.270470075
BP	GO:0010884	positive regulation of lipid storage	19_GO:0051179 localization	-4.211552219	5.554180068	8	Apoc4|Plin2|Ehd1|Lpl|Msr1|Scarb1|Ikbke|Hilpda	-2.369135007
BP	GO:0010878	cholesterol storage	19_GO:0051179 localization	-3.540356933	5.15672764	6	Ehd1|Lpl|Msr1|Soat1|Scarb1|Nr1h3	-1.873557663
BP	GO:0010886	positive regulation of cholesterol storage	19_GO:0051179 localization	-3.442637239	5.765617827	4	Ehd1|Lpl|Msr1|Scarb1	-1.79447246
BP	GO:0019915	lipid storage	19_GO:0051179 localization	-3.022083696	3.846068517	13	Apoc4|Plin2|Ehd1|Il1b|Lpl|Msr1|Soat1|Sqle|Scarb1|Nr1h3|Ikbke|Hilpda|Nrip1	-1.465055067
BP	GO:0010885	regulation of cholesterol storage	19_GO:0051179 localization	-2.894491369	4.520770982	5	Ehd1|Lpl|Msr1|Scarb1|Nr1h3	-1.367558046
BP	GO:0010883	regulation of lipid storage	19_GO:0051179 localization	-2.766722232	3.79405419	9	Apoc4|Plin2|Ehd1|Lpl|Msr1|Scarb1|Nr1h3|Ikbke|Hilpda	-1.273893491
BP	GO:0055088	lipid homeostasis	19_GO:0065007 biological regulation	-2.410380621	3.104934373	18	Apoc4|Fabp4|Apoc2|Cd24a|Cyp7b1|Ehd1|Fabp3|Got1|Lpl|Abcb4|Soat1|Scarb1|Nr1h3|Usf2|Angptl4|Hdac9|Mylip|Soat2	-1.028447539
BP	GO:0042632	cholesterol homeostasis	19_GO:0065007 biological regulation	-2.158671557	2.968828441	12	Fabp4|Cd24a|Cyp7b1|Ehd1|Fabp3|Lpl|Soat1|Scarb1|Nr1h3|Hdac9|Mylip|Soat2	-0.857641561
BP	GO:0055092	sterol homeostasis	19_GO:0065007 biological regulation	-2.121176075	2.926602746	12	Fabp4|Cd24a|Cyp7b1|Ehd1|Fabp3|Lpl|Soat1|Scarb1|Nr1h3|Hdac9|Mylip|Soat2	-0.834079979
CC	GO:0005938	cell cortex		-4.198965007	4.386146331	36	Macf1|Rhob|Anxa2|Ctnnd1|Ctbp2|Ect2|Eno1|Epb41l2|Dmtn|Itpr2|Marcks|Melk|Nos2|Psen2|Pstpip1|Ryr1|Tmod1|Trpc4|Usp2|Spire1|Anln|Rhobtb1|Sapcd2|Rnd3|Exoc6b|Gpsm2|Clasp2|Exoc8|Nr3c2|Mlph|Gsn|Cytip|Ppp1r9a|Tpm4|Eno1b|Kncn	-2.363713585
CC	GO:0099738	cell cortex region		-3.03815347	4.023789759	10	Ctnnd1|Ctbp2|Eno1|Epb41l2|Anln|Sapcd2|Gpsm2|Clasp2|Nr3c2|Eno1b	-1.478778906
CC	GO:0044448	cell cortex part		-2.401528816	3.041585077	22	Ctnnd1|Ctbp2|Eno1|Epb41l2|Dmtn|Nos2|Pstpip1|Tmod1|Trpc4|Anln|Sapcd2|Exoc6b|Gpsm2|Clasp2|Exoc8|Nr3c2|Mlph|Gsn|Ppp1r9a|Tpm4|Eno1b|Kncn	-1.021473767
BP	GO:0001935	endothelial cell proliferation	19_GO:0008283 cell proliferation	-4.173615191	4.590312874	22	Adora2b|Ang|Arg1|Ecm1|Eng|Epha2|Gja1|Igf2|Itgb1bp1|Mef2c|Pdgfb|Pgf|Prkca|Plcg1|Prox1|Ptprm|Sparc|Scarb1|Tgfbr1|Thbs1|Aplnr|Rgcc	-2.342354252
BP	GO:0001936	regulation of endothelial cell proliferation	19_GO:0008283 cell proliferation	-3.453764795	4.059536347	19	Adora2b|Ang|Arg1|Ecm1|Eng|Gja1|Igf2|Mef2c|Pdgfb|Pgf|Prkca|Plcg1|Prox1|Ptprm|Sparc|Tgfbr1|Thbs1|Aplnr|Rgcc	-1.8041434
BP	GO:0050673	epithelial cell proliferation	19_GO:0008283 cell proliferation	-3.130516613	3.523510453	43	Adora2b|Ang|Birc5|Areg|Arg1|Bax|Fabp7|Cyp7b1|Ecm1|Eng|Epha2|Eya1|Gja1|Glul|Hes1|Hmga2|Ifng|Igf2|Igfbp5|Itgb1bp1|Kit|Lrp6|Smad3|Mef2c|Nme1|Nme2|Uhrf1|Pdgfb|Pgf|Prkca|Plcg1|Prox1|Ptprm|Sparc|Scarb1|Tgfbr1|Thbs1|Aplnr|Htra1|Rgcc|Aqp11|Tcf19|Smo	-1.550537696
BP	GO:0050678	regulation of epithelial cell proliferation	19_GO:0008283 cell proliferation	-2.375103004	2.918460507	35	Adora2b|Ang|Birc5|Arg1|Bax|Cyp7b1|Ecm1|Eng|Eya1|Gja1|Glul|Hes1|Hmga2|Ifng|Igf2|Lrp6|Smad3|Mef2c|Nme1|Nme2|Uhrf1|Pdgfb|Pgf|Prkca|Plcg1|Prox1|Ptprm|Sparc|Tgfbr1|Thbs1|Aplnr|Htra1|Rgcc|Aqp11|Smo	-1.012945348
BP	GO:0001937	negative regulation of endothelial cell proliferation	19_GO:0008283 cell proliferation	-2.366216073	3.395800522	8	Eng|Gja1|Mef2c|Ptprm|Sparc|Tgfbr1|Thbs1|Rgcc	-1.006747555
BP	GO:0032611	interleukin-1 beta production	19_GO:0032501 multicellular organismal process	-4.13164818	4.755030219	16	Acp5|Aqp4|Arg2|Ccr7|Egr1|Ifi204|Ifng|Il1b|Lpl|Smad3|Sphk1|Tlr2|Mefv|Ffar4|Tmem106a|Ifi205	-2.306957631
BP	GO:0032651	regulation of interleukin-1 beta production	19_GO:0032501 multicellular organismal process	-3.66673675	4.425794026	14	Acp5|Aqp4|Arg2|Ccr7|Egr1|Ifi204|Ifng|Lpl|Smad3|Sphk1|Tlr2|Mefv|Ffar4|Ifi205	-1.97326298
BP	GO:0032612	interleukin-1 production	19_GO:0032501 multicellular organismal process	-3.637232471	4.279229424	17	Acp5|Aqp4|Arg2|Ccr7|Egr1|Ifi204|Ifng|Il1b|Il1r2|Lpl|Smad3|Sphk1|Tlr2|Mefv|Ffar4|Tmem106a|Ifi205	-1.951910374
BP	GO:0032652	regulation of interleukin-1 production	19_GO:0032501 multicellular organismal process	-3.23272756	3.975292808	15	Acp5|Aqp4|Arg2|Ccr7|Egr1|Ifi204|Ifng|Il1r2|Lpl|Smad3|Sphk1|Tlr2|Mefv|Ffar4|Ifi205	-1.632012069
BP	GO:0032620	interleukin-17 production	19_GO:0032501 multicellular organismal process	-3.125465687	4.198879204	9	Arg2|Ddit3|Ifng|Osm|Sphk1|Tlr2|Vsir|Rftn1|Il23a	-1.548007234
BP	GO:0032660	regulation of interleukin-17 production	19_GO:0032501 multicellular organismal process	-3.101935678	4.272410034	8	Arg2|Ddit3|Ifng|Osm|Sphk1|Tlr2|Vsir|Il23a	-1.534397387
BP	GO:0032700	negative regulation of interleukin-17 production	19_GO:0048519 negative regulation of biological process	-2.391940069	3.787714965	5	Arg2|Ddit3|Ifng|Tlr2|Vsir	-1.020696423
CC	GO:0048471	perinuclear region of cytoplasm		-4.121291504	4.157882139	64	Abl1|Anxa4|Prdx6|Apod|Bax|Bub1b|Anxa2|Cdk5r1|Cdkn1a|Cst3|Ddx4|Ddx6|Ehd1|Dmtn|Fas|Gbp2|Rack1|Hsp90aa1|Itgb1bp1|Map1b|Myo1b|Ndrg1|Nme1|Nme2|Nos2|Pik3r1|Prkca|Psen2|Ptprm|Rad51|S100a4|S100a6|Sh3gl2|Spp1|Stc2|Aurka|Tpd52|Plscr1|Vim|Clic4|Usp2|Slc5a3|Prdx5|Mad2l1|Fignl1|Ptges|Aqp11|Mtdh|Tppp3|Pclaf|Inf2|Cdkn3|Wdr44|Tppp|Tmem192|Cdc20|Npy|Mlph|Pde2a|Galnt6|Creb3l2|Gsn|Rasgrp3|Prex1	-2.300495998
BP	GO:0140013	meiotic nuclear division	19_GO:0022414 reproductive process	-4.096107943	4.462929358	25	Bub1|Bub1b|Aspm|Ccne1|Cdc25b|Ddx4|Fanca|Hspa2|Osm|Plk1|Psmc3ip|Rad51|Aurka|Ttk|Psmd13|Piwil2|Fignl1|Nuf2|Spire1|Syce2|Sgo1|Tex15|Cdc20|Chtf18|Eme1	-2.27788986
BP	GO:1903046	meiotic cell cycle process	19_GO:0022414 reproductive process	-3.453177637	3.943192889	25	Bub1|Bub1b|Aspm|Ccne1|Cdc25b|Ddx4|Fanca|Hspa2|Osm|Plk1|Psmc3ip|Rad51|Aurka|Ttk|Psmd13|Piwil2|Fignl1|Nuf2|Spire1|Syce2|Sgo1|Tex15|Cdc20|Chtf18|Eme1	-1.8041434
BP	GO:0007127	meiosis I	19_GO:0022414 reproductive process	-2.445967945	3.199587753	15	Ccne1|Cdc25b|Ddx4|Hspa2|Plk1|Psmc3ip|Rad51|Aurka|Psmd13|Piwil2|Syce2|Sgo1|Tex15|Chtf18|Eme1	-1.05596136
BP	GO:0061982	meiosis I cell cycle process	19_GO:0022414 reproductive process	-2.274028065	3.020230256	15	Ccne1|Cdc25b|Ddx4|Hspa2|Plk1|Psmc3ip|Rad51|Aurka|Psmd13|Piwil2|Syce2|Sgo1|Tex15|Chtf18|Eme1	-0.937617148
BP	GO:0001780	neutrophil homeostasis	19_GO:0002376 immune system process	-4.074739666	5.397401737	8	Cd44|Cfh|Ccr2|Lilrb4a|Ifng|Mertk|Slc7a11|Hcar2	-2.262899003
BP	GO:0006925	inflammatory cell apoptotic process	19_GO:0009987 cellular process	-2.38111754	3.611451187	6	Cd44|Fas|Ifng|Mef2c|Slc7a11|Hcar2	-1.017212825
BP	GO:0001781	neutrophil apoptotic process	19_GO:0002376 immune system process	-2.256114687	3.815331706	4	Cd44|Ifng|Slc7a11|Hcar2	-0.925177258
BP	GO:0045066	regulatory T cell differentiation	19_GO:0002376 immune system process	-4.060030836	5.227344651	9	Cd44|Ctla2a|Fanca|Ifng|Il2rg|Lag3|Lck|Pla2g2d|Vsir	-2.25572148
BP	GO:0045589	regulation of regulatory T cell differentiation	19_GO:0002376 immune system process	-3.704379474	4.971631188	8	Cd44|Ctla2a|Fanca|Ifng|Il2rg|Lag3|Lck|Vsir	-2.000697367
BP	GO:0002361	CD4-positive, CD25-positive, alpha-beta regulatory T cell differentiation	19_GO:0002376 immune system process	-2.041598195	3.801951702	3	Ifng|Il2rg|Pla2g2d	-0.777607555
BP	GO:0043087	regulation of GTPase activity	19_GO:0065007 biological regulation	-3.968535483	4.226437012	35	Ccr7|Ect2|Epha2|Evi5|Srgap2|Rack1|Itgb1bp1|S100a10|Ccl6|Ccl7|Ccl9|Cd40|Vav2|Coro1c|Spry1|Bin1|Net1|Rgl3|Tbc1d5|Arhgap12|Sh3bp4|Dock9|Arap3|Prom2|Dock10|Rasa1|Asap3|Adap1|Arhgap22|Rasgrp3|Plxna4|Prex1|Sbf2|Rasal3|Arhgef26	-2.192483488
BP	GO:0051345	positive regulation of hydrolase activity	19_GO:0065007 biological regulation	-3.151419711	3.508170217	50	Ang|Apoc2|Bax|Ccr7|Ect2|Efna1|Epha2|Evi5|Fas|Srgap2|Rack1|Hspa2|Ifng|Lck|Smad3|Mef2c|Cd200|Psme2|Rock2|S100a10|S100a8|S100a9|Ccl6|Ccl7|Ccl9|Cd40|Plscr1|Nr1h3|Wrn|Coro1c|Bin1|Mefv|Net1|Mtch2|Prelid1|Rgl3|Tbc1d5|Vsir|Dnajb1|Dock9|Arap3|Dock10|Rasa1|Gpr55|Gsn|Acer2|Asap3|Arhgap22|Prex1|Arhgef26	-1.566963492
BP	GO:0043547	positive regulation of GTPase activity	19_GO:0065007 biological regulation	-2.526426471	3.13905654	24	Ccr7|Ect2|Epha2|Evi5|Srgap2|Rack1|S100a10|Ccl6|Ccl7|Ccl9|Cd40|Coro1c|Bin1|Net1|Rgl3|Tbc1d5|Dock9|Arap3|Dock10|Rasa1|Asap3|Arhgap22|Prex1|Arhgef26	-1.11024072
BP	GO:0045445	myoblast differentiation	19_GO:0032502 developmental process	-3.957685136	4.601357579	16	Capn3|Ddit3|Gdf3|Id3|Cxcl10|Lgals1|Mef2c|Pik3r1|Ccl9|Sdc1|Tnfsf14|Mbnl1|Cxcl14|Asb2|Ddx17|Nmrk2	-2.184581621
BP	GO:0045661	regulation of myoblast differentiation	19_GO:0032502 developmental process	-2.933975364	3.850579646	11	Capn3|Ddit3|Gdf3|Id3|Cxcl10|Mef2c|Pik3r1|Ccl9|Tnfsf14|Cxcl14|Nmrk2	-1.393698611
BP	GO:0045662	negative regulation of myoblast differentiation	19_GO:0048519 negative regulation of biological process	-2.743014322	3.954992711	7	Ddit3|Gdf3|Id3|Cxcl10|Ccl9|Cxcl14|Nmrk2	-1.261862372
BP	GO:0003158	endothelium development	19_GO:0032502 developmental process	-3.943384511	4.482298215	19	Acvr2b|Rhob|Cxcr4|Eng|Pdpn|S1pr2|Cxcl10|Il1b|Itgax|Pdgfb|Prox1|Rock2|Zeb1|Tgfbr1|Tjp1|Tjp3|Clic4|Pde2a|Arhgef26	-2.174888938
BP	GO:0045446	endothelial cell differentiation	19_GO:0032502 developmental process	-2.709300789	3.466536363	15	Acvr2b|Cxcr4|Eng|Pdpn|S1pr2|Il1b|Prox1|Rock2|Zeb1|Tgfbr1|Tjp1|Tjp3|Clic4|Pde2a|Arhgef26	-1.244690544
BP	GO:0030855	epithelial cell differentiation	19_GO:0032502 developmental process	-2.577639402	3.0274079	54	Abl1|Acvr2b|Ctnnd1|Cd63|Cdkn1c|Cxcr4|Eng|Epha2|Eya1|Gdf3|Gja1|Pdpn|S1pr2|Hes1|Id3|Ifng|Il1b|Klf4|Smad3|Mef2c|Nme2|Numb|Pdgfb|Abcb1a|Pou3f1|Prox1|Rock2|Sox4|Plk4|Tagln2|Zeb1|Tgfbr1|Tjp1|Tmod1|Upk1b|Cdh23|Vim|Spry1|Tjp3|Clic4|Whrn|Gpsm2|Rilpl2|Fam20c|Ophn1|Cep152|Jmjd1c|Mcoln3|Pde2a|Adamtsl4|Ajap1|Smo|Tigar|Arhgef26	-1.143603724
BP	GO:0051098	regulation of binding	19_GO:0065007 biological regulation	-3.93609561	4.142645878	42	Abl1|Bax|Anxa2|Cdkn1a|Csf3|Ctbp2|Ddit3|E2f1|Eno1|Rack1|Gzma|Hes1|Ifit2|Ifng|Itgb1bp1|Klf4|Smad3|Nek2|Nme1|Pdgfb|Plk1|Psen2|Ran|S100a10|Slpi|Aurkb|Aurka|Tgfbr1|Plscr1|Txn1|Ramp2|Cdt1|Cdca5|Ubash3b|Hopx|Plcl2|Plcl1|Niban2|Trib3|Mepce|Spon1|Smo	-2.168744424
BP	GO:0043393	regulation of protein binding	19_GO:0065007 biological regulation	-2.307126518	2.929124681	24	Abl1|Bax|Anxa2|Cdkn1a|Csf3|Rack1|Ifit2|Itgb1bp1|Pdgfb|Plk1|Psen2|Ran|Slpi|Aurkb|Aurka|Tgfbr1|Plscr1|Ramp2|Ubash3b|Hopx|Plcl2|Plcl1|Trib3|Spon1	-0.958603121
BP	GO:0051383	kinetochore organization	19_GO:0071840 cellular component organization or biogenesis	-3.873097494	5.349829682	7	Cenpa|Cenpk|Cenpw|Nuf2|Ndc80|Cdt1|Cenpn	-2.124753218
BP	GO:0034508	centromere complex assembly	19_GO:0071840 cellular component organization or biogenesis	-2.924882186	4.181797923	7	Cenpa|Hells|Cenpk|Cenpw|Oip5|Cenpn|Cenpi	-1.388651683
BP	GO:0032682	negative regulation of chemokine production	19_GO:0048519 negative regulation of biological process	-3.873097494	5.349829682	7	Apod|Arg2|Cd24a|Epha2|Klf4|Sigirr|Mefv	-2.124753218
CC	GO:0043209	myelin sheath		-3.853339901	4.237183783	27	Ass1|Anxa2|Calm3|Ehd1|Eno1|Fscn1|Gfap|Glul|Gnb4|Hspa2|Hsp90aa1|Itpr2|Mif|Mdh2|Ndrg1|Nme1|Nme2|Cldn11|Prdx1|Pkm|Sod2|Ubc|Atp5o|Car13|Tppp|Gsn|Cnrip1	-2.112922857
BP	GO:0019882	antigen processing and presentation	19_GO:0002376 immune system process	-3.790408956	4.38180032	18	Ccr7|Ctse|Fgl2|Flt3|H2-Aa|H2-Ab1|H2-DMb2|H2-T10|H2-T22|Ifng|Psmb8|Psme2|Tap1|Thbs1|Ifi30|Rab32|Rftn1|Gm11127	-2.061797035
BP	GO:0002504	antigen processing and presentation of peptide or polysaccharide antigen via MHC class II	19_GO:0002376 immune system process	-2.870219209	4.266965787	6	Ctse|H2-Aa|H2-Ab1|H2-DMb2|Thbs1|Ifi30	-1.352259577
BP	GO:0019886	antigen processing and presentation of exogenous peptide antigen via MHC class II	19_GO:0002376 immune system process	-2.753166891	4.314809487	5	Ctse|H2-Aa|H2-Ab1|H2-DMb2|Ifi30	-1.268163487
BP	GO:0019884	antigen processing and presentation of exogenous antigen	19_GO:0002376 immune system process	-2.498983289	3.64804434	7	Ctse|H2-Aa|H2-Ab1|H2-DMb2|Psme2|Tap1|Ifi30	-1.091367758
BP	GO:0002478	antigen processing and presentation of exogenous peptide antigen	19_GO:0002376 immune system process	-2.38111754	3.611451187	6	Ctse|H2-Aa|H2-Ab1|H2-DMb2|Tap1|Ifi30	-1.017212825
BP	GO:0002495	antigen processing and presentation of peptide antigen via MHC class II	19_GO:0002376 immune system process	-2.191384679	3.493863051	5	Ctse|H2-Aa|H2-Ab1|H2-DMb2|Ifi30	-0.885642581
CC	GO:0032133	chromosome passenger complex		-3.789838487	6.329488805	4	Birc5|Aurkb|Aurka|Cdca8	-2.061797035
BP	GO:0051256	mitotic spindle midzone assembly	19_GO:0071840 cellular component organization or biogenesis	-2.450098002	4.594024657	3	Aurkb|Racgap1|Prc1	-1.05865097
CC	GO:0051233	spindle midzone		-2.352602959	3.462041005	7	Plk1|Aurkb|Aurka|Racgap1|Cdca8|Ttc28|Prc1	-0.996250868
BP	GO:0000022	mitotic spindle elongation	19_GO:0071840 cellular component organization or biogenesis	-2.226420272	4.158851146	3	Aurkb|Racgap1|Prc1	-0.91028977
BP	GO:0051231	spindle elongation	19_GO:0071840 cellular component organization or biogenesis	-2.041598195	3.801951702	3	Aurkb|Racgap1|Prc1	-0.777607555
BP	GO:0070098	chemokine-mediated signaling pathway	19_GO:0023052 signaling	-3.786141116	4.655266273	12	Cxcr4|Ccr1|Cxcl1|Cxcl10|Padi2|Ccl6|Ccl7|Ccl9|Cxcl2|Cxcl11|Gpr35|Cxcl3	-2.061122068
MF	GO:0008009	chemokine activity		-3.724611105	4.754723983	10	Cxcl1|Cxcl10|Ccl6|Ccl7|Ccl9|Cxcl2|Cxcl11|Cxcl14|Cxcl16|Cxcl3	-2.013964219
BP	GO:1990868	response to chemokine	19_GO:0050896 response to stimulus	-3.140499453	4.011719558	12	Cxcr4|Ccr1|Cxcl1|Cxcl10|Padi2|Ccl6|Ccl7|Ccl9|Cxcl2|Cxcl11|Gpr35|Cxcl3	-1.559033225
BP	GO:1990869	cellular response to chemokine	19_GO:0050896 response to stimulus	-3.140499453	4.011719558	12	Cxcr4|Ccr1|Cxcl1|Cxcl10|Padi2|Ccl6|Ccl7|Ccl9|Cxcl2|Cxcl11|Gpr35|Cxcl3	-1.559033225
MF	GO:0045236	CXCR chemokine receptor binding		-2.894491369	4.520770982	5	Cxcl1|Cxcl10|Cxcl2|Cxcl11|Cxcl3	-1.367558046
BP	GO:0002548	monocyte chemotaxis	19_GO:0040011 locomotion	-2.242367513	3.184039078	9	Ccr1|Ccr2|Cxcl10|Lgals3|Pdgfb|Ccl6|Ccl7|Ccl9|Pla2g7	-0.914764415
BP	GO:0071674	mononuclear cell migration	19_GO:0040011 locomotion	-2.235787617	3.054960911	12	Ccr1|Ccr2|Ccr7|Csf1r|Cxcl10|Lgals3|Pdgfb|Ccl6|Ccl7|Ccl9|Thbs1|Pla2g7	-0.911081206
MF	GO:0030246	carbohydrate binding		-3.769272564	4.106655343	32	Cd24a|Cd69|Cd72|Chil3|Eng|Fcnb|Klrd1|Lgals1|Lgals3|Cd93|Clec4d|Mrc1|Sell|Klrk1|Pfkp|Clec4e|Clec4n|Cd209f|Cd209g|Klrg2|Ganc|Pkd1l2|Klrb1b|Clec2d|Prg4|Olr1|Egln3|Cd209e|Galnt6|Klre1|Layn|Klri2	-2.048478148
BP	GO:0046597	negative regulation of viral entry into host cell	19_GO:0051704 multi-organism process	-3.729296701	5.173635375	7	Fcnb|Trim26|Ifitm3|Trim59|Ifitm1|Ifitm2|Gsn	-2.014619211
BP	GO:0046596	regulation of viral entry into host cell	19_GO:0051704 multi-organism process	-2.766722232	3.79405419	9	Fcnb|Lgals1|Trim26|Ifitm3|Trim59|Ifitm1|Ifitm2|Gsn|Trim5	-1.273893491
BP	GO:0034340	response to type I interferon	19_GO:0002376 immune system process	-2.366216073	3.395800522	8	Irf7|Ikbke|Zbp1|Ifitm3|Ifitm1|Ifitm2|Setd2|Isg15	-1.006747555
MF	GO:0044389	ubiquitin-like protein ligase binding		-3.724992073	4.033363085	36	Prdx6|Cdkn1a|Cxcr4|Erbb3|Flt3|Fzd4|H2-Ab1|Herc2|Hsp90aa1|Smad3|Smad7|Abcb1a|Pik3r1|Polr2a|Hltf|Aurka|Tgfbr1|Cd40|Tpi1|Traf1|Traf5|Ubc|Mfhas1|Usp2|Ikbke|Rad18|Rpl23|Ube2t|Sncaip|Ube2c|Ubash3b|Cul9|Sumo2|Trib3|Ccnb1|Isg15	-2.013964219
MF	GO:0031625	ubiquitin protein ligase binding		-3.552284917	3.917982039	34	Prdx6|Cdkn1a|Cxcr4|Erbb3|Flt3|Fzd4|H2-Ab1|Herc2|Hsp90aa1|Smad3|Smad7|Abcb1a|Pik3r1|Polr2a|Hltf|Aurka|Tgfbr1|Cd40|Tpi1|Traf1|Traf5|Ubc|Mfhas1|Usp2|Ikbke|Rad18|Rpl23|Ube2t|Sncaip|Ubash3b|Cul9|Sumo2|Trib3|Isg15	-1.882757087
MF	GO:0050840	extracellular matrix binding		-3.714589537	4.585011403	12	Anxa2|Ecm1|Adgrg1|Rpsa|Lgals1|Lgals3|Sparc|Spp1|Tgfbi|Thbs1|Smoc2|Itga9	-2.007095642
MF	GO:0005518	collagen binding		-2.55966762	3.44844793	11	Ctsk|Adgrg1|Smad3|Smad7|Pdgfb|Srgn|Sparc|Tgfbi|Thbs1|Vwf|Itga9	-1.132290487
MF	GO:0043236	laminin binding		-2.003851709	3.096624659	6	Ecm1|Rpsa|Lgals1|Lgals3|Thbs1|Itga9	-0.752234969
MF	GO:0019976	interleukin-2 binding		-3.692678701	6.929435659	3	Il2ra|Il2rb|Il2rg	-1.992926889
CC	GO:1903143	adrenomedullin receptor complex		-3.692678701	6.929435659	3	Ramp2|Calcrl|Ramp3	-1.992926889
MF	GO:0001605	adrenomedullin receptor activity		-3.110162586	5.876220327	3	Ramp2|Calcrl|Ramp3	-1.539728987
BP	GO:1990410	adrenomedullin receptor signaling pathway	19_GO:0023052 signaling	-3.110162586	5.876220327	3	Ramp2|Calcrl|Ramp3	-1.539728987
CC	GO:1903439	calcitonin family receptor complex		-2.731705881	5.14417927	3	Ramp2|Calcrl|Ramp3	-1.256207659
CC	GO:0038037	G protein-coupled receptor dimeric complex		-2.226420272	4.158851146	3	Ramp2|Calcrl|Ramp3	-0.91028977
MF	GO:0097642	calcitonin family receptor activity		-2.226420272	4.158851146	3	Ramp2|Calcrl|Ramp3	-0.91028977
BP	GO:0097646	calcitonin family receptor signaling pathway	19_GO:0023052 signaling	-2.226420272	4.158851146	3	Ramp2|Calcrl|Ramp3	-0.91028977
BP	GO:0036005	response to macrophage colony-stimulating factor	19_GO:0050896 response to stimulus	-3.621448213	5.580155009	5	Csf1r|Pde1b|Tlr2|Dcstamp|Pde2a	-1.942699346
BP	GO:0036006	cellular response to macrophage colony-stimulating factor stimulus	19_GO:0050896 response to stimulus	-3.621448213	5.580155009	5	Csf1r|Pde1b|Tlr2|Dcstamp|Pde2a	-1.942699346
MF	GO:0004115	3',5'-cyclic-AMP phosphodiesterase activity		-2.39531027	4.043205276	4	Pde1b|Pde3b|Pde7b|Pde2a	-1.020696423
MF	GO:0050543	icosatetraenoic acid binding		-3.621448213	5.580155009	5	Fabp3|S100a8|S100a9|Stx3|Gpr31b	-1.942699346
MF	GO:0036041	long-chain fatty acid binding		-3.110694138	4.586854216	6	Fabp4|Fabp3|S100a8|S100a9|Stx3|Gpr31b	-1.539728987
BP	GO:0070486	leukocyte aggregation	19_GO:0022610 biological adhesion	-2.753166891	4.314809487	5	Adam8|Cd44|Il1b|S100a8|S100a9	-1.268163487
MF	GO:0050544	arachidonic acid binding		-2.726547466	4.587021985	4	S100a8|S100a9|Stx3|Gpr31b	-1.256207659
MF	GO:0050542	icosanoid binding		-2.550850049	4.298273851	4	S100a8|S100a9|Stx3|Gpr31b	-1.128511262
MF	GO:0035662	Toll-like receptor 4 binding		-2.450098002	4.594024657	3	S100a8|S100a9|Saa3	-1.05865097
MF	GO:1901567	fatty acid derivative binding		-2.424302753	3.553352117	7	S100a8|S100a9|Soat1|Stx3|Acot7|Soat2|Gpr31b	-1.040483481
MF	GO:0035325	Toll-like receptor binding		-2.016158034	3.422926675	4	S100a8|S100a9|Saa3|Tlr2	-0.76157685
BP	GO:0018105	peptidyl-serine phosphorylation	19_GO:0008152 metabolic process	-3.544010258	3.894219121	36	Bax|Cd44|Cdk1|Cdc7|Cdk5r1|Csf3|Dmtn|Rack1|Hsp90aa1|Ifng|Smad7|Mif|Osm|Pdgfb|Prkca|Plk1|Rock2|Aurkb|Aurka|Tgfbr1|Tgfbr2|Ttk|Txn1|Map3k12|Map4k1|Pbk|Ramp3|Ikbke|Fnip1|Plcl2|Plcl1|Smg1|Ccnb1|Atp2b4|Brsk1|Gm13283	-1.876303371
BP	GO:0018209	peptidyl-serine modification	19_GO:0008152 metabolic process	-2.9366979	3.405155002	36	Bax|Cd44|Cdk1|Cdc7|Cdk5r1|Csf3|Dmtn|Rack1|Hsp90aa1|Ifng|Smad7|Mif|Osm|Pdgfb|Prkca|Plk1|Rock2|Aurkb|Aurka|Tgfbr1|Tgfbr2|Ttk|Txn1|Map3k12|Map4k1|Pbk|Ramp3|Ikbke|Fnip1|Plcl2|Plcl1|Smg1|Ccnb1|Atp2b4|Brsk1|Gm13283	-1.394512125
BP	GO:0018107	peptidyl-threonine phosphorylation	19_GO:0008152 metabolic process	-2.024798048	2.770594999	14	Cdk1|Cdk5r1|Dmtn|S1pr2|Smad7|Prkca|Plk1|Rock2|Sphk1|Tgfbr1|Tgfbr2|Ttk|Map3k12|Pbk	-0.765444683
BP	GO:0002831	regulation of response to biotic stimulus	19_GO:0050896 response to stimulus	-3.521925893	4.072761172	21	Arg1|Arg2|Cd24a|Fgl2|Cxcl1|Ifng|Il1b|Il2ra|Acod1|Ltf|Mif|Prkca|Tlr2|Klrk1|Htra1|Cd274|Il23a|Rnf216|Klre1|Tigar|Scimp	-1.858738241
BP	GO:0002833	positive regulation of response to biotic stimulus	19_GO:0048518 positive regulation of biological process	-2.504363541	3.43497344	10	Arg1|Cd24a|Cxcl1|Acod1|Mif|Prkca|Tlr2|Klrk1|Cd274|Scimp	-1.093150946
BP	GO:0031664	regulation of lipopolysaccharide-mediated signaling pathway	19_GO:0051704 multi-organism process	-2.288261013	3.635977431	5	Acod1|Ltf|Mif|Prkca|Scimp	-0.949300414
BP	GO:0002832	negative regulation of response to biotic stimulus	19_GO:0048519 negative regulation of biological process	-2.032978588	3.049092915	7	Arg2|Fgl2|Il2ra|Acod1|Ltf|Htra1|Klre1	-0.771134383
BP	GO:0002526	acute inflammatory response	19_GO:0050896 response to stimulus	-3.513300392	4.138582316	18	Adam8|Adra2a|Cd5l|Cfh|Ccr7|Dnase1l3|Fn1|Cxcl1|Il1b|Il1rn|Mif|Orm1|Pla2g2d|Saa3|Serpina3n|Plscr1|Sigirr|Trem1	-1.852801879
BP	GO:0006953	acute-phase response	19_GO:0050896 response to stimulus	-2.629351531	3.71355386	8	Fn1|Il1b|Il1rn|Orm1|Saa3|Serpina3n|Plscr1|Sigirr	-1.17984384
BP	GO:0050764	regulation of phagocytosis	19_GO:0051179 localization	-3.494795322	4.151615225	17	Ccr7|Fgr|Rack1|Ifng|Il1b|Il2rb|Il2rg|Mertk|Sphk1|Scarb1|Tlr2|Cd300lf|Sirpb1a|Gm5150|Sirpb1b|Gm9733|Sirpb1c	-1.836305171
BP	GO:0030100	regulation of endocytosis	19_GO:0051179 localization	-2.90745965	3.408490751	32	Apoc2|Arc|Anxa2|Cd63|Ccr7|Fgr|Rack1|Ifng|Il1b|Il2rb|Il2rg|Lgals3|Mertk|Numb|Prkca|Sh3gl2|Sphk1|Scarb1|Nr1h3|Tlr2|Bin1|Tbc1d5|Ophn1|Bmp2k|Prom2|Cd300lf|Sirpb1a|Gm5150|Sirpb1b|Gm9733|Sirpb1c|Rubcn	-1.374572463
BP	GO:0050766	positive regulation of phagocytosis	19_GO:0051179 localization	-2.441825019	3.280828897	12	Ccr7|Ifng|Il1b|Il2rb|Il2rg|Mertk|Cd300lf|Sirpb1a|Gm5150|Sirpb1b|Gm9733|Sirpb1c	-1.052297523
BP	GO:0006897	endocytosis	19_GO:0051179 localization	-2.045205194	2.534607532	62	Abl1|Apoc2|Arc|Anxa2|Cd24a|Cd63|Ccr2|Ccr7|Ehd1|Fcnb|Fgr|Rack1|Ifng|Il1b|Il2rb|Il2rg|Lgals3|Lrp6|Mertk|Mrc1|Nme1|Numb|Prkca|Pstpip1|Msr1|Itsn2|Sh3gl2|Sphk1|Scarb1|Tgfbr2|Tgm2|Thbs1|Nr1h3|Coro1c|Tlr2|Bin1|Ramp2|Calcrl|Ramp3|Cxcl16|Ifitm3|Rhobtb1|Tbc1d5|Fcho1|Arhgap12|Ophn1|Slc9b2|Sh3bp4|Elmo1|Bmp2k|Cd209e|Prom2|Fchsd2|Gsn|Rhov|Cd300lf|Sirpb1a|Gm5150|Sirpb1b|Gm9733|Sirpb1c|Rubcn	-0.777607555
BP	GO:0010718	positive regulation of epithelial to mesenchymal transition	19_GO:0048518 positive regulation of biological process	-3.474871617	4.491304707	10	Eng|Gcnt2|Pdpn|Il1b|Smad3|Tgfbr1|Tgfbr2|Rgcc|Bcl9l|Glipr2	-1.820583754
BP	GO:0010717	regulation of epithelial to mesenchymal transition	19_GO:0032502 developmental process	-2.890564984	3.677300697	14	Efna1|Eng|Gcnt2|Pdpn|Il1b|Smad3|Smad7|Tgfbr1|Tgfbr2|Spry1|Rgcc|Clasp2|Bcl9l|Glipr2	-1.36494373
BP	GO:0048762	mesenchymal cell differentiation	19_GO:0032502 developmental process	-2.451329929	3.068021123	24	Efna1|Efnb1|Eng|Gcnt2|Gja1|Pdpn|Hes1|Il1b|Lrp6|Smad3|Smad7|Mef2c|Cited2|Tgfbr1|Tgfbr2|Coro1c|Spry1|Rgcc|Ddx17|Clasp2|Bcl9l|Sema6d|Smo|Glipr2	-1.05865097
BP	GO:0001837	epithelial to mesenchymal transition	19_GO:0032502 developmental process	-2.291900071	3.001240621	17	Efna1|Eng|Gcnt2|Gja1|Pdpn|Il1b|Lrp6|Smad3|Smad7|Tgfbr1|Tgfbr2|Spry1|Rgcc|Ddx17|Clasp2|Bcl9l|Glipr2	-0.949300414
BP	GO:0051129	negative regulation of cellular component organization	19_GO:0048519 negative regulation of biological process	-3.45949049	3.675527187	70	Birc5|Apoc2|Apod|Bub1|Bub1b|Tspo|Capg|Ccnf|Cd38|Cdk5r1|Efna1|Eif4ebp1|Dmtn|Fxn|Gfap|Rack1|Hes1|Hspa2|Cxcl10|Il1b|Itgb1bp1|Lgals1|Lgals3|Mcm2|Map1b|Nek2|Osm|Plk1|Psen2|Rock2|Scin|Aurkb|Tjp1|Tmod1|Ttk|Nr1h3|Vill|Vim|Coro1c|Tlr2|Nubp1|Ulk2|Mefv|Mad2l1|Huwe1|Pmepa1|Rgcc|Prelid1|Ndc80|Cdt1|Mid1ip1|Spdl1|Arpin|Tpx2|Clasp2|Ckap2|Dnajb1|Arhgef18|Prom2|Sema6d|Mylip|Gsn|Rtn4rl1|Ppp1r9a|Cd300lf|Nav3|Ccnb1|T…	-1.808712096
BP	GO:0022411	cellular component disassembly	19_GO:0071840 cellular component organization or biogenesis	-3.147830588	3.55982131	39	Bax|Tspo|Capg|Cd24a|Cdk1|Dnase1l3|Eng|Dmtn|Fscn1|Pdpn|Hspa2|Map1b|Padi2|Plk1|Scin|Sh3gl2|Tgfbr1|Tmod1|Vill|Ets1|Huwe1|Rpl23|Fundc2|Mid1ip1|Noxo1|Tpx2|2810006K23Rik|Kif2c|Clasp2|Ckap2|Exoc8|Gsn|Nav3|Eif5a|Kif19a|Tigar|Gfm2|Parl|Rubcn	-1.564123799
BP	GO:0010639	negative regulation of organelle organization	19_GO:0048519 negative regulation of biological process	-2.653251767	3.14221798	40	Birc5|Bub1|Bub1b|Tspo|Capg|Ccnf|Dmtn|Fxn|Mcm2|Map1b|Nek2|Osm|Plk1|Scin|Aurkb|Tjp1|Tmod1|Ttk|Vill|Tlr2|Nubp1|Mad2l1|Huwe1|Rgcc|Prelid1|Ndc80|Cdt1|Mid1ip1|Spdl1|Arpin|Tpx2|Clasp2|Ckap2|Arhgef18|Gsn|Ppp1r9a|Nav3|Ccnb1|Tigar|Parl	-1.199323738
BP	GO:0043242	negative regulation of protein complex disassembly	19_GO:0048519 negative regulation of biological process	-2.557866686	3.370730505	13	Capg|Dmtn|Map1b|Scin|Tmod1|Vill|Mid1ip1|Tpx2|Clasp2|Ckap2|Gsn|Nav3|Rubcn	-1.132290487
BP	GO:1901880	negative regulation of protein depolymerization	19_GO:0048519 negative regulation of biological process	-2.52995864	3.375753517	12	Capg|Dmtn|Map1b|Scin|Tmod1|Vill|Mid1ip1|Tpx2|Clasp2|Ckap2|Gsn|Nav3	-1.111731547
BP	GO:0051494	negative regulation of cytoskeleton organization	19_GO:0048519 negative regulation of biological process	-2.52681377	3.188723519	20	Capg|Ccnf|Dmtn|Map1b|Nek2|Scin|Tjp1|Tmod1|Vill|Tlr2|Nubp1|Mid1ip1|Arpin|Tpx2|Clasp2|Ckap2|Arhgef18|Gsn|Ppp1r9a|Nav3	-1.11024072
BP	GO:0051014	actin filament severing	19_GO:0009987 cellular process	-2.503269621	3.950354791	5	Capg|Srgap2|Scin|Vill|Gsn	-1.093150946
BP	GO:0043624	cellular protein complex disassembly	19_GO:0071840 cellular component organization or biogenesis	-2.232263557	2.939518944	17	Capg|Dmtn|Map1b|Scin|Sh3gl2|Tmod1|Vill|Mid1ip1|Tpx2|2810006K23Rik|Kif2c|Clasp2|Ckap2|Gsn|Nav3|Eif5a|Kif19a	-0.91028977
BP	GO:0051261	protein depolymerization	19_GO:0071840 cellular component organization or biogenesis	-2.145254042	2.882846717	15	Capg|Dmtn|Map1b|Scin|Sh3gl2|Tmod1|Vill|Mid1ip1|Tpx2|Kif2c|Clasp2|Ckap2|Gsn|Nav3|Kif19a	-0.848871376
MF	GO:0004861	cyclin-dependent protein serine/threonine kinase inhibitor activity		-3.408905212	5.270542913	5	Cdkn1a|Cdkn1c|Cdkn2c|Cdkn2d|Hexim1	-1.769340605
BP	GO:0007050	cell cycle arrest	19_GO:0048519 negative regulation of biological process	-2.172942606	2.894086824	16	Cdk5r1|Cdkn1a|Cdkn1c|Cdkn2c|Cdkn2d|Ddit3|Ifng|Smad3|Mif|Slfn1|Sox4|Thbs1|Bin1|Rpl23|Rgcc|Cdkn3	-0.86956295
MF	GO:0019210	kinase inhibitor activity		-2.142638644	3.064581659	9	Cdkn1a|Cdkn1c|Cdkn2c|Cdkn2d|Rack1|Lrp6|Chp1|Hexim1|Trib3	-0.848197803
BP	GO:0072697	protein localization to cell cortex	19_GO:0051179 localization	-3.408905212	5.270542913	5	Epb41l2|Plk1|Nubp1|Sapcd2|Gpsm2	-1.769340605
BP	GO:1904776	regulation of protein localization to cell cortex	19_GO:0051179 localization	-2.92775371	4.91836685	4	Epb41l2|Plk1|Sapcd2|Gpsm2	-1.390178642
MF	GO:0001730	2'-5'-oligoadenylate synthetase activity		-3.408905212	5.270542913	5	Oas1g|Oasl2|Oasl1|Oas3|Oas1a	-1.769340605
BP	GO:0060700	regulation of ribonuclease activity	19_GO:0008152 metabolic process	-2.894491369	4.520770982	5	Oas1g|Oasl2|Oasl1|Oas3|Oas1a	-1.367558046
MF	GO:0003725	double-stranded RNA binding		-2.39902587	3.234384089	12	Vim|Oas1g|Oasl2|Zfp346|Mbnl1|Zbp1|Mtdh|Rftn1|Tlr3|Oasl1|Oas3|Oas1a	-1.020696423
BP	GO:0032069	regulation of nuclease activity	19_GO:0008152 metabolic process	-2.38111754	3.611451187	6	Gzma|Oas1g|Oasl2|Oasl1|Oas3|Oas1a	-1.017212825
MF	GO:1990782	protein tyrosine kinase binding		-3.387340794	4.085818917	16	Angpt2|Anxa5|Cd2|Gja1|Rack1|Nr3c1|Hsp90aa1|Itgax|Blnk|Pik3r1|Plcg1|Tob1|Clasp2|Rasa1|Dock4|Bank1	-1.751854711
MF	GO:0030971	receptor tyrosine kinase binding		-2.463090044	3.342431115	11	Angpt2|Anxa5|Cd2|Rack1|Nr3c1|Itgax|Pik3r1|Plcg1|Tob1|Rasa1|Dock4	-1.06387888
BP	GO:0060192	negative regulation of lipase activity	19_GO:0065007 biological regulation	-3.386339793	4.95261813	6	Abl1|Anxa8|Apoc1|Rgs2|Angptl4|Hdac9	-1.751854711
BP	GO:0051004	regulation of lipoprotein lipase activity	19_GO:0065007 biological regulation	-2.623266795	4.125432277	5	Apoc1|Apoc2|Nr1h3|Angptl4|Hdac9	-1.176100297
BP	GO:0051005	negative regulation of lipoprotein lipase activity	19_GO:0065007 biological regulation	-2.226420272	4.158851146	3	Apoc1|Angptl4|Hdac9	-0.91028977
BP	GO:0010519	negative regulation of phospholipase activity	19_GO:0065007 biological regulation	-2.041598195	3.801951702	3	Abl1|Anxa8|Rgs2	-0.777607555
MF	GO:0005160	transforming growth factor beta receptor binding		-3.346719002	4.703586471	7	Cd44|Eng|Smad3|Smad7|Tgfbr1|Tgfbr2|Smurf2	-1.718085908
BP	GO:0070723	response to cholesterol	19_GO:0050896 response to stimulus	-3.110694138	4.586854216	6	F7|Gpld1|Lrp6|Tgfbr1|Tgfbr2|Smo	-1.539728987
BP	GO:0061323	cell proliferation involved in heart morphogenesis	19_GO:0008283 cell proliferation	-2.870219209	4.266965787	6	Eng|Eya1|Hes1|Lrp6|Pim1|Tgfbr2	-1.352259577
BP	GO:1905007	positive regulation of epithelial to mesenchymal transition involved in endocardial cushion formation	19_GO:0048518 positive regulation of biological process	-2.731705881	5.14417927	3	Eng|Tgfbr1|Tgfbr2	-1.256207659
BP	GO:0036314	response to sterol	19_GO:0050896 response to stimulus	-2.657844375	3.98340164	6	F7|Gpld1|Lrp6|Tgfbr1|Tgfbr2|Smo	-1.202804195
BP	GO:2000826	regulation of heart morphogenesis	19_GO:0032502 developmental process	-2.24717912	3.249921214	8	Eng|Eya1|Hes1|Lrp6|Pim1|Tgfbr1|Tgfbr2|Smo	-0.917912056
BP	GO:2000136	regulation of cell proliferation involved in heart morphogenesis	19_GO:0008283 cell proliferation	-2.191384679	3.493863051	5	Eng|Eya1|Hes1|Lrp6|Pim1	-0.885642581
MF	GO:0048185	activin binding		-2.130445216	3.609807294	4	Acvr2b|Smad7|Tgfbr1|Tgfbr2	-0.841356663
BP	GO:0003143	embryonic heart tube morphogenesis	19_GO:0032502 developmental process	-2.120894734	2.993949876	10	Eng|Gja1|Hes1|Lrp6|Smad3|Mef2c|Cited2|Tgfbr2|Sufu|Smo	-0.834079979
MF	GO:0005114	type II transforming growth factor beta receptor binding		-2.041598195	3.801951702	3	Cd44|Eng|Tgfbr1	-0.777607555
BP	GO:0062043	positive regulation of cardiac epithelial to mesenchymal transition	19_GO:0048518 positive regulation of biological process	-2.041598195	3.801951702	3	Eng|Tgfbr1|Tgfbr2	-0.777607555
BP	GO:1905005	regulation of epithelial to mesenchymal transition involved in endocardial cushion formation	19_GO:0032502 developmental process	-2.041598195	3.801951702	3	Eng|Tgfbr1|Tgfbr2	-0.777607555
BP	GO:0060412	ventricular septum morphogenesis	19_GO:0032502 developmental process	-2.03044104	2.979995024	8	Hes1|Lrp6|Smad7|Cited2|Prox1|Sox4|Tgfbr1|Tgfbr2	-0.769616014
CC	GO:0045177	apical part of cell		-3.337659221	3.675783803	45	Anxa4|Birc5|Cacnb3|Aspm|Cd44|Erbb3|Fas|Fn1|Gja1|Pdpn|Hsp90aa1|Kcnn4|Myo1b|Numb|P2ry2|Pcm1|Abcb4|Abcb1a|Prkca|Pld1|Psen2|Spp1|Stx3|Tgfbr1|Tjp1|Upk1b|Cdh23|Slc7a11|Tjp3|Clic4|Akr1a1|Ifitm3|Mtdh|Cyp4f18|Sapcd2|Gpsm2|Slc16a3|Slco2b1|Arhgef18|Slc12a6|Prom2|Slc39a14|Slc4a11|Slc26a9|Kncn	-1.710683741
CC	GO:0016323	basolateral plasma membrane		-2.850849481	3.393657251	28	Aqp4|Anxa2|Cd38|Entpd1|Cd44|Erbb3|Pdpn|Hpgd|Hsp90aa1|Kcnn4|Numb|P2ry2|Pdgfb|Slc1a3|Tgfbr1|Tjp1|Trpc4|Aqp9|P2ry12|Slc16a3|Slc9b2|Slco2b1|Itga9|Slc12a6|Slc39a14|Ajap1|Slc4a11|Atp2b4	-1.338135402
CC	GO:0016324	apical plasma membrane		-2.501412859	3.039000792	34	Anxa4|Birc5|Cacnb3|Aspm|Cd44|Erbb3|Fas|Fn1|Gja1|Pdpn|Hsp90aa1|Kcnn4|Numb|P2ry2|Abcb4|Abcb1a|Pld1|Psen2|Stx3|Tgfbr1|Tjp1|Upk1b|Tjp3|Akr1a1|Mtdh|Cyp4f18|Slc16a3|Slco2b1|Slc12a6|Prom2|Slc39a14|Slc4a11|Slc26a9|Kncn	-1.092050934
BP	GO:0050798	activated T cell proliferation	19_GO:0008283 cell proliferation	-3.320716505	4.327402141	10	Abl1|Arg1|Cd24a|Igf2|Il2ra|Itgax|Tnfsf9|Pdcd1lg2|Cd274|Il23a	-1.697037394
BP	GO:0031295	T cell costimulation	19_GO:0022610 biological adhesion	-2.924882186	4.181797923	7	Cd24a|Ccr7|Efnb1|Lgals1|Tnfsf14|Pdcd1lg2|Cd274	-1.388651683
BP	GO:0031294	lymphocyte costimulation	19_GO:0002376 immune system process	-2.743014322	3.954992711	7	Cd24a|Ccr7|Efnb1|Lgals1|Tnfsf14|Pdcd1lg2|Cd274	-1.261862372
BP	GO:0046006	regulation of activated T cell proliferation	19_GO:0008283 cell proliferation	-2.701020346	3.79915602	8	Arg1|Cd24a|Igf2|Il2ra|Tnfsf9|Pdcd1lg2|Cd274|Il23a	-1.238114333
BP	GO:0032689	negative regulation of interferon-gamma production	19_GO:0048519 negative regulation of biological process	-2.498983289	3.64804434	7	Ddit3|Pglyrp1|Sh2d1b1|Pdcd1lg2|Cd274|Vsir|Il33	-1.091367758
BP	GO:0032693	negative regulation of interleukin-10 production	19_GO:0048519 negative regulation of biological process	-2.191384679	3.493863051	5	Tnfrsf9|Pdcd1lg2|Cd274|Vsir|Il23a	-0.885642581
BP	GO:0034330	cell junction organization	19_GO:0071840 cellular component organization or biogenesis	-3.310098633	3.734441802	33	Abl1|Macf1|Apod|Arvcf|Ctnnd1|Csf1r|Ect2|Dmtn|Epha2|Fscn1|Fn1|Gja1|Il1b|Itga5|Itgb1bp1|Jup|Smad3|Smad7|Numb|Cldn11|Prkca|Rock2|S100a10|Tgfbr1|Tjp1|Coro1c|Tjp3|Lsr|Ramp2|Pkp3|Whrn|Clasp2|Ophn1	-1.688058371
BP	GO:0034329	cell junction assembly	19_GO:0071840 cellular component organization or biogenesis	-3.168059189	3.666103	28	Abl1|Macf1|Apod|Arvcf|Ctnnd1|Ect2|Dmtn|Epha2|Fscn1|Fn1|Gja1|Il1b|Itga5|Itgb1bp1|Jup|Smad3|Smad7|Cldn11|Prkca|Rock2|S100a10|Tjp1|Coro1c|Lsr|Ramp2|Pkp3|Clasp2|Ophn1	-1.578320435
CC	GO:0005911	cell-cell junction		-2.589542198	3.082409812	41	Anxa5|Aqp4|Arvcf|Fabp7|Ctnnd1|Cd2|Cxcr4|Ect2|Epha2|Fscn1|Fzd4|Gja1|Itga5|Jup|Kit|Lck|Cldn11|Abcb4|Abcb1a|Pik3r1|Prkca|Plcg1|Ptprm|Stx3|Tgfbr1|Tjp1|Trpc4|Tjp3|Limd1|Clic4|Lsr|Pkp3|Mtdh|Flrt3|Sapcd2|Plxdc1|Arhgef6|Rap2b|Pcdhga12|Ajap1|Frmd4b	-1.151428269
BP	GO:0045216	cell-cell junction organization	19_GO:0071840 cellular component organization or biogenesis	-2.173059609	2.836902218	20	Arvcf|Ctnnd1|Csf1r|Ect2|Epha2|Fscn1|Gja1|Il1b|Jup|Smad3|Cldn11|Prkca|Rock2|Tgfbr1|Tjp1|Tjp3|Lsr|Ramp2|Pkp3|Whrn	-0.86956295
BP	GO:0048145	regulation of fibroblast proliferation	19_GO:0008283 cell proliferation	-3.293761966	3.999195807	16	Bax|Anxa2|Ccna2|Cdkn1a|E2f1|Fn1|Fth1|Ifng|Mif|Pdgfb|Sod2|Sphk1|Ifi30|Rasa1|Kmt2c|Ccnb1	-1.675497716
BP	GO:0048144	fibroblast proliferation	19_GO:0008283 cell proliferation	-3.202978345	3.914518425	16	Bax|Anxa2|Ccna2|Cdkn1a|E2f1|Fn1|Fth1|Ifng|Mif|Pdgfb|Sod2|Sphk1|Ifi30|Rasa1|Kmt2c|Ccnb1	-1.606351957
BP	GO:0048146	positive regulation of fibroblast proliferation	19_GO:0008283 cell proliferation	-2.660607659	3.558182641	11	Anxa2|Ccna2|Cdkn1a|E2f1|Fn1|Mif|Pdgfb|Sphk1|Rasa1|Kmt2c|Ccnb1	-1.202804195
CC	GO:0098589	membrane region		-3.276053131	3.65595228	40	Arc|Anxa2|Ctnnd1|Cd2|Cd24a|Cdh15|Arid3a|Efnb1|Eno1|Fas|Gja1|Pdpn|Hpse|Kcnn4|Lck|Lrp6|Pgk1|Prkca|Psen2|S100a10|Selplg|Scarb1|Tgfbr1|Tgfbr2|Plscr1|Trpc4|Coro1c|Tlr2|Asah2|P2ry12|Rap2b|Rftn1|Bicd2|Prom2|Pde2a|Myof|Rtn4rl1|Eif5a|Smo|Eno1b	-1.662115613
CC	GO:0045121	membrane raft		-3.020499201	3.462271655	38	Arc|Anxa2|Ctnnd1|Cd2|Cd24a|Cdh15|Arid3a|Efnb1|Eno1|Fas|Gja1|Pdpn|Hpse|Kcnn4|Lck|Lrp6|Pgk1|Prkca|Psen2|S100a10|Selplg|Scarb1|Tgfbr1|Tgfbr2|Plscr1|Trpc4|Coro1c|Tlr2|Asah2|P2ry12|Rap2b|Rftn1|Prom2|Pde2a|Myof|Rtn4rl1|Smo|Eno1b	-1.465055067
CC	GO:0098857	membrane microdomain		-2.999351042	3.444855774	38	Arc|Anxa2|Ctnnd1|Cd2|Cd24a|Cdh15|Arid3a|Efnb1|Eno1|Fas|Gja1|Pdpn|Hpse|Kcnn4|Lck|Lrp6|Pgk1|Prkca|Psen2|S100a10|Selplg|Scarb1|Tgfbr1|Tgfbr2|Plscr1|Trpc4|Coro1c|Tlr2|Asah2|P2ry12|Rap2b|Rftn1|Prom2|Pde2a|Myof|Rtn4rl1|Smo|Eno1b	-1.446704306
MF	GO:0005509	calcium ion binding		-3.269089838	3.572952123	57	Macf1|Adam8|Anxa4|Anxa5|Anxa8|Anxa2|Calm3|Capn3|Cd69|Cdh15|Cdk5r1|Ehd1|F10|F7|Gch1|Itpr2|Lpl|Cd93|Man1a2|Melk|Myl2|Padi2|Pla2g2d|Plcg1|Ryr1|S100a1|S100a10|S100a4|S100a6|S100a8|S100a9|Scin|Sell|Itsn2|Sparc|Tgm2|Thbs1|Tpd52|Plscr1|Cdh23|Adgre5|Hpcal1|Asah2|Hpgds|Chp1|Kcnip3|Clec4e|Clec4n|Smoc2|Pkd1l2|Fam20c|Aif1l|Caln1|Hpcal4|Dner|Gsn|Spata21	-1.655954342
MF	GO:0048306	calcium-dependent protein binding		-2.235787617	3.054960911	12	Anxa4|Anxa2|Calm3|S100a1|S100a10|S100a4|S100a6|S100a8|S100a9|Chp1|Kcnip3|Atp2b4	-0.911081206
BP	GO:0051438	regulation of ubiquitin-protein transferase activity	19_GO:0008152 metabolic process	-3.247002028	4.248621025	10	Abl1|Rps2|Smad7|Plk1|Psen2|Mad2l1|Rpl23|Arrdc4|Cdc20|Trib3	-1.639166875
BP	GO:0051444	negative regulation of ubiquitin-protein transferase activity	19_GO:0048519 negative regulation of biological process	-2.503269621	3.950354791	5	Abl1|Smad7|Psen2|Mad2l1|Rpl23	-1.093150946
BP	GO:1903320	regulation of protein modification by small protein conjugation or removal	19_GO:0008152 metabolic process	-2.104958842	2.728245499	24	Abl1|Tspo|Capn3|Egr1|Hsp90aa1|Rps2|Smad7|Plk1|Psen2|Sox4|Sphk1|Tgfbr1|Mad2l1|Chp1|Huwe1|Rpl23|Arrdc4|Mycbp2|Cdc20|Sumo2|Trib3|Tspyl5|Peli3|Isg15	-0.821907495
CC	GO:0005839	proteasome core complex		-3.243576526	4.763270211	6	Psmb8|Psma2|Psmb4|Psmb5|Psmb6|Psma5	-1.639166875
MF	GO:0004298	threonine-type endopeptidase activity		-2.986557987	4.421846367	6	Psmb8|Psma2|Psmb4|Psmb5|Psmb6|Psma5	-1.437382848
MF	GO:0070003	threonine-type peptidase activity		-2.986557987	4.421846367	6	Psmb8|Psma2|Psmb4|Psmb5|Psmb6|Psma5	-1.437382848
BP	GO:0010499	proteasomal ubiquitin-independent protein catabolic process	19_GO:0008152 metabolic process	-2.870219209	4.266965787	6	Psmb8|Psma2|Psmb4|Psmb5|Psmb6|Psma5	-1.352259577
BP	GO:0003013	circulatory system process	19_GO:0032501 multicellular organismal process	-3.236652904	3.57871374	49	Adora2a|Adora2b|Adra2a|Adra2b|Cd38|Cxcr4|Col1a2|Eng|Gch1|Gja1|Nr3c1|Hbegf|Ifng|Itgb1bp1|Jup|Anpep|Smad3|Smad7|Mif|Myl2|Nos2|Oprl1|P2ry2|Pdgfb|Pik3r1|Prkca|Psen2|Ptger2|Ptprm|Rgs2|Rock2|S100a1|Snta1|Sod2|Mgll|Bin1|Ramp2|Ramp3|Ddah1|Cyp4f18|Hopx|Nav2|Npy|Gpr37l1|Pde2a|Dock4|Mtnr1b|Adamts16|Atp2b4	-1.633811104
BP	GO:0008015	blood circulation	19_GO:0032501 multicellular organismal process	-3.192749351	3.548900799	48	Adora2a|Adora2b|Adra2a|Adra2b|Cd38|Cxcr4|Col1a2|Eng|Gch1|Gja1|Nr3c1|Hbegf|Ifng|Itgb1bp1|Jup|Anpep|Smad3|Smad7|Mif|Myl2|Nos2|Oprl1|P2ry2|Pdgfb|Pik3r1|Prkca|Psen2|Ptger2|Ptprm|Rgs2|Rock2|S100a1|Snta1|Sod2|Mgll|Bin1|Ramp2|Ddah1|Cyp4f18|Hopx|Nav2|Npy|Gpr37l1|Pde2a|Dock4|Mtnr1b|Adamts16|Atp2b4	-1.59836739
BP	GO:0044057	regulation of system process	19_GO:0032501 multicellular organismal process	-2.835261281	3.238752166	55	Adora2a|Adora2b|Adra2a|Adra2b|Arg2|Cacnb3|Cd38|Cst7|Gch1|Gja1|S1pr2|Nr3c1|Gtf2i|Hbegf|Ifng|Igfbp5|Il1b|Itgax|Jup|Kit|Fabp5|Klf4|Anpep|Lck|Smad3|Smad7|Mef2c|Myl2|Oprl1|Pdgfb|Abcb1a|Pik3r1|Prkca|Ptger2|Rgs2|Rock2|Ryr1|S100a1|Sct|Snta1|Sphk1|Trpc3|Nr1h3|Mgll|Bin1|Calcrl|Gpr35|Tppp|Hopx|Hcar2|Kcnc4|Dock4|Mtnr1b|Fcgr4|Atp2b4	-1.325098163
BP	GO:0003018	vascular process in circulatory system	19_GO:0032501 multicellular organismal process	-2.250829187	2.893316479	22	Adora2a|Adora2b|Adra2a|Adra2b|Cd38|Gch1|Gja1|Nr3c1|Itgb1bp1|P2ry2|Pdgfb|Ptprm|Rgs2|Rock2|Snta1|Sod2|Mgll|Ramp2|Ddah1|Pde2a|Dock4|Mtnr1b	-0.920309952
BP	GO:0090257	regulation of muscle system process	19_GO:0032501 multicellular organismal process	-2.020235706	2.641664925	24	Adora2b|Adra2a|Adra2b|Arg2|Nr3c1|Gtf2i|Igfbp5|Jup|Kit|Klf4|Lck|Smad3|Smad7|Mef2c|Prkca|Rgs2|Rock2|Ryr1|Sphk1|Trpc3|Bin1|Calcrl|Dock4|Atp2b4	-0.761594635
BP	GO:0001503	ossification	19_GO:0032501 multicellular organismal process	-3.232512653	3.621466756	40	Acp5|Acvr2b|Gla|Areg|Ccr1|Col1a2|Ecm1|Epha2|Erh|Fgr|Gja1|Gpld1|Id3|Ifi204|Igf2|Igfbp5|Lrp6|Ltf|Smad3|Smad7|Mef2c|P2ry2|Srgn|Ryr1|Spp1|Tob1|Limd1|Tob2|Rsad2|Fignl1|Pdlim7|Rpl38|Ifitm1|Fam20c|Pkdcc|Ffar4|Bmp2k|Tmem119|Smo|Isg15	-1.632012069
BP	GO:0030278	regulation of ossification	19_GO:0032501 multicellular organismal process	-2.676369188	3.257270078	26	Acvr2b|Areg|Ccr1|Ecm1|Gja1|Id3|Ifi204|Igfbp5|Lrp6|Ltf|Smad3|Smad7|Mef2c|P2ry2|Srgn|Tob1|Limd1|Tob2|Rsad2|Pdlim7|Fam20c|Pkdcc|Ffar4|Bmp2k|Tmem119|Isg15	-1.21572513
BP	GO:0030500	regulation of bone mineralization	19_GO:0032502 developmental process	-2.52995864	3.375753517	12	Acvr2b|Ccr1|Ecm1|Gja1|Smad3|Mef2c|Srgn|Fam20c|Pkdcc|Bmp2k|Tmem119|Isg15	-1.111731547
BP	GO:0030282	bone mineralization	19_GO:0032502 developmental process	-2.274028065	3.020230256	15	Acvr2b|Gla|Ccr1|Col1a2|Ecm1|Fgr|Gja1|Smad3|Mef2c|Srgn|Fam20c|Pkdcc|Bmp2k|Tmem119|Isg15	-0.937617148
BP	GO:0045778	positive regulation of ossification	19_GO:0048518 positive regulation of biological process	-2.099865952	2.876360672	13	Acvr2b|Ifi204|Lrp6|Ltf|Smad3|Mef2c|Tob2|Pdlim7|Fam20c|Pkdcc|Ffar4|Tmem119|Isg15	-0.82054568
BP	GO:0031214	biomineral tissue development	19_GO:0032502 developmental process	-2.098154623	2.784239449	18	Acvr2b|Gla|Ccr1|Col1a2|Ecm1|Fgr|Gja1|Itgb1bp1|Smad3|Mef2c|Srgn|Spp1|Fam20c|Pkdcc|Bmp2k|Fam20a|Tmem119|Isg15	-0.819205702
MF	GO:0008047	enzyme activator activity		-3.216775141	3.581682194	45	Apoc2|Arhgap5|Cd24a|Cdk5r1|Cdkn1a|Ect2|Erbb3|Evi5|Fn1|Srgap2|Rack1|Igf2|Ltf|Pdgfb|Pim1|Psme2|Rgs2|Racgap1|Cks1b|Acrbp|Rgcc|Etaa1|Smap2|Noxo1|Tpx2|Tbc1d5|Tagap|Vsir|Arhgap12|Depdc1a|Dnajb1|Ophn1|Garnl3|Arap3|Fam20a|Rasa1|Fam13b|Asap3|Adap1|Gprc5a|Dock4|Arhgap22|Rasgrp3|Ccnb1|Rasal3	-1.619376674
MF	GO:0030695	GTPase regulator activity		-2.003472452	2.616924227	25	Arhgap5|Ect2|Evi5|Srgap2|Itgb1bp1|Rgs2|Racgap1|Smap2|Tbc1d5|Tagap|Arhgap12|Gpsm2|Depdc1a|Ophn1|Sh3bp4|Garnl3|Arap3|Rasa1|Fam13b|Asap3|Adap1|Dock4|Arhgap22|Rasgrp3|Rasal3	-0.752204122
BP	GO:1901976	regulation of cell cycle checkpoint	19_GO:0048519 negative regulation of biological process	-3.191919114	4.377582235	8	Prox1|Aurka|Ppp1r10|Mad2l1|Ndc80|Cdt1|Etaa1|Ccnb1	-1.59836739
BP	GO:0090231	regulation of spindle checkpoint	19_GO:0048519 negative regulation of biological process	-2.753166891	4.314809487	5	Aurka|Mad2l1|Ndc80|Cdt1|Ccnb1	-1.268163487
BP	GO:1901977	negative regulation of cell cycle checkpoint	19_GO:0048519 negative regulation of biological process	-2.226420272	4.158851146	3	Aurka|Ppp1r10|Cdt1	-0.91028977
BP	GO:0090266	regulation of mitotic cell cycle spindle assembly checkpoint	19_GO:0048519 negative regulation of biological process	-2.130445216	3.609807294	4	Mad2l1|Ndc80|Cdt1|Ccnb1	-0.841356663
BP	GO:1903504	regulation of mitotic spindle checkpoint	19_GO:0048519 negative regulation of biological process	-2.130445216	3.609807294	4	Mad2l1|Ndc80|Cdt1|Ccnb1	-0.841356663
MF	GO:0019903	protein phosphatase binding		-3.169380073	3.748424204	22	Ctnnd1|Csf1r|Eif4ebp1|Rack1|Hsp90aa1|Jup|Kcnn4|Lck|Lgals3|Nek2|Pik3r1|Ppp1ca|Pstpip1|Sphk1|Vim|Ppp1r10|Mfhas1|Fbxl2|Cttnbp2nl|Klre1|Ppp1r9a|Atp2b4	-1.578881398
MF	GO:0019902	phosphatase binding		-2.824486384	3.401440176	25	Ctnnd1|Csf1r|Eif4ebp1|Rack1|Hsp90aa1|Jup|Kcnn4|Lck|Lgals3|Smad3|Nek2|Pik3r1|Ppp1ca|Pstpip1|Sphk1|Vim|Ppp1r10|Mfhas1|Fbxl2|Cttnbp2nl|Csrnp2|Klre1|Ppp1r9a|Sbf2|Atp2b4	-1.318711072
BP	GO:0061113	pancreas morphogenesis	19_GO:0032502 developmental process	-3.110162586	5.876220327	3	Prox1|Cela1|Smo	-1.539728987
MF	GO:0050693	LBD domain binding		-2.226420272	4.158851146	3	Cited2|Prox1|Spon1	-0.91028977
BP	GO:0002159	desmosome assembly	19_GO:0071840 cellular component organization or biogenesis	-3.110162586	5.876220327	3	Jup|Prkca|Pkp3	-1.539728987
BP	GO:0001773	myeloid dendritic cell activation	19_GO:0002376 immune system process	-3.101935678	4.272410034	8	Clec4d|Cd244a|Pirb|Tgfbr2|Tnfsf9|Klrk1|Dcstamp|Pilrb1	-1.534397387
MF	GO:0042288	MHC class I protein binding		-2.391940069	3.787714965	5	Cd244a|Tap1|Klrk1|Pilrb1|Pilrb2	-1.020696423
MF	GO:0042287	MHC protein binding		-2.352602959	3.462041005	7	Klrd1|Lag3|Cd244a|Tap1|Klrk1|Pilrb1|Pilrb2	-0.996250868
BP	GO:0031329	regulation of cellular catabolic process	19_GO:0008152 metabolic process	-3.067634343	3.392760318	66	Adam8|Adra2a|Apoc2|Bax|Tspo|Anxa2|Cst3|Ddit3|E2f1|Efna1|Gfap|Rack1|Gpld1|Hpgd|Hsp90aa1|Ifng|Il1b|Eif6|Smad7|Rab8a|Mif|Plk1|Ppp1ca|Psen2|Psme2|Qk|Rock2|Scarb1|Aurka|Timp1|Tob1|Vim|Sufu|Tlr2|Pbk|Carhsp1|Mefv|Scoc|Mtch2|Pkp3|Huwe1|Rpl23|Aqp11|Mtdh|Ecscr|Fbxl2|Plekhf1|Il33|Ophn1|Sh3bp4|Cdc20|Sumo2|Tnrc6c|Mylip|Slc2a6|Trib3|Acer2|Pabpc4|Smg1|Zc3h12d|Rnf217|Tigar|Parl|Atp2b4|Trim5|Rubcn	-1.501536498
BP	GO:0045862	positive regulation of proteolysis	19_GO:0048518 positive regulation of biological process	-2.851884632	3.339968437	35	Adam8|Adra2a|Bax|Capn3|Ctnnd1|Efna1|Fas|Rack1|Gpld1|Ifng|Il1b|Lck|Smad3|Smad7|Plk1|Psen2|Psme2|Rock2|S100a8|S100a9|Aurka|Mefv|Mtch2|Prelid1|Ecscr|Ist1|Vsir|Il33|Cdc20|Sumo2|Gsn|Trib3|Acer2|Spon1|Rnf217	-1.338135402
BP	GO:0042176	regulation of protein catabolic process	19_GO:0008152 metabolic process	-2.446388971	2.973633186	37	Adam8|Adra2a|Anxa2|Cst3|Efna1|Gfap|Gja1|Rack1|Gpld1|Hsp90aa1|Ifng|Il1b|Smad3|Smad7|Nos2|Plk1|Psen2|Psme2|Aurka|Timp1|Sufu|Pbk|Mad2l1|Huwe1|Rpl23|Smurf2|Aqp11|Ecscr|Il33|Ophn1|Mycbp2|Cdc20|Sumo2|Mylip|Trib3|Ppp2r3a|Rnf217	-1.05596136
BP	GO:0009895	negative regulation of catabolic process	19_GO:0048519 negative regulation of biological process	-2.265940322	2.843982891	30	Adra2a|Apoc1|Tspo|Anxa2|Cst3|E2f1|Efna1|Gpld1|Il1b|Smad3|Nos2|Pde3b|Psen2|Qk|Timp1|Tob1|Sufu|Pbk|Mad2l1|Mtch2|Pkp3|Rpl23|Aqp11|Hcar2|Ophn1|Mycbp2|Smg1|Tigar|Atp2b4|Rubcn	-0.930375982
BP	GO:0009896	positive regulation of catabolic process	19_GO:0048518 positive regulation of biological process	-2.039881232	2.580594225	40	Adam8|Adra2a|Apoc2|Bax|Ddit3|Gja1|Rack1|Gpld1|Hsp90aa1|Ifng|Il1b|Smad7|Mif|Plk1|Psen2|Qk|Rock2|Sct|Aurka|Tob1|Tlr2|Mefv|Scoc|Huwe1|Smurf2|Mtdh|Ecscr|Plekhf1|Vsir|Il33|Sh3bp4|Cdc20|Sumo2|Tnrc6c|Mylip|Trib3|Ppp2r3a|Zc3h12d|Rnf217|Trim5	-0.776249069
BP	GO:0031640	killing of cells of other organism	19_GO:0001906 cell killing	-3.052612168	3.975588222	11	Arg1|Cxcl1|Cxcl10|Ifng|Lgals3|Ltf|Nos2|Cxcl2|Pglyrp1|Cxcl14|Trem1	-1.489380964
BP	GO:0044364	disruption of cells of other organism	19_GO:0051704 multi-organism process	-3.052612168	3.975588222	11	Arg1|Cxcl1|Cxcl10|Ifng|Lgals3|Ltf|Nos2|Cxcl2|Pglyrp1|Cxcl14|Trem1	-1.489380964
BP	GO:0009620	response to fungus	19_GO:0051704 multi-organism process	-2.516907524	3.506735417	9	Ang|Arg1|Cxcl1|Ltf|Tlr2|Tslp|Clec4n|Npy|Scimp	-1.102753563
BP	GO:0050832	defense response to fungus	19_GO:0051704 multi-organism process	-2.424302753	3.553352117	7	Ang|Arg1|Cxcl1|Ltf|Tslp|Clec4n|Npy	-1.040483481
BP	GO:0070948	regulation of neutrophil mediated cytotoxicity	19_GO:0001906 cell killing	-2.226420272	4.158851146	3	Arg1|Dnase1l3|Cxcl1	-0.91028977
BP	GO:0070942	neutrophil mediated cytotoxicity	19_GO:0001906 cell killing	-2.130445216	3.609807294	4	Arg1|Dnase1l3|Cxcl1|Trem1	-0.841356663
BP	GO:0051712	positive regulation of killing of cells of other organism	19_GO:0001906 cell killing	-2.016158034	3.422926675	4	Arg1|Cxcl1|Ifng|Nos2	-0.76157685
BP	GO:0032769	negative regulation of monooxygenase activity	19_GO:0048519 negative regulation of biological process	-3.04914493	4.746156456	5	Gla|Arg2|Eng|Nfkb1|Atp2b4	-1.488051357
BP	GO:0051001	negative regulation of nitric-oxide synthase activity	19_GO:0048519 negative regulation of biological process	-2.726547466	4.587021985	4	Gla|Arg2|Eng|Atp2b4	-1.256207659
BP	GO:0051354	negative regulation of oxidoreductase activity	19_GO:0048519 negative regulation of biological process	-2.576844433	3.746362721	7	Gla|Arg2|Eng|Gzma|Nfkb1|Prdx5|Atp2b4	-1.143603724
BP	GO:0045019	negative regulation of nitric oxide biosynthetic process	19_GO:0048519 negative regulation of biological process	-2.503269621	3.950354791	5	Acp5|Gla|Tspo|Rock2|Atp2b4	-1.093150946
BP	GO:1904406	negative regulation of nitric oxide metabolic process	19_GO:0048519 negative regulation of biological process	-2.503269621	3.950354791	5	Acp5|Gla|Tspo|Rock2|Atp2b4	-1.093150946
BP	GO:0071347	cellular response to interleukin-1	19_GO:0050896 response to stimulus	-3.022083696	3.846068517	13	Egr1|Fn1|Il1b|Il1r2|Il1rn|Acod1|Nfkb1|Saa3|Ccl6|Ccl7|Ccl9|Cd40|Zbp1	-1.465055067
BP	GO:0070555	response to interleukin-1	19_GO:0050896 response to stimulus	-2.801699158	3.588491092	14	Egr1|Fn1|Il1b|Il1r2|Il1rn|Acod1|Nfkb1|Prkca|Saa3|Ccl6|Ccl7|Ccl9|Cd40|Zbp1	-1.301012751
BP	GO:2000659	regulation of interleukin-1-mediated signaling pathway	19_GO:0023052 signaling	-2.226420272	4.158851146	3	Il1r2|Il1rn|Zbp1	-0.91028977
MF	GO:0015631	tubulin binding		-3.021518599	3.469300362	37	Macf1|Birc5|Gja1|Map1b|Ndrg1|Nme1|Plk1|Kif20a|Rgs2|S100a8|S100a9|Racgap1|Knstrn|Ccdc69|Spag5|Chp1|Ska1|Tppp3|Ppp1r42|Tpx2|Tppp|Kif2c|Haus8|Clasp2|Mtus1|Nusap1|Kif22|Mlph|Prc1|Setd2|Ofd1|Gas2l3|Nav3|Kif19a|Hook3|Brsk1|Pifo	-1.465055067
MF	GO:0008017	microtubule binding		-2.52177875	3.106326893	27	Macf1|Birc5|Map1b|Ndrg1|Plk1|Kif20a|S100a8|S100a9|Racgap1|Knstrn|Ccdc69|Spag5|Chp1|Ska1|Tpx2|Kif2c|Haus8|Clasp2|Mtus1|Nusap1|Kif22|Mlph|Prc1|Gas2l3|Nav3|Kif19a|Hook3	-1.106101838
CC	GO:0099513	polymeric cytoskeletal fiber		-2.216928321	2.702919593	57	Macf1|Adora2a|Birc5|Aspm|Cdk1|Ddx6|Dmtn|Gfap|Gja1|Eif6|Jup|Lmnb1|Map1b|Myo1b|Ndrg1|Nek2|Nme1|Nme2|Cldn11|Plk1|Pstpip1|Kif20a|Aurkb|Aurka|Tmod1|Vim|Yes1|Knstrn|Spag5|Mefv|Arpc3|Ska1|Pdlim7|Tppp3|Mid1ip1|Tpx2|Wdr44|Tppp|Atat1|Whrn|Kif2c|Haus8|Clasp2|Ckap2|Gramd3|Aif1l|Nusap1|Kif22|Mlph|Prc1|Gas2l3|Nav3|Kif19a|Hook3|Iffo1|Tpm4|Dnah2	-0.904822821
BP	GO:1990748	cellular detoxification	19_GO:0098754 detoxification	-2.932370508	4.073276979	8	Prdx6|Dhfr|Esd|Gch1|Prdx1|Pim1|Sod2|Akr1a1	-1.393446698
BP	GO:0034312	diol biosynthetic process	19_GO:0008152 metabolic process	-2.191384679	3.493863051	5	Dhfr|Gch1|Sphk1|Asah2|Acer2	-0.885642581
BP	GO:0098754	detoxification	19_GO:0098754 detoxification	-2.19045054	3.179847039	8	Prdx6|Dhfr|Esd|Gch1|Prdx1|Pim1|Sod2|Akr1a1	-0.885497351
BP	GO:0035701	hematopoietic stem cell migration	19_GO:0040011 locomotion	-2.92775371	4.91836685	4	Cxcr4|Ccr2|Kit|Mtch2	-1.390178642
MF	GO:0016209	antioxidant activity		-2.922209078	3.745533874	13	Prdx6|Gsr|Prdx1|S100a8|S100a9|Selenow|Sod2|Prdx4|Prdx5|Gpx7|Srxn1|Hba-a2|Kdm3b	-1.386649301
MF	GO:0051920	peroxiredoxin activity		-2.726547466	4.587021985	4	Prdx6|Prdx1|Prdx4|Prdx5	-1.256207659
MF	GO:0008379	thioredoxin peroxidase activity		-2.226420272	4.158851146	3	Prdx1|Prdx4|Prdx5	-0.91028977
BP	GO:0019933	cAMP-mediated signaling	19_GO:0023052 signaling	-2.906568913	3.500031154	23	Adora2a|Adora2b|Adra2a|Adra2b|S1pr2|Adgrg1|Cxcl10|Nme2|Oprl1|Pde3b|Ptger2|Rgs2|Sct|Aplnr|Adgre5|Pde7b|Ramp2|Calcrl|Ramp3|Ffar4|Pde2a|Atp2b4|Adgrg5	-1.374347311
BP	GO:0019935	cyclic-nucleotide-mediated signaling	19_GO:0023052 signaling	-2.797376709	3.377129632	25	Adora2a|Adora2b|Adra2a|Adra2b|S1pr2|Adgrg1|Cxcl10|Nme2|Oprl1|Pde3b|Ptger2|Rgs2|Sct|Thbs1|Aplnr|Adgre5|Pde7b|Ramp2|Calcrl|Ramp3|Ffar4|Pde2a|Mtnr1b|Atp2b4|Adgrg5	-1.297814586
BP	GO:0019932	second-messenger-mediated signaling	19_GO:0023052 signaling	-2.74211934	3.209112012	42	Adora2a|Adora2b|Adra2a|Adra2b|Bst1|Calm3|Cd24a|Cxcr4|Ccr1|Ccr2|Ccr7|Dmtn|Erbb3|S1pr2|Adgrg1|Hint1|Cxcl10|Nme2|Nos2|Oprl1|Pde3b|Pdgfb|Plcg1|Ptger2|Rgs2|Sct|Sphk1|Thbs1|Aplnr|Adgre5|Pde7b|Ramp2|Calcrl|Ramp3|Chp1|P2ry12|Ffar4|Pde2a|Ppp1r9a|Mtnr1b|Atp2b4|Adgrg5	-1.261862372
BP	GO:0043951	negative regulation of cAMP-mediated signaling	19_GO:0048519 negative regulation of biological process	-2.144082243	3.289364143	6	Oprl1|Pde3b|Rgs2|Aplnr|Pde2a|Atp2b4	-0.848871376
BP	GO:0007189	adenylate cyclase-activating G protein-coupled receptor signaling pathway	19_GO:0023052 signaling	-2.055793598	2.768527523	16	Adora2a|Adora2b|Adra2a|Adra2b|S1pr2|Adgrg1|Cxcl10|Nme2|Oprl1|Ptger2|Adgre5|Ramp2|Calcrl|Ramp3|Atp2b4|Adgrg5	-0.78493507
BP	GO:0043277	apoptotic cell clearance	19_GO:0051179 localization	-2.903425441	3.949259401	9	Ccr2|Fcnb|Mertk|Scarb1|Tgm2|Thbs1|Nr1h3|Rhobtb1|Cd300lf	-1.372531958
BP	GO:0043116	negative regulation of vascular permeability	19_GO:0032501 multicellular organismal process	-2.894491369	4.520770982	5	Adora2a|Nr3c1|Ramp2|Ddah1|Pde2a	-1.367558046
BP	GO:0046641	positive regulation of alpha-beta T cell proliferation	19_GO:0022610 biological adhesion	-2.870219209	4.266965787	6	Cd24a|Ccr2|Cd244a|Tgfbr2|Il23a|Rasal3	-1.352259577
BP	GO:0046635	positive regulation of alpha-beta T cell activation	19_GO:0022610 biological adhesion	-2.210060843	3.098236342	10	Cd24a|Ccr2|Ccr7|H2-Ab1|Ifng|Il2rg|Cd244a|Tgfbr2|Il23a|Rasal3	-0.89995394
BP	GO:0090594	inflammatory response to wounding	19_GO:0050896 response to stimulus	-2.016158034	3.422926675	4	Cd24a|Cd44|Ccr2|Timp1	-0.76157685
BP	GO:0120035	regulation of plasma membrane bounded cell projection organization	19_GO:0071840 cellular component organization or biogenesis	-2.870090587	3.233649093	68	Abl1|Macf1|Arc|Cd24a|Cd38|Cd44|Cdk5r1|Cxcr4|Ccr7|Efna1|Ehd1|Dmtn|Epha2|Fscn1|Fn1|Fxn|Fzd4|Gfap|Pdpn|Nr3c1|Hes1|Hsp90aa1|Kit|Klf4|Lgals1|Lrp6|Mef2c|Mif|Map1b|Neurl1a|Nme1|Nme2|Numb|P2ry2|Pld1|Qk|Rgs2|S100a9|Itsn2|Sphk1|Tgfbr1|Vim|Coro1c|Mgll|Ulk2|Atp8a2|Tctex1d2|Eps8l1|Anln|P2ry12|Ist1|Clasp2|Tanc2|Kidins220|Mycbp2|Cdc20|Creb3l2|Sema6d|Mylip|Rtn4rl1|Csmd3|Ppp1r9a|Plxna4|Nav3|Adamts16|Prex1|Nrcam|B…	-1.352259577
BP	GO:0010720	positive regulation of cell development	19_GO:0048518 positive regulation of biological process	-2.21189976	2.70043499	56	Abl1|Adra2b|Tspo|Aspm|Cd24a|Cxcr4|Ccr2|E2f1|Ect2|Ehd1|Dmtn|Fn1|Fxn|Fzd4|Gfap|S1pr2|Nr3c1|Hes1|Ifng|Il1b|Kit|Lrp6|Smad7|Mef2c|Mif|Map1b|Neurl1a|Nme1|Nme2|Numb|P2ry2|Abcb1a|Prox1|Qk|Rgs2|S100a10|S100a9|Itsn2|Sphk1|Aurka|Zeb1|Vim|Tlr2|Bin1|Atp8a2|Net1|Mmd|P2ry12|Ist1|Kidins220|Slc9b2|Creb3l2|Ppp1r9a|Plxna4|Prex1|Smo	-0.900994521
BP	GO:0022604	regulation of cell morphogenesis	19_GO:0071840 cellular component organization or biogenesis	-2.149007748	2.666667593	46	Abl1|Macf1|Arc|Rhob|Cd44|Cdk5r1|Cxcr4|Csf1r|Efna1|Epb41l2|Dmtn|Fgr|Fn1|Fxn|Fzd4|Pdpn|Itgb1bp1|Kit|Map1b|Numb|S100a10|Itsn2|Sparc|Vim|Fmnl3|Coro1c|Mgll|Limd1|Ulk2|Net1|Zmym4|Rhobtb1|Ist1|Rnd3|Clasp2|Tanc2|Bcl9l|Zmym6|Arhgef18|Mycbp2|Arap3|Sema6d|Ppp1r9a|Plxna4|Prex1|Brsk1	-0.850703051
BP	GO:0051962	positive regulation of nervous system development	19_GO:0048518 positive regulation of biological process	-2.143125754	2.639221063	55	Adra2b|Tspo|Aspm|Cd24a|Cxcr4|Ccr2|Cst7|E2f1|Ect2|Ehd1|Fn1|Fxn|Fzd4|Gfap|Nr3c1|Hes1|Ifng|Il1b|Itgax|Kit|Lrp6|Mef2c|Mif|Map1b|Neurl1a|Nme1|Nme2|Numb|P2ry2|Pik3r1|Prkca|Prox1|Qk|Rgs2|S100a9|Itsn2|Sphk1|Zeb1|Vim|Tlr2|Adgre5|Bin1|Atp8a2|Mmd|P2ry12|Flrt3|Ist1|Tppp|Kidins220|Cdc20|Gpr37l1|Creb3l2|Ppp1r9a|Plxna4|Smo	-0.84830007
BP	GO:0045664	regulation of neuron differentiation	19_GO:0032502 developmental process	-2.030390966	2.519012867	63	Abl1|Macf1|Adra2b|Arc|Aspm|Cd24a|Cd38|Cdk5r1|Cxcr4|Ddx6|Ect2|Efna1|Ehd1|Eya1|Fn1|Fxn|Fzd4|Gfap|Nr3c1|Hes1|Ifng|Il1b|Klf4|Lgals1|Lrp6|Mef2c|Mif|Map1b|Neurl1a|Nme1|Nme2|Numb|P2ry2|Prox1|Qk|Rgs2|S100a9|Itsn2|Sphk1|Zeb1|Vim|Mgll|Ulk2|Bin1|Atp8a2|Mmd|Ist1|Clasp2|Tanc2|Kidins220|Mycbp2|Cdc20|Gpr37l1|Creb3l2|Sema6d|Mylip|Rtn4rl1|Csmd3|Ppp1r9a|Plxna4|Prex1|Nrcam|Brsk1	-0.769616014
MF	GO:0070851	growth factor receptor binding		-2.850876334	3.513277926	19	Angpt2|Areg|Cd44|Csf3|Ecm1|Hbegf|Il1b|Il1rn|Itga5|Pdgfb|Pgf|Pik3r1|Plscr1|Vav2|Yes1|Tslp|Flrt3|Rasa1|Cd300lf	-1.338135402
MF	GO:0005154	epidermal growth factor receptor binding		-2.352602959	3.462041005	7	Areg|Cd44|Hbegf|Itga5|Plscr1|Vav2|Yes1	-0.996250868
BP	GO:0097581	lamellipodium organization	19_GO:0071840 cellular component organization or biogenesis	-2.826030031	3.647884548	13	Cd44|Dmtn|Epha2|Fscn1|Srgap2|Pdpn|Hsp90aa1|Kit|Vav2|Coro1c|P2ry12|Arhgef6|Arhgef4	-1.318887377
BP	GO:0046847	filopodium assembly	19_GO:0071840 cellular component organization or biogenesis	-2.256227368	3.151783266	10	Ccr7|Dmtn|Fscn1|Srgap2|S1pr2|Neurl1a|Tgfbr1|Fgd2|Arhgef4|Ppp1r9a	-0.925177258
BP	GO:0030032	lamellipodium assembly	19_GO:0071840 cellular component organization or biogenesis	-2.210060843	3.098236342	10	Dmtn|Epha2|Fscn1|Srgap2|Hsp90aa1|Kit|Vav2|P2ry12|Arhgef6|Arhgef4	-0.89995394
BP	GO:0051348	negative regulation of transferase activity	19_GO:0065007 biological regulation	-2.825747238	3.371607205	28	Abl1|Adora2a|Fabp4|Cdkn1a|Cdkn1c|Cdkn2c|Ifng|Il1b|Itgb1bp1|Lrp6|Smad7|Prkca|Plk1|Psen2|Rgs2|Coro1c|Gadd45g|Spry1|Mad2l1|Chp1|Rpl23|Ubash3b|Hexim1|Trib3|Gprc5a|Dusp7|Tigar|Rubcn	-1.318887377
BP	GO:0042326	negative regulation of phosphorylation	19_GO:0048519 negative regulation of biological process	-2.776872285	3.229689247	44	Abl1|Adora2a|Fabp4|Atf3|Bax|Cdkn1a|Cdkn1c|Cdkn2c|Cdkn2d|Efna1|Eng|Dmtn|Rack1|Ifng|Il1b|Itgb1bp1|Klf4|Lrp6|Smad7|Prkca|Plk1|Psen2|Rgs2|Sh3gl2|Slfn1|Coro1c|Gadd45g|Spry1|Sh2d1b1|Pbk|Chp1|Mtch2|Pmepa1|Rnf149|Ubash3b|Prdm15|Hexim1|Pde2a|Trib3|Gprc5a|Dusp7|Ccnb1|Tigar|Rubcn	-1.280383737
BP	GO:0033673	negative regulation of kinase activity	19_GO:0048519 negative regulation of biological process	-2.71746499	3.304938386	25	Abl1|Adora2a|Fabp4|Cdkn1a|Cdkn1c|Cdkn2c|Ifng|Il1b|Itgb1bp1|Lrp6|Prkca|Plk1|Psen2|Rgs2|Coro1c|Gadd45g|Spry1|Chp1|Ubash3b|Hexim1|Trib3|Gprc5a|Dusp7|Tigar|Rubcn	-1.248411619
BP	GO:0006469	negative regulation of protein kinase activity	19_GO:0048519 negative regulation of biological process	-2.595106692	3.214607713	23	Abl1|Adora2a|Fabp4|Cdkn1a|Cdkn1c|Cdkn2c|Ifng|Il1b|Itgb1bp1|Lrp6|Prkca|Plk1|Psen2|Rgs2|Coro1c|Gadd45g|Spry1|Chp1|Ubash3b|Hexim1|Trib3|Gprc5a|Dusp7	-1.155920431
BP	GO:0031400	negative regulation of protein modification process	19_GO:0048519 negative regulation of biological process	-2.593059664	3.046210808	52	Abl1|Adora2a|Fabp4|Atf3|Bax|Tspo|Capn3|Cdkn1a|Cdkn1c|Cdkn2c|Efna1|Eng|Dmtn|Rack1|Ifng|Il1b|Itgb1bp1|Klf4|Lrp6|Smad7|Prkca|Plk1|Psen2|Rgs2|Rock2|Sh3gl2|Slfn1|Snta1|Sox4|Coro1c|Gadd45g|Spry1|Sh2d1b1|Pbk|Mfhas1|Mad2l1|Chp1|Rpl23|Pmepa1|Rnf149|Ubash3b|Tppp|Prdm15|Hexim1|Trib3|Acer2|Gprc5a|Dusp7|Peli3|Ccnb1|Atp2b4|Isg15	-1.1544099
BP	GO:0010563	negative regulation of phosphorus metabolic process	19_GO:0048519 negative regulation of biological process	-2.549374882	3.014800766	50	Abl1|Adora2a|Fabp4|Atf3|Bax|Tspo|Entpd1|Cdkn1a|Cdkn1c|Cdkn2c|Cdkn2d|Efna1|Eng|Dmtn|Rack1|Ifng|Il1b|Itgb1bp1|Klf4|Lrp6|Smad7|Pdgfb|Prkca|Plk1|Psen2|Rgs2|Rock2|Sh3gl2|Slfn1|Coro1c|Gadd45g|Spry1|Sh2d1b1|Pbk|Mfhas1|Chp1|Mtch2|Pmepa1|Rnf149|Ubash3b|Prdm15|Hexim1|Pde2a|Csrnp2|Trib3|Gprc5a|Dusp7|Ccnb1|Tigar|Rubcn	-1.128067673
BP	GO:0045936	negative regulation of phosphate metabolic process	19_GO:0048519 negative regulation of biological process	-2.549374882	3.014800766	50	Abl1|Adora2a|Fabp4|Atf3|Bax|Tspo|Entpd1|Cdkn1a|Cdkn1c|Cdkn2c|Cdkn2d|Efna1|Eng|Dmtn|Rack1|Ifng|Il1b|Itgb1bp1|Klf4|Lrp6|Smad7|Pdgfb|Prkca|Plk1|Psen2|Rgs2|Rock2|Sh3gl2|Slfn1|Coro1c|Gadd45g|Spry1|Sh2d1b1|Pbk|Mfhas1|Chp1|Mtch2|Pmepa1|Rnf149|Ubash3b|Prdm15|Hexim1|Pde2a|Csrnp2|Trib3|Gprc5a|Dusp7|Ccnb1|Tigar|Rubcn	-1.128067673
BP	GO:0001933	negative regulation of protein phosphorylation	19_GO:0048519 negative regulation of biological process	-2.394944467	2.918006257	39	Abl1|Adora2a|Fabp4|Atf3|Bax|Cdkn1a|Cdkn1c|Cdkn2c|Efna1|Eng|Dmtn|Rack1|Ifng|Il1b|Itgb1bp1|Klf4|Lrp6|Smad7|Prkca|Plk1|Psen2|Rgs2|Sh3gl2|Slfn1|Coro1c|Gadd45g|Spry1|Sh2d1b1|Pbk|Chp1|Pmepa1|Rnf149|Ubash3b|Prdm15|Hexim1|Trib3|Gprc5a|Dusp7|Ccnb1	-1.020696423
CC	GO:0005741	mitochondrial outer membrane		-2.825288925	3.455327839	21	Arg1|Ass1|Bax|Bcl2a1d|Tspo|Lpin1|Gja1|Nme1|Mtch2|Rsad2|Fundc2|Mgarp|Rab32|Spire1|Agpat4|Aifm2|Bri3bp|Kmo|Miga2|Pde2a|Tigar	-1.318887377
CC	GO:0019867	outer membrane		-2.236614105	2.889918461	21	Arg1|Ass1|Bax|Bcl2a1d|Tspo|Lpin1|Gja1|Nme1|Mtch2|Rsad2|Fundc2|Mgarp|Rab32|Spire1|Agpat4|Aifm2|Bri3bp|Kmo|Miga2|Pde2a|Tigar	-0.911082038
CC	GO:0031968	organelle outer membrane		-2.236614105	2.889918461	21	Arg1|Ass1|Bax|Bcl2a1d|Tspo|Lpin1|Gja1|Nme1|Mtch2|Rsad2|Fundc2|Mgarp|Rab32|Spire1|Agpat4|Aifm2|Bri3bp|Kmo|Miga2|Pde2a|Tigar	-0.911082038
MF	GO:0002020	protease binding		-2.816905212	3.481437885	19	Anxa2|Cdk5r1|Col1a2|Cst3|Cstb|Ecm1|Fas|Fn1|Kit|Lcn2|Mif|Ryr1|Sell|Timp1|Ubc|Vwf|Bin1|Adamtsl4|Cstdc4	-1.313088746
BP	GO:0051090	regulation of DNA-binding transcription factor activity	19_GO:0008152 metabolic process	-2.803712976	3.270707986	40	Adam8|Anxa4|Capn3|Csf3|Ddit3|Fanca|Fzd4|Hes1|Hmga2|Id3|Il1b|Acod1|Jup|Kit|Klf4|Lrp6|Ltf|Smad7|Cd200|Pim1|Prox1|Sphk1|Bhlhe40|Tacc3|Cd40|Tnfrsf8|Traf1|Traf5|Trim26|Sigirr|Sufu|Tlr2|Siva1|Chp1|Rgcc|Mtdh|Tlr3|Trim41|Smo|Trim5	-1.301055369
BP	GO:0061061	muscle structure development	19_GO:0032502 developmental process	-2.801192209	3.194673947	61	Atf3|Capn3|Cdk1|Csrp1|Ddit3|Egr1|Ehd1|Eng|Erbb3|Gdf3|Gja1|Nr3c1|Hes1|Id3|Cxcl10|Igf2|Igfbp5|Kit|Lgals1|Lrp6|Smad3|Smad7|Mef2c|Cited2|Myl2|Pdgfb|Pik3r1|Pim1|Prox1|Qk|Rgs2|Ryr1|Ccl9|Sod2|Sdc1|Zeb1|Tgfbr1|Tgfbr2|Tmod1|Bin1|Tnfsf14|Usp2|Ramp2|Srpk3|Mbnl1|Cxcl14|Asb2|Ddx17|Pdlim7|Nmrk2|Hopx|Hdac9|Bcl9l|Unc45b|Myof|Dner|Tmem119|Ppp2r3a|Ccnb1|Eif5a|Smo	-1.301012751
BP	GO:0050931	pigment cell differentiation	19_GO:0043473 pigmentation	-2.775308831	3.887525018	8	Cd63|Kit|Mef2c|Sod2|Rab32|Mlph|Hps4|Mreg	-1.280043649
BP	GO:1905065	positive regulation of vascular smooth muscle cell differentiation	19_GO:0048518 positive regulation of biological process	-2.450098002	4.594024657	3	Eng|Kit|Sod2	-1.05865097
BP	GO:0048066	developmental pigmentation	19_GO:0043473 pigmentation	-2.402476115	3.373230546	9	Bax|Cd63|Kit|Mef2c|Sod2|Rab32|Mlph|Hps4|Mreg	-1.021473767
BP	GO:1905063	regulation of vascular smooth muscle cell differentiation	19_GO:0032502 developmental process	-2.130445216	3.609807294	4	Eng|Kit|Pdgfb|Sod2	-0.841356663
BP	GO:0048660	regulation of smooth muscle cell proliferation	19_GO:0008283 cell proliferation	-2.770832527	3.420774861	20	Ang|Apod|Cdkn1a|Egr1|Gja1|Hbegf|Hpgd|Ifng|Igfbp5|Klf4|Mef2c|Orc1|Pdgfb|Pik3r1|Prkca|Sod2|Tgfbr2|Tgm2|Thbs1|Calcrl	-1.276177738
BP	GO:0048659	smooth muscle cell proliferation	19_GO:0008283 cell proliferation	-2.615809341	3.274252423	20	Ang|Apod|Cdkn1a|Egr1|Gja1|Hbegf|Hpgd|Ifng|Igfbp5|Klf4|Mef2c|Orc1|Pdgfb|Pik3r1|Prkca|Sod2|Tgfbr2|Tgm2|Thbs1|Calcrl	-1.17013288
BP	GO:0033002	muscle cell proliferation	19_GO:0008283 cell proliferation	-2.489966246	3.09473772	25	Ang|Apod|Cdk1|Cdkn1a|Egr1|Gja1|Hbegf|Hpgd|Ifng|Igfbp5|Klf4|Mef2c|Cited2|Orc1|Pdgfb|Pik3r1|Pim1|Prkca|Sod2|Tgfbr1|Tgfbr2|Tgm2|Thbs1|Calcrl|Ccnb1	-1.085078492
BP	GO:0048662	negative regulation of smooth muscle cell proliferation	19_GO:0008283 cell proliferation	-2.458880035	3.439200953	9	Ang|Apod|Cdkn1a|Ifng|Igfbp5|Klf4|Mef2c|Pik3r1|Sod2	-1.061135258
BP	GO:0043062	extracellular structure organization	19_GO:0071840 cellular component organization or biogenesis	-2.76727265	3.267511634	35	Abl1|Anxa2|Col1a2|Eng|Fscn1|Fn1|Gfap|Pdpn|Lamb3|Lgals3|Lpl|Smad3|Mmp15|Soat1|Scarb1|Sdc1|Tgfbi|Tgfbr1|Ets1|Pla2g7|Prdx4|Ramp2|Mmp19|Smoc2|Rgcc|Noxo1|Clasp2|Exoc8|Papln|Adamts2|Soat2|Adamtsl4|Adamts16|Mpzl3|Col27a1	-1.273893491
BP	GO:0030198	extracellular matrix organization	19_GO:0071840 cellular component organization or biogenesis	-2.18231443	2.769423842	29	Abl1|Anxa2|Col1a2|Eng|Fscn1|Fn1|Gfap|Pdpn|Lamb3|Lgals3|Smad3|Mmp15|Tgfbi|Tgfbr1|Ets1|Prdx4|Ramp2|Mmp19|Smoc2|Rgcc|Noxo1|Clasp2|Exoc8|Papln|Adamts2|Adamtsl4|Adamts16|Mpzl3|Col27a1	-0.87814872
BP	GO:0051043	regulation of membrane protein ectodomain proteolysis	19_GO:0008152 metabolic process	-2.760875968	4.121126695	6	Adam8|Adra2a|Gpld1|Ifng|Il1b|Timp1	-1.270470075
BP	GO:0045833	negative regulation of lipid metabolic process	19_GO:0048519 negative regulation of biological process	-2.758379885	3.544912428	14	Adra2a|Apoc1|Apoc2|Apod|Gpld1|Il1b|Nfkb1|Pde3b|Pdgfb|Prox1|Sphk1|Hcar2|Trib3|Rubcn	-1.268577598
BP	GO:0051044	positive regulation of membrane protein ectodomain proteolysis	19_GO:0048518 positive regulation of biological process	-2.753166891	4.314809487	5	Adam8|Adra2a|Gpld1|Ifng|Il1b	-1.268163487
BP	GO:0050995	negative regulation of lipid catabolic process	19_GO:0048519 negative regulation of biological process	-2.560536298	3.852992874	6	Adra2a|Apoc1|Gpld1|Il1b|Pde3b|Hcar2	-1.132290487
BP	GO:0050994	regulation of lipid catabolic process	19_GO:0008152 metabolic process	-2.452295863	3.37614526	10	Adra2a|Apoc1|Apoc2|Gpld1|Hpgd|Il1b|Pde3b|Sct|Scarb1|Hcar2	-1.05865097
BP	GO:0033619	membrane protein proteolysis	19_GO:0008152 metabolic process	-2.34763004	3.308755657	9	Adam8|Adra2a|Gpld1|Ifng|Il1b|Napsa|Psen2|Timp1|Parl	-0.993048775
MF	GO:0030228	lipoprotein particle receptor activity		-2.753166891	4.314809487	5	Lrp6|Scarb1|Lsr|Cxcl16|Olr1	-1.268163487
BP	GO:0022617	extracellular matrix disassembly	19_GO:0071840 cellular component organization or biogenesis	-2.743014322	3.954992711	7	Eng|Fscn1|Pdpn|Ets1|Noxo1|Clasp2|Exoc8	-1.261862372
BP	GO:1903055	positive regulation of extracellular matrix organization	19_GO:0071840 cellular component organization or biogenesis	-2.100596823	3.360296199	5	Fscn1|Pdpn|Smad3|Rgcc|Clasp2	-0.82054568
BP	GO:0010715	regulation of extracellular matrix disassembly	19_GO:0071840 cellular component organization or biogenesis	-2.016158034	3.422926675	4	Fscn1|Pdpn|Ets1|Clasp2	-0.76157685
BP	GO:0045932	negative regulation of muscle contraction	19_GO:0048519 negative regulation of biological process	-2.743014322	3.954992711	7	Adora2b|Adra2a|Arg2|Rgs2|Bin1|Calcrl|Dock4	-1.261862372
BP	GO:0045986	negative regulation of smooth muscle contraction	19_GO:0048519 negative regulation of biological process	-2.288261013	3.635977431	5	Adora2b|Adra2a|Rgs2|Calcrl|Dock4	-0.949300414
BP	GO:0001777	T cell homeostatic proliferation	19_GO:0008283 cell proliferation	-2.731705881	5.14417927	3	Bax|Cd24a|Il2ra	-1.256207659
BP	GO:0002904	positive regulation of B cell apoptotic process	19_GO:0048518 positive regulation of biological process	-2.731705881	5.14417927	3	Bax|Cd24a|Fnip1	-1.256207659
BP	GO:0002902	regulation of B cell apoptotic process	19_GO:0050789 regulation of biological process	-2.658106721	3.848578472	7	Bax|Cd24a|Cd44|Mif|Aurkb|Hsh2d|Fnip1	-1.202804195
CC	GO:0046581	intercellular canaliculus		-2.726547466	4.587021985	4	Abcb4|Abcb1a|Tjp1|Mtdh	-1.256207659
MF	GO:0005548	phospholipid transporter activity		-2.458880035	3.439200953	9	Abcb4|Abcb1a|Plscr1|Atp8a2|Prelid1|Pitpnc1|Ano3|Ano8|Ano7	-1.061135258
BP	GO:2001269	positive regulation of cysteine-type endopeptidase activity involved in apoptotic signaling pathway	19_GO:0048518 positive regulation of biological process	-2.726547466	4.587021985	4	Bax|Fas|Smad3|Gsn	-1.256207659
BP	GO:0098908	regulation of neuronal action potential	19_GO:0023052 signaling	-2.726547466	4.587021985	4	Ifng|Gpr35|Kcnc4|Mtnr1b	-1.256207659
BP	GO:0051970	negative regulation of transmission of nerve impulse	19_GO:0048519 negative regulation of biological process	-2.226420272	4.158851146	3	Gpr35|Kcnc4|Mtnr1b	-0.91028977
BP	GO:0031645	negative regulation of neurological system process	19_GO:0048519 negative regulation of biological process	-2.003851709	3.096624659	6	Cacnb3|S1pr2|Ifng|Gpr35|Kcnc4|Mtnr1b	-0.752234969
BP	GO:0010216	maintenance of DNA methylation	19_GO:0008152 metabolic process	-2.726547466	4.587021985	4	Dnmt3a|Hells|Uhrf1|Kcnq1ot1	-1.256207659
CC	GO:0000323	lytic vacuole		-2.714439819	3.181247007	43	Acp5|Adam8|Gla|Prdx6|Ass1|Anxa2|Cd63|Cxcr4|Cst3|Cst7|Ctla2a|Ctsk|Fth1|Gfap|Gja1|Got1|Gzmb|H2-Aa|H2-DMb2|Hpse|Il1b|Napsa|P2ry2|Srgn|Psen2|Stx3|Calcrl|Ramp3|Ifi30|Ifitm3|Plbd1|Plekhf1|Tmem192|Lrba|Ffar4|Mcoln3|Hps4|Slc39a14|Fnip1|Slc2a6|Eva1a|Mreg|Rubcn	-1.247546812
CC	GO:0005764	lysosome		-2.714439819	3.181247007	43	Acp5|Adam8|Gla|Prdx6|Ass1|Anxa2|Cd63|Cxcr4|Cst3|Cst7|Ctla2a|Ctsk|Fth1|Gfap|Gja1|Got1|Gzmb|H2-Aa|H2-DMb2|Hpse|Il1b|Napsa|P2ry2|Srgn|Psen2|Stx3|Calcrl|Ramp3|Ifi30|Ifitm3|Plbd1|Plekhf1|Tmem192|Lrba|Ffar4|Mcoln3|Hps4|Slc39a14|Fnip1|Slc2a6|Eva1a|Mreg|Rubcn	-1.247546812
BP	GO:0032963	collagen metabolic process	19_GO:0008152 metabolic process	-2.669950316	3.427180773	15	Adora2b|Arg1|Col1a2|Ctsk|Eng|Fn1|Got1|Mmp15|Pdgfb|Vim|Prdx5|Mmp19|Rgcc|Vsir|Adamts2	-1.209869911
BP	GO:0010712	regulation of collagen metabolic process	19_GO:0008152 metabolic process	-2.34763004	3.308755657	9	Adora2b|Eng|Fn1|Got1|Pdgfb|Vim|Prdx5|Rgcc|Vsir	-0.993048775
BP	GO:0032964	collagen biosynthetic process	19_GO:0008152 metabolic process	-2.242367513	3.184039078	9	Adora2b|Arg1|Eng|Fn1|Got1|Pdgfb|Vim|Prdx5|Rgcc	-0.914764415
BP	GO:0032965	regulation of collagen biosynthetic process	19_GO:0008152 metabolic process	-2.19045054	3.179847039	8	Adora2b|Eng|Fn1|Got1|Pdgfb|Vim|Prdx5|Rgcc	-0.885497351
BP	GO:0097150	neuronal stem cell population maintenance	19_GO:0032502 developmental process	-2.657844375	3.98340164	6	Aspm|Hes1|Pcm1|Prox1|Sct|Hook3	-1.202804195
CC	GO:0000242	pericentriolar material		-2.100596823	3.360296199	5	Lck|Pcm1|Cep152|Bbs9|Hook3	-0.82054568
BP	GO:0007169	transmembrane receptor protein tyrosine kinase signaling pathway	19_GO:0023052 signaling	-2.654308786	3.098083982	52	Abl1|Adra2a|Angpt2|Apod|Areg|Cd63|Cdk5r1|Csf1r|Efna1|Efnb1|Eif4ebp1|Epha2|Erbb3|F7|Fgr|Flt3|Fzd4|Gpld1|Hbegf|Igf2|Igfbp5|Igfbp6|Il1b|Kit|Lck|Blnk|Mertk|Neurl1a|Pdgfb|Pgf|Pik3r1|Prkca|Plcg1|Psen2|Shcbp1|Sos1|Thbs1|Yes1|Spry1|Smoc2|Flrt3|Ubash3b|Mvb12a|Phf14|Clasp2|Fam20c|Glrx|Slc39a14|Csrnp1|Myof|Gprc5a|Ofd1	-1.199825037
BP	GO:0007096	regulation of exit from mitosis	19_GO:0071840 cellular component organization or biogenesis	-2.623266795	4.125432277	5	Birc5|Cdkn1c|Rgcc|Cdca5|Ube2c	-1.176100297
BP	GO:0010458	exit from mitosis	19_GO:0071840 cellular component organization or biogenesis	-2.298172343	3.499190527	6	Birc5|Cdkn1c|Rgcc|Cdca5|Ube2c|Clasp2	-0.953203621
BP	GO:1905517	macrophage migration	19_GO:0040011 locomotion	-2.612469411	3.556217558	10	Ccr2|Ccr7|Csf1r|Lgals3|Mif|Cd200|Thbs1|Gpr35|P2ry12|Mtus1	-1.168967144
BP	GO:0002040	sprouting angiogenesis	19_GO:0032502 developmental process	-2.600916898	3.333742586	16	Abl1|Eng|Epha2|Glul|Gpld1|Itga5|Itgb1bp1|Klf4|Pgf|Pkm|S100a1|Thbs1|Tjp1|Aplnr|Ramp2|Hdac9	-1.159759205
BP	GO:1903672	positive regulation of sprouting angiogenesis	19_GO:0048518 positive regulation of biological process	-2.428709397	3.471812186	8	Abl1|Itga5|Klf4|Pkm|S100a1|Tjp1|Aplnr|Hdac9	-1.042995708
BP	GO:1903670	regulation of sprouting angiogenesis	19_GO:0032502 developmental process	-2.370616026	3.239893469	11	Abl1|Glul|Itga5|Itgb1bp1|Klf4|Pkm|S100a1|Thbs1|Tjp1|Aplnr|Hdac9	-1.009356601
BP	GO:0002088	lens development in camera-type eye	19_GO:0032502 developmental process	-2.600558946	3.415378886	13	Cdkn1c|Epha2|Gja1|Smad3|Cited2|Pou2f1|Prox1|Sox1|Tgfbr1|Tgfbr2|Tmod1|Vim|Spry1	-1.159759205
BP	GO:0070306	lens fiber cell differentiation	19_GO:0032502 developmental process	-2.352602959	3.462041005	7	Cdkn1c|Epha2|Smad3|Prox1|Tmod1|Vim|Spry1	-0.996250868
BP	GO:0070307	lens fiber cell development	19_GO:0032502 developmental process	-2.016158034	3.422926675	4	Epha2|Prox1|Tmod1|Vim	-0.76157685
BP	GO:1905144	response to acetylcholine	19_GO:0050896 response to stimulus	-2.576844433	3.746362721	7	Cdk5r1|Ly6c1|Rock2|Ly6i|Ly6a|Atp2b4|Ly6c2	-1.143603724
BP	GO:1905145	cellular response to acetylcholine	19_GO:0050896 response to stimulus	-2.576844433	3.746362721	7	Cdk5r1|Ly6c1|Rock2|Ly6i|Ly6a|Atp2b4|Ly6c2	-1.143603724
MF	GO:0030547	receptor inhibitor activity		-2.498983289	3.64804434	7	Angpt2|Il1rn|Ly6c1|Ly6i|Dut|Ly6a|Ly6c2	-1.091367758
MF	GO:0030550	acetylcholine receptor inhibitor activity		-2.016158034	3.422926675	4	Ly6c1|Ly6i|Ly6a|Ly6c2	-0.76157685
MF	GO:0005164	tumor necrosis factor receptor binding		-2.576844433	3.746362721	7	Ltb|Tnfsf9|Traf1|Traf5|Siva1|Tnfsf14|Tnfsf13	-1.143603724
BP	GO:0001666	response to hypoxia	19_GO:0050896 response to stimulus	-2.568380893	3.189529703	23	Adam8|Ang|Cd24a|Cd38|Egr1|Eif4ebp1|Eng|Itpr2|Smad3|Cited2|Nos2|Pgf|Pgk1|Rock2|Ryr1|Sox4|Tacc3|Limd1|Rgcc|Mgarp|Ddah1|Egln3|Tigar	-1.137173321
BP	GO:0097191	extrinsic apoptotic signaling pathway	19_GO:0023052 signaling	-2.563817674	3.163774709	25	Atf3|Bax|Bcl2a1d|Erbb3|Eya1|Eya4|Fas|Ifng|Il1b|Lcn2|Lgals3|Smad3|Pik3r1|Ppp1ca|Psen2|Rock2|Tgfbr1|Thbs1|Cd27|Traf1|Siva1|Il33|Tlr3|Peli3|Tnfrsf26	-1.13313684
BP	GO:0048873	homeostasis of number of cells within a tissue	19_GO:0032501 multicellular organismal process	-2.560161642	3.630558601	8	Bax|Cd7|Ccr2|Flt3|Prdx5|Klhl10|Tex15|Smo	-1.132290487
BP	GO:0014070	response to organic cyclic compound	19_GO:0050896 response to stimulus	-2.552082209	2.986264509	62	Adora2a|Areg|Ass1|Cdkn2d|Cyp7b1|Dhfr|Egr1|Eif4ebp1|Dmtn|F7|Fas|Gpld1|Nr3c1|Hmga2|Id3|Ifit3|Igf2|Igfbp5|Il1b|Il1rn|Acod1|Itpr2|Jup|Lrp6|Mef2c|Nfkb1|Nos2|Pdgfb|Padi2|Abcb4|Pik3r1|Pim1|Prkca|Ptger2|Rad51|Rock2|Ryr1|Saa3|Sell|Spp1|Tgfbr1|Tgfbr2|Trim24|Trpc3|Nr1h3|Usp18|Slc7a11|Ramp3|Ddx17|Mgarp|P2ry12|Rftn1|Glrx|Acsbg1|Nr3c2|Tlr3|Ggt7|Pde2a|Nrip1|Smo|Atp2b4|Gm13283	-1.128511262
BP	GO:0009725	response to hormone	19_GO:0050896 response to stimulus	-2.26532553	2.742630806	59	Adora2b|Adra2a|Ang|Anxa5|Areg|Ass1|Cd38|Cdk5r1|Ccr7|Cyp7b1|Egr1|Eif4ebp1|Fas|Lpin1|Gpld1|Nr3c1|Cfb|Hmga2|Igf2|Il1b|Il1rn|Acod1|Eif6|Kit|Lpl|Ly6c1|Mef2c|Rab8a|Nfkb1|Nos2|Pde3b|Padi2|Pik3r1|Pkm|Prkca|Pld1|Ptger2|Rock2|Serpina3g|Serpina3n|Spp1|Timp1|Nr1h3|Ramp2|Ramp3|Ly6i|Ddx17|Mgarp|Hdac9|Glrx|Acsbg1|Ly6a|Nr3c2|Ggt7|Slc39a14|Trib3|Nrip1|Atp2b4|Ly6c2	-0.930183862
BP	GO:1901857	positive regulation of cellular respiration	19_GO:0048518 positive regulation of biological process	-2.550850049	4.298273851	4	Cdk1|Ifng|Prelid1|Ccnb1	-1.128511262
BP	GO:0060043	regulation of cardiac muscle cell proliferation	19_GO:0040007 growth	-2.03044104	2.979995024	8	Cdk1|Gja1|Mef2c|Cited2|Pim1|Tgfbr1|Tgfbr2|Ccnb1	-0.769616014
BP	GO:0019216	regulation of lipid metabolic process	19_GO:0008152 metabolic process	-2.545402927	3.072892567	35	Adora2b|Adra2a|Apoc1|Apoc2|Apod|Tspo|Egr1|Fabp3|Fgr|Gpld1|Nr3c1|Hpgd|Ifng|Igf2|Il1b|Eif6|Kit|Fabp5|Nfkb1|Pde3b|Pdgfb|Pik3r1|Prox1|Sct|Sphk1|Scarb1|Nr1h3|Vav2|Lsr|Angptl4|Mid1ip1|Hcar2|Trib3|Zfp69|Rubcn	-1.125124853
BP	GO:0046890	regulation of lipid biosynthetic process	19_GO:0008152 metabolic process	-2.224299882	2.889159371	20	Adora2b|Apoc2|Tspo|Egr1|Fabp3|Gpld1|Nr3c1|Ifng|Igf2|Il1b|Eif6|Fabp5|Nfkb1|Pdgfb|Prox1|Sphk1|Scarb1|Nr1h3|Mid1ip1|Trib3	-0.908573563
BP	GO:0002009	morphogenesis of an epithelium	19_GO:0032502 developmental process	-2.53405257	3.001584945	50	Abl1|Areg|Rhob|Ctnnd1|Cd44|Cxcr4|Coq7|Cyp7b1|Eng|Epha2|Eya1|Gja1|Pdpn|Nr3c1|Hbegf|Hes1|Hmga2|Cxcl10|Igfbp5|Itgax|Klf4|Lrp6|Smad3|Mef2c|Cited2|Numb|Pdgfb|Pgf|Ppp1ca|Prox1|Rock2|Sos1|Sox4|Tgfbr2|Tgm2|Timeless|Spry1|Sufu|Clic4|Flrt3|Sapcd2|Arhgap12|Clasp2|Ophn1|Ajap1|Setd2|Adamts16|Smo|Cecr2|Brsk1	-1.114801198
BP	GO:0048729	tissue morphogenesis	19_GO:0032502 developmental process	-2.263623634	2.747403852	56	Abl1|Macf1|Adam8|Areg|Rhob|Ctnnd1|Cd44|Cxcr4|Coq7|Cyp7b1|Eng|Epha2|Eya1|Gja1|Pdpn|Nr3c1|Hbegf|Hes1|Hmga2|Cxcl10|Igfbp5|Itgax|Klf4|Lrp6|Smad3|Smad7|Mef2c|Cited2|Myl2|Numb|Pdgfb|Pgf|Ppp1ca|Prox1|Rock2|Sos1|Sox4|Tgfbr1|Tgfbr2|Tgm2|Timeless|Spry1|Sufu|Clic4|Flrt3|Sapcd2|Arhgap12|Clasp2|Tbx19|Ophn1|Ajap1|Setd2|Adamts16|Smo|Cecr2|Brsk1	-0.928904226
CC	GO:0043235	receptor complex		-2.527513945	3.041513521	38	Acvr2b|Adra2a|Cd44|Csf1r|Eng|Epha2|Erbb3|Flt3|Il2rg|Il3ra|Itga5|Itgax|Itgb2l|Itgb7|Itpr2|Kit|Klrd1|Smad3|Mertk|Tgfbr1|Tgfbr2|Cd40|Traf1|Traf5|Nr1h3|Vipr1|Tlr2|Ramp2|Calcrl|Ramp3|Plxdc1|Itga9|Olr1|Nr3c2|Gpr37l1|Gprc5a|Plxna4|Scimp	-1.11024072
MF	GO:0051219	phosphoprotein binding		-2.513053199	3.294203085	14	Abl1|Cbx4|Cd44|Fgr|Lck|Pde3b|Pik3r1|Plcg1|Vav2|Yes1|Sh2d1b1|Dpys|Ubash3b|Rasa1	-1.09991158
MF	GO:0001784	phosphotyrosine residue binding		-2.366216073	3.395800522	8	Abl1|Fgr|Lck|Pik3r1|Vav2|Yes1|Sh2d1b1|Rasa1	-1.006747555
BP	GO:0040008	regulation of growth	19_GO:0040007 growth	-2.494975708	2.939846959	61	Abl1|Capn3|Ccnb2|Cd38|Cd44|Cdk1|Cdk5r1|Cdkn1a|Cdkn2c|Cdkn2d|Cxcr4|Flt3|Fn1|Fxn|Gja1|Rack1|Nr3c1|Hbegf|Hmga2|Ifng|Igf2|Igfbp5|Il3ra|Smad3|Smad7|Mef2c|Cited2|Map1b|Myl2|Osm|Pim1|Prox1|Rgs2|Selenop|Itsn2|Sphk1|Stc2|Tgfbr1|Tgfbr2|Wrn|Mgll|Nubp1|Ulk2|Atp8a2|Cxcl16|Ist1|Hopx|Dcstamp|Rftn1|Clasp2|Sh3bp4|Sema6d|Plac8|Ppp2r3a|Zc3h12d|Tspyl5|Plxna4|Ccnb1|Smo|Dnph1|Prdm11	-1.08785908
BP	GO:0016049	cell growth	19_GO:0040007 growth	-2.161646103	2.681436146	45	Abl1|Cd38|Cd44|Cdk5r1|Cdkn1a|Cdkn2c|Cdkn2d|Cxcr4|Emp1|Emp3|Fn1|Fxn|Gja1|Rack1|Nr3c1|Hbegf|Hsp90aa1|Igfbp5|Il3ra|Smad3|Smad7|Map1b|Myl2|Rgs2|Itsn2|Sh3gl2|Sphk1|Aurka|Tgfbr1|Tgfbr2|Mgll|Nubp1|Ulk2|Cxcl16|Flrt3|Ist1|Dcstamp|Clasp2|Sh3bp4|Sema6d|Zc3h12d|Plxna4|Smo|Dnph1|Prdm11	-0.859834299
BP	GO:0034123	positive regulation of toll-like receptor signaling pathway	19_GO:0002376 immune system process	-2.468442173	3.729209827	6	Ltf|Nr1h3|Tlr2|Mfhas1|Rsad2|Tlr3	-1.068250661
BP	GO:0002371	dendritic cell cytokine production	19_GO:0002376 immune system process	-2.130445216	3.609807294	4	Kit|Tlr2|Tlr3|Scimp	-0.841356663
MF	GO:0000405	bubble DNA binding		-2.450098002	4.594024657	3	Abl1|Wrn|Ercc5	-1.05865097
BP	GO:0010046	response to mycotoxin	19_GO:0050896 response to stimulus	-2.450098002	4.594024657	3	Ass1|Egr1|Pdgfb	-1.05865097
BP	GO:1902895	positive regulation of pri-miRNA transcription by RNA polymerase II	19_GO:0048518 positive regulation of biological process	-2.428709397	3.471812186	8	Egr1|Nr3c1|Klf4|Smad3|Nfkb1|Pdgfb|Tgfbr1|Ets1	-1.042995708
BP	GO:0061614	pri-miRNA transcription by RNA polymerase II	19_GO:0008152 metabolic process	-2.191837738	3.123680141	9	Egr1|Nr3c1|Klf4|Smad3|Nfkb1|Pdgfb|Tgfbr1|Ets1|Ddx17	-0.885642581
BP	GO:0010754	negative regulation of cGMP-mediated signaling	19_GO:0048519 negative regulation of biological process	-2.450098002	4.594024657	3	Thbs1|Pde2a|Mtnr1b	-1.05865097
CC	GO:0097427	microtubule bundle		-2.450098002	4.594024657	3	Tppp3|Tppp|Atat1	-1.05865097
BP	GO:0000086	G2/M transition of mitotic cell cycle	19_GO:0009987 cellular process	-2.445967945	3.199587753	15	Birc5|Calm3|Ccna2|Cdc25b|Cdk1|Cdc7|Cdkn1a|Hspa2|Lmnb1|Orc1|Abcb1a|Plk1|Gpr132|Ccnb1|Brsk1	-1.05596136
BP	GO:0010971	positive regulation of G2/M transition of mitotic cell cycle	19_GO:0048518 positive regulation of biological process	-2.38111754	3.611451187	6	Cdc25b|Cdk1|Cdc7|Hspa2|Lmnb1|Ccnb1	-1.017212825
BP	GO:1901992	positive regulation of mitotic cell cycle phase transition	19_GO:0048518 positive regulation of biological process	-2.275443339	3.098897778	12	Birc5|Cdc25b|Cdk1|Cdc7|Hspa2|Lmnb1|Rgcc|Cdt1|Cdca5|Ube2c|Mepce|Ccnb1	-0.93818419
BP	GO:1902751	positive regulation of cell cycle G2/M phase transition	19_GO:0048518 positive regulation of biological process	-2.144082243	3.289364143	6	Cdc25b|Cdk1|Cdc7|Hspa2|Lmnb1|Ccnb1	-0.848871376
MF	GO:0004620	phospholipase activity		-2.434256691	3.240209699	13	Prdx6|Ccr1|Gpld1|Lpl|Pla2g2d|Plcg1|Pld1|Pla2g7|Plbd1|Pla1a|Plcl2|Plcl1|Liph	-1.047116747
BP	GO:0033081	regulation of T cell differentiation in thymus	19_GO:0002376 immune system process	-2.424302753	3.553352117	7	Adam8|Il1b|Il2rg|Sos1|Zeb1|Zc3h8|Ankle1	-1.040483481
CC	GO:0019897	extrinsic component of plasma membrane		-2.418757765	3.07030652	21	Anxa2|Ctnnd1|Cdh15|Eno1|Fcnb|Fgr|Gna15|Gnb4|Jup|Lck|Smad7|Numb|Ryr1|S100a10|S100a6|Cdh23|Yes1|Racgap1|Gng13|Gng11|Olr1	-1.035882612
BP	GO:1903317	regulation of protein maturation	19_GO:0008152 metabolic process	-2.39902587	3.234384089	12	Cd5l|Ctnnd1|Cfh|Cst7|Ctla2a|Il1b|Il1r2|Sox4|Thbs1|Chac1|Gsn|Spon1	-1.020696423
BP	GO:0070613	regulation of protein processing	19_GO:0008152 metabolic process	-2.076022368	2.905438516	11	Cd5l|Ctnnd1|Cfh|Cst7|Ctla2a|Il1b|Il1r2|Thbs1|Chac1|Gsn|Spon1	-0.801137483
BP	GO:0051604	protein maturation	19_GO:0008152 metabolic process	-2.068041765	2.656617752	29	Ambp|Cd5l|Ctnnd1|Cfh|Cst7|Ctla2a|Ctse|F7|Fxn|Il1b|Il1r2|Pgk1|Srgn|Psen2|Sox4|Thbs1|Prdx4|Naa16|Asprv1|Gcsh|Ciao2a|Aph1c|Chst8|Chac1|Vsir|Tspan17|Adamts2|Gsn|Spon1	-0.795723422
MF	GO:0015250	water channel activity		-2.39531027	4.043205276	4	Aqp4|Pdpn|Aqp9|Aqp11	-1.020696423
MF	GO:0005372	water transmembrane transporter activity		-2.130445216	3.609807294	4	Aqp4|Pdpn|Aqp9|Aqp11	-0.841356663
BP	GO:2000402	negative regulation of lymphocyte migration	19_GO:0040011 locomotion	-2.39531027	4.043205276	4	Apod|Gcsam|Cd200|Padi2	-1.020696423
BP	GO:0002686	negative regulation of leukocyte migration	19_GO:0040011 locomotion	-2.032978588	3.049092915	7	Apod|Gcsam|Mif|Cd200|Padi2|Il33|Gpr18	-0.771134383
BP	GO:0045348	positive regulation of MHC class II biosynthetic process	19_GO:0048518 positive regulation of biological process	-2.39531027	4.043205276	4	Cdk5r1|Ifng|Il33|Tmem106a	-1.020696423
BP	GO:0014745	negative regulation of muscle adaptation	19_GO:0048519 negative regulation of biological process	-2.39531027	4.043205276	4	Igfbp5|Klf4|Smad3|Atp2b4	-1.020696423
CC	GO:0043186	P granule		-2.391940069	3.787714965	5	Ddx4|Ddx3y|Carhsp1|Piwil2|Helz	-1.020696423
CC	GO:0060293	germ plasm		-2.391940069	3.787714965	5	Ddx4|Ddx3y|Carhsp1|Piwil2|Helz	-1.020696423
CC	GO:0045495	pole plasm		-2.288261013	3.635977431	5	Ddx4|Ddx3y|Carhsp1|Piwil2|Helz	-0.949300414
BP	GO:0045837	negative regulation of membrane potential	19_GO:0065007 biological regulation	-2.391940069	3.787714965	5	Bax|Il1rn|Ltf|Mtch2|Prelid1	-1.020696423
BP	GO:0042306	regulation of protein import into nucleus	19_GO:0051179 localization	-2.370616026	3.239893469	11	Apod|Cdk1|Ect2|Hsp90aa1|Ifng|Jup|Mdfic|Pik3r1|Ran|Chp1|Smo	-1.009356601
BP	GO:1904589	regulation of protein import	19_GO:0051179 localization	-2.115541542	2.951075315	11	Apod|Cdk1|Ect2|Hsp90aa1|Ifng|Jup|Mdfic|Pik3r1|Ran|Chp1|Smo	-0.829859238
CC	GO:1990752	microtubule end		-2.352602959	3.462041005	7	Aspm|Knstrn|Spag5|Kif2c|Clasp2|Mlph|Nav3	-0.996250868
BP	GO:0007623	circadian rhythm	19_GO:0048511 rhythmic process	-2.338910446	2.969848783	23	Adora2a|Ass1|Cdk1|Cyp7b1|Egr1|Fas|Id3|Nfil3|Nos2|Oprl1|Ppp1ca|Prox1|Rock2|Bhlhe40|Timeless|Usp2|Piwil2|Huwe1|Sfpq|Mycbp2|Mtnr1b|Nrip1|Ahcy	-0.986092816
BP	GO:1901136	carbohydrate derivative catabolic process	19_GO:0008152 metabolic process	-2.307411244	3.055401624	15	Gla|Cd44|Chil3|Cst3|Hint1|Hpse|Pglyrp1|Upp1|Nt5c|Acot7|Cela1|Dut|Pde2a|Amdhd2|Ahcy	-0.958603121
BP	GO:0061098	positive regulation of protein tyrosine kinase activity	19_GO:0048518 positive regulation of biological process	-2.305737904	3.321872572	8	Adra2a|Areg|Csf1r|Efna1|Erbb3|Hbegf|Neurl1a|Pdgfb	-0.958603121
BP	GO:0061097	regulation of protein tyrosine kinase activity	19_GO:0008152 metabolic process	-2.282008633	3.140617683	11	Adra2a|Areg|Csf1r|Efna1|Erbb3|Hbegf|Neurl1a|Pdgfb|Psen2|Rap2b|Gprc5a	-0.943899592
BP	GO:0045741	positive regulation of epidermal growth factor-activated receptor activity	19_GO:0048518 positive regulation of biological process	-2.256114687	3.815331706	4	Adra2a|Areg|Hbegf|Neurl1a	-0.925177258
BP	GO:0007176	regulation of epidermal growth factor-activated receptor activity	19_GO:0023052 signaling	-2.219262356	3.391964658	6	Adra2a|Areg|Hbegf|Neurl1a|Psen2|Gprc5a	-0.905551328
BP	GO:2000273	positive regulation of signaling receptor activity	19_GO:0023052 signaling	-2.092206271	3.126456979	7	Adra2a|Adra2b|Arc|Areg|Hbegf|Ifng|Neurl1a	-0.815109355
CC	GO:0022627	cytosolic small ribosomal subunit		-2.305737904	3.321872572	8	Rack1|Rpsa|Rps2|Rps16|Rps18|Rps5|Hba-a2|Isg15	-0.958603121
BP	GO:0060039	pericardium development	19_GO:0032502 developmental process	-2.298172343	3.499190527	6	Pdpn|Lrp6|Smad3|Sos1|Flrt3|Setd2	-0.953203621
BP	GO:0001946	lymphangiogenesis	19_GO:0032502 developmental process	-2.288261013	3.635977431	5	Acvr2b|Epha2|Pdpn|Ngp|Prox1	-0.949300414
BP	GO:0060836	lymphatic endothelial cell differentiation	19_GO:0032502 developmental process	-2.226420272	4.158851146	3	Acvr2b|Pdpn|Prox1	-0.91028977
BP	GO:0036303	lymph vessel morphogenesis	19_GO:0032502 developmental process	-2.015289947	3.234364754	5	Acvr2b|Epha2|Pdpn|Ngp|Prox1	-0.76157685
CC	GO:0099091	postsynaptic specialization, intracellular component		-2.283702193	3.37388895	7	Ctnnd1|Nr3c1|Lck|Srgn|Yes1|Tanc2|Nr3c2	-0.945167582
BP	GO:0032060	bleb assembly	19_GO:0071840 cellular component organization or biogenesis	-2.256114687	3.815331706	4	Prdx6|Emp1|Emp3|Anln	-0.925177258
BP	GO:0033280	response to vitamin D	19_GO:0050896 response to stimulus	-2.256114687	3.815331706	4	Cdkn2d|Pim1|Spp1|Trim24	-0.925177258
BP	GO:0007584	response to nutrient	19_GO:0050896 response to stimulus	-2.169793847	2.953904437	13	Cdkn2d|Il1b|Lpl|Lrp6|Pim1|Ryr1|Sell|Spp1|Trim24|Trpc3|Usf2|P2ry12|Ahcy	-0.866806685
CC	GO:0042581	specific granule		-2.256114687	3.815331706	4	Adam8|Ltf|Stx3|Vamp1	-0.925177258
BP	GO:0042775	mitochondrial ATP synthesis coupled electron transport	19_GO:0008152 metabolic process	-2.242367513	3.184039078	9	Cdk1|Coq7|Cox4i1|Cox6a2|ND2|Uqcrq|Mtch2|Ndufb8|Ccnb1	-0.914764415
BP	GO:0022904	respiratory electron transport chain	19_GO:0008152 metabolic process	-2.115541542	2.951075315	11	Cdk1|Coq7|Cox4i1|Cox6a2|ND2|Slc1a3|Sod2|Uqcrq|Mtch2|Ndufb8|Ccnb1	-0.829859238
BP	GO:0042773	ATP synthesis coupled electron transport	19_GO:0008152 metabolic process	-2.048038537	2.94996718	9	Cdk1|Coq7|Cox4i1|Cox6a2|ND2|Uqcrq|Mtch2|Ndufb8|Ccnb1	-0.777908081
MF	GO:0001609	G protein-coupled adenosine receptor activity		-2.226420272	4.158851146	3	Adora2a|Adora2b|P2ry12	-0.91028977
BP	GO:0055093	response to hyperoxia	19_GO:0050896 response to stimulus	-2.226420272	4.158851146	3	Fas|Pdpn|Sod2	-0.91028977
BP	GO:0006531	aspartate metabolic process	19_GO:0008152 metabolic process	-2.226420272	4.158851146	3	Adssl1|Ass1|Got1	-0.91028977
BP	GO:0071353	cellular response to interleukin-4	19_GO:0050896 response to stimulus	-2.219262356	3.391964658	6	Rps2|Mcm2|Mrc1|Nfil3|Dcstamp|Cd300lf	-0.905551328
BP	GO:0070670	response to interleukin-4	19_GO:0050896 response to stimulus	-2.072359886	3.191025483	6	Rps2|Mcm2|Mrc1|Nfil3|Dcstamp|Cd300lf	-0.798943453
BP	GO:0001516	prostaglandin biosynthetic process	19_GO:0008152 metabolic process	-2.219262356	3.391964658	6	Il1b|Fabp5|Mif|Sphk1|Hpgds|Ptges	-0.905551328
BP	GO:0046457	prostanoid biosynthetic process	19_GO:0008152 metabolic process	-2.219262356	3.391964658	6	Il1b|Fabp5|Mif|Sphk1|Hpgds|Ptges	-0.905551328
BP	GO:0006692	prostanoid metabolic process	19_GO:0008152 metabolic process	-2.135468979	3.111557654	8	Pdpn|Hpgd|Il1b|Fabp5|Mif|Sphk1|Hpgds|Ptges	-0.841891454
BP	GO:0006693	prostaglandin metabolic process	19_GO:0008152 metabolic process	-2.135468979	3.111557654	8	Pdpn|Hpgd|Il1b|Fabp5|Mif|Sphk1|Hpgds|Ptges	-0.841891454
BP	GO:0006284	base-excision repair	19_GO:0050896 response to stimulus	-2.217434748	3.288694169	7	Hmga2|Pole|Ung|Wrn|Huwe1|Polq|Dna2	-0.904928421
BP	GO:0045005	DNA-dependent DNA replication maintenance of fidelity	19_GO:0008152 metabolic process	-2.092206271	3.126456979	7	Pole|Rad51|Timeless|Wrn|Etaa1|Eme1|Dna2	-0.815109355
MF	GO:0043394	proteoglycan binding		-2.217434748	3.288694169	7	Cfh|Ctsk|Fn1|Hpse|Lpl|Pla2g2d|Gpnmb	-0.904928421
MF	GO:0005539	glycosaminoglycan binding		-2.063209542	2.703006929	22	Ang|Cd44|Cfh|Eng|Fn1|Adgrg1|Hbegf|Cxcl10|Lpl|Ltf|Pla2g2d|Ccl7|Tgfbr2|Thbs1|Pglyrp1|Tlr2|Smoc2|Nav2|Gpnmb|Rtn4rl1|Liph|Layn	-0.79162172
MF	GO:0030676	Rac guanyl-nucleotide exchange factor activity		-2.191384679	3.493863051	5	Ect2|Eps8l1|Arhgef4|Dock4|Prex1	-0.885642581
BP	GO:0031570	DNA integrity checkpoint	19_GO:0048519 negative regulation of biological process	-2.153527109	2.912412031	14	Cdk1|Cdkn1a|E2f1|Orc1|Plk1|Sox4|Timeless|Trp53bp1|Ppp1r10|Cdt1|Etaa1|Eme1|Dna2|Brsk1	-0.854056521
MF	GO:0043015	gamma-tubulin binding		-2.144082243	3.289364143	6	Ndrg1|Nme1|Racgap1|Ofd1|Brsk1|Pifo	-0.848871376
BP	GO:0035791	platelet-derived growth factor receptor-beta signaling pathway	19_GO:0023052 signaling	-2.130445216	3.609807294	4	Abl1|Pdgfb|Clasp2|Glrx	-0.841356663
BP	GO:0002756	MyD88-independent toll-like receptor signaling pathway	19_GO:0002376 immune system process	-2.130445216	3.609807294	4	Cd40|Irf7|Tlr3|Cd300lf	-0.841356663
BP	GO:0034248	regulation of cellular amide metabolic process	19_GO:0008152 metabolic process	-2.120990081	2.670165459	37	Ang|Dhfr|Efna1|Eif4ebp1|Gfap|Rack1|Ifng|Igfbp5|Eif6|Neurl1a|Pkm|Prkca|Pld1|Ppp1ca|Qk|Rgs2|Rock2|S100a9|Sox4|Sphk1|Thbs1|Tob1|Tyms|Vim|Slc7a11|Bin1|Piwil2|Rmnd1|Rpl38|Mif4gd|Eif3k|Tnrc6c|Spon1|Zc3h12d|Bank1|Eif5a|Tigar	-0.834079979
BP	GO:0034249	negative regulation of cellular amide metabolic process	19_GO:0048519 negative regulation of biological process	-2.045666011	2.728592625	18	Ang|Dhfr|Eif4ebp1|Rack1|Igfbp5|Eif6|Prkca|Qk|Rgs2|Rock2|Sphk1|Tob1|Tyms|Bin1|Tnrc6c|Spon1|Zc3h12d|Bank1	-0.777607555
BP	GO:0007369	gastrulation	19_GO:0032502 developmental process	-2.109410811	2.783129687	19	Macf1|Acvr2b|Epha2|Eya1|Fn1|Gdf3|Gja1|Rack1|Il1rn|Itga5|Klf4|Lrp6|Smad3|Tgfbr2|Aplnr|Clasp2|Tbx19|Tnrc6c|Setd2	-0.824858013
CC	GO:0010008	endosome membrane		-2.1057615	2.737581914	23	Anxa8|Rhob|Anxa2|Cd63|Ehd1|H2-DMb2|Rab8a|Mrc1|Myo1b|Ndrg1|Sphk1|Coro1c|Cd274|Pmepa1|Tbc1d5|Mvb12a|Rap2b|Dcstamp|Slc9b2|Ffar4|Slc39a14|Zfyve16|Mreg	-0.821960076
BP	GO:0006898	receptor-mediated endocytosis	19_GO:0051179 localization	-2.104958842	2.728245499	24	Apoc2|Arc|Anxa2|Cd63|Ccr7|Lrp6|Mrc1|Numb|Prkca|Msr1|Itsn2|Sh3gl2|Tgfbr2|Ramp2|Calcrl|Ramp3|Cxcl16|Ifitm3|Tbc1d5|Fcho1|Ophn1|Slc9b2|Bmp2k|Fchsd2	-0.821907495
BP	GO:2000353	positive regulation of endothelial cell apoptotic process	19_GO:0048518 positive regulation of biological process	-2.100596823	3.360296199	5	Plcg1|Thbs1|Cd40|Rgcc|Ecscr	-0.82054568
BP	GO:0032148	activation of protein kinase B activity	19_GO:0048518 positive regulation of biological process	-2.100596823	3.360296199	5	Adra2a|Adra2b|Ang|Itgb1bp1|Pdgfb	-0.82054568
BP	GO:0044273	sulfur compound catabolic process	19_GO:0008152 metabolic process	-2.100596823	3.360296199	5	Chac1|Acot7|Ggt7|Csad|Ahcy	-0.82054568
BP	GO:0051187	cofactor catabolic process	19_GO:0008152 metabolic process	-2.002546911	2.894358659	9	Prdx6|Prdx1|Prdx4|Prdx5|Chac1|Acot7|Cyp4f18|Ggt7|Ahcy	-0.751974567
BP	GO:0042092	type 2 immune response	19_GO:0002376 immune system process	-2.092206271	3.126456979	7	Arg1|Arg2|Ccr2|Ecm1|Lilrb4a|Rsad2|Il33	-0.815109355
BP	GO:0002724	regulation of T cell cytokine production	19_GO:0002376 immune system process	-2.072359886	3.191025483	6	Arg1|Ccr2|Il1b|Smad7|Rsad2|Vsir	-0.798943453
BP	GO:0002828	regulation of type 2 immune response	19_GO:0002376 immune system process	-2.072359886	3.191025483	6	Arg1|Arg2|Ccr2|Ecm1|Rsad2|Il33	-0.798943453
BP	GO:1903035	negative regulation of response to wounding	19_GO:0048519 negative regulation of biological process	-2.084366539	2.884918273	12	Anxa5|Anxa2|Cd24a|Cdkn1a|Gja1|Smad3|Pdgfb|Thbs1|Ubash3b|Clasp2|Ajap1|Rtn4rl1	-0.808008219
BP	GO:1905603	regulation of maintenance of permeability of blood-brain barrier	19_GO:0050789 regulation of biological process	-2.041598195	3.801951702	3	Sh3gl2|Tjp1|Tjp3	-0.777607555
CC	GO:0031390	Ctf18 RFC-like complex		-2.041598195	3.801951702	3	Rfc5|Rfc4|Chtf18	-0.777607555
BP	GO:0051541	elastin metabolic process	19_GO:0008152 metabolic process	-2.041598195	3.801951702	3	Cst3|Hbegf|Cela1	-0.777607555
MF	GO:0019206	nucleoside kinase activity		-2.041598195	3.801951702	3	Dck|Tk1|Uck2	-0.777607555
CC	GO:0097450	astrocyte end-foot		-2.041598195	3.801951702	3	Aqp4|Gfap|Adgrg1	-0.777607555
BP	GO:0034238	macrophage fusion	19_GO:0032502 developmental process	-2.041598195	3.801951702	3	Cd44|Ocstamp|Dcstamp	-0.777607555
MF	GO:0030235	nitric-oxide synthase regulator activity		-2.041598195	3.801951702	3	Calm3|Hsp90aa1|Atp2b4	-0.777607555
BP	GO:0030183	B cell differentiation	19_GO:0002376 immune system process	-2.035053142	2.730898897	17	Abl1|Bax|Cd24a|Flt3|H2-Ab1|Hmgb3|Il2rg|Kit|Lgals1|Pik3r1|Cd27|Hdac9|Dock10|Fnip1|Plcl2|Ankle1|Gm13283	-0.772137046
MF	GO:0070679	inositol 1,4,5 trisphosphate binding		-2.016158034	3.422926675	4	Itpr2|Trpc3|Trpc4|Plcl2	-0.76157685
BP	GO:0033690	positive regulation of osteoblast proliferation	19_GO:0008283 cell proliferation	-2.016158034	3.422926675	4	Abl1|Hpse|Ltf|Tmem119	-0.76157685
BP	GO:0033687	osteoblast proliferation	19_GO:0008283 cell proliferation	-2.003851709	3.096624659	6	Abl1|Hpse|Ltf|Smad3|Fignl1|Tmem119	-0.752234969
BP	GO:0034405	response to fluid shear stress	19_GO:0050896 response to stimulus	-2.015289947	3.234364754	5	Ass1|Klf4|Mef2c|Cited2|Spp1	-0.76157685
BP	GO:0040036	regulation of fibroblast growth factor receptor signaling pathway	19_GO:0023052 signaling	-2.003851709	3.096624659	6	Pdgfb|Thbs1|Spry1|Smoc2|Fam20c|Ofd1	-0.752234969
